# Supplementary material for: Genomes of skipper butterflies reveal extensive convergence of wing patterns
Source: PubMed Central journal article supplement — Proc Natl Acad Sci U S A. 2019 Mar 15;116(13):6232–7. doi: 10.1073/pnas.1821304116 (PMC6442542; doi:10.1073/pnas.1821304116), 2019-03-15
Supplement: pnas.1821304116.sapp.pdf [file pnas.1821304116.sapp.pdf]

# SI Appendix to "Genomes of skipper butterflies reveal extensive convergence of wing patterns" by Wenlin Li, Qian Cong, Jinhui Shen, Jing Zhang, Winnie Hallwachs, Daniel H. Janzen and Nick V. Grishin

Published in the Proceedings of the National Academy of Sciences of the United States of America (Online ISSN 1091-6490) on March 15, 2019 as part of the article "Genomes of skipper butterflies reveal extensive convergence of wing patterns" and archived together with it. ZooBank registration for this work is [8A8E82C4-AC8A-4B7B-8DF4-6BFF4BD48F3D](https://doi.org/10.21203/rs.3.rs-1000000).

## Table of Contents

|                                                                                          |    |
|------------------------------------------------------------------------------------------|----|
| <b>Taxonomic Appendix</b> .....                                                          | 3  |
| T1. Taxonomic Abstract .....                                                             | 3  |
| T2. Subfamilies, tribes and subtribes in the family HesperIIDae.....                     | 6  |
| T3. New tribes and subtribes described in Table 1.....                                   | 8  |
| T4. New genera and subgenera described in Table 2.....                                   | 9  |
| T5. Systematic list of Eudaminae proposed in this work .....                             | 10 |
| T6. Systematic list of Eudaminae prior to this publication .....                         | 28 |
| T7. New World <i>Pyrgus</i> , <i>Heliopetes</i> and <i>Heliopyrgus</i> reclassified..... | 46 |
| T8. Justification for changes to HesperIIDae genera.....                                 | 48 |
| T9. Justifications for the change of status from subspecies to species .....             | 49 |
| T10. Taxonomic discussion .....                                                          | 53 |
| <b>Modified (vertical and uncut) Fig. 1 from the main text</b> .....                     | 56 |
| <b>Expanded legend to Fig. 1 from the main text (and shown above, modified)</b> .....    | 57 |
| <b>Methods</b> .....                                                                     | 58 |
| M1. Sample collection and genomic DNA extraction .....                                   | 58 |
| M2. Sequencing library preparation protocol .....                                        | 58 |
| M2.1. Paired-end library preparation protocol .....                                      | 58 |
| M2.2. Preparation for sequencing on the Illumina HiSeq X ten platform .....              | 60 |
| M3. Nuclear and mitochondrial protein-coding gene assembly .....                         | 61 |
| M3.1. Processing of sequencing reads .....                                               | 61 |
| M3.2. Preparation for protein-coding gene assembly.....                                  | 61 |
| M3.3. Protein-coding sequence assembly for phylogenetic study from sequencing reads..... | 62 |
| M3.4. Coding sequence assembly for speciation hotspot studies.....                       | 62 |
| M3.5. Assembling mitochondrial protein-coding genes.....                                 | 63 |
| M3.6. Special procedure to handle extremely poor samples.....                            | 63 |

|                                                                                                                                                                |           |
|----------------------------------------------------------------------------------------------------------------------------------------------------------------|-----------|
| M4. High quality COI barcode assembly strategy .....                                                                                                           | 64        |
| M4.1. Preparing database of barcodes.....                                                                                                                      | 64        |
| M4.2. Selecting barcode baits.....                                                                                                                             | 64        |
| M4.3. Checking consistency and removing contamination .....                                                                                                    | 65        |
| M4.4. Reference-based assembly.....                                                                                                                            | 65        |
| M4.5. <i>De novo</i> assembly .....                                                                                                                            | 65        |
| M4.6. Barcode validation.....                                                                                                                                  | 66        |
| M5. Phylogenetic analysis.....                                                                                                                                 | 66        |
| M5.1. Construction of nuclear and mitochondrial genome alignments.....                                                                                         | 66        |
| M5.2. Construction of phylogenetic trees .....                                                                                                                 | 67        |
| M5.3. Detection of diagnostic nucleotide characters.....                                                                                                       | 68        |
| M6. Identification of genes and SNPs that correlate with morphological differences between mimicry complexes .....                                             | 69        |
| M6.1. Detection of genomic islands for speciation .....                                                                                                        | 69        |
| M6.2. Detection of fixed mutations in mimicry complexes.....                                                                                                   | 70        |
| M7. References .....                                                                                                                                           | 70        |
| <b>Table S1. Data for 250 sequenced HesperIIDae specimens .....</b>                                                                                            | <b>72</b> |
| <b>Table S2. Data for HesperIIDae specimens with COI barcodes .....</b>                                                                                        | <b>75</b> |
| <b>Table S3. Mitochondrial genomes downloaded from NCBI.....</b>                                                                                               | <b>77</b> |
| <b>Table S4. Proteins that are of low intra-species but high inter-species divergence between <i>Telegonus brevicauda</i> and <i>Telegonus chalco</i>.....</b> | <b>77</b> |
| <b>Table S5. Enriched GO terms associated with proteins in Table S4 .....</b>                                                                                  | <b>88</b> |
| <b>Table S6. Genes and mutations that may be related to the phenotype of “extensive white scaling on hindwings” .....</b>                                      | <b>90</b> |
| <b>Table S7. Abbreviations of collections we used specimens from.....</b>                                                                                      | <b>90</b> |
| <b>Figure S1. Phylogenetic tree of HesperIIDae based on coding regions from mitogenome.....</b>                                                                | <b>91</b> |
| <b>Legend to Figure S1: Phylogenetic tree of HesperIIDae based on coding regions from mitogenome ....</b>                                                      | <b>92</b> |
| <b>SI: Diagnostic nucleotide characters mapped to the reference genome of <i>Cecropterus lyciades</i> .....</b>                                                | <b>93</b> |

# Taxonomic Appendix (pages 3 to 55)

This section should be viewed together with Tables 1 and 2 in the main text, and is illustrated with Figure 1 in the main text and Figure S1 in the SI Appendix (pp. 91-92 below)

## T1. Taxonomic abstract

On the basis of genome-scale phylogenetic analysis augmented with the analysis of COI barcodes and morphology, we revised higher classification of the family Hesperidae Latreille, 1809 (Lepidoptera). As a result, the family is partitioned into 9 subfamilies, and 23 tribes and 20 subtribes are delineated. New status (a subfamily) is given to Tagiadinae Mabilite, 1878 (includes Celaenorrhini Swinhoe, 1912) and Pyrrhopyginae Mabilite, 1877 is reinstated as a subfamily. The subfamily Eudaminae Mabilite, 1877 is reclassified into 50 genera and a comprehensive taxonomic list is provided at the subspecies level. The status of a tribe is given to: Phocidini Tutt, 1906, Astictopterini Swinhoe, 1912, Erionotini Distant, 1886, and Megathymini Comstock & Comstock, 1895. Six tribes are described as new: Entheini Grishin, **trib. n.**, Oileidini Grishin, **trib. n.**, Netrocorynini Grishin, **trib. n.**, Jerini Grishin, **trib. n.**, Butleriini Grishin, **trib. n.**, and Pericharini Grishin, **trib. n.** New status (a subtribe) is given to: Thymelicina Tutt, 1905, Calpodina Clark, 1948, Carystina Mabilite 1878, Anthoptina A. Warren, 2009, and Moncina A. Warren, 2008. Six subtribes are described as new: Loboclina Grishin, **subtr. n.**, Cephisina Grishin, **subtr. n.**, Telemiadina Grishin, **subtr. n.**, Typhedanina Grishin, **subtr. n.**, Pythonidina Grishin, **subtr. n.**, and Clitina Grishin, **subtr. n.** The following genera are transferred: *Emmelus* O. Mielke & Casagrande, 2016 to Phocidini; *Jera* Lindsey, 1925 to Pyrrhopyginae; *Cornuphallus* Austin, 1997 to Carcharodini Verity, 1940; *Cabirus* Hübner, [1819], *Grais* Godman & Salvin, 1894, *Tosta* Evans, 1953, *Morvina* Evans, 1953, *Myrinia* Evans, 1953, *Xispia* Lindsey, 1925, *Pseudodrephalys* Burns, 1999, *Mimia* Evans, 1953, *Eracon* Godman & Salvin, 1894, *Spioniades* Hübner, [1819] to Achlyodina Burmeister, 1878; *Clito* Evans, 1953 to Erynnini Brues & Carpenter, 1932; *Asbolis* Mabilite, 1904, *Choranthus* Scudder, 1872, and *Pyrrhocalles* Mabilite, 1904 to Anthoptina; *Lychnuchus* Hübner, [1831], *Wahydra* Steinhauser, 1991, and *Zalomes* E. Bell, 1947 to Moncina; *Molo* Godman, 1900, *Pyrrhopygopsis* Godman, 1901 and *Pseudosarbia* Berg, 1897 to Carystina; *Orphe* Godman, 1901, *Pseudorphe* A. Warren & Dolibaina, 2015, *Lychnuroides* Godman, 1901, *Orses* Godman, 1901, *Alera* Mabilite, 1891, and *Lycas* Godman, 1901 to Pericharini. Nine new genera are described (TS = type species): *Tekliades* Grishin, **gen. n.** (TS: *Thymele ramanatek* Boisduval, 1833) in Coeliadinae Evans, 1937; *Salantoia* Grishin, **gen. n.** (TS: *Eudamus eriopis* Hewitson, 1867), *Spicauda* Grishin, **gen. n.** (TS: *Goniurus procne* Plötz, 1881), *Zeutus* Grishin, **gen. n.** (TS: *Cecropterus zeutus* Möschler, 1879), *Lobotractus* Grishin, **gen. n.** (TS: *Eudamus valeriana* Plötz, 1881) in Eudaminae; *Tiana* Grishin, **gen. n.** (TS: *Ebrietas niger* Williams & Bell, 1940) in Carcharodini; *Chirgus* Grishin, **gen. n.** (TS: *Hesperia (Syrichthus [sic]) limbata* Erschoff, 1876) and *Burnsius* Grishin, **gen. n.** (TS: *Syrichthus [sic] communis* Grote, 1872) in Pyrgini Burmeister, 1878; and *Duroca* Grishin, **gen. n.** (TS: *Hesperia duroca* Plötz, 1882) in Moncina. Three new subgenera of Eudamini are described: *Urbanooides* Grishin, **subgen. n.** (TS: *Goniurus esmeraldus* A. Butler, 1877), *Caudatractus* Grishin, **subgen. n.** (TS: *Eudamus alcaeus* Hewitson, 1867), and *Asina* Grishin, **subgen. n.** (TS: *Eudamus asine* Hewitson, 1867). The following genus-group names are removed from synonymy and are treated as valid genera: *Cecropterus* Herrich-Schäffer, 1869 and *Telegonus* Hübner, 1819; or subgenera: *Murgaria* Watson, 1893 (of *Cecropterus*); *Euthymele* Mabilite, 1878 and *Rhabdoides* Scudder, 1889 (of *Telegonus*). The following genera are treated as subgenera: *Thorybes* Scudder, 1872 (of *Cecropterus*) and *Calliades* Mabilite & Boulet, 1912 (of *Autochton*). The following genera are treated as subjective junior synonyms: *Ocyba* Lindsey, 1925 of *Porphyrogenes* Watson, 1893; *Paracogia* O. Mielke, 1977 of *Cecropterus*; *Achalarus* Scudder, 1872 of *Thorybes*; *Thessia* Steinhauser, 1989 of *Murgaria*; *Cabares* Godman & Salvin, 1894 of *Autochton* Hübner, 1823; *Polythrix* E. Watson, 1893, *Hypocryptothrix* E. Watson, 1893, *Chrysoplectrum* E. Watson, 1893, *Heronia* Mabilite & Boulet, 1912 and *Speculum* Austin, 2008 of *Ectomis* Mabilite, 1878; *Fuscocimex* Austin, 2008 of *Morvina*; *Linka* Evans, 1955 of *Atalopedes* Scudder, 1872 and *Levina* Evans, 1955 of *Ludens* Evans, 1955. The following 30 species are elevated from the subspecies rank (new name combinations given in the next sentence are employed for some taxa here): *Hyalothyruus infa* Evans, 1952, *Hyalothyruus neda* Evans, 1952, *Euriphellus lama* (Evans, 1952), *Euriphellus mena* (Evans, 1952), *Euriphellus polygius* (Latreille, [1824]), *Cecropterus takuta* (Evans, 1952), *Cecropterus rica* (Evans, 1952), *Cecropterus barra* (Evans, 1952), *Telegonus catemacoensis* (H. Freeman, 1967), *Telegonus azul* (Reakirt, [1867]), *Telegonus heriul* Mabilite & Boulet,

1912, *Telegonus cassius* (Evans, 1952), *Narcosius granadensis* (Möschler, 1879), *Narcosius helen* (Evans, 1952), *Epargyreus orizaba* Scudder, 1872, *Epargyreus dicta* Evans, 1952, *Epargyreus pseudexadeus* Westwood, 1852, *Epargyreus cruza* Evans, 1952, *Codattractus rowena* Evans, 1952, *Codattractus apulia* Evans, 1952, *Telemiades contra* Evans, 1953, *Telemiades brazus* E. Bell, 1949, *Oileides guyanensis* (Mabille & Boulet, 1912), *Oechydrus evelinda* (A. Butler, 1870), *Cogia goya* (Evans, 1952), *Marela tamba* Evans, 1953, *Austinus heroica* (Evans, 1953), *Ephyriades dominicensis* E. Bell & W. Comstock, 1948, *Chirgus nigella* (Weeks, 1902), and *Heliopetes orbiger* (Mabille, 1888). Changes (compared to the latest treatment) to result in the following 160 genus-species combinations are proposed: *Pseudonascus prax* (Evans, 1952), *Pseudonascus broteas* (Cramer, 1780), *Pseudonascus solon* (Plötz, 1882), *Aurina azines* (Hewitson, 1867), *Porphyrogenes calathana* (Hewitson, 1868), *Salantioia dinka* (Evans, 1952), *Salantioia eriopis* (Hewitson, 1867), *Euriphellus lama* (Evans, 1952), *Euriphellus phraxanor* (Hewitson, 1876), *Euriphellus mena* (Evans, 1952), *Euriphellus marian* (Evans, 1952), *Cecropterus (Cecropterus) acanthopoda* (O. Mielke, 1977), *Cecropterus (Cecropterus) rinta* (Evans, 1952), *Cecropterus (Cecropterus) zarex* (Hübner, 1818), *Cecropterus (Cecropterus) longipennis* Plötz, 1882, *Cecropterus (Cecropterus) evenus* (Ménétriés, 1855), *Cecropterus (Thorybes) lyciades* (Geyer, 1832), *Cecropterus (Thorybes) casica* (Herrich-Schäffer, 1869), *Cecropterus (Thorybes) tehuacana* (Draudt, 1922), *Cecropterus (Thorybes) confusus* (E. Bell, 1923), *Cecropterus (Thorybes) bathyllus* (J. E. Smith, 1797), *Cecropterus (Thorybes) mexicana* (Herrich-Schäffer, 1869), *Cecropterus (Thorybes) diversus* (E. Bell, 1927), *Cecropterus (Thorybes) pylades* (Scudder, 1870), *Cecropterus (Thorybes) drusius* (W. H. Edwards, [1884]), *Cecropterus (Thorybes) cincta* Plötz, 1882, *Cecropterus (Thorybes) vectilucis* (A. Butler, 1872), *Cecropterus (Thorybes) pseudocellus* (Coolidge & Clemence, [1910]), *Cecropterus (Thorybes) palliolum* (H. Druce, 1908), *Cecropterus (Thorybes) egregius* (A. Butler, 1870), *Cecropterus (Thorybes) virescens* (Mabille, 1877), *Cecropterus (Thorybes) dorantes* (Stoll, 1790), *Cecropterus (Thorybes) obscurus* (Hewitson, 1867), *Cecropterus (Murgaria) albociliatus* (Mabille, 1877), *Cecropterus (Murgaria) toxus* (Plötz, 1882), *Cecropterus (Murgaria) jalapus* (Plötz, 1881), *Cecropterus (Murgaria) athesis* (Hewitson, 1867), *Cecropterus (Murgaria) phalaecus* (Godman & Salvin, 1893), *Cecropterus (Murgaria) reductus* (N. Riley, 1919), *Cecropterus (Murgaria) doryssus* (Swainson, 1831), *Cecropterus (Murgaria) albimargo* (Mabille, 1875), *Cecropterus (Murgaria) takuta* (Evans, 1952), *Cecropterus (Murgaria) rica* (Evans, 1952), *Cecropterus (Murgaria) trebia* (Möschler, 1879), *Cecropterus (Murgaria) carmelita* (Herrich-Schäffer, 1869), *Cecropterus (Murgaria) barra* (Evans, 1952), *Spicauda teleus* (Hübner, 1821), *Spicauda tanna* (Evans, 1952), *Spicauda ambiguus* (de Jong, 1983), *Spicauda cindra* (Evans, 1952), *Spicauda zagorus* (Plötz, 1881), *Spicauda simplicius* (Stoll, 1790), *Spicauda procne* (Plötz, 1881), *Urbanus megalurus* (Mabille, 1877), *Urbanus tucuti* (R. Williams, 1927), *Telegonus (Telegonus) brevicauda* (Plötz, 1886), *Telegonus (Telegonus) chalco* (Hübner, 1823), *Telegonus (Telegonus) fulgerator* (Walch, 1775), *Telegonus (Telegonus) catemacoensis* (H. Freeman, 1967), *Telegonus (Telegonus) azul* (Reakirt, [1867]), *Telegonus (Telegonus) fulgor* Hayward, 1939, *Telegonus (Telegonus) naxos* (Hewitson, 1867), *Telegonus (Telegonus) christyi* Sharpe, 1898, *Telegonus (Telegonus) xagua* (Lucas, 1857), *Telegonus (Telegonus) talus* (Cramer, 1777), *Telegonus (Telegonus) apastus* (Cramer, 1777), *Telegonus (Rhabdoides) elorus* (Hewitson, 1867), *Telegonus (Rhabdoides) alardus* (Stoll, 1790), *Telegonus (Rhabdoides) habana* (Lucas, 1857), *Telegonus (Rhabdoides) heriul* Mabille & Boulet, 1912, *Telegonus (Rhabdoides) alector* (C. Felder & R. Felder, 1867), *Telegonus (Rhabdoides) cretatus* Hayward, 1939, *Telegonus (Rhabdoides) creteus* (Cramer, 1780), *Telegonus (Rhabdoides) bifascia* (Herrich-Schäffer, 1869), *Telegonus (Rhabdoides) latimargo* (Herrich-Schäffer, 1869), *Telegonus (Rhabdoides) tinda* (Evans, 1952), *Telegonus (Rhabdoides) chiriquensis* Staudinger, 1876, *Telegonus (Rhabdoides) weymeri* (Plötz, 1882), *Telegonus (Rhabdoides) jaira* (A. Butler, 1870), *Telegonus (Rhabdoides) cassander* (Fabricius, 1793), *Telegonus (Rhabdoides) galesus* Mabille, 1888, *Telegonus (Rhabdoides) cassius* (Evans, 1952), *Telegonus (Rhabdoides) anaphus* (Cramer, 1777), *Telegonus (Rhabdoides) hyster* (Dyar, 1916), *Telegonus (Rhabdoides) cellus* (Boisduval & Le Conte, [1837]), *Telegonus (Rhabdoides) siernadror* (Burns, 1984), *Autochton (Autochton) potrillo* (Lucas, 1857), *Autochton (Calliades) oryx* (C. Felder & R. Felder, 1862), *Zeutus zeutus* (Möschler, 1879), *Lobotractus valeriana* (Plötz, 1881), *Lobotractus uvydixa* (Dyar, 1914), *Lobotractus cyda* (Godman, 1901), *Ectomis (Asina) gyges* (Evans, 1952), *Ectomis (Asina) hirtius* (A. Butler, 1870), *Ectomis (Asina) roma* (Evans, 1952), *Ectomis (Asina) asine* (Hewitson, 1867), *Ectomis (Asina) mexicanus* (H. Freeman, 1969), *Ectomis (Ectomis) octomaculata* (Sepp, [1844]), *Ectomis (Ectomis) maizae* (Hellebuyck, 1998), *Ectomis (Ectomis) ceculus* (Herrich-Schäffer, 1869), *Ectomis (Ectomis) caunus* (Herrich-Schäffer, 1869), *Ectomis (Ectomis) auginus* (Hewitson, 1867), *Ectomis (Ectomis) metallescens* (Mabille, 1888), *Ectomis (Ectomis) kanshul* (Shuey, 1991), *Ectomis (Ectomis) eudoxus* (Stoll, 1781), *Ectomis (Ectomis) minvanes* (R. Williams,

1926), *Ectomis (Ectomis) labriaris* (A. Butler, 1877), *Ectomis (Ectomis) speculum* (Austin, 2008), *Ectomis (Ectomis) teutas* (Hewitson, 1876), *Ectomis (Ectomis) pervivax* (Hübner, [1819]), *Ectomis (Ectomis) bahiana* (Herrich-Schäffer, 1869), *Ectomis (Ectomis) orphne* (Plötz, 1881), *Ectomis (Ectomis) otriades* (Hewitson, 1867), *Ectomis (Ectomis) epicincea* (A. Butler & H. Druce, 1872), *Ectomis (Ectomis) perniciosus* (Herrich-Schäffer, 1869), *Ectomis (Ectomis) cuminaensis* (R.F. d'Almeida, 1976), *Ectomis (Ectomis) orpheus* (Plötz, 1881), *Ectomis (Ectomis) perna* (Evans, 1952), *Ectomis (Ectomis) albovenae* (E. Bell, 1932), *Typhedanus cajeta* (Herrich-Schäffer, 1869), *Typhedanus aventinus* (Godman & Salvin, 1894), *Typhedanus mala* (Evans, 1953), *Typhedanus buena* (A. Warren, Dolibaina & Hernández-Mejía, 2015), *Cogia crameri* (McHenry, 1960), *Cogia undulatus* (Hewitson, 1867), *Cogia galbula* (Plötz, 1881), *Cogia optica* (Evans, 1952), *Cogia goya* (Evans, 1952), *Cogia stylites* (Herrich-Schäffer, 1869), *Cogia cursinoi* (O. Mielke, 1979), *Cogia eliasi* (O. Mielke, 1979), *Cogia aziris* (Hewitson, 1867), *Tiana niger* (Williams & Bell, 1940), *Tiana platypterus* (Mabille, 1895), *Morvina caecus* (Austin, 2008), *Clito mnemon* (Schaus, 1913), *Chirgus limbata* (Erschoff, 1876), *Chirgus nigella* (Weeks, 1902), *Chirgus barrosi* (Ureta, 1956), *Chirgus fides* (Hayward, 1940), *Chirgus bocchoris* (Hewitson, 1874), *Chirgus veturius* (Plötz, 1884), *Burnsius notatus* (Blanchard, 1852), *Burnsius crisia* (Herrich-Schäffer, 1865), *Burnsius communis* (Grote, 1872), *Burnsius albescens* (Plötz, 1884), *Burnsius adepta* (Plötz, 1884), *Burnsius orcynoides* (Giacomelli, 1928), *Burnsius chloe* (Evans, 1942), *Burnsius titicaca* (Reverdin, 1921), *Burnsius philetas* (W. H. Edwards, 1881), *Burnsius oileus* (Linnaeus, 1767), *Burnsius orcus* (Stoll, 1780), *Burnsius brenda* (Evans, 1942), *Heliopetes americanus* (Blanchard, 1852), *Heliopetes domicella* (Erichson, [1849]), *Heliopetes sublinea* Schaus, 1902, *Ludens levina* (Plötz, 1884), *Duroca duroca* (Plötz, 1882), and *Atalopedes lina* (Plötz, 1883). Furthermore, the following 7 species of *Urbanus* were placed in the new subgenus *Urbanoides*: *U. esmeraldus* (A. Butler, 1877), *U. esma* Evans, 1952, *U. prodicus* E. Bell, 1956, *U. elmina* Evans, 1952, *U. evona* Evans, 1952, *U. esta* Evans, 1952, *U. viridis* H. Freeman, 1970; the following 6 species of *Codatractus* were placed in the new subgenus *Caudatractus*: *C. carlos* Evans, 1952, *C. rowena* Evans, 1952 (including *C. r. arguta* Evans, 1952 as its subspecies), *C. alcaeus* (Hewitson, 1867), *C. apulia* Evans, 1952, *C. yucatanus* H. Freeman, 1977, *C. aminias* (Hewitson, 1867); and *Heliopetes purgia* Schaus, 1902 was placed in the subgenus *Heliopyrgus* Herrera, 1957. All of the above-listed changes are propagated to all names treated as subspecies and synonyms of these taxa. Finally, taxa not mentioned in this work are considered to remain at the ranks and in taxonomic groups (genera, tribes or subtribes resulting from proposed here status change of a tribe to subtribe) they have been previously assigned to.

## T2. Subfamilies, tribes and subtribes in the family HesperIIDae

The family HesperIIDae consists of 4 major phylogenetic lineages "Auls", "Regents", "Flats" and "Grass skippers" (Fig. 1 in the main text), with the first two found exclusively in the Old World and the last two having worldwide distribution. It should be noted that these commonly used English group names are not perfect. "Grass skippers" are indeed mostly monocot feeders as caterpillars, but many also feed of palms (Arecaceae) and sedges (Cyperaceae) among other monocots in addition to grasses (Poaceae). A large number of "Flats" hold their wings erect, not spread-out flat. See Warren et al. (2009) for data on caterpillar foodplants and resting posture of adults.

The following higher classification of HesperIIDae is proposed here. New tribes and subtribes are described in Table 1 in the main text. Comprehensive species list for the subfamily Eudaminae (focus of this study) is given below (pp. 10-27). Genera included in other subfamilies and tribes are given in Warren et al. (2009) and Warren et al. (2013), and for the new tribes and subtribes are listed below (p. 8). Changes in taxonomic status or new taxa are indicated in red font after the name. New taxa are additionally highlighted yellow. "Reinstated status" means that the rank of the taxon is changed from its latest treatment to that used previously. Synonyms are denoted by "=" in front of the name.

Warren AD, Ogawa JR, Brower AVZ. 2009. Revised classification of the family HesperIIDae (Lepidoptera: Hesperioidea) based on combined molecular and morphological data. *Systematic Entomology* **34**(3): 467-523;

Warren AD, Davis KJ, Stangeland EM, Pelham JPP, Willmott KR, Grishin NV. 2013. Illustrated Lists of American Butterflies. [21-XI-2017] <<http://www.butterfliesofamerica.com/L/HesperIIDae.htm>> (accessed on March 2, 2019).

### "Auls"

1. Subfamily **Coeliadinae** Evans, 1937; confirmed status

### "Regents"

2. Subfamily **Euschemoninae** Kirby, 1897; confirmed status

### "Flats"

3. Subfamily **Eudaminae** Mabille, 1877; confirmed status
  - 3.1. Tribe **Entheini** Grishin, new tribe
  - 3.2. Tribe **Phocidini** Tutt, 1906; new status
  - 3.3. Tribe **Eudamini** Mabille, 1877
    - 3.3.1. Subtribe **Eudamina** Mabille, 1877
    - 3.3.2. Subtribe **Loboclina** Grishin, new subtribe
    - 3.3.3. Subtribe **Cephisina** Grishin, new subtribe
    - 3.3.4. Subtribe **Telemiadina** Grishin, new subtribe
  - 3.4. Tribe **Oileidini** Grishin, new tribe
    - 3.4.1. Subtribe **Oileidina** Grishin
    - 3.4.2. Subtribe **Typhedanina** Grishin, new subtribe
4. Subfamily **Tagiaginae** Mabille, 1878; new status
  - 4.1. Tribe **Celaenorhinini** Swinhoe, 1912; confirmed status
  - 4.2. Tribe **Netrocorynini** Grishin, new tribe
  - 4.3. Tribe **Tagiadini** Mabille, 1878
5. Subfamily **Pyrrhopyginae** Mabille, 1877; reinstated status
  - 5.1. Tribe **Pyrrhopygini** Mabille, 1877
    - 5.1.1. Subtribe **Passovina** Mielke, 2001; confirmed status
    - 5.1.2. Subtribe **Zoniina** Mielke, 2001; confirmed status
    - 5.1.2. Subtribe **Oxynetrina** Mielke, 2001; confirmed status
    - 5.1.4. Subtribe **Pyrrhopygina** Mabille, 1877; confirmed status
  - 5.2. Tribe **Jerini** Grishin, new tribe

- 6. Subfamily **Pyrginae** Burmeister, 1878
  - 6.1. Tribe **Carcharodini** Verity, 1940; confirmed status
  - 6.2. Tribe **Achlyodini** Burmeister, 1878; confirmed status
    - 6.2.1. Subtribe **Achlyodina** Burmeister, 1878
    - 6.2.2. Subtribe **Pythonidina** Grishin, new subtribe
  - 6.3. Tribe **Erynnini** Brues & Carpenter, 1932; confirmed status
    - 6.3.1. Subtribe **Erynnina** Brues & Carpenter, 1932
    - 6.3.2. Subtribe **Clitina** Grishin, new subtribe
  - 6.4. Tribe **Pyrgini** Burmeister, 1878; confirmed status

**"Jets" or "Grass skippers"**

- 7. Subfamily **Heteropterae** Aurivillius, 1925; confirmed status
  - 7.1. Tribe **Heteropterini** Aurivillius, 1925
  - 7.2. Tribe **Butleriini** Grishin, new tribe
- 8. Subfamily **Trapezitinae** Waterhouse & Lyell, 1914; confirmed status
- 9. Subfamily **Hesperiinae** Latreille, 1809
  - 9.1. Tribe **Aeromachini** Tutt, 1906; confirmed status
  - 9.2. Tribe **Astictopterini** Swinhoe, 1912; new status
    - =Isoteinonini Chou, 1994
    - =Eogenina Koçak & Seven, 1997
  - 9.3. Tribe **Erionotini** Distant, 1886; reinstated status
    - =Suastinae Doherty, 1886
    - =Matapinae Swinhoe, 1912
    - =Notocryptinae Swinhoe, 1912
    - =Plastingiinae Swinhoe, 1913
    - =Ancistroidini Chou, 1994
    - =Unkanina Koçak & Seven, 1997
  - 9.4. Tribe **Taractrocerini** Voss, 1952; confirmed status
  - 9.5. Tribe **Baorini** Doherty, 1886; confirmed status
  - 9.6. Tribe **Hesperiini** Latreille, 1809
    - 9.6.1. Subtribe **Thymelicina** Tutt, 1905; new status
    - 9.6.2. Subtribe **Calpodina** Clark, 1948; new status
    - 9.6.3. Subtribe **Carystina** Mabille 1878; new status
    - 9.6.4. Subtribe **Anthoptina** A. Warren, 2009; new status
    - 9.6.5. Subtribe **Moncina** A. Warren, 2008; new status
    - 9.6.6. Subtribe **Hesperiina** Latreille, 1809
  - 9.7. Tribe **Pericharini** Grishin, new tribe
  - 9.8. Tribe **Megathymini** Comstock & Comstock, 1895; new status
    - =Aegialini Stallings & Turner, 1958
    - =Agathymini Stallings & Turner, 1959

### T3. New tribes and subtribes described in Table 1

with their ZooBank registration URLs and lists of included genera. For tribes and subtribes in the subfamily Eudaminae complete lists of species included are given below (pp. 10-27) and are omitted here.

**Entheini** Grishin, new tribe

<http://zoobank.org/303C1FD0-07CB-4919-900E-EA3D6347E5DD>

**Loboclina** Grishin, new subtribe

<http://zoobank.org/C606FC35-323D-4E55-AF5A-A86C6366BAFA>

**Cephisina** Grishin, new subtribe

<http://zoobank.org/22B59811-F174-4FDF-A9D2-799897F4D44E>

**Telemiadina** Grishin, new subtribe

<http://zoobank.org/4AE0E59C-8B92-4C84-8651-E7A1C45C93C1>

**Oileidini** Grishin, new tribe

<http://zoobank.org/CF9C3D29-523A-4D17-B140-9A69CFA98731>

**Typhedanina** Grishin, new subtribe

<http://zoobank.org/B4D56F93-67F9-476F-B69C-133D98BFBD58>

**Netrocorynini** Grishin, new subtribe

<http://zoobank.org/DE61F048-02CF-4F8E-9392-D18A4618BABD>

Genera included: *Netrocoryne* C. Felder & R. Felder, [1867], *Chaetocneme* Felder 1860, and *Exometoeca* Meyrick, 1888.

**Jerini** Grishin, new tribe

<http://zoobank.org/AF3B5CEA-880A-4CB2-AF40-E6D87C39C040>

Genera included: *Jera* Lindsey, 1925.

**Pythonidina** Grishin, new subtribe

<http://zoobank.org/CB890271-5483-4B5A-A7BC-27DBC5E23DE5>

Genera included: *Ouleus* Lindsey, 1925, *Zera* Evans, 1953, *Quadrus* Lindsey, 1925, *Gindanes* Godman & Salvin, 1895, *Pythonides* Hübner, [1819], *Haemactis* Mabilie, 1903, *Atarnes* Godman & Salvin, 1897, *Eburuncus* Grishin, 2012, *Milanion* Godman & Salvin, 1895, *Paramimus* Hübner, [1819], and *Charidia* Mabilie, 1903.

**Clitina** Grishin, new subtribe

<http://zoobank.org/971884E2-E5F7-46A3-B182-657729B6A778>

Genera included: *Clito* Evans, 1953.

**Butleriini** Grishin, new tribe

<http://zoobank.org/D621EF81-FA65-4858-9450-E0C041598D7A>

Genera included: *Butleria* Kirby, 1871 and *Argopteron* E. Watson, 1893.

**Pericharini** Grishin, new tribe

<http://zoobank.org/94B68BD2-7F83-4E58-80E1-7F5AC8C56511>

Genera included: *Perichares* Scudder, 1872, *Alera* Mabilie, 1891, *Orses* Godman, 1901, *Lycas* Godman, 1901, *Lychnuchoides* Godman, 1901, *Pseudorphe* A. Warren & Dolibaina, 2015, and *Orphe* Godman, 1901.



## T4. New genera and subgenera described in Table 2

with their ZooBank registration URLs and lists of included species. For genera and subgenera in the subfamily Eudaminae (placement not indicated) and for the genera *Chirgus* and *Burnsius* complete lists of species included are given below (pp. 10-27 & 46-47) and are omitted here. Names of type species are underlined.

***Tekliades*** Grishin, new genus

<http://zoobank.org/081564BA-DA0C-4C46-AEAB-6C00131AC8BD>

Placed in subfamily Coeliadinae.

Species included: *Thymele ramanatek* Boisduval, 1833.

***Salantioia*** Grishin, new genus

<http://zoobank.org/3F82E9DE-A5A2-44B3-A13D-53CF8A673FAE>

***Spicauda*** Grishin, new genus

<http://zoobank.org/14D26B57-940C-407B-8E70-4E25203044B8>

***Urbanoides*** Grishin, new subgenus

<http://zoobank.org/20FAC3B6-F038-40A0-B182-3C7F32A40702>

***Zeutus*** Grishin, new genus

<http://zoobank.org/75715B9C-46AB-40F5-B738-420DABD56B63>

***Lobotractus*** Grishin, new genus

<http://zoobank.org/C6E5B5DF-1C74-4DBD-85C3-7285209F6F03>

***Caudatractus*** Grishin, new subgenus

<http://zoobank.org/DF0F3C91-F56E-4B65-B86C-385A36F9D7FD>

***Asina*** Grishin, new subgenus

<http://zoobank.org/B3B7A6F6-A95C-4A2E-B9FB-80A7A8F86761>

***Tiana*** Grishin, new genus

<http://zoobank.org/B9382699-24FB-4466-B39B-94E6B544C425>

Placed in the tribe Carcharodini.

Species included: *Ebrietas niger* Williams & Bell, 1940 and *Anastrus platypterus* Mabilie, 1895.

***Chirgus*** Grishin, new genus

<http://zoobank.org/7B1905F1-9471-4BBF-90BF-32360783AB1E>

Placed in the tribe Pyrgini.

***Burnsius*** Grishin, new genus

<http://zoobank.org/48996B74-3AB1-4DEA-9A64-B8F112E62343>

Placed in the tribe Pyrgini.

***Duroca*** Grishin, new genus

<http://zoobank.org/476FE13C-5895-4139-BB11-44F835E21565>

Placed in the subtribe Moncina.

Species included: *Hesperia duroca* Plötz, 1882.

## T5. Systematic list of Eudaminae proposed in this work

The list is modified from the one shown below (pp. 28-45) to incorporate the results of our genomic analyses augmented with mitochondrial DNA COI barcodes, genitalia, and facies. The changes are supported by phylogenetic trees shown in Fig. 1 (main text) and Fig. S1 (below, pp. 91-92) and justifications given below in sections T8 & 9 (pp. 48-52). Synonymic names are included for genera and subgenera. Names treated as synonyms (genera and names of type species that are considered to be synonyms) are preceded by "=": not followed by daggers are subjective junior synonyms; † objective junior synonyms; ‡ unavailable names (such as homonyms and nomina nuda); "preocc." indicates preoccupied and "repl." indicates replacement name, the taxonomic order (for insects) or class of the senior name is shown in brackets. Synonyms are attributed to subgenera where possible. Type species (TS) for genera and subgenera are listed with their author names (parenthesis not used and genus name not given). For type species that are considered to be synonyms, valid names are shown in parenthesis. For valid genera and subgenera (not their synonyms), names of the type species, or its nominal subspecies for not monotypic species, or names which type species are considered to be synonyms of, are underlined in the list. Genus-group name highlighted yellow indicates a new taxon described in this work. Species with name highlighted yellow is elevated from subspecies in this work (see T9, pp. 49-52 for justification). Genus name in red font indicates different genus-species combination (new or reinstated) than that used prior to this work (pp. 28-45). The type of change is explained in red font after the name, and the genus of former placement (if different from the one used here) is listed.

### Subfamily Eudaminae Mabille, 1877

#### Tribe Entheini Grishin, new tribe

**Drephalys** E. Watson, 1893; TS: *helixus* Hewitson

Subgenus *Paradrephalys* Burns, 2000; TS: *dumeril* Latreille

***Drephalys oria*** Evans, 1952

***Drephalys oriander*** (Hewitson, 1867)

***Drephalys talboti*** (Le Cerf, 1922)

***Drephalys dumeril*** (Latreille, [1824])

***Drephalys croceus*** Austin, 1995

***Drephalys tortus*** Austin, 1995

Subgenus *Drephalys* E. Watson, 1893; TS: *helixus* Hewitson

=*Paradros* Watson, 1893; TS: *phoenice* Hewitson

***Drephalys alcmon*** (Cramer, 1780)

***Drephalys mourei*** O. Mielke, 1968

***Drephalys helixus*** (Hewitson, 1877)

***Drephalys kidonoi*** Burns, 2000

***Drephalys phoenicoides*** (Mabille & Boulet, 1919)

***Drephalys phoenice*** (Hewitson, 1867)

***Drephalys heraclides*** E. Bell, 1942

***Drephalys citrinus*** Madruga, Siewert, O. Mielke & Casagrande, 2018

***Drephalys dracarys*** Madruga, Siewert, O. Mielke & Dolibaina, 2018

***Drephalys electrinus*** Siewert, Madruga, O. Mielke & Dolibaina, 2018

***Drephalys miersi*** O. Mielke, 1968

***Drephalys opifex*** Evans, 1952

***Drephalys olvina*** Evans, 1952

***Drephalys olva*** Evans, 1952

***Drephalys eous*** (Hewitson, 1867)

**Udranomia** A. Butler, 1870; TS: *orcinus* C. Felder & R. Felder

=†*Hydraenomia* Butler, 1870; TS: *orcinus* C. Felder & R. Felder

***Udranomia eurus*** (Mabille & Boulet, 1919)

*Udranomia tomdaleyi* Burns, 2017  
*Udranomia sallydaleyae* Burns, 2017  
*Udranomia kikkawai* (Weeks, 1906)  
*Udranomia orcinus* (C. Felder & R. Felder, 1867)  
*Udranomia spitzii* (Hayward, 1942)

**Phanus** Hübner, [1819]; TS: *vitreus* Stoll

*Phanus australis* L. Miller, 1965  
*Phanus vitreus* (Stoll, 1781)  
*Phanus ecitonorum* Austin, 1993  
*Phanus confusis* Austin, 1993  
*Phanus albiapicalis* Austin, 1993  
*Phanus rilma* Evans, 1952  
*Phanus grandis* Austin, 1993  
*Phanus obscurior* Kaye, 1925  
*Phanus obscurior obscurior* Kaye, 1925  
*Phanus obscurior prestoni* L. Miller, 1965  
*Phanus marshalli* (W. F. Kirby, 1880)

**Hyalothyryus** Mabille, 1878; TS: *nitocris* Stoll

=*Lignyostola* Mabille, 1888; TS: *pemphigargyra* Mabille  
=‡*Mionectes* Mabille, 1903 (preocc. *Mionectes* Cabanis, 1844 [Aves]); TS: *infernalis* Möschler  
=*Plagiothyryus* Mabille & Boulet, 1919; TS: *leucomelas* Geyer  
=*Onzis* Lindsey, 1925 (repl. *Mionectes* Mabille); TS: *infernalis* Möschler  
*Hyalothyryus infernalis* (Möschler, 1877)  
*Hyalothyryus infa* Evans, 1952; new status  
*Hyalothyryus leucomelas* (Geyer, 1832)  
*Hyalothyryus nitocris* (Stoll, 1782)  
*Hyalothyryus mimicus* Mabille & Boulet, 1919  
*Hyalothyryus neleus* (Linnaeus, 1758)  
*Hyalothyryus neleus pemphigargyra* (Mabille, 1888)  
*Hyalothyryus neleus neleus* (Linnaeus, 1758)  
*Hyalothyryus neda* Evans, 1952; new status

**Entheus** Hübner, [1819]; TS: =*peleus* Linnaeus, 1763 (*priassus* Linnaeus)

=‡*Peleus* Swainson, 1831 (preocc. *Peleus* Rafinesque, 1815 [Crustacea]); TS: =*peleus* Linnaeus (*priassus* Lin.)  
=‡*Brachycneme* C. Felder & R. Felder, 1862; TS: =*peleus* Linnaeus (*priassus* Linnaeus)  
*Entheus eumelus* (Cramer, 1777)  
*Entheus ninyas* H. Druce, 1912  
*Entheus eunyas* Austin, O. Mielke & Steinhauser, 1997  
*Entheus lemna* (A. Butler, 1870)  
*Entheus gentius* (Cramer, 1777)  
*Entheus bombus* Austin, O. Mielke & Steinhauser, 1997  
*Entheus aureolus* Austin, O. Mielke & Steinhauser, 1997  
*Entheus huertasae* Grishin, 2013  
*Entheus telemus* Mabille, 1898  
*Entheus latebrosus* Austin, 1997  
*Entheus priassus* (Linnaeus, 1758)  
*Entheus priassus priassus* (Linnaeus, 1758)  
*Entheus priassus pralina* Evans, 1952  
*Entheus aureanota* Austin, O. Mielke & Steinhauser, 1997

***Entheus curvus*** Austin, 1997  
***Entheus matho*** Godman & Salvin, 1879  
*Entheus matho matho* Godman & Salvin, 1879  
*Entheus matho latifascius* M. Hering, 1925  
*Entheus matho marmato* Salazar & Vargas, 2017  
*Entheus matho aequatorius* Mabille & Boulet, 1919  
*Entheus matho dius* Mabille, 1898  
***Entheus crux*** Steinhauser, 1989  
***Entheus warreni*** Grishin, 2012

***Augiades*** Hübner, [1819]; TS: *criniscus* Cramer  
***Augiades criniscus*** (Cramer, 1780)  
***Augiades epimethea*** (Plötz, 1883)  
*Augiades epimethea bicolor* (Mabille & Boulet, 1919)  
*Augiades epimethea epimethea* (Plötz, 1883)

***Tarsoctenus*** E. Watson, 1893; TS: *plutia* Hewitson  
***Tarsoctenus praecia*** (Hewitson, 1857)  
*Tarsoctenus praecia praecia* (Hewitson, 1857)  
*Tarsoctenus praecia rufibasis* Boulet, 1910  
*Tarsoctenus praecia plutia* (Hewitson, 1857)  
*Tarsoctenus praecia luna* Evans, 1952  
***Tarsoctenus corytus*** (Cramer, 1777)  
*Tarsoctenus corytus gaudialis* (Hewitson, 1876)  
*Tarsoctenus corytus corytus* (Cramer, 1777)  
*Tarsoctenus corytus corba* Evans, 1952  
***Tarsoctenus papias*** (Hewitson, 1857)

#### Tribe Phocidini Tutt, 1906

***Phocides*** Hübner, [1819]; TS: =*cruentus* Hübner, [1819] (*polybius* Fabricius)  
=*Erycides* Hübner, [1819]; TS: *pigmalion* Cramer  
=*Dysenius* Scudder, 1872; TS: =*albicilla* Herrich-Schäffer, 1869 (*lilea* Reakirt)  
***Phocides polybius*** (Fabricius, 1793)  
*Phocides polybius lilea* (Reakirt, [1867])  
*Phocides polybius polybius* (Fabricius, 1793)  
*Phocides polybius phanias* (Burmeister, 1880)  
***Phocides charon*** (C. Felder & R. Felder, 1859)  
***Phocides petroleum*** Siewert, Leviski, Mielke & Casagrande, 2018  
***Phocides distans*** (Herrich-Schäffer, 1869)  
*Phocides distans licinus* (Möschler, 1879)  
*Phocides distans distans* (Herrich-Schäffer, 1869)  
*Phocides distans silva* Evans, 1952  
***Phocides perillus*** (Mabille, 1888)  
***Phocides metrodorus*** E. Bell, 1932  
*Phocides metrodorus nigrescens* E. Bell, 1938  
*Phocides metrodorus metrodorus* E. Bell, 1932  
*Phocides metrodorus metron* Evans, 1952  
***Phocides vulcanides*** Röber, 1925  
***Phocides novalis*** Evans, 1952  
***Phocides thermus*** (Mabille, 1883)  
*Phocides thermus thermus* (Mabille, 1883)

*Phocides thermus bellina* Evans, 1952  
*Phocides thermus valgus* (Mabille, 1883)

***Phocides partia*** Evans, 1952

***Phocides padrona*** Evans, 1952

***Phocides belus*** Godman & Salvin, 1893

***Phocides pigmalion*** (Cramer, 1779)

*Phocides pigmalion pigmalion* (Cramer, 1779)

*Phocides pigmalion hewitsonius* (Mabille, 1883)

*Phocides pigmalion okeechobee* (Worthington, 1881)

*Phocides pigmalion batabanoides* (W. Holland, 1902)

*Phocides pigmalion batabano* (Lucas, 1857)

*Phocides pigmalion bicolora* (Boddaert, 1783)

***Phocides johnsoni*** E. Bell, 1947

***Phocides urania*** (Westwood, 1852)

*Phocides urania urania* (Westwood, 1852)

*Phocides urania vida* (A. Butler, 1872)

***Phocides pialia*** (Hewitson, 1857)

*Phocides pialia maximus* (Mabille, 1888)

*Phocides pialia intermedia* O. Mielke, 1992

*Phocides pialia pialia* (Hewitson, 1857)

***Phocides oreides*** (Hewitson, [1875])

*Phocides oreides colombiana* E. Bell, 1938

*Phocides oreides oreides* (Hewitson, [1875])

***Phocides yokhara*** (A. Butler, 1870)

*Phocides yokhara yokhara* (A. Butler, 1870)

*Phocides yokhara inca* Le Cerf, 1922

*Phocides yokhara dryas* Le Cerf, 1922

*Phocides yokhara charonotis* (Hewitson, 1874)

***Phocides lincea*** (Herrich-Schäffer, 1869)

***Phocides perkinsi*** (Kaye, 1931)

***Pseudonascus*** Austin, 2008; TS: *paullinae* Sepp

***Pseudonascus paullinae*** (Sepp, [1842])

***Pseudonascus prax*** (Evans, 1952); **new combination**, was in *Nascus*

***Pseudonascus broteas*** (Cramer, 1780); **new combination**, was in *Nascus*

***Pseudonascus solon*** (Plötz, 1882); **new combination**, was in *Nascus*

*Pseudonascus solon corilla* (Evans, 1952) ); **new combination**, was in *Nascus*

*Pseudonascus solon solon* (Plötz, 1882) ); **new combination**, was in *Nascus*

***Nascus*** E. Watson, 1893; TS: *phocus* Cramer

***Nascus phocus*** (Cramer, 1777)

***Nascus phintias*** Schaus, 1913

***Aurina*** Evans, 1937; TS: *dida* Evans

***Aurina dida*** Evans, 1937

***Aurina azines*** (Hewitson, 1867); **new combination**, was in *Oileides*

***Emmelus*** O. Mielke & Casagrande , 2016; **new placement**, was in Pyrginae; TS: *purpurascens* Mabille & Boulet

***Emmelus purpurascens*** (Mabille & Boulet, 1912)

***Porphyrogenes*** E. Watson, 1893; TS: *omphale* A. Butler

=‡*Caecina* Hewitson, 1868 (preocc. *Caecina* Stål, 1863 [Hemiptera]); **new synonym**; TS: *calathana* Hewitson

=*Physalea* Mabille, 1903; TS: *vulpecula* Plötz

=*Ocyba* Lindsey, 1925 (repl. *Caecina* Hewitson); **new synonym**; TS: *calathana* Hewitson

***Porphyrogenes stupa*** Evans, 1952

***Porphyrogenes omphale*** (A. Butler, 1871)

***Porphyrogenes passalus*** (Herrich-Schäffer, 1869)

***Porphyrogenes speciosus*** Austin & O. Mielke, 2008

***Porphyrogenes convexus*** Austin & O. Mielke, 2008

***Porphyrogenes sparus*** Austin & O. Mielke, 2008

***Porphyrogenes spadix*** Austin & O. Mielke, 2008

***Porphyrogenes peterwegei*** Burns, 2010

***Porphyrogenes sororcula*** (Mabille & Boulet, 1912)

***Porphyrogenes specularis*** Austin & O. Mielke, 2008

***Porphyrogenes probus*** (Möschler, 1877)

***Porphyrogenes vulpecula*** (Plötz, 1882)

***Porphyrogenes zohra*** (Möschler, 1879)

***Porphyrogenes virgatus*** (Mabille, 1888)

***Porphyrogenes eudemus*** (Mabille, 1888)

***Porphyrogenes splendidus*** Austin & O. Mielke, 2008

***Porphyrogenes simulator*** Austin & O. Mielke, 2008

***Porphyrogenes sula*** (R. Williams & E. Bell, 1940)

***Porphyrogenes spina*** Austin & O. Mielke, 2008

***Porphyrogenes sporta*** Austin & O. Mielke, 2008

***Porphyrogenes stresa*** Evans, 1952

***Porphyrogenes boliva*** Evans, 1952

***Porphyrogenes spoda*** Evans, 1952

***Porphyrogenes ferruginea*** (Plötz, 1883)

***Porphyrogenes despecta*** (A. Butler, 1870)

***Porphyrogenes pausias*** (Hewitson, 1867)

***Porphyrogenes spanda*** Evans, 1952

***Porphyrogenes sparta*** Evans, 1952

***Porphyrogenes glavia*** Evans, 1952

***Porphyrogenes calathana*** (Hewitson, 1868); **new combination**, was in *Ocyba*

***Porphyrogenes calathana calanus*** (Godman & Salvin, 1894); **new combination**, was in *Ocyba*

***Porphyrogenes calathana calathana*** (Hewitson, 1868); **new combination**, was in *Ocyba*

***Porphyrogenes calathana compusa*** (Hewitson, 1868); **new combination**, was in *Ocyba*

***Nicephellus*** Austin, 2008; TS: *nicephorus* Hewitson

***Nicephellus nicephorus*** (Hewitson, 1876)

***Salatis*** Evans, 1952; TS: *salatis* Stoll

***Salatis canalis*** (Skinner, 1920)

***Salatis salatis*** (Stoll, 1782)

***Salatis cebrenus*** (Cramer, 1777)

***Salatis fulvius*** (Plötz, 1882)

***Salatis scyrus*** (E. Bell, 1934)

***Salatis flavomarginatus*** (Sepp, [1851])

***Salantioia*** Grishin, **new genus**; TS: *eriopis* Hewitson

***Salantioia dinka*** (Evans, 1952); **new combination**, was in *Sarmientoia*

***Salantioia eriopis*** (Hewitson, 1867); **new combination**, was in *Sarmientoia*

**Sarmientoia** Berg, 1897; TS: *faustinus* Burmeister

***Sarmientoia phaselis*** (Hewitson, 1867)

***Sarmientoia faustinus*** (Burmeister, 1878)

***Sarmientoia haywardi*** O. Mielke, 1967

***Sarmientoia similis*** O. Mielke, 1967

***Sarmientoia almeidai*** O. Mielke, 1967

***Sarmientoia browni*** O. Mielke, 1967

**Bungalotis** E. Watson, 1893; TS: *midas* Cramer

***Bungalotis erythus*** (Cramer, 1775)

***Bungalotis diophorus*** (Möschler, 1883)

***Bungalotis gagarini*** O. Mielke, 1967

***Bungalotis midas*** (Cramer, 1775)

***Bungalotis aureus*** Austin, 2008

***Bungalotis astylos*** (Cramer, 1780)

***Bungalotis milleri*** H. Freeman, 1977

***Bungalotis quadratum*** (Sepp, [1845])

*Bungalotis quadratum quadratum* (Sepp, [1845])

*Bungalotis quadratum barba* Evans, 1952

***Bungalotis sipa*** de Jong, 1983

***Bungalotis clusia*** Evans, 1952

***Bungalotis borax*** Evans, 1952

***Bungalotis lactos*** Evans, 1952

**Euriphellus** Austin, 2008; TS: *euribates* Stoll

***Euriphellus lama*** (Evans, 1952); **new status, new combination**, was in *Dyscophellus*

***Euriphellus phraxanor*** (Hewitson, 1876); **new combination**, was in *Dyscophellus*

***Euriphellus mena*** (Evans, 1952); **new status, new combination**, was in *Dyscophellus*

***Euriphellus marian*** (Evans, 1952); **new combination**, was in *Dyscophellus*

***Euriphellus euribates*** (Stoll, 1782)

***Euriphellus polygius*** (Latreille, [1824]); **reinstated status**

**Dyscophellus** Godman & Salvin, 1893 (repl. *Dyscophus* Burmeister); TS: *sebaldus* Stoll

=‡*Dyscophus* Burmeister, 1878 (preoc. *Dyscophus* Grandidier, 1872 [Amphibia]); TS: *sebaldus* Stoll

***Dyscophellus porcius*** (C. Felder & R. Felder, 1862)

*Dyscophellus porcius porcius* (C. Felder & R. Felder, 1862)

*Dyscophellus porcius doriscus* (Hewitson, 1867)

***Dyscophellus sebaldus*** (Stoll, 1781)

***Dyscophellus erythras*** (Mabille, 1888)

***Dyscophellus mielkei*** Austin, 2008

***Dyscophellus diaphorus*** (Mabille & Boulet, 1912)

***Dyscophellus porsena*** (E. Bell, 1934)

***Dyscophellus ramon*** Evans, 1952

***Dyscophellus ramusis*** (Stoll, 1781)

***Dyscophellus damias*** (Plötz, 1882)

**Phareas** Westwood, 1852; TS: *coeleste* Westwood

=‡*Grynopsis* Watson, 1893; TS: *coeleste* Westwood

***Phareas burnsi*** Grishin, 2013

***Phareas coeleste*** Westwood, 1852

## Tribe Eudamini Mabille, 1877

### Subtribe Eudamina Mabille, 1877

**Cecropteris** Herrich-Schäffer, 1869 (repl. *Cecrops* Hübner); TS: *zarex* Hübner

Subgenus *Cecropteris* Herrich-Schäffer, 1869; TS: *zarex* Hübner

=‡*Cecrops* Hübner, 1818 (preoc. *Cecrops* Leach, 1816 [Crustacea]); TS: *zarex* Hübner

=*Paracogia* O. Mielke, 1977; **new synonym**; TS: *acanthopoda* O. Mielke

***Cecropteris acanthopoda*** (O. Mielke, 1977); **new combination**, was in *Paracogia*

***Cecropteris rinta*** (Evans, 1952); **new combination**, was in *Cabares*

***Cecropteris zarex*** (Hübner, 1818); **new combination**, was in *Autochton*

***Cecropteris longipennis*** Plötz, 1882; **new combination**, was in *Autochton*

***Cecropteris evenus*** (Ménétriés, 1855); **new combination**, was in *Urbanus*

Subgenus *Thorybes* Scudder, 1872; TS: *bathyllus* J. E. Smith

=*Achalarus* Scudder, 1872; **new synonym**; TS: =‡*lycidas* J. E. Smith, 1797 (*lyciades* Geyer)

=*Cocceius* Godman & Salvin, 1894; TS: *pylades* Scudder

***Cecropteris lyciades*** (Geyer, 1832); **new combination**, was in *Achalarus*

***Cecropteris casica*** (Herrich-Schäffer, 1869); **new combination**, was in *Achalarus*

***Cecropteris tehucana*** (Draudt, 1922); **new combination**, was in *Achalarus*

***Cecropteris confusis*** (E. Bell, 1923); **new combination**, was in *Thorybes*

***Cecropteris bathyllus*** (J. E. Smith, 1797); **new combination**, was in *Thorybes*

***Cecropteris mexicana*** (Herrich-Schäffer, 1869); **new combination**, was in *Thorybes*

*Cecropteris mexicana aemilea* (Skinner, 1893); **new combination**, was in *Thorybes*

*Cecropteris mexicana blanca* (Scott, 1981); **new combination**, was in *Thorybes*

*Cecropteris mexicana nevada* (Scudder, 1872); **new combination**, was in *Thorybes*

*Cecropteris mexicana dobra* (Evans, 1952); **new combination**, was in *Thorybes*

*Cecropteris mexicana mexicana* (Herrich-Schäffer, 1869); **new combination**, was in *Thorybes*

*Cecropteris mexicana ducia* (Evans, 1952); **new combination**, was in *Thorybes*

***Cecropteris diversus*** (E. Bell, 1927); **new combination**, was in *Thorybes*

***Cecropteris pylades*** (Scudder, 1870); **new combination**, was in *Thorybes*

*Cecropteris pylades indistinctus* (Austin & J. Emmel, 1998); **new combination**, was in *Thorybes*

*Cecropteris pylades albosuffusa* (H. Freeman, 1943); **new combination**, was in *Thorybes*

*Cecropteris pylades pylades* (Scudder, 1870); **new combination**, was in *Thorybes*

***Cecropteris drusius*** (W. H. Edwards, [1884]); **new combination**, was in *Thorybes*

***Cecropteris cincta*** Plötz, 1882; **new combination**, was in *Autochton*

***Cecropteris vectilucis*** (A. Butler, 1872); **new combination**, was in *Autochton*

***Cecropteris pseudocellus*** (Coolidge & Clemence, [1910]); **new combination**, was in *Autochton*

***Cecropteris palliolum*** (H. Druce, 1908); **new combination**, was in *Astraptus*

***Cecropteris egregius*** (A. Butler, 1870); **new combination**, was in *Astraptus*

*Cecropteris egregius egregius* (A. Butler, 1870); **new combination**, was in *Astraptus*

*Cecropteris egregius coxeyi* (R. Williams, 1931); **new combination**, was in *Astraptus*

***Cecropteris virescens*** (Mabille, 1877); **new combination**, was in *Urbanus*

***Cecropteris dorantes*** (Stoll, 1790); **new combination**, was in *Urbanus*

*Cecropteris dorantes calafia* (R. Williams, 1926); **new combination**, was in *Urbanus*

*Cecropteris dorantes dorantes* (Stoll, 1790); **new combination**, was in *Urbanus*

*Cecropteris dorantes cramptoni* (W. Comstock, 1944); **new combination**, was in *Urbanus*

*Cecropteris dorantes santiago* (Lucas, 1857); **new combination**, was in *Urbanus*

*Cecropteris dorantes galapagensis* (F. Williams, 1911); **new combination**, was in *Urbanus*

***Cecropteris obscurus*** (Hewitson, 1867); **new combination**, was in *Urbanus*

Subgenus *Murgaria* Watson, 1893; TS: *albociliatus* Mabille

=*Thessia* Steinhauser, 1989; **new synonym**; TS: *athesis* Hewitson

***Cecropteris albociliatus*** (Mabille, 1877); **new combination**, was in *Achalarus*



*Cecropteris albociliatus albociliatus* (Mabille, 1877); **new combination**, was in *Achalarus*  
*Cecropteris albociliatus leucophrys* (Mabille, 1898); **new combination**, was in *Achalarus*  
*Cecropteris albociliatus nocera* (Plötz, 1882); **new combination**, was in *Achalarus*  
***Cecropteris toxeus*** (Plötz, 1882); **new combination**, was in *Achalarus*  
***Cecropteris jalapus*** (Plötz, 1881); **new combination**, was in *Thessia*  
***Cecropteris athesis*** (Hewitson, 1867); **new combination**, was in *Thessia*  
***Cecropteris phalaeus*** (Godman & Salvin, 1893); **new combination**, was in *Astraptus*  
***Cecropteris reductus*** (N. Riley, 1919); **new combination**, was in *Urbanus*  
***Cecropteris doryssus*** (Swainson, 1831); **new combination**, was in *Urbanus*  
*Cecropteris doryssus chales* (Godman & Salvin, 1893); **new combination**, was in *Urbanus*  
*Cecropteris doryssus doryssus* (Swainson, 1831); **new combination**, was in *Urbanus*  
*Cecropteris doryssus albicuspis* (Herrich-Schäffer, 1869); **new combination**, was in *Urbanus*  
***Cecropteris albimargo*** (Mabille, 1875); **new combination**, was in *Urbanus*  
***Cecropteris takuta*** (Evans, 1952); **new status, new combination**, was in *Urbanus*  
***Cecropteris rica*** (Evans, 1952); **new status, new combination**, was in *Urbanus*  
***Cecropteris trebia*** (Möschler, 1879); **new combination**, was in *Urbanus*  
***Cecropteris carmelita*** (Herrich-Schäffer, 1869); **new combination**, was in *Urbanus*  
***Cecropteris barra*** (Evans, 1952); **new status, new combination**, was in *Urbanus*

***Spicauda*** Grishin, **new genus**; TS: *procne* Plötz

***Spicauda teleus*** (Hübner, 1821); **new combination**, was in *Urbanus*  
***Spicauda tanna*** (Evans, 1952); **new combination**, was in *Urbanus*  
***Spicauda ambiguus*** (de Jong, 1983); **new combination**, was in *Urbanus*  
***Spicauda cindra*** (Evans, 1952); **new combination**, was in *Urbanus*  
***Spicauda zagorus*** (Plötz, 1881); **new combination**, was in *Urbanus*  
***Spicauda simplicius*** (Stoll, 1790); **new combination**, was in *Urbanus*  
***Spicauda procne*** (Plötz, 1881); **new combination**, was in *Urbanus*

***Urbanus*** Hübner, [1807]; TS: *proteus* Linnaeus

Subgenus ***Urbanoides*** Grishin, **new subgenus**; TS: *esmeraldus* A. Butler

***Urbanus esmeraldus*** (A. Butler, 1877)

***Urbanus esma*** Evans, 1952

***Urbanus prodicus*** E. Bell, 1956

***Urbanus elmina*** Evans, 1952

***Urbanus evona*** Evans, 1952

***Urbanus esta*** Evans, 1952

***Urbanus viridis*** H. Freeman, 1970

Subgenus *Urbanus* Hübner, [1807]; TS: *proteus* Linnaeus

=‡*Thymele* [Illiger], 1807 (Suppr. I.C.Z.N. Opinion 232); TS: *proteus* Linnaeus

=†*Goniurus* Hübner, [1819]; TS: *proteus* Linnaeus

=†*Eudamus* Swainson, 1831; TS: *proteus* Linnaeus

=‡*Lyroptera* Plötz, 1881 (nomen nudum); TS: *proteus* Linnaeus

***Urbanus velinus*** (Plötz, 1881)

***Urbanus proteus*** (Linnaeus, 1758)

*Urbanus proteus proteus* (Linnaeus, 1758)

*Urbanus proteus domingo* (Scudder, 1872)

***Urbanus magnus*** Steinhauser, 1981

***Urbanus pronus*** Evans, 1952

***Urbanus pronta*** Evans, 1952

***Urbanus parvus*** Austin, 1998

*Urbanus longicaudus* Austin, 1998  
*Urbanus villus* Austin, 1998  
*Urbanus huancavillcas* (R. Williams, 1926)  
*Urbanus belli* (Hayward, 1935)  
*Urbanus bernikerni* Burns, 2014  
*Urbanus ehakernae* Burns, 2014  
*Urbanus segnestami* Burns, 2014  
*Urbanus viterboana* (Ehrmann, 1907)  
*Urbanus dubius* Steinhauser, 1981  
*Urbanus megalurus* (Mabille, 1877); **new combination**, was in *Astraptus*  
*Urbanus tucuti* (R. Williams, 1927); **new combination**, was in *Astraptus*

**Telegonus** Hübner, [1819]; TS: *talus* Cramer

Subgenus *Telegonus* Hübner, [1819]; TS: *talus* Cramer

=*Euthymele* Mabille, 1878; TS: =*mercatus* Fabricius, 1793 (*fulgerator* Walch)

*Telegonus brevicauda* (Plötz, 1886); **new combination**, was in *Astraptus*  
*Telegonus chalco* (Hübner, 1823); **new combination**, was in *Urbanus*  
*Telegonus fulgerator* (Walch, 1775); **new combination**, was in *Astraptus*  
*Telegonus catemacoensis* (H. Freeman, 1967); **reinstated status, new combination**, was in *Astraptus*  
*Telegonus azul* (Reakirt, [1867]); **reinstated status, new combination**, was in *Astraptus*  
*Telegonus fulgor* Hayward, 1939; **new combination**, was in *Astraptus*  
*Telegonus naxos* (Hewitson, 1867); **new combination**, was in *Astraptus*  
*Telegonus christyi* Sharpe, 1898; **new combination**, was in *Astraptus*  
*Telegonus xagua* (Lucas, 1857); **new combination**, was in *Astraptus*  
*Telegonus xagua harveyi* (Clench, Steinhauser and J. Miller, 2017); **new combination**, was in *Astraptus*  
*Telegonus xagua xagua* (Lucas, 1857); **new combination**, was in *Astraptus*  
*Telegonus talus* (Cramer, 1777); **new combination**, was in *Astraptus*  
*Telegonus apastus* (Cramer, 1777); **new combination**, was in *Astraptus*  
*Telegonus apastus apastus* (Cramer, 1777); **new combination**, was in *Astraptus*  
*Telegonus apastus pusa* (Evans, 1952); **new combination**, was in *Astraptus*

Subgenus *Rhabdoides* Scudder, 1889; TS: *cellus* Boisduval & Le Conte

*Telegonus elorus* (Hewitson, 1867); **new combination**, was in *Astraptus*  
*Telegonus alardus* (Stoll, 1790); **new combination**, was in *Astraptus*  
*Telegonus alardus latia* (Evans, 1952); **new combination**, was in *Astraptus*  
*Telegonus alardus aquila* (Evans, 1952); **new combination**, was in *Astraptus*  
*Telegonus alardus alardus* (Stoll, 1790); **new combination**, was in *Astraptus*  
*Telegonus habana* (Lucas, 1857); **new combination**, was in *Astraptus*  
*Telegonus heriul* Mabille & Boulet, 1912; **reinstated status, new combination**, was in *Astraptus*  
*Telegonus alector* (C. Felder & R. Felder, 1867); **new combination**, was in *Astraptus*  
*Telegonus alector hopfferi* (Plötz, 1881); **new combination**, was in *Astraptus*  
*Telegonus alector alector* (C. Felder & R. Felder, 1867); **new combination**, was in *Astraptus*  
*Telegonus cretatus* Hayward, 1939; **new combination**, was in *Astraptus*  
*Telegonus cretatus cretatus* Hayward, 1939; **new combination**, was in *Astraptus*  
*Telegonus cretatus adoba* (Evans, 1952); **new combination**, was in *Astraptus*  
*Telegonus creteus* (Cramer, 1780); **new combination**, was in *Astraptus*  
*Telegonus creteus crana* (Evans, 1952); **new combination**, was in *Astraptus*  
*Telegonus creteus crilla* (Evans, 1952); **new combination**, was in *Astraptus*  
*Telegonus creteus cyprus* (Evans, 1952); **new combination**, was in *Astraptus*  
*Telegonus creteus creteus* (Cramer, 1780); **new combination**, was in *Astraptus*  
*Telegonus creteus siges* Mabille, 1903; **new combination**, was in *Astraptus*

***Telegonus bifascia*** (Herrich-Schäffer, 1869); **new combination**, was in *Astraptus*  
***Telegonus latimargo*** (Herrich-Schäffer, 1869); **new combination**, was in *Astraptus*  
***Telegonus tinda*** (Evans, 1952); **new combination**, was in *Astraptus*  
***Telegonus chiriquensis*** Staudinger, 1876; **new combination**, was in *Astraptus*  
*Telegonus chiriquensis chiriquensis* (Staudinger, 1876); **new combination**, was in *Astraptus*  
*Telegonus chiriquensis erana* (Evans, 1952); **new combination**, was in *Astraptus*  
*Telegonus chiriquensis meretrix* (Hewitson, 1876); **new combination**, was in *Astraptus*  
*Telegonus chiriquensis oenander* (Hewitson, 1876); **new combination**, was in *Astraptus*  
***Telegonus weymeri*** (Plötz, 1882); **new combination**, was in *Astraptus*  
***Telegonus jaira*** (A. Butler, 1870); **new combination**, was in *Astraptus*  
***Telegonus cassander*** (Fabricius, 1793); **new combination**, was in *Astraptus*  
***Telegonus galesus*** Mabille, 1888; **new combination**, was in *Astraptus*  
***Telegonus cassius*** (Evans, 1952); **new status, new combination**, was in *Astraptus*  
***Telegonus anaphus*** (Cramer, 1777); **new combination**, was in *Astraptus*  
*Telegonus anaphus annetta* (Evans, 1952); **new combination**, was in *Astraptus*  
*Telegonus anaphus anaphus* (Cramer, 1777); **new combination**, was in *Astraptus*  
*Telegonus anaphus anoma* (Evans, 1952); **new combination**, was in *Astraptus*  
*Telegonus anaphus aniza* (Evans, 1952); **new combination**, was in *Astraptus*  
*Telegonus anaphus anausis* Godman & Salvin, 1896; **new combination**, was in *Astraptus*  
***Telegonus hyster*** (Dyar, 1916); **new combination**, was in "*Codatractus*"  
***Telegonus cellus*** (Boisduval & Le Conte, [1837]); **new combination**, was in *Autochton*  
***Telegonus siernador*** (Burns, 1984); **new combination**, was in *Autochton*

***Autochton*** Hübner, 1823; TS: *itylus* Hübner

Subgenus *Autochton* Hübner, 1823; TS: *itylus* Hübner

=*Cabares* Godman & Salvin, 1894; **new synonym**; TS: *potrillo* Lucas

***Autochton sulfureolus*** (Mabille, 1883)

***Autochton reflexus*** (Mabille & Boulet, 1912)

***Autochton neis*** (Geyer, 1832)

***Autochton integrifascia*** (Mabille, 1891)

***Autochton itylus*** Hübner, 1823

***Autochton bipunctatus*** (Gmelin, [1790])

***Autochton potrillo*** (Lucas, 1857); **new combination**, was in *Cabares*

*Autochton potrillo potrillo* (Lucas, 1857); **new combination**, was in *Cabares*

*Autochton potrillo reducta* (Mabille & Boulet, 1919); **new combination**, was in *Cabares*

Subgenus *Calliades* Mabille & Boulet, 1912; **new status**; TS: =*phrynicus* Hewitson, 1867 (*oryx* C. & R. Felder)

***Autochton oryx*** (C. Felder & R. Felder, 1862); **new combination**, was in *Calliades*

***Spathilepia*** A. Butler, 1870; TS: *clonius* Cramer

***Spathilepia clonius*** (Cramer, 1775)

***Astraptus*** Hübner, [1819]; TS: =‡*aulestes* Cramer, 1780 (*janeira* Schaus)

***Astraptus erycina*** (Plötz, 1881)

***Astraptus mabillei*** Steinhauser, 1989

***Astraptus halesius*** (Hewitson, 1877)

***Astraptus aulus*** (Plötz, 1881)

***Astraptus enotrus*** (Stoll, 1781)

***Astraptus janeira*** (Schaus, 1902)

***Narcosius*** Steinhauser, 1986; TS: *narcosius* Stoll

*Narcosius colossus* (Herrich-Schäffer, 1869)  
*Narcosius granadensis* (Möschler, 1879); **reinstated status**  
*Narcosius dosula* (Evans, 1952)  
*Narcosius hercules* (E. Bell, 1956)  
*Narcosius steinhauseri* Austin, 1996  
*Narcosius narcosius* (Stoll, 1790)  
*Narcosius aulina* (Evans, 1952)  
*Narcosius helen* (Evans, 1952); **new status**  
*Narcosius parisi* (R. Williams, 1927)  
*Narcosius odysseus* Austin, 1996  
*Narcosius mura* (R. Williams, 1927)  
*Narcosius pseudomura* Austin, 1996  
*Narcosius nazaraeus* Steinhauser, 1986  
*Narcosius samson* (Evans, 1952)

*Proteides* Hübner, [1819]; TS: *mercurius* Fabricius  
=*Dicranaspis* Mabille, 1878; TS: =*†idas* Cramer, [1779] (*mercurius* Fabricius)  
*Proteides mercurius* (Fabricius, 1787)  
*Proteides mercurius mercurius* (Fabricius, 1787)  
*Proteides mercurius sanantonio* (Lucas, 1857)  
*Proteides mercurius sanchesii* E. Bell & W. Comstock, 1948  
*Proteides mercurius jamaicensis* Skinner, 1920  
*Proteides mercurius pedro* (Dewitz, 1877)  
*Proteides mercurius vincenti* E. Bell & W. Comstock, 1948  
*Proteides mercurius angasi* Godman & Salvin, 1884  
*Proteides mercurius grenadensis* Enrico & Pinchon, 1969  
*Proteides maysi* (Lucas, 1857)

*Epargyreus* Hübner, [1819]; TS: =*tityrus* Fabricius, 1775 (*clarus* Cramer)  
=*Eridamus* Burmeister, 1875; TS: *tmolis* Burmeister  
*Epargyreus zestos* (Geyer, 1832)  
*Epargyreus zestos zestos* (Geyer, 1832)  
*Epargyreus zestos inaguarum* Clench & Bjorndal, 1980  
*Epargyreus clarus* (Cramer, 1775)  
*Epargyreus clarus californicus* MacNeill, 1975  
*Epargyreus clarus clarus* (Cramer, 1775)  
*Epargyreus clarus huachuca* Dixon, 1955  
*Epargyreus clarus profugus* Austin, 1998  
*Epargyreus antaeus* (Hewitson, 1867)  
*Epargyreus spanna* Evans, 1952  
*Epargyreus orizaba* Scudder, 1872; **reinstated status**  
*Epargyreus dicta* Evans, 1952; **new status**  
*Epargyreus socus* (Hübner, [1825])  
*Epargyreus socus chota* Evans, 1952  
*Epargyreus socus sinus* Evans, 1952  
*Epargyreus socus socus* (Hübner, [1825])  
*Epargyreus pseudexadeus* Westwood, 1852; **reinstated status**  
*Epargyreus windi* H. Freeman, 1969  
*Epargyreus cruza* Evans, 1952; **new status**  
*Epargyreus exadeus* (Cramer, 1780)  
*Epargyreus nutra* Evans, 1952

***Epargyreus aspina*** Evans, 1952  
***Epargyreus spina*** Evans, 1952  
*Epargyreus spina spina* Evans, 1952  
*Epargyreus spina verruga* Evans, 1952  
***Epargyreus spinta*** Evans, 1952  
***Epargyreus spinosa*** Evans, 1952  
***Epargyreus clavicornis*** (Herrich-Schäffer, 1869)  
*Epargyreus clavicornis gaumeri* Godman & Salvin, 1893  
*Epargyreus clavicornis tenda* Evans, 1955  
*Epargyreus clavicornis clavicornis* (Herrich-Schäffer, 1869)  
***Epargyreus brodkorbi*** H. Freeman, 1969  
***Epargyreus deleoni*** H. Freeman, 1977  
***Epargyreus tmolis*** (Burmeister, 1875)  
***Epargyreus barisses*** (Hewitson, 1874)  
*Epargyreus barisses barisses* (Hewitson, 1874)  
*Epargyreus barisses argentina* Mabille, 1903  
***Epargyreus enispe*** (Hewitson, 1867)  
*Epargyreus enispe elta* Evans, 1952  
*Epargyreus enispe enispe* (Hewitson, 1867)

***Chioides*** Lindsey, 1921; TS: *albofasciatus* Hewitson  
***Chioides albofasciatus*** (Hewitson, 1867)  
***Chioides catillus*** (Cramer, 1780)  
*Chioides catillus albius* Evans, 1952  
*Chioides catillus catillus* (Cramer, 1780)  
*Chioides catillus jethira* (A. Butler, 1870)  
***Chioides churchi*** E. Bell & W. Comstock, 1948  
***Chioides cinereus*** (Mabille & Vuillot, 1891)  
***Chioides concinnus*** (Mabille, 1877)  
***Chioides vintra*** Evans, 1952  
***Chioides iverna*** Evans, 1952  
***Chioides zilpa*** (A. Butler, 1872)  
***Chioides ixion*** (Plötz, 1881)  
***Chioides marmorosa*** (Herrich-Schäffer, 1865)

**Subtribe Loboclina Grishin, new subtribe**

***Aguna*** R. Williams, 1927; TS: *camagura* R. Williams  
=‡*Tmetocerus* Poujade, 1895 (preocc. *Tmetocerus* Hartert, 1891 [Aves]); TS: *asander* Hewitson  
***Aguna megaeles*** (Mabille, 1888)  
*Aguna megaeles malia* Evans, 1952  
*Aguna megaeles megaeles* (Mabille, 1888)  
***Aguna metophis*** (Latreille, [1824])  
***Aguna camagura*** (R. Williams, 1926)  
***Aguna asander*** (Hewitson, 1867)  
*Aguna asander asander* (Hewitson, 1867)  
*Aguna asander haitensis* (Mabille & Boulet, 1912)  
*Aguna asander jasper* Evans, 1952  
***Aguna albistria*** (Plötz, 1880)  
*Aguna albistria albistria* (Plötz, 1880)  
*Aguna albistria leucogramma* (Mabille, 1888)  
***Aguna claxon*** Evans, 1952

***Aguna prasinus*** Siewert, Leviski, O. Mielke & Casagrande, 2015

***Aguna clina*** Evans, 1952

***Aguna latifascia*** Austin & O. Mielke, 1998

***Aguna coelus*** (Stoll, 1781)

***Aguna cirrus*** Evans, 1952

***Aguna coeloides*** Austin & O. Mielke, 1998

***Aguna nicolayi*** Austin & O. Mielke, 1998

***Aguna venezuelae*** O. Mielke, 1971

***Aguna latimacula*** Austin & O. Mielke, 1998

***Aguna aurunce*** (Hewitson, 1867)

*Aguna aurunce aurunce* (Hewitson, 1867)

*Aguna aurunce hypozonius* (Plötz, 1881)

***Aguna glaphyrus*** (Mabille, 1888)

***Aguna penicillata*** Austin & O. Mielke, 1998

***Aguna spicata*** Austin & O. Mielke, 1998

***Aguna longicauda*** Austin & O. Mielke, 1998

***Aguna ganna*** (Möschler, 1879)

***Aguna panama*** Austin & O. Mielke, 1998

***Aguna spatulata*** Austin & O. Mielke, 1998

***Aguna similis*** Austin & O. Mielke, 1998

***Aguna mesodentata*** Austin & O. Mielke, 1998

***Aguna squamalba*** Austin & O. Mielke, 1998

***Aguna parva*** Austin & O. Mielke, 1998

***Zeutus*** Grishin, **new genus**; TS: *zeutus* Möschler

***Zeutus zeutus*** (Möschler, 1879); **new combination**, was in *Calliades*

***Lobocla*** Moore, 1884; TS: *liliana* Atkinson

***Lobocla liliana*** (Atkinson, 1871)

*Lobocla liliana ignatius* (Plötz, 1882)

*Lobocla liliana liliana* (Atkinson, 1871)

***Lobocla aborica*** (Tytler, 1915)

*Lobocla aborica aborica* (Tytler, 1915)

*Lobocla aborica zesta* Evans, 1949

*Lobocla aborica tonka* Evans, 1949

***Lobocla quadripunctata*** Fan & Wang, 2004

***Lobocla disparalis*** Murayama, 1995

***Lobocla bifasciatus*** (Bremer & Grey, 1853)

***Lobocla contractus*** (Leech, 1894)

***Lobocla germanus*** (Oberthür, 1886)

***Lobocla nepos*** (Oberthür, 1886)

*Lobocla nepos nepos* (Oberthür, 1886)

*Lobocla nepos phyllis* (Hemming, 1933)

***Lobocla proximus*** (Leech, 1891)

***Lobocla simplex*** (Leech, 1891)

***Lobotractus*** Grishin, **new genus**; TS: *valeriana* Plötz

***Lobotractus valeriana*** (Plötz, 1881); **new combination**, was in *Codattractus*

***Lobotractus uvydixa*** (Dyar, 1914); **new combination**, was in *Codattractus*

***Lobotractus cyda*** (Godman, 1901); **new combination**, was in *Codattractus*

**Codattractus** Lindsey, 1921 (repl. *Heteropia* Mabilles); TS: =*imitatrix* Mabilles, 1889 (*imalena* A. Butler)  
 Subgenus **Codattractus** Lindsey, 1921; TS: =*imitatrix* Mabilles, 1889 (*imalena* A. Butler)  
 =‡*Heteropia* Mabilles, 1889 (preocc. *Heteropia* Carter, 1886 [Porifera]); TS: =*imitatrix* Mab. (*imalena* A. Butler)  
**Codattractus cyledis** (Dyar, 1912)  
**Codattractus bryaxis** (Hewitson, 1867)  
**Codattractus imalena** (A. Butler, 1872)  
**Codattractus arizonensis** (Skinner, 1905)  
**Codattractus sallyae** A. Warren, 1995  
**Codattractus melon** (Godman & Salvin, 1893)

Subgenus **Caudattractus** Grishin, new subgenus; TS: *alcaeus* Hewitson, 1867  
**Codattractus carlos** Evans, 1952  
**Codattractus rowena** Evans, 1952; new status  
*Codattractus rowena rowena* Evans, 1952  
*Codattractus rowena arguta* Evans, 1952; new combination  
**Codattractus alcaeus** (Hewitson, 1867)  
**Codattractus apulia** Evans, 1952; new status  
**Codattractus yucatanus** H. Freeman, 1977  
**Codattractus aminias** (Hewitson, 1867)

**Zestusa** Lindsey, 1925 (repl. *Plestia* Mabilles); TS: *staudingeri* Mabilles  
 =‡*Plestia* Mabilles, 1888 (preocc. *Plestia* Stål, 1871 [Hemiptera]); TS: *staudingeri* Mabilles  
**Zestusa dorus** (W. H. Edwards, 1882)  
**Zestusa elwesi** (Godman & Salvin, 1893)  
**Zestusa staudingeri** (Mabilles, 1888)  
**Zestusa levona** Steinhäuser, 1972

**Ridens** Evans, 1952; TS: *ridens* Hewitson  
**Ridens crison** (Godman & Salvin, 1893)  
*Ridens crison crison* (Godman & Salvin, 1893)  
*Ridens crison howarthi* Steinhäuser, 1974  
*Ridens crison cachinnans* (Godman, 1901)  
**Ridens ridens** (Hewitson, 1876)  
**Ridens fieldi** Steinhäuser, 1974  
**Ridens toddi** Steinhäuser, 1974  
**Ridens biolleyi** (Mabilles, 1900)  
**Ridens mercedes** Steinhäuser, 1983  
**Ridens panche** (R. Williams, 1927)  
**Ridens telegonoides** (Mabilles & Bouillet, 1912)  
**Ridens tristis** (Draudt, [1922])  
**Ridens nora** Evans, 1952  
**Ridens harpagus** (C. Felder & R. Felder, 1867)  
**Ridens philistus** (Hopffer, 1874)  
*Ridens philistus philistus* (Hopffer, 1874)  
*Ridens philistus philia* Evans, 1952  
**Ridens mephitis** (Hewitson, 1876)  
**Ridens fulminans** (Herrich-Schäffer, 1869)  
**Ridens fulima** Evans, 1952  
**Ridens pacasa** (R. Williams, 1927)  
**Ridens bidens** Austin, 1998  
**Ridens allyni** H. Freeman, 1979

*Ridens bridgmani* (Weeks, 1902)  
*Ridens miltas* (Godman & Salvin, 1893)

*Venada* Evans, 1952; TS: *advena* Mabille  
*Venada nevada* Burns, 2005  
*Venada advena* (Mabille, 1889)  
*Venada daneva* Burns, 2005  
*Venada lamella* Burns, 2013  
*Venada cacao* Burns, 2005  
*Venada naranja* Burns, 2005

#### Subtribe Cephisina Grishin, new subtribe

*Cephise* Evans, 1952; TS: *cephise* Herrich-Schäffer  
*Cephise impunctus* Austin & O. Mielke, 2000  
*Cephise cephise* (Herrich-Schäffer, 1869)  
*Cephise nuspesez* Burns, 1996  
*Cephise malesedis* Austin & O. Mielke, 2000  
*Cephise maculatus* Austin & O. Mielke, 2000  
*Cephise burnsi* Austin & O. Mielke, 2000  
*Cephise mexicanus* Austin & O. Mielke, 2000  
*Cephise glarus* (Mabille, 1888)  
*Cephise aelius* (Plötz, 1881)  
*Cephise callias* (Mabille, 1888)  
*Cephise procerus* (Plötz, 1881)  
*Cephise guatemalaensis* (H. Freeman, 1977)

#### Subtribe Telemiadina Grishin, new subtribe

*Ectomis* Mabille, 1878; TS: =*adoxa* Mabille, 1878 (*cythna* Hewitson)  
Subgenus *Asina* Grishin, new subgenus; TS: *asine* Hewitson  
*Ectomis gyges* (Evans, 1952); new combination, was in *Polythrix*  
*Ectomis hirtius* (A. Butler, 1870); new combination, was in *Polythrix*  
*Ectomis roma* (Evans, 1952); new combination, was in *Polythrix*  
*Ectomis asine* (Hewitson, 1867); new combination, was in *Polythrix*  
*Ectomis mexicanus* (H. Freeman, 1969); new combination, was in *Polythrix*  
Subgenus *Ectomis* Mabille, 1878; TS: =*adoxa* Mabille, 1878 (*cythna* Hewitson)  
=*Hypocryptothrix* E. Watson, 1893; new synonym; TS: *teutas* Hewitson  
=*Polythrix* E. Watson, 1893; new synonym; TS: *metallescens* Mabille  
=*Chrysoplectrum* E. Watson, 1893; new synonym; TS: *otriades* Hewitson  
=*Heronia* Mabille & Boulet, 1912; new synonym; TS: *labriaris* A. Butler  
=*Basslerodea* Bell, 1940; TS: =*mida* Bell, 1940 (*cythna* Hewitson)  
=*Speculum* Austin, 2008; new synonym; TS: *speculum* Austin, 2008  
*Ectomis octomaculata* (Sepp, [1844]); new combination, was in *Polythrix*  
*Ectomis maizae* (Hellebuyck, 1998); new combination, was in *Polythrix*  
*Ectomis ceculus* (Herrich-Schäffer, 1869); new combination, was in *Polythrix*  
*Ectomis caunus* (Herrich-Schäffer, 1869); new combination, was in *Polythrix*  
*Ectomis auginus* (Hewitson, 1867); new combination, was in *Polythrix*  
*Ectomis metallescens* (Mabille, 1888); new combination, was in *Polythrix*  
*Ectomis kanshul* (Shuey, 1991); new combination, was in *Polythrix*  
*Ectomis eudoxus* (Stoll, 1781); new combination, was in *Polythrix*  
*Ectomis minvanes* (R. Williams, 1926); new combination, was in *Polythrix*



***Ectomis labriaris*** (A. Butler, 1877); **new combination**, was in *Heronia*  
***Ectomis cythna*** (Hewitson, 1878)  
*Ectomis cythna cythna* (Hewitson, 1878)  
*Ectomis cythna ega* Evans, 1953  
***Ectomis speculum*** (Austin, 2008); **new combination**, was in *Speculum*  
***Ectomis teutas*** (Hewitson, 1876); **new combination**, was in *Hypocryptothrix*  
***Ectomis pervivax*** (Hübner, [1819]); **new combination**, was in *Chrysoplectrum*  
***Ectomis bahiana*** (Herrich-Schäffer, 1869); **new combination**, was in *Chrysoplectrum*  
***Ectomis orphne*** (Plötz, 1881); **new combination**, was in *Chrysoplectrum*  
***Ectomis otriades*** (Hewitson, 1867); **new combination**, was in *Chrysoplectrum*  
***Ectomis epicincea*** (A. Butler & H. Druce, 1872); **new combination**, was in *Chrysoplectrum*  
***Ectomis perniciosus*** (Herrich-Schäffer, 1869); **new combination**, was in *Chrysoplectrum*  
***Ectomis cuminaensis*** (R.F. d'Almeida, 1976); **new combination**, was in *Chrysoplectrum*  
***Ectomis orpheus*** (Plötz, 1881); **new combination**, was in *Chrysoplectrum*  
***Ectomis perna*** (Evans, 1952); **new combination**, was in *Chrysoplectrum*  
***Ectomis albovenae*** (E. Bell, 1932); **new combination**, was in *Chrysoplectrum*

***Telemiades*** Hübner, [1819]; TS: *avitus* Stoll  
 =*Pyrdalus* Mabille, 1903; TS: *corbulo* Stoll  
***Telemiades delalande*** (Latreille, [1824])  
***Telemiades litanicus*** (Hewitson, 1876)  
***Telemiades vansa*** Evans, 1953  
***Telemiades gallius*** (Mabille, 1888)  
***Telemiades chysorrhoea*** (Godman & Salvin, 1893)  
***Telemiades contra*** Evans, 1953; **new status**  
***Telemiades centrites*** (Hewitson, 1870)  
***Telemiades vespasius*** (Fabricius, 1793)  
***Telemiades squanda*** Evans, 1953  
***Telemiades trenda*** Evans, 1953  
***Telemiades nicomedes*** (Möschler, 1879)  
***Telemiades meris*** (Plötz, 1886)  
***Telemiades brazus*** E. Bell, 1949; **reinstated status**  
***Telemiades choricus*** (Schaus, 1902)  
***Telemiades megallus*** Mabille, 1888  
***Telemiades sila*** Evans, 1953  
***Telemiades epicalus*** Hübner, [1819]  
***Telemiades penidas*** (Hewitson, 1867)  
***Telemiades avitus*** (Stoll, 1781)  
***Telemiades antiope*** (Plötz, 1882)  
*Telemiades antiope antiope* (Plötz, 1882)  
*Telemiades antiope toska* Evans, 1953  
***Telemiades fides*** E. Bell, 1949  
***Telemiades amphion*** (Geyer, 1832)  
*Telemiades amphion pekahia* (Hewitson, 1868)  
*Telemiades amphion amphion* (Geyer, 1832)  
*Telemiades amphion misitheus* Mabille, 1888  
*Telemiades amphion marpesus* (Hewitson, 1876)  
***Telemiades laogonus*** (Hewitson, 1876)  
*Telemiades laogonus nicola* (Plötz, 1882)  
*Telemiades laogonus laogonus* (Hewitson, 1876)  
***Telemiades corbulo*** (Stoll, 1781)

*Telemiades oiclus* (Mabille, 1889)

**Polygonus** Hübner, [1825]; TS: =*lividus* Hübner, [1825] (*leo* Gmelin)

=‡*Acolastus* Scudder, 1872 (preocc. *Acolastus* Gerstaecker, 1855 [Coleoptera]); TS: *savigny* Latreille

=‡*Nennius* Kirby, [1902] (repl. *Polygonus* Hübner); TS: =*lividus* Hübner, [1825] (*leo* Gmelin)

**Polygonus leo** (Gmelin, [1790])

*Polygonus leo arizonensis* (Skinner, 1911)

*Polygonus leo pallida* Röber, 1925

*Polygonus leo histrio* Röber, 1925

*Polygonus leo leo* (Gmelin, [1790])

*Polygonus leo hagar* Evans, 1952

**Polygonus savigny** (Latreille, [1824])

*Polygonus savigny savigny* (Latreille, [1824])

*Polygonus savigny punctus* E. Bell & W. Comstock, 1948

### Tribe Oileidini Grishin, new tribe

#### Subtribe Oileidina Grishin

**Oileides** Hübner, [1825]; TS: *vulpinus* Hübner

=‡*Ablepsis* Watson, 1893; TS: *vulpinus* Hübner

**Oileides fenestratus** (Gmelin, [1790])

**Oileides guyanensis** (Mabille & Boulet, 1912); reinstated status

**Oileides vulpinus** Hübner, [1825]

**Oileides amazonensis** (E. Bell, 1947)

*Oileides amazonensis amazonensis* (E. Bell, 1947)

*Oileides amazonensis renta* (Evans, 1952)

### Subtribe Typhedanina Grishin, new subtribe

**Typhedanus** A. Butler, 1870; TS: =*zephus* Butler, 1870 (*umber* Herrich-Schäffer)

**Typhedanus umber** (Herrich-Schäffer, 1869)

**Typhedanus ampyx** (Godman & Salvin, 1893)

**Typhedanus salas** H. Freeman, 1977

**Typhedanus cajeta** (Herrich-Schäffer, 1869); new combination, was in *Cogia*

*Typhedanus cajeta cajeta* (Herrich-Schäffer, 1869); new combination, was in *Cogia*

*Typhedanus cajeta eluina* (Godman & Salvin, 1894); new combination, was in *Cogia*

**Typhedanus aventinus** (Godman & Salvin, 1894); new combination, was in *Cogia*

**Typhedanus mala** (Evans, 1953); new combination, was in *Cogia*

**Typhedanus buena** (A. Warren, Dolibaina & Hernández-Mejía, 2015); new combination, was in *Cogia*

**Oechydus** E. Watson, 1893; TS: *chersis* Herrich-Schäffer

**Oechydus chersis** (Herrich-Schäffer, 1869)

*Oechydus chersis chersis* (Herrich-Schäffer, 1869)

*Oechydus chersis ochrilinea* (Schaus, 1902)

*Oechydus chersis rufus* Evans, 1953

**Oechydus evelinda** (A. Butler, 1870); reinstated status

**Cogia** A. Butler, 1870; TS: *hassan* A. Butler

=*Phoedinus* Godman & Salvin, 1894; TS: *caicus* Herrich-Schäffer

=‡*Anaperus* Mabille & Boulet, 1919 (preocc. *Anaperus* Tröschel, 1846 [Echinodermata]); TS: *caicus* H.-S.

=‡*Caicella* Hemming, 1934 (repl. *Phoedinus* Godman & Salvin); TS: *caicus* Herrich-Schäffer

**Cogia crameri** (McHenry, 1960); new combination, was in *Typhedanus*

**Cogia undulatus** (Hewitson, 1867); new combination, was in *Typhedanus*

**Cogia galbula** (Plötz, 1881); **new combination**, was in *Typhedanus*  
**Cogia optica** (Evans, 1952); **new combination**, was in *Typhedanus*  
**Cogia goya** (Evans, 1952); **new status, new combination**, was in *Typhedanus*  
**Cogia stylites** (Herrich-Schäffer, 1869); **new combination**, was in *Typhedanus*  
**Cogia cursinoides** (O. Mielke, 1979); **new combination**, was in *Typhedanus*  
**Cogia eliasi** (O. Mielke, 1979); **new combination**, was in *Typhedanus*  
**Cogia aziris** (Hewitson, 1867); **new combination**, was in *Typhedanus*  
**Cogia hassan** A. Butler, 1870  
    *Cogia hassan hassan* A. Butler, 1870  
    *Cogia hassan evansi* E. Bell, 1937  
**Cogia abdul** Hayward, 1947  
**Cogia troilus** Mabille, 1898  
**Cogia punctilia** Plötz, 1882  
**Cogia cerradicola** (O. Mielke, 1967)  
**Cogia outis** (Skinner, 1894)  
**Cogia hippalus** (W. H. Edwards, 1882)  
    *Cogia hippalus peninsularis* L. Miller & MacNeill, 1969  
    *Cogia hippalus hippalus* (W. H. Edwards, 1882)  
    *Cogia hippalus hiska* Evans, 1953  
    *Cogia hippalus hester* Evans, 1953  
**Cogia azila** Evans, 1953  
**Cogia caicus** (Herrich-Schäffer, 1869)  
    *Cogia caicus moschus* (W. H. Edwards, 1882)  
    *Cogia caicus caicus* (Herrich-Schäffer, 1869)  
**Cogia calchas** (Herrich-Schäffer, 1869)  
**Cogia grandis** N. Riley, 1921  
**Cogia elaites** (Hewitson, 1867)

**Nerula** Mabille, 1888; TS: =*nautes* Mabille, 1888 (*fibrena* Hewitson)  
    **Nerula fibrena** (Hewitson, 1877)  
    **Nerula tuba** Evans, 1953

**Marela** Mabille, 1903; TS: *tamyroides* C. Felder & R. Felder  
    **Marela tamyroides** (C. Felder & R. Felder, 1867)  
    **Marela tamyris** Mabille, 1903  
    **Marela tamba** Evans, 1953; **new status**

---

Removed from Eudaminae to Pyrginae: Achlyodini: Achlyodina

**Cabirus** Hübner, [1819]  
    **Cabirus procas** (Cramer, 1777)  
        *Cabirus procas procas* (Cramer, 1777)  
        *Cabirus procas junta* Evans, 1952  
        *Cabirus procas purda* Evans, 1952

## T6. Systematic list of Eudaminae prior to this publication

The list is maintained at the Butterflies of America website:

Warren AD, Davis KJ, Stangeland EM, Pelham JPP, Willmott KR, Grishin NV. 2013. Illustrated Lists of American Butterflies. [21-XI-2017] <<http://www.butterfliesofamerica.com/L/Hesperiidae.htm>> (accessed on March 2, 2019),

which is based on:

Mielke OHH. 2004. HesperIIDae, pp. 25-86. In: Lamas, G. (Ed.), Checklist: Part 4A. Hesperioidea - Papilionoidea. In: Heppner, J. B. (Ed.), Atlas of Neotropical Lepidoptera. Volume 5A. Gainesville, Association for Tropical Lepidoptera; Scientific Publishers;

Mielke OHH. 2005. Catalogue of the American Hesperioidea: HesperIIDae (Lepidoptera). Curitiba, Sociedade Brasileira de Zoologia. 1: xiii + 125 pp.; 2: [ii] + 127-410; 3: [ii] + 411-771; 4: [ii] + 773-1055; 5: [ii] + 1057-1383; 6: [ii] + 1385-1536;

Evans WH. 1949. A Catalogue of the HesperIIDae from Europe, Asia, and Australia in the British Museum (Natural History). London, British Museum (Natural History). xix + 502 pp., 53 pls. (for *Lobocla*);

Warren AD, Ogawa JR, Brower AVZ. 2009. "Revised classification of the family HesperIIDae (Lepidoptera: Hesperioidea) based on combined molecular and morphological data." *Systematic Entomology* **34**(3): 467-523,

with modifications and updates from:

Murayama S. 1995. Description of 3 new species and 5 new races of Chinese butterflies from Yunnan Province [in Japanese]. "Konchu to Shizen" (*Insects and Nature*) **30**(14): 32-35 (for *Lobocla*);

Fan ZL, Wang M. 2004. Notes on the genus *Lobocla* Moore with description of a new species (Lepidoptera: HesperIIDae). *Acta Zootaxonomica Sinica* **29**(3): 523-526 (for *Lobocla*);

Burns JM, Janzen DH. 2005. Pan-Neotropical genus *Venada* (HesperIIDae: Pyrginae) is not monotypic: Four new species occur on one volcano in the Area de Conservación Guanacaste, Costa Rica. *Journal of the Lepidopterists' Society* **59**(1): 19-34;

Austin GT. 2008. HesperIIDae of Rondônia, Brazil: Taxonomic comments on "night" skippers, with descriptions of new genera and species (Lepidoptera: Eudaminae). *Insecta Mundi* **29**: 1-36;

Austin GT, Mielke OHH. 2008. HesperIIDae of Rondônia, Brazil: *Porphyrogenes* Watson (Lepidoptera: Pyrginae: Eudamini), with descriptions of new species from Central and South America. *Insecta Mundi* **44**: 1-56;

Burns JM, Janzen DH, Hallwachs WD. 2010. Of many similar species in the Neotropical genus *Porphyrogenes* (Lepidoptera: HesperIIDae), a new one, repeatedly reared in Costa Rica, is relatively distinct. *Proceedings of the Entomological Society of Washington* **112**(1): 32-42;

Grishin NV. 2012. A new species of *Entheus* from Ecuador (Lepidoptera, HesperIIDae, Eudaminae). *Tropical Lepidoptera Research* **22**(1): 24-28;

Burns JM, Janzen DH, Hallwachs WD, Hajibabaei M. 2013. DNA barcodes reveal yet another new species of *Venada* (Lepidoptera: HesperIIDae) in northwestern Costa Rica. *Proceedings of the Entomological Society of Washington* **115**(1): 37-47;

Grishin NV. 2013. A new *Entheus* (HesperIIDae: Eudaminae) from Colombia and Panama is most distinctive in the *E. gentius* group. *Journal of Research on the Lepidoptera* **46**: 91-103;

Bertrand C, Janzen DH, Hallwachs WD, Burns JM, Gibson JF, Shokralla S, Hajibabaei M. 2014. Mitochondrial and nuclear phylogenetic analysis with Sanger and next-generation sequencing shows that, in Área de Conservación Guanacaste, northwestern Costa Rica, the skipper butterfly named *Urbanus belli* (family HesperIIDae) comprises three morphologically cryptic species. *BMC evolutionary Biology* **14**(153): 1-18;

- Siewert RR, Leviski GL, Mielke OHH, and Casagrande MM. 2015. A new species of *Aguna* Williams (Lepidoptera, Hesperiiidae) from Panamá belonging to the "*claxon* group." *Revista brasileira de Entomologia* **59**(4): 320-322;
- Warren AD, Dolibaina DR, Hernández-Mejía C. 2015. A new species of *Cogia* from Oaxaca, Mexico (Lepidoptera: Hesperiiidae, Eudaminae). *Zootaxa* **3941**(2): 239-246;
- Steinhauser SR, Miller JY, Grishin NV. 2017. Review of the West Indian *Astraptus xagua* (Lucas) complex (Hesperiiidae: Eudaminae) with the description of a new subspecies from the Bahamas. *Journal of Research on the Lepidoptera* **49**: 81-90;
- Delgado F. Vargas JI. [2017]. Descripción de nuevos rhopaloceros para Colombia y Panamá (Insecta: Lepidoptera). Boletín científico. Museo de Historia natural, Universidad de Caldas **20**(1): 166-195;
- Janzen DH, Burns JM, Cong Q, Hallwachs WD, Dapkey T, Manjunath R, Hajibabaei M, Hebert PDN, Grishin NV. 2017. Nuclear genomes distinguish cryptic species suggested by their DNA barcodes and ecology. *Proceedings of the National Academy of Sciences of the United States of America* **114**(31): 8313-8318;
- Turner TV, Turland VA. 2017. Discovering Jamaican butterflies and their relationships around the Caribbean. Safety Harbor, Caribbean Wildlife Publications. xiv + 492 pp., 1021 figs.;
- Siewert RR, Leviski GL, Mielke OHH, Casagrande MM. 2018. A remarkable new species of *Phocides* (Lepidoptera: Hesperiiidae) from Bolivia and taxonomic considerations on *Phocides charon*. *Iheringia, Série Zoologia* **108**: e2018023;
- Siewert RR, Madruga J, Dolibaina DR, Mielke OHH, Casagrande MM. 2018. Hidden in plain sight: a morphological study revealing three new species of the skipper genus *Drephalys* Watson, 1893 (Lepidoptera: Hesperiiidae) from Brazil. *Zootaxa* **4472**(3):573-580.

## Subfamily Eudaminae

### ***Phocides*** Hübner, [1819]

#### ***Phocides polybius*** (Fabricius, 1793)

*Phocides polybius lilea* (Reakirt, [1867])

*Phocides polybius polybius* (Fabricius, 1793)

*Phocides polybius phanias* (Burmeister, 1880)

#### ***Phocides charon*** (C. Felder & R. Felder, 1859)

#### ***Phocides petroleum*** Siewert, Leviski, Mielke & Casagrande, 2018

#### ***Phocides distans*** (Herrich-Schäffer, 1869)

*Phocides distans licinus* (Möschler, 1879)

*Phocides distans distans* (Herrich-Schäffer, 1869)

*Phocides distans silva* Evans, 1952

#### ***Phocides perillus*** (Mabille, 1888)

#### ***Phocides metrodorus*** E. Bell, 1932

*Phocides metrodorus nigrescens* E. Bell, 1938

*Phocides metrodorus metrodorus* E. Bell, 1932

*Phocides metrodorus metron* Evans, 1952

#### ***Phocides vulcanides*** Röber, 1925

#### ***Phocides novalis*** Evans, 1952

#### ***Phocides thermus*** (Mabille, 1883)

*Phocides thermus thermus* (Mabille, 1883)

*Phocides thermus bellina* Evans, 1952

*Phocides thermus valgus* (Mabille, 1883)

#### ***Phocides partia*** Evans, 1952

#### ***Phocides padrona*** Evans, 1952

**Phocides belus** Godman & Salvin, 1893  
**Phocides pigmalion** (Cramer, 1779)  
*Phocides pigmalion pigmalion* (Cramer, 1779)  
*Phocides pigmalion hewitsonius* (Mabille, 1883)  
*Phocides pigmalion okeechobee* (Worthington, 1881)  
*Phocides pigmalion batabanoides* (W. Holland, 1902)  
*Phocides pigmalion batabano* (Lucas, 1857)  
*Phocides pigmalion bicolora* (Boddaert, 1783)

**Phocides johnsoni** E. Bell, 1947

**Phocides urania** (Westwood, 1852)  
*Phocides urania urania* (Westwood, 1852)  
*Phocides urania vida* (A. Butler, 1872)

**Phocides pialia** (Hewitson, 1857)  
*Phocides pialia maximus* (Mabille, 1888)  
*Phocides pialia intermedia* O. Mielke, 1992  
*Phocides pialia pialia* (Hewitson, 1857)

**Phocides oreides** (Hewitson, [1875])  
*Phocides oreides colombiana* E. Bell, 1938  
*Phocides oreides oreides* (Hewitson, [1875])

**Phocides yokhara** (A. Butler, 1870)  
*Phocides yokhara yokhara* (A. Butler, 1870)  
*Phocides yokhara inca* Le Cerf, 1922  
*Phocides yokhara dryas* Le Cerf, 1922  
*Phocides yokhara charonotis* (Hewitson, 1874)

**Phocides lincea** (Herrich-Schäffer, 1869)  
**Phocides perkinsi** (Kaye, 1931)

**Hypocryptothrix** E. Watson, 1893  
**Hypocryptothrix teutas** (Hewitson, 1876)

**Tarsoctenus** E. Watson, 1893  
**Tarsoctenus papias** (Hewitson, 1857)  
**Tarsoctenus corytus** (Cramer, 1777)  
*Tarsoctenus corytus gaudialis* (Hewitson, 1876)  
*Tarsoctenus corytus corytus* (Cramer, 1777)  
*Tarsoctenus corytus corba* Evans, 1952  
**Tarsoctenus praecia** (Hewitson, 1857)  
*Tarsoctenus praecia praecia* (Hewitson, 1857)  
*Tarsoctenus praecia rufibasis* Boulet, 1910  
*Tarsoctenus praecia plutia* (Hewitson, 1857)  
*Tarsoctenus praecia luna* Evans, 1952

**Phanus** Hübner, [1819]  
**Phanus australis** L. Miller, 1965  
**Phanus vitreus** (Stoll, 1781)  
**Phanus ecitonorum** Austin, 1993  
**Phanus confusus** Austin, 1993  
**Phanus albiapicalis** Austin, 1993  
**Phanus rilma** Evans, 1952  
**Phanus grandis** Austin, 1993  
**Phanus obscurior** Kaye, 1925

*Phanus obscurior obscurior* Kaye, 1925  
*Phanus obscurior prestoni* L. Miller, 1965  
*Phanus marshalli* (W. F. Kirby, 1880)

**Udranomia** A. Butler, 1870  
*Udranomia orcinus* (C. Felder & R. Felder, 1867)  
*Udranomia tomdaleyi* Burns, 2017  
*Udranomia sallydaleyae* Burns, 2017  
*Udranomia kikkawai* (Weeks, 1906)  
*Udranomia eurus* (Mabille & Boulet, 1919)  
*Udranomia spitzii* (Hayward, 1942)

**Drephalys** E. Watson, 1893  
*Drephalys alcmon* (Cramer, 1780)  
*Drephalys mourei* O. Mielke, 1968  
*Drephalys helixus* (Hewitson, 1877)  
*Drephalys kidonoi* Burns, 2000  
*Drephalys phoenicoides* (Mabille & Boulet, 1919)  
*Drephalys phoenice* (Hewitson, 1867)  
*Drephalys heraclides* E. Bell, 1942  
*Drephalys citrinus* Madruga, Siewert, O. Mielke & Casagrande, 2018  
*Drephalys dracarys* Madruga, Siewert, O. Mielke & Dolibaina, 2018  
*Drephalys electrinus* Siewert, Madruga, O. Mielke & Dolibaina, 2018  
*Drephalys miersi* O. Mielke, 1968  
*Drephalys opifex* Evans, 1952  
*Drephalys olvina* Evans, 1952  
*Drephalys olva* Evans, 1952  
*Drephalys eous* (Hewitson, 1867)  
*Drephalys croceus* Austin, 1995  
*Drephalys dumeril* (Latreille, [1824])  
*Drephalys oria* Evans, 1952  
*Drephalys oriander* (Hewitson, 1867)  
*Drephalys talboti* (Le Cerf, 1922)  
*Drephalys tortus* Austin, 1995

**Augiades** Hübner, [1819]  
*Augiades crinissus* (Cramer, 1780)  
*Augiades epimethea* (Plötz, 1883)  
*Augiades epimethea bicolor* (Mabille & Boulet, 1919)  
*Augiades epimethea epimethea* (Plötz, 1883)

**Hyalothyryus** Mabille, 1878  
*Hyalothyryus infernalis* (Möschler, 1877)  
*Hyalothyryus infernalis infernalis* (Möschler, 1877)  
*Hyalothyryus infernalis infa* Evans, 1952  
*Hyalothyryus leucomelas* (Geyer, 1832)  
*Hyalothyryus nitocris* (Stoll, 1782)  
*Hyalothyryus mimicus* Mabille & Boulet, 1919  
*Hyalothyryus neleus* (Linnaeus, 1758)  
*Hyalothyryus neleus pemphigargyra* (Mabille, 1888)  
*Hyalothyryus neleus neleus* (Linnaeus, 1758)

*Hyalothyris neleus neda* Evans, 1952

**Phareas** Westwood, 1852

*Phareas burnsi* Grishin, 2013

*Phareas coeleste* Westwood, 1852

**Entheus** Hübner, [1819]

*Entheus eumelus* (Cramer, 1777)

*Entheus ninyas* H. Druce, 1912

*Entheus eunyas* Austin, O. Mielke & Steinhauser, 1997

*Entheus lemna* (A. Butler, 1870)

*Entheus gentius* (Cramer, 1777)

*Entheus bombus* Austin, O. Mielke & Steinhauser, 1997

*Entheus aureolus* Austin, O. Mielke & Steinhauser, 1997

*Entheus huertasae* Grishin, 2013

*Entheus telemus* Mabille, 1898

*Entheus latebrosus* Austin, 1997

*Entheus priassus* (Linnaeus, 1758)

*Entheus priassus priassus* (Linnaeus, 1758)

*Entheus priassus pralina* Evans, 1952

*Entheus aureanota* Austin, O. Mielke & Steinhauser, 1997

*Entheus curvus* Austin, 1997

*Entheus matho* Godman & Salvin, 1879

*Entheus matho matho* Godman & Salvin, 1879

*Entheus matho latifascius* M. Hering, 1925

*Entheus matho marmato* Salazar & Vargas, 2017

*Entheus matho aequatorius* Mabille & Bouillet, 1919

*Entheus matho dius* Mabille, 1898

*Entheus crux* Steinhauser, 1989

*Entheus warreni* Grishin, 2012

**Cabirus** Hübner, [1819]

*Cabirus procas* (Cramer, 1777)

*Cabirus procas procas* (Cramer, 1777)

*Cabirus procas junta* Evans, 1952

*Cabirus procas purda* Evans, 1952

**Proteides** Hübner, [1819]

*Proteides mercurius* (Fabricius, 1787)

*Proteides mercurius mercurius* (Fabricius, 1787)

*Proteides mercurius sanantonio* (Lucas, 1857)

*Proteides mercurius sanchesii* E. Bell & W. Comstock, 1948

*Proteides mercurius jamaicensis* Skinner, 1920

*Proteides mercurius pedro* (Dewitz, 1877)

*Proteides mercurius vincenti* E. Bell & W. Comstock, 1948

*Proteides mercurius angasi* Godman & Salvin, 1884

*Proteides mercurius grenadensis* Enrico & Pinchon, 1969

*Proteides maysi* (Lucas, 1857)

**Epargyreus** Hübner, [1819]

*Epargyreus zestos* (Geyer, 1832)



*Epargyreus zestos zestos* (Geyer, 1832)  
*Epargyreus zestos inaguarum* Clench & Bjorndal, 1980

***Epargyreus clarus*** (Cramer, 1775)

*Epargyreus clarus californicus* MacNeill, 1975  
*Epargyreus clarus clarus* (Cramer, 1775)  
*Epargyreus clarus huachuca* Dixon, 1955  
*Epargyreus clarus profugus* Austin, 1998

***Epargyreus antaeus*** (Hewitson, 1867)

***Epargyreus spanna*** Evans, 1952

***Epargyreus barisses*** (Hewitson, 1874)

*Epargyreus barisses barisses* (Hewitson, 1874)  
*Epargyreus barisses argentina* Mabille, 1903

***Epargyreus tmolis*** (Burmeister, 1875)

***Epargyreus socus*** (Hübner, [1825])

*Epargyreus socus orizaba* Scudder, 1872  
*Epargyreus socus chota* Evans, 1952  
*Epargyreus socus dicta* Evans, 1952  
*Epargyreus socus sinus* Evans, 1952  
*Epargyreus socus socus* (Hübner, [1825])  
*Epargyreus socus pseudexadeus* Westwood, 1852

***Epargyreus windi*** H. Freeman, 1969

***Epargyreus exadeus*** (Cramer, 1780)

*Epargyreus exadeus cruza* Evans, 1952  
*Epargyreus exadeus exadeus* (Cramer, 1780)

***Epargyreus nutra*** Evans, 1952

***Epargyreus aspina*** Evans, 1952

***Epargyreus spina*** Evans, 1952

*Epargyreus spina spina* Evans, 1952  
*Epargyreus spina verruga* Evans, 1952

***Epargyreus spinta*** Evans, 1952

***Epargyreus spinosa*** Evans, 1952

***Epargyreus clavicornis*** (Herrich-Schäffer, 1869)

*Epargyreus clavicornis gaumeri* Godman & Salvin, 1893  
*Epargyreus clavicornis tenda* Evans, 1955  
*Epargyreus clavicornis clavicornis* (Herrich-Schäffer, 1869)

***Epargyreus brodkorbi*** H. Freeman, 1969

***Epargyreus deleoni*** H. Freeman, 1977

***Epargyreus enispe*** (Hewitson, 1867)

*Epargyreus enispe enispe* (Hewitson, 1867)  
*Epargyreus enispe elta* Evans, 1952

***Polygonus*** Hübner, [1825]

***Polygonus leo*** (Gmelin, [1790])

*Polygonus leo arizonensis* (Skinner, 1911)  
*Polygonus leo pallida* Röber, 1925  
*Polygonus leo histrio* Röber, 1925  
*Polygonus leo leo* (Gmelin, [1790])  
*Polygonus leo hagar* Evans, 1952

***Polygonus savigny*** (Latreille, [1824])

*Polygonus savigny savigny* (Latreille, [1824])  
*Polygonus savigny punctus* E. Bell & W. Comstock, 1948

**Chioides** Lindsey, 1921

- Chioides albofasciatus*** (Hewitson, 1867)
- Chioides catillus*** (Cramer, 1780)
  - Chioides catillus albius* Evans, 1952
  - Chioides catillus catillus* (Cramer, 1780)
  - Chioides catillus jethira* (A. Butler, 1870)
- Chioides churchi*** E. Bell & W. Comstock, 1948
- Chioides cinereus*** (Mabille & Vuillot, 1891)
- Chioides concinnus*** (Mabille, 1877)
- Chioides vintra*** Evans, 1952
- Chioides iverna*** Evans, 1952
- Chioides zilpa*** (A. Butler, 1872)
- Chioides ixion*** (Plötz, 1881)
- Chioides marmorosa*** (Herrich-Schäffer, 1865)

**Aguna** R. Williams, 1927

- Aguna asander*** (Hewitson, 1867)
  - Aguna asander asander* (Hewitson, 1867)
  - Aguna asander haitensis* (Mabille & Bouillet, 1912)
  - Aguna asander jasper* Evans, 1952
- Aguna megaeles*** (Mabille, 1888)
  - Aguna megaeles malia* Evans, 1952
  - Aguna megaeles megaeles* (Mabille, 1888)
- Aguna albistria*** (Plötz, 1880)
  - Aguna albistria albistria* (Plötz, 1880)
  - Aguna albistria leucogramma* (Mabille, 1888)
- Aguna metophis*** (Latreille, [1824])
- Aguna camagura*** (R. Williams, 1926)
- Aguna claxon*** Evans, 1952
- Aguna prasinus*** Siewert, Leviski, O. Mielke & Casagrande, 2015
- Aguna clina*** Evans, 1952
- Aguna latifascia*** Austin & O. Mielke, 1998
- Aguna coelus*** (Stoll, 1781)
- Aguna cirrus*** Evans, 1952
- Aguna coeloides*** Austin & O. Mielke, 1998
- Aguna nicolayi*** Austin & O. Mielke, 1998
- Aguna venezuelae*** O. Mielke, 1971
- Aguna latimacula*** Austin & O. Mielke, 1998
- Aguna aurunce*** (Hewitson, 1867)
  - Aguna aurunce aurunce* (Hewitson, 1867)
  - Aguna aurunce hypozonius* (Plötz, 1881)
- Aguna glaphyrus*** (Mabille, 1888)
- Aguna penicillata*** Austin & O. Mielke, 1998
- Aguna spicata*** Austin & O. Mielke, 1998
- Aguna longicauda*** Austin & O. Mielke, 1998
- Aguna ganna*** (Möschler, 1879)
- Aguna panama*** Austin & O. Mielke, 1998
- Aguna spatulata*** Austin & O. Mielke, 1998
- Aguna similis*** Austin & O. Mielke, 1998
- Aguna mesodentata*** Austin & O. Mielke, 1998

***Aguna squamalba*** Austin & O. Mielke, 1998

***Aguna parva*** Austin & O. Mielke, 1998

***Typhedanus*** A. Butler, 1870

***Typhedanus crameri*** McHenry, 1960

***Typhedanus undulatus*** (Hewitson, 1867)

***Typhedanus galbula*** (Plötz, 1881)

***Typhedanus optica*** Evans, 1952

*Typhedanus optica optica* Evans, 1952

*Typhedanus optica goya* Evans, 1952

***Typhedanus stylites*** (Herrich-Schäffer, 1869)

***Typhedanus aziris*** (Hewitson, 1867)

***Typhedanus umber*** (Herrich-Schäffer, 1869)

***Typhedanus ampyx*** (Godman & Salvin, 1893)

***Typhedanus salas*** H. Freeman, 1977

***Typhedanus cursinoi*** O. Mielke, 1979

***Typhedanus eliasi*** O. Mielke, 1979

***Polythrix*** E. Watson, 1893

***Polythrix octomaculata*** (Sepp, [1844])

***Polythrix maizae*** Hellebuyck, 1998

***Polythrix mexicanus*** H. Freeman, 1969

***Polythrix roma*** Evans, 1952

***Polythrix asine*** (Hewitson, 1867)

***Polythrix hirtius*** (A. Butler, 1870)

***Polythrix gyges*** Evans, 1952

***Polythrix minvanes*** (R. Williams, 1926)

***Polythrix ceculus*** (Herrich-Schäffer, 1869)

***Polythrix caunus*** (Herrich-Schäffer, 1869)

***Polythrix auginus*** (Hewitson, 1867)

***Polythrix metallescens*** (Mabille, 1888)

***Polythrix kanshul*** Shuey, 1991

***Polythrix eudoxus*** (Stoll, 1781)

***Cephise*** Evans, 1952

***Cephise cephise*** (Herrich-Schäffer, 1869)

***Cephise impunctus*** Austin & O. Mielke, 2000

***Cephise glarus*** (Mabille, 1888)

***Cephise nuspesez*** Burns, 1996

***Cephise malesedis*** Austin & O. Mielke, 2000

***Cephise maculatus*** Austin & O. Mielke, 2000

***Cephise burnsi*** Austin & O. Mielke, 2000

***Cephise mexicanus*** Austin & O. Mielke, 2000

***Cephise procerus*** (Plötz, 1881)

***Cephise aelius*** (Plötz, 1881)

***Cephise callias*** (Mabille, 1888)

***Cephise guatemalaensis*** (H. Freeman, 1977)

***Venada*** Evans, 1952

***Venada nevada*** Burns, 2005

***Venada advena*** (Mabille, 1889)

***Venada daneva*** Burns, 2005  
***Venada lamella*** Burns, 2013  
***Venada cacao*** Burns, 2005  
***Venada naranja*** Burns, 2005

***Heronia*** Mabilite & Bouillet, 1912  
***Heronia labriaris*** (A. Butler, 1877)

***Chrysoplectrum*** E. Watson, 1893  
***Chrysoplectrum pervivax*** (Hübner, [1819])  
***Chrysoplectrum bahiana*** (Herrich-Schäffer, 1869)  
***Chrysoplectrum orphne*** (Plötz, 1881)  
***Chrysoplectrum otriades*** (Hewitson, 1867)  
***Chrysoplectrum epicinea*** (A. Butler & H. Druce, 1872)  
***Chrysoplectrum perniciosus*** (Herrich-Schäffer, 1869)  
***Chrysoplectrum cuminaensis*** R.F. d'Almeida, 1976  
***Chrysoplectrum orpheus*** (Plötz, 1881)  
***Chrysoplectrum perna*** Evans, 1952  
***Chrysoplectrum albovenae*** E. Bell, 1932

***Zestusa*** Lindsey, 1925  
***Zestusa dorus*** (W. H. Edwards, 1882)  
***Zestusa elwesi*** (Godman & Salvin, 1893)  
***Zestusa staudingeri*** (Mabilite, 1888)  
***Zestusa levona*** Steinhauser, 1972

***Lobocla*** Moore, 1884  
***Lobocla liliana*** (Atkinson, 1871)  
*Lobocla liliana ignatius* (Plötz, 1882)  
*Lobocla liliana liliana* (Atkinson, 1871)  
***Lobocla aborica*** (Tytler, 1915)  
*Lobocla aborica aborica* (Tytler, 1915)  
*Lobocla aborica zesta* Evans, 1949  
*Lobocla aborica tonka* Evans, 1949  
***Lobocla quadripunctata*** Fan & Wang, 2004  
***Lobocla disparalis*** Murayama, 1995  
***Lobocla bifasciatus*** (Bremer & Grey, 1853)  
***Lobocla contractus*** (Leech, 1894)  
***Lobocla germanus*** (Oberthür, 1886)  
***Lobocla nepos*** (Oberthür, 1886)  
*Lobocla nepos nepos* (Oberthür, 1886)  
*Lobocla nepos phyllis* (Hemming, 1933)  
***Lobocla proximus*** (Leech, 1891)  
***Lobocla simplex*** (Leech, 1891)

***Codattractus*** Lindsey, 1921  
***Codattractus carlos*** Evans, 1952  
*Codattractus carlos carlos* Evans, 1952  
*Codattractus carlos arguta* Evans, 1952  
*Codattractus carlos rowena* Evans, 1952  
***Codattractus alcaeus*** (Hewitson, 1867)

*Codatractus alcaeus alcaeus* (Hewitson, 1867)

*Codatractus alcaeus apulia* Evans, 1952

***Codatractus yucatanus*** H. Freeman, 1977

***Codatractus aminias*** (Hewitson, 1867)

***Codatractus arizonensis*** (Skinner, 1905)

***Codatractus sallyae*** A. Warren, 1995

***Codatractus melon*** (Godman & Salvin, 1893)

***Codatractus bryaxis*** (Hewitson, 1867)

***Codatractus imalena*** (A. Butler, 1872)

***Codatractus cyledis*** (Dyar, 1912)

***Codatractus cyda*** (Godman, 1901)

***Codatractus uvydixa*** (Dyar, 1914)

***Codatractus valeriana*** (Plötz, 1881)

"***Codatractus***" ***hyster*** (Dyar, 1916); removed from *Codatractus* by Burns (1996), but not placed in any genus

### ***Ridens*** Evans, 1952

***Ridens crison*** (Godman & Salvin, 1893)

*Ridens crison crison* (Godman & Salvin, 1893)

*Ridens crison howarthi* Steinhauser, 1974

*Ridens crison cachinnans* (Godman, 1901)

***Ridens ridens*** (Hewitson, 1876)

***Ridens fieldi*** Steinhauser, 1974

***Ridens toddi*** Steinhauser, 1974

***Ridens biolleyi*** (Mabille, 1900)

***Ridens mercedes*** Steinhauser, 1983

***Ridens harpagus*** (C. Felder & R. Felder, 1867)

***Ridens philistus*** (Hopffer, 1874)

*Ridens philistus philistus* (Hopffer, 1874)

*Ridens philistus philia* Evans, 1952

***Ridens mephitis*** (Hewitson, 1876)

***Ridens fulminans*** (Herrich-Schäffer, 1869)

***Ridens fulima*** Evans, 1952

***Ridens panche*** (R. Williams, 1927)

***Ridens pacasa*** (R. Williams, 1927)

***Ridens bidens*** Austin, 1998

***Ridens allyni*** H. Freeman, 1979

***Ridens miltas*** (Godman & Salvin, 1893)

***Ridens bridgmani*** (Weeks, 1902)

***Ridens nora*** Evans, 1952

***Ridens tristis*** (Draudt, [1922])

***Ridens telegonoides*** (Mabille & Boulet, 1912)

### ***Urbanus*** Hübner, [1807]

***Urbanus proteus*** (Linnaeus, 1758)

*Urbanus proteus proteus* (Linnaeus, 1758)

*Urbanus proteus domingo* (Scudder, 1872)

***Urbanus viterboana*** (Ehrmann, 1907)

***Urbanus dubius*** Steinhauser, 1981

***Urbanus belli*** (Hayward, 1935)

***Urbanus bernikerni*** Burns, 2014

***Urbanus ehakernae*** Burns, 2014

***Urbanus segnestami*** Burns, 2014  
***Urbanus huancavillcas*** (R. Williams, 1926)  
***Urbanus pronta*** Evans, 1952  
***Urbanus longicaudus*** Austin, 1998  
***Urbanus parvus*** Austin, 1998  
***Urbanus pronus*** Evans, 1952  
***Urbanus esmeraldus*** (A. Butler, 1877)  
***Urbanus esma*** Evans, 1952  
***Urbanus evona*** Evans, 1952  
***Urbanus elmina*** Evans, 1952  
***Urbanus viridis*** H. Freeman, 1970  
***Urbanus esta*** Evans, 1952  
***Urbanus prodicus*** E. Bell, 1956  
***Urbanus magnus*** Steinhauser, 1981  
***Urbanus velinus*** (Plötz, 1881)  
***Urbanus villus*** Austin, 1998  
***Urbanus dorantes*** (Stoll, 1790)  
     *Urbanus dorantes calafia* (R. Williams, 1926)  
     *Urbanus dorantes dorantes* (Stoll, 1790)  
     *Urbanus dorantes cramptoni* W. Comstock, 1944  
     *Urbanus dorantes santiago* (Lucas, 1857)  
     *Urbanus dorantes galapagensis* (F. Williams, 1911)  
***Urbanus obscurus*** (Hewitson, 1867)  
***Urbanus teleus*** (Hübner, 1821)  
***Urbanus tanna*** Evans, 1952  
***Urbanus ambiguus*** de Jong, 1983  
***Urbanus cindra*** Evans, 1952  
***Urbanus zagorus*** (Plötz, 1881)  
***Urbanus simplicius*** (Stoll, 1790)  
***Urbanus procne*** (Plötz, 1881)  
***Urbanus evenus*** (Ménétriés, 1855)  
***Urbanus trebia*** (Möschler, 1879)  
***Urbanus carmelita*** (Herrich-Schäffer, 1869)  
     *Urbanus carmelita carmelita* (Herrich-Schäffer, 1869)  
     *Urbanus carmelita barra* Evans, 1952  
***Urbanus reductus*** (N. Riley, 1919)  
***Urbanus doryssus*** (Swainson, 1831)  
     *Urbanus doryssus chales* (Godman & Salvin, 1893)  
     *Urbanus doryssus doryssus* (Swainson, 1831)  
     *Urbanus doryssus albicuspis* (Herrich-Schäffer, 1869)  
***Urbanus albimargo*** (Mabille, 1875)  
     *Urbanus albimargo albimargo* (Mabille, 1875)  
     *Urbanus albimargo takuta* Evans, 1952  
     *Urbanus albimargo rica* Evans, 1952  
***Urbanus virescens*** (Mabille, 1877)  
***Urbanus chalco*** (Hübner, 1823)

***Astraptus*** Hübner, [1819]  
***Astraptus talus*** (Cramer, 1777)  
***Astraptus fulgerator*** (Walch, 1775)  
     *Astraptus fulgerator azul* (Reakirt, [1867])

*Astraptes fulgurator fulgurator* (Walch, 1775)  
***Astraptes fulgor*** (Hayward, 1939)  
***Astraptes naxos*** (Hewitson, 1867)  
***Astraptes xagua*** (Lucas, 1857)  
*Astraptes xagua xagua* (Lucas, 1857)  
*Astraptes xagua harveyi* Clench, Steinhauser and J. Miller, 2017  
***Astraptes christyi*** (Sharpe, 1898)  
***Astraptes apastus*** (Cramer, 1777)  
*Astraptes apastus apastus* (Cramer, 1777)  
*Astraptes apastus pusa* Evans, 1952  
***Astraptes megalurus*** (Mabille, 1877)  
***Astraptes tucuti*** (R. Williams, 1927)  
***Astraptes brevicauda*** (Plötz, 1886)  
***Astraptes palliolum*** (H. Druce, 1908)  
***Astraptes phalaecus*** (Godman & Salvin, 1893)  
***Astraptes egregius*** (A. Butler, 1870)  
*Astraptes egregius egregius* (A. Butler, 1870)  
*Astraptes egregius coxeyi* (R. Williams, 1931)  
***Astraptes erycina*** (Plötz, 1881)  
***Astraptes halesius*** (Hewitson, 1877)  
***Astraptes mabillei*** Steinhauser, 1989  
***Astraptes aulus*** (Plötz, 1881)  
***Astraptes enotrus*** (Stoll, 1781)  
***Astraptes janeira*** (Schaus, 1902)  
***Astraptes elorus*** (Hewitson, 1867)  
***Astraptes alardus*** (Stoll, 1790)  
*Astraptes alardus latia* Evans, 1952  
*Astraptes alardus aquila* Evans, 1952  
*Astraptes alardus alardus* (Stoll, 1790)  
***Astraptes habana*** (Lucas, 1857)  
*Astraptes habana habana* (Lucas, 1857)  
*Astraptes habana heriul* (Mabille & Boulet, 1912)  
***Astraptes alector*** (C. Felder & R. Felder, 1867)  
*Astraptes alector hopfferi* (Plötz, 1881)  
*Astraptes alector alector* (C. Felder & R. Felder, 1867)  
***Astraptes cretatus*** (Hayward, 1939)  
*Astraptes cretatus cretatus* (Hayward, 1939)  
*Astraptes cretatus adoba* Evans, 1952  
***Astraptes creteus*** (Cramer, 1780)  
*Astraptes creteus crana* Evans, 1952  
*Astraptes creteus crilla* Evans, 1952  
*Astraptes creteus cyprus* Evans, 1952  
*Astraptes creteus creteus* (Cramer, 1780)  
*Astraptes creteus siges* (Mabille, 1903)  
***Astraptes bifascia*** (Herrich-Schäffer, 1869)  
***Astraptes latimargo*** (Herrich-Schäffer, 1869)  
***Astraptes tinda*** Evans, 1952  
***Astraptes chiriquensis*** (Staudinger, 1876)  
*Astraptes chiriquensis chiriquensis* (Staudinger, 1876)  
*Astraptes chiriquensis erana* Evans, 1952

*Astrartes chiriquensis meretrix* (Hewitson, 1876)  
*Astrartes chiriquensis oenander* (Hewitson, 1876)

***Astrartes weymeri*** (Plötz, 1882)

***Astrartes jaira*** (A. Butler, 1870)

***Astrartes cassander*** (Fabricius, 1793)

***Astrartes galesus*** (Mabille, 1888)

*Astrartes galesus cassius* Evans, 1952

*Astrartes galesus galesus* (Mabille, 1888)

***Astrartes anaphus*** (Cramer, 1777)

*Astrartes anaphus annetta* Evans, 1952

*Astrartes anaphus anaphus* (Cramer, 1777)

*Astrartes anaphus anoma* Evans, 1952

*Astrartes anaphus aniza* Evans, 1952

*Astrartes anaphus anausis* (Godman & Salvin, 1896)

***Narcosius*** Steinhauser, 1986

***Narcosius narcosius*** (Stoll, 1790)

***Narcosius aulina*** (Evans, 1952)

***Narcosius samson*** (Evans, 1952)

***Narcosius mura*** (R. Williams, 1927)

***Narcosius pseudomura*** Austin, 1996

***Narcosius colossus*** (Herrich-Schäffer, 1869)

*Narcosius colossus colossus* (Herrich-Schäffer, 1869)

*Narcosius colossus granadensis* (Möschler, 1879)

***Narcosius dosula*** (Evans, 1952)

***Narcosius hercules*** (E. Bell, 1956)

***Narcosius parisi*** (R. Williams, 1927)

*Narcosius parisi helen* (Evans, 1952)

*Narcosius parisi parisi* (R. Williams, 1927)

***Narcosius odysseus*** Austin, 1996

***Narcosius nazaraeus*** Steinhauser, 1986

***Narcosius steinhauseri*** Austin, 1996

***Calliades*** Mabille & Boulet, 1912

***Calliades oryx*** (C. Felder & R. Felder, 1862)

***Calliades zeutus*** (Möschler, 1879)

***Autochton*** Hübner, 1823

***Autochton cellus*** (Boisduval & Le Conte, [1837])

***Autochton siernadror*** Burns, 1984

***Autochton pseudocellus*** (Coolidge & Clemence, [1910])

***Autochton cincta*** (Plötz, 1882)

***Autochton vectilucis*** (A. Butler, 1872)

***Autochton integrifascia*** (Mabille, 1891)

***Autochton neis*** (Geyer, 1832)

***Autochton reflexus*** (Mabille & Boulet, 1912)

***Autochton longipennis*** (Plötz, 1882)

***Autochton zarex*** (Hübner, 1818)

***Autochton bipunctatus*** (Gmelin, [1790])

***Autochton sulfureolus*** (Mabille, 1883)

***Autochton itylus*** Hübner, 1823



**Thessia** Steinhauser, 1989

***Thessia athesis*** (Hewitson, 1867)

***Thessia jalapus*** (Plötz, 1881)

**Achalarus** Scudder, 1872

***Achalarus toxeus*** (Plötz, 1882)

***Achalarus albociliatus*** (Mabille, 1877)

*Achalarus albociliatus albociliatus* (Mabille, 1877)

*Achalarus albociliatus leucophrys* (Mabille, 1898)

*Achalarus albociliatus nocera* (Plötz, 1882)

***Achalarus lyciades*** (Geyer, 1832)

***Achalarus casica*** (Herrich-Schäffer, 1869)

***Achalarus tehuacana*** (Draudt, 1922)

**Thorybes** Scudder, 1872

***Thorybes confusis*** E. Bell, 1923

***Thorybes bathyllus*** (J. E. Smith, 1797)

***Thorybes mexicana*** (Herrich-Schäffer, 1869)

*Thorybes mexicana aemilea* (Skinner, 1893)

*Thorybes mexicana blanca* Scott, 1981

*Thorybes mexicana nevada* Scudder, 1872

*Thorybes mexicana dobra* Evans, 1952

*Thorybes mexicana mexicana* (Herrich-Schäffer, 1869)

*Thorybes mexicana ducia* Evans, 1952

***Thorybes diversus*** E. Bell, 1927

***Thorybes drusius*** (W. H. Edwards, [1884])

***Thorybes pylades*** (Scudder, 1870)

*Thorybes pylades indistinctus* Austin & J. Emmel, 1998

*Thorybes pylades albosuffusa* H. Freeman, 1943

*Thorybes pylades pylades* (Scudder, 1870)

**Cabares** Godman & Salvin, 1894

***Cabares potrillo*** (Lucas, 1857)

*Cabares potrillo potrillo* (Lucas, 1857)

*Cabares potrillo reducta* Mabille & Boulet, 1919

***Cabares rinta*** Evans, 1952

**Spathilepia** A. Butler, 1870

***Spathilepia clonius*** (Cramer, 1775)

**Oechydrus** E. Watson, 1893

***Oechydrus chersis*** (Herrich-Schäffer, 1869)

*Oechydrus chersis chersis* (Herrich-Schäffer, 1869)

*Oechydrus chersis ochrilinea* (Schaus, 1902)

*Oechydrus chersis rufus* Evans, 1953

*Oechydrus chersis evelinda* (A. Butler, 1870)

**Ectomis** Mabille, 1878

***Ectomis cythna*** (Hewitson, 1878)

*Ectomis cythna cythna* (Hewitson, 1878)

*Ectomis cythna ega* Evans, 1953

**Nerula** Mabilles, 1888

*Nerula fibrena* (Hewitson, 1877)

*Nerula tuba* Evans, 1953

**Marela** Mabilles, 1903

*Marela tamyroides* (C. Felder & R. Felder, 1867)

*Marela tamyris* Mabilles, 1903

*Marela tamyris tamyris* Mabilles, 1903

*Marela tamyris tamba* Evans, 1953

**Cogia** A. Butler, 1870

*Cogia hassan* A. Butler, 1870

*Cogia hassan hassan* A. Butler, 1870

*Cogia hassan evansi* E. Bell, 1937

*Cogia abdul* Hayward, 1947

*Cogia cajeta* (Herrich-Schäffer, 1869)

*Cogia cajeta cajeta* (Herrich-Schäffer, 1869)

*Cogia cajeta eluina* Godman & Salvin, 1894

*Cogia troilus* Mabilles, 1898

*Cogia punctilia* Plötz, 1882

*Cogia cerradicola* (O. Mielke, 1967)

*Cogia outis* (Skinner, 1894)

*Cogia hippalus* (W. H. Edwards, 1882)

*Cogia hippalus peninsularis* L. Miller & MacNeill, 1969

*Cogia hippalus hippalus* (W. H. Edwards, 1882)

*Cogia hippalus hiska* Evans, 1953

*Cogia hippalus hester* Evans, 1953

*Cogia azila* Evans, 1953

*Cogia caicus* (Herrich-Schäffer, 1869)

*Cogia caicus moschus* (W. H. Edwards, 1882)

*Cogia caicus caicus* (Herrich-Schäffer, 1869)

*Cogia calchas* (Herrich-Schäffer, 1869)

*Cogia grandis* N. Riley, 1921

*Cogia aventinus* (Godman & Salvin, 1894)

*Cogia buena* A. Warren, Dolibaina & Hernández-Mejía, 2015

*Cogia mala* Evans, 1953

*Cogia elaites* (Hewitson, 1867)

**Paracogia** O. Mielke, 1977

*Paracogia acanthopoda* O. Mielke, 1977

**Telemiades** Hübner, [1819]

*Telemiades delalande* (Latreille, [1824])

*Telemiades litanicus* (Hewitson, 1876)

*Telemiades vansa* Evans, 1953

*Telemiades gallius* (Mabilles, 1888)

*Telemiades chrysorrhoea* (Godman & Salvin, 1893)

*Telemiades centrites* (Hewitson, 1870)

*Telemiades centrites contra* Evans, 1953

*Telemiades centriles centriles* (Hewitson, 1870)  
***Telemiades vespasius*** (Fabricius, 1793)  
***Telemiades squanda*** Evans, 1953  
***Telemiades trenda*** Evans, 1953  
***Telemiades nicomedes*** (Möschler, 1879)  
***Telemiades meris*** (Plötz, 1886)  
*Telemiades meris meris* (Plötz, 1886)  
*Telemiades meris brazus* E. Bell, 1949  
***Telemiades choricus*** (Schaus, 1902)  
***Telemiades megallus*** Mabille, 1888  
***Telemiades sila*** Evans, 1953  
***Telemiades epicalus*** Hübner, [1819]  
***Telemiades penidas*** (Hewitson, 1867)  
***Telemiades avitus*** (Stoll, 1781)  
***Telemiades antiopae*** (Plötz, 1882)  
*Telemiades antiopae antiopae* (Plötz, 1882)  
*Telemiades antiopae tosca* Evans, 1953  
***Telemiades fides*** E. Bell, 1949  
***Telemiades amphion*** (Geyer, 1832)  
*Telemiades amphion pekahia* (Hewitson, 1868)  
*Telemiades amphion amphion* (Geyer, 1832)  
*Telemiades amphion misitheus* Mabille, 1888  
*Telemiades amphion marpesus* (Hewitson, 1876)  
***Telemiades laogonus*** (Hewitson, 1876)  
*Telemiades laogonus nicola* (Plötz, 1882)  
*Telemiades laogonus laogonus* (Hewitson, 1876)  
***Telemiades corbulo*** (Stoll, 1781)  
***Telemiades oiclus*** (Mabille, 1889)

***Bungalotis*** E. Watson, 1893  
***Bungalotis erythus*** (Cramer, 1775)  
***Bungalotis diophorus*** (Möschler, 1883)  
***Bungalotis gagarini*** O. Mielke, 1967  
***Bungalotis midas*** (Cramer, 1775)  
***Bungalotis aureus*** Austin, 2008  
***Bungalotis astylos*** (Cramer, 1780)  
***Bungalotis milleri*** H. Freeman, 1977  
***Bungalotis quadratum*** (Sepp, [1845])  
*Bungalotis quadratum quadratum* (Sepp, [1845])  
*Bungalotis quadratum barba* Evans, 1952  
***Bungalotis sipa*** de Jong, 1983  
***Bungalotis clusia*** Evans, 1952  
***Bungalotis borax*** Evans, 1952  
***Bungalotis lactos*** Evans, 1952

***Salatis*** Evans, 1952  
***Salatis canalis*** (Skinner, 1920)  
***Salatis salatis*** (Stoll, 1782)  
***Salatis cebrenus*** (Cramer, 1777)  
***Salatis fulvius*** (Plötz, 1882)  
***Salatis scyrus*** (E. Bell, 1934)

***Salatis flavomarginatus*** (Sepp, [1851])

***Sarmientoia*** Berg, 1897

***Sarmientoia dinka*** Evans, 1952

***Sarmientoia eriopis*** (Hewitson, 1867)

***Sarmientoia phaselis*** (Hewitson, 1867)

***Sarmientoia faustinus*** (Burmeister, 1878)

***Sarmientoia haywardi*** O. Mielke, 1967

***Sarmientoia similis*** O. Mielke, 1967

***Sarmientoia almeidai*** O. Mielke, 1967

***Sarmientoia browni*** O. Mielke, 1967

***Nicephellus*** Austin, 2008

***Nicephellus nicephorus*** (Hewitson, 1876)

***Euriphellus*** Austin, 2008

***Euriphellus euribates*** (Stoll, 1782)

*Euriphellus euribates euribates* (Stoll, 1782)

*Euriphellus euribates polygius* (Latreille, [1824])

***Dyscophellus*** Godman & Salvin, 1893

***Dyscophellus phraxanor*** (Hewitson, 1876)

*Dyscophellus phraxanor lama* Evans, 1952

*Dyscophellus phraxanor phraxanor* (Hewitson, 1876)

*Dyscophellus phraxanor mena* Evans, 1952

***Dyscophellus marian*** Evans, 1952

***Dyscophellus porcius*** (C. Felder & R. Felder, 1862)

*Dyscophellus porcius porcius* (C. Felder & R. Felder, 1862)

*Dyscophellus porcius doriscus* (Hewitson, 1867)

***Dyscophellus sebalus*** (Stoll, 1781)

***Dyscophellus erythras*** (Mabille, 1888)

***Dyscophellus mielkei*** Austin, 2008

***Dyscophellus diaphorus*** (Mabille & Boulet, 1912)

***Dyscophellus porsena*** (E. Bell, 1934)

***Dyscophellus ramon*** Evans, 1952

***Dyscophellus ramusis*** (Stoll, 1781)

***Dyscophellus damias*** (Plötz, 1882)

***Nascus*** E. Watson, 1893

***Nascus phintias*** Schaus, 1913

***Nascus phocus*** (Cramer, 1777)

***Nascus solon*** (Plötz, 1882)

*Nascus solon corilla* Evans, 1952

*Nascus solon solon* (Plötz, 1882)

***Nascus broteas*** (Cramer, 1780)

***Nascus prax*** Evans, 1952

***Pseudonascus*** Austin, 2008

***Pseudonascus paullinae*** (Sepp, [1842])

***Porphyrogenes*** E. Watson, 1893

*Porphyrogenes boliva* Evans, 1952  
*Porphyrogenes ferruginea* (Plötz, 1883)  
*Porphyrogenes despecta* (A. Butler, 1870)  
*Porphyrogenes omphale* (A. Butler, 1871)  
*Porphyrogenes pausias* (Hewitson, 1867)  
*Porphyrogenes probus* (Möschler, 1877)  
*Porphyrogenes vulpecula* (Plötz, 1882)  
*Porphyrogenes sororcula* (Mabille & Boulet, 1912)  
*Porphyrogenes specularis* Austin & O. Mielke, 2008  
*Porphyrogenes spanda* Evans, 1952  
*Porphyrogenes stresa* Evans, 1952  
*Porphyrogenes zohra* (Möschler, 1879)  
*Porphyrogenes sparus* Austin & O. Mielke, 2008  
*Porphyrogenes speciosus* Austin & O. Mielke, 2008  
*Porphyrogenes peterwegei* Burns, 2010  
*Porphyrogenes convexus* Austin & O. Mielke, 2008  
*Porphyrogenes spadix* Austin & O. Mielke, 2008  
*Porphyrogenes splendidus* Austin & O. Mielke, 2008  
*Porphyrogenes simulator* Austin & O. Mielke, 2008  
*Porphyrogenes sula* (R. Williams & E. Bell, 1940)  
*Porphyrogenes spina* Austin & O. Mielke, 2008  
*Porphyrogenes sporta* Austin & O. Mielke, 2008  
*Porphyrogenes glavia* Evans, 1952  
*Porphyrogenes sparta* Evans, 1952  
*Porphyrogenes spoda* Evans, 1952  
*Porphyrogenes stupa* Evans, 1952  
*Porphyrogenes passalus* (Herrich-Schäffer, 1869)  
*Porphyrogenes virgatus* (Mabille, 1888)  
*Porphyrogenes eudemus* (Mabille, 1888)

**Ocyba** Lindsey, 1925

*Ocyba calathana* (Hewitson, 1868)  
*Ocyba calathana calanus* (Godman & Salvin, 1894)  
*Ocyba calathana calathana* (Hewitson, 1868)  
*Ocyba calathana compusa* (Hewitson, 1868)

**Oileides** Hübner, [1825]

*Oileides azines* (Hewitson, 1867)  
*Oileides fenestratus* (Gmelin, [1790])  
*Oileides vulpinus* Hübner, [1825]  
*Oileides vulpinus guyanensis* (Mabille & Boulet, 1912)  
*Oileides vulpinus vulpinus* Hübner, [1825]  
*Oileides amazonensis* (E. Bell, 1947)  
*Oileides amazonensis amazonensis* (E. Bell, 1947)  
*Oileides amazonensis renta* (Evans, 1952)

**Aurina** Evans, 1937

*Aurina dida* Evans, 1937

## T7. New World *Pyrgus*, *Heliopetes* and *Heliopyrgus* reclassified

**A note:** According to Balletto, Cassulo & Bonelli (2014:78), *Syrichtus* Boisduval, [1834] is a synonym of *Carcharodus* Hübner, [1819] and not of *Pyrgus* Hübner, [1819] or *Muschampia* Tutt, 1906. We agree, although the type species of *Syrichtus* is not *Papilio malvarum* Hoffmannsegg, 1804 as suggested by Balletto et al., but *Papilio alceae* Esper, 1780, making *Syrichtus* an objective junior synonym of *Carcharodus*. This is because: (1) "malvae" in Hübner ([1803] Samml. eur. Schmett., p. 69, Pl. Pap. 90, Figs 450, 451) is a species known today as *Carcharodus alceae*, and it is a misidentification of *Papilio malvae* Linnaeus, 1758; (2) Boisduval ([1834]: 231) has mentioned *alceae* in his description of *Syrichtus*; and (3) Blanchard has not designated *malvae* sensu Hübner "as an expressly stated misidentification or misapplication" (ICZN Art. 69.2.4.) of *Papilio malvae* Linnaeus. Therefore, this situation falls under ICZN Art. 70.3., and here **we fix *Papilio alceae* Esper, 1780**, i. e., "the taxonomic species actually involved in the misidentification," (Art. 70.3.2.) misidentified as *Papilio malvae* Linnaeus, 1758 "cited as type species" by Blanchard (1845: 348), **as the type species of *Syrichtus* Boisduval, [1834]**.

This taxonomic list is formatted the same way as the Eudaminae list above (see T5. p. 10), except that the names of subspecies are not shown pending further studies. Exclusively Old World species of *Pyrgus* are not included in the list, other genera consist of New World species only. *Heliopetes purgia* Schaus, 1902 is placed in the subgenus *Heliopyrgus* Herrera, 1957 due to similarity in genitalia and COI barcodes.

***Pyrgus*** Hübner, [1819]; TS: =*alveolus* Hübner, [1803] (*malvae* Linnaeus, 1758)  
=‡*Urbanus* Hübner, [1806] (suppr. ICZN Op. 97); TS: *malvae* Linnaeus, 1758  
=*Scelotrix* Rambur, 1858; TS: *carthami* Hübner, [1813]  
=‡*Bremeria* Tutt, 1906 (preocc. *Bremeria* Alpheraky, 1892 [Nymphalidae]); TS: *bieti* Oberthür, 1886  
=‡*Teleomorpha* B. Warren, 1926; TS: *carthami* Hübner, [1813]  
=*Hemiteleomorpha* B. Warren, 1926; TS: *malvae* Linnaeus, 1758  
=*Ateleomorpha* B. Warren, 1926; TS: *onopordi* Rambur, [1842]  
***Pyrgus centaureae*** (Rambur, [1842])  
***Pyrgus ruralis*** (Boisduval, 1852)  
***Pyrgus xanthus*** W. H. Edwards, 1878  
***Pyrgus scriptura*** (Boisduval, 1852)

***Chirgus*** Grishin, **new genus**; TS: *limbata* Erschoff, 1876  
***Chirgus limbata*** (Erschoff, 1876); **new combination**, was in *Pyrgus*  
***Chirgus nigella*** (Weeks, 1902); **reinstated status, new combination**, was in *Pyrgus*  
***Chirgus barrosi*** (Ureta, 1956); **new combination**, was in *Pyrgus*  
***Chirgus fides*** (Hayward, 1940); **new combination**, was in *Pyrgus*  
***Chirgus bocchoris*** (Hewitson, 1874); **new combination**, was in *Pyrgus*  
***Chirgus veturius*** (Plötz, 1884); **new combination**, was in *Pyrgus*

***Burnsius*** Grishin, **new genus**; TS: *communis* Grote, 1872  
***Burnsius notatus*** (Blanchard, 1852); **new combination**, was in *Pyrgus*  
***Burnsius crisia*** (Herrich-Schäffer, 1865); **new combination**, was in *Pyrgus*  
***Burnsius communis*** (Grote, 1872); **new combination**, was in *Pyrgus*  
***Burnsius albescens*** (Plötz, 1884); **new combination**, was in *Pyrgus*  
***Burnsius adepta*** (Plötz, 1884); **new combination**, was in *Pyrgus*  
***Burnsius orcyroides*** (Giacomelli, 1928); **new combination**, was in *Pyrgus*  
***Burnsius chloe*** (Evans, 1942); **new combination**, was in *Pyrgus*  
***Burnsius titicaca*** (Reverdin, 1921); **new combination**, was in *Pyrgus*  
***Burnsius philetas*** (W. H. Edwards, 1881); **new combination**, was in *Pyrgus*  
***Burnsius oileus*** (Linnaeus, 1767); **new combination**, was in *Pyrgus*

**Burnsius orcus** (Stoll, 1780); **new combination**, was in *Pyrgus*  
**Burnsius brenda** (Evans, 1942); **new combination**, was in *Pyrgus*

**Heliopetes** Billberg, 1820; TS: =*niveus* Cramer, 1775 (*arsalte* Linnaeus, 1758)

Subgenus *Heliopyrgus* Herrera, 1957; TS: *americanus* Blanchard, 1852

**Heliopetes americanus** (Blanchard, 1852); **changed combination**

**Heliopetes domicella** (Erichson, [1849]); **changed combination**

**Heliopetes sublinea** Schaus, 1902; **reinstated combination**

**Heliopetes purgia** Schaus, 1902; **new subgeneric placement**

Subgenus *Leucoscirtes* Scudder, 1872; TS: *ericetorum* Boisduval, 1852

**Heliopetes ericetorum** (Boisduval, 1852)

**Heliopetes omrina** (A. Butler, 1870)

**Heliopetes laviana** (Hewitson, 1868)

**Heliopetes libra** Evans, 1944

Subgenus *Heliopetes* Billberg, 1820; TS: =*niveus* Cramer, 1775 (*arsalte* Linnaeus, 1758)

**Heliopetes macaira** (Reakirt, [1867])

**Heliopetes nivella** (Mabille, 1883)

**Heliopetes orbigera** (Mabille, 1888); **reinstated status**

**Heliopetes arsalte** (Linnaeus, 1758)

**Heliopetes marginata** Hayward, 1940

**Heliopetes leucola** (Hewitson, 1868)

**Heliopetes ochroleuca** J. Zikán, 1938

**Heliopetes petrus** (Hübner, [1819])

**Heliopetes chimbo** Evans, 1953

**Heliopetes alana** (Reakirt, 1868)

#### References:

Balletto E, Cassulo LA, Bonelli S. 2014. An annotated checklist of the Italian butterflies and skippers (Papilionoidea, Hesperioidea). *Zootaxa* **3853**: 1-114.

Blanchard CE. 1845. Sixième ordre. Les lépidoptères, pp. 318-410, pls. 16-18. In: Histoire des insectes, traitant de leurs moeurs et de leurs métamorphoses en général, et comprenant une nouvelle classification fondée sur leurs rapports naturels. Paris, Didot. **2**: [iv] + 524 pp., 20 pls.

Boisduval JA. [1834]. Icones historique des lépidoptères nouveaux ou peu connus: collection, avec figures coloriées, des papillons d'Europe nouvellement découverts; ouvrage formant le complément de tous les auteurs iconographes. Paris, Librairie Encyclopédique de Roret. **1**: 251 pp., 47 pls.

## T8. Justification for changes to HesperIIDae genera

For Eudaminae, at least one representative of every genus was sampled for DNA and whole genomic shotgun reads were obtained. Genera were delineated by the cut through the time-calibrated genome-scale phylogenetic tree at about 15 Mya (Fig. 1 in the main text). **Every branch crossed by this cut was defined as a genus.** A genus-group name was either available for at least one of its representatives (46 genera), or a new name for it is proposed here (4 genera, Table 2 in the main text). Composition of each genus was determined by monophyly in the trees constructed from the nuclear genome (Fig. 1) and mitogenomes augmented with COI barcodes (Fig. S1, pp. 91-92 below). As a result, a number of species were transferred between genera (i.e., placed in a genus different from how it was classified prior to this study). In case no DNA data were available for a species possibly involved in the transfer between genera, morphology of genitalia was the primary consideration combined with similarities in facies. See names of genera in red font in the taxonomic list above (pp. 10-27) for the changes.

For other HesperIIDae subfamilies, sampling of species was not as balanced as for Eudaminae, and we refrained from their extensive rearrangements due to possible problems with timing of the tree. The timing may be problematic for the groups with poor phylogenetic sampling. In this study, we focused on monotypic genera to understand their relationships with others and to determine whether they are sufficiently distinct to be valid. We were conservative in our criteria. As a result, we suggest to synonymize three monotypic genera for the reasons given below. Generally, if a monotypic genus renders existing genus non-monophyletic (i.e., it branches "within" another genus in phylogenetic trees), and/or COI barcode distance between monotypic genus and the type species in another genus is less than 8.5%, in conjunction with the similarity in genitalia, we consider the monotypic genus a synonym of that other genus.

*Fuscocimex caecus* Austin, 2008 branches within the genus *Morvina* Evans, 1953 in the mitogenome tree (Fig. S1, pp. 91-92 below) and the difference between COI barcodes of *F. caecus* and *Morvina falisca* (Hewitson, 1878) is 7.5% (49 bp). Therefore, we consider *Fuscocimex* Austin, 2008 a junior subjective synonym of *Morvina*.

*Linka lina* (Plötz, 1883) branches within the genus *Atalopedes* Scudder, 1872 in the mitogenome tree (Fig. S1, pp. 91-92 below) and the difference between COI barcodes of *L. lina* and *Atalopedes campestris* (Boisduval, 1852) is 4.7% (31 bp). Therefore, we consider *Linka* Evans, 1955 a junior subjective synonym of *Atalopedes*.

*Levina levina* (Plötz, 1884), which is the sole species in the genus *Levina* Evans, 1955, is similar to *Ludens ludens* (Mabille, 1891) in COI barcodes (8.4%, 55bp, Fig. S1, pp. 91-92 below), wing pattern (e.g. sharp yellow veins below) and genitalia. Genera *Levina* and *Ludens* were described in the same work by Evans (1955). Being the First Reviser (ICZN Art 24.2.2.), we select *Ludens* as the senior name and treat *Levina* as its junior subjective synonym.

Furthermore, in the mitogenome tree (Fig. S1, pp. 91-92 below), species known before as *Eracon mnemon* (Schaus, 1913) did not group with *Eracon* Godman & Salvin, 1894 (in Achlyodini), but clustered with *Clito* Evans, 1953 (in Erynnini) instead. Phenotypes of *E. mnemon* and *Clito clada* (Evans, 1953) are similar, and Evans (1953: 38) considered them to be subspecies of the same species. Therefore, we transfer *mnemon* from *Eracon* to *Clito*.

Finally, based on the two trees (Fig. 1 in the main text and Fig. S1 below on pp. 91-92), we transferred several genera between tribes and subtribes, judging from their monophyletic placement with the type genera of these tribes and subtribes. These changes are listed in the taxonomic abstract above (p. 3).

### References:

Evans WH. 1953. A catalogue of the American HesperIIDae indicating the classification and nomenclature adopted in the British Museum (Natural History). Part III (Groups E, F, G) Pyrginae. Section 2. London, British Museum (Natural History). v + 246 pp., pls. 26-53;

Evans WH. 1955. A catalogue of the American HesperIIDae indicating the classification and nomenclature adopted in the British Museum (Natural History). Part IV (Groups H to P) HesperIIDae and Megathyminae. London, British Museum (Natural History). v + 499 pp., pls. 54-88.



## T9. Justifications for the change of status from subspecies to species

Status of 30 taxa has been changed from subspecies to species, and the reasons are briefly outlined here. This change is either new ("new status", i.e. the name was originally proposed as a subspecies and was a subspecies prior to this work in the latest taxonomic list above, pp. 28-45), or returning species status to the taxon originally described as a species but treated as a subspecies in the latest taxonomic list ("reinstated status"). The reasons for changes from subspecies to species were: (1) genitalic differences and/or wing shape differences at the level consistent with the differences between taxa treated as species; (2) combination of mitochondrial DNA COI barcode differences above 2% or sympatry with either wing pattern differences, or subtle genitalic differences, or both.

1. ***Hyalothyris infa*** Evans, 1952; new status

Proposed as a subspecies of *Hyalothyris infernalis* (Möschler, 1877) by Evans (1952: 29) who noted consistent wing pattern differences in B.8.1(b). COI barcodes of *infernalis* and *infa* differ by 5.0% (33 differences, Fig. S1). Type series in BMNH inspected and holotype photographed by NVG.

2. ***Hyalothyris neda*** Evans, 1952; new status

Proposed as a subspecies of *Hyalothyris neleus* (Linnaeus, 1758) by Evans (1952: 30) who noted consistent wing pattern differences in B.8.5(c). COI barcodes of *neleus* and *neda* differ by 8.6% (56 bp, Fig. S1). Type series in BMNH inspected and holotype and sole male paratype photographed by NVG.

3. ***Euriphellus lama*** (Evans, 1952); new status, new combination, was in *Dyscophellus*

Proposed as a subspecies of *Dyscophellus phraxanor* (Hewitson, 1876) by Evans (1952: 146) who in D.4.2(a) noted wing pattern differences and genitalic differences that are sufficiently prominent to warrant species status. Type series in BMNH inspected and holotype with its genitalia photographed by NVG.

4. ***Euriphellus mena*** (Evans, 1952); new status, new combination, was in *Dyscophellus*

Proposed as a subspecies of *Dyscophellus phraxanor* (Hewitson, 1876) by Evans (1952: 146) who in D.4.2(c) noted wing pattern and wing shape differences that are sufficiently prominent to warrant species status. Type series in BMNH inspected and holotype with its genitalia photographed by NVG.

5. ***Euriphellus polygius*** (Latreille, [1824]); reinstated status

Treated as a subspecies of *Dyscophellus euribates* (Stoll, 1782) by Evans (1952: 147) who noted wing pattern differences in D.4.4(b) and illustrated genitalic differences in the shape of valva (Plate 23) that warrants species status. Series in BMNH inspected (including Evans' dry dissections) and the type photographed by NVG.

6. ***Cecropterus takuta*** (Evans, 1952); new status, new combination, was in *Urbanus*

Proposed as a subspecies of *Urbanus albimargo* (Mabille, 1875) by Evans (1952: 100) who in C.13.26(b) described wing pattern, wing shape and genitalic differences that are sufficiently prominent to warrant species status. Type series in BMNH inspected and holotype with its genitalia photographed by NVG.

7. ***Cecropterus rica*** (Evans, 1952); new status, new combination, was in *Urbanus*

Proposed as a subspecies of *Urbanus albimargo* (Mabille, 1876) by Evans (1952: 100) who in C.13.26(c) described wing pattern and genitalic differences that are sufficiently prominent to warrant species status. Type series in BMNH inspected and holotype with its genitalia photographed by NVG.

8. ***Cecropterus barra*** (Evans, 1952); new status, new combination, was in *Urbanus*

Proposed as a subspecies of *Urbanus carmelita* (Herrich-Schäffer, 1869) by Evans (1952: 98) who in C.13.22(c) described wing pattern, wing shape (short tail) and genitalic differences that are sufficiently prominent to warrant species status. Holotype and its genitalia inspected and photographed by NVG.

9. ***Telegonus catemacoensis*** (H. Freeman, 1967); reinstated status, new combination, was in *Astraptus*

We sequenced the genome (including mitochondrial genome) of the holotype of this species (Figs. 1 & S1) and found that it falls in the group of species not easily distinguishable by COI barcodes (Hebert et al. 2004). The identity of this

species is now clear due to the genomic sequence available. Among a dozen North American fulgurator-group species, it is likely that *catemacoensis* is distinct from those with older names, so it is resurrected from synonymy with *azul*. Holotype in AMHN inspected and photographed by NVG.

10. ***Telegonus azul*** (Reakirt, [1867]); reinstated status, new combination, was in *Astraptus*

Both the identify of this species and its type series (from Mexico) remain a mystery. However, South American *fulgurator* group species differ in COI barcodes from Mexican species by about 4% and *azul* is the oldest North American name, so it would be a species-level taxon.

11. ***Telegonus heriul*** Mabilite & Boulet, 1912; reinstated status, new combination, was in *Astraptus*

Treated as a subspecies of *Astraptus alardus* (Stoll, 1790) from Hispaniola by Evans (1952: 112) who noted wing pattern differences in C.14.25(c). Closest to Cuban species *Telegonus habana* (Lucas, 1857), it differs from it by 2.9% (19 bp) in COI barcode (GenBank JN270032 & JN270044). Series in BMNH inspected and type photographed by NVG.

12. ***Telegonus cassius*** (Evans, 1952); new status, new combination, was in *Astraptus*

Proposed as a subspecies of *Astraptus galesus* (Mabilite, 1888) by Evans (1952: 118) who noted wing pattern differences in C.14.33(a). COI barcodes of *galesus* and *cassius* differ by 5.2% (34 bp). Series in BMNH inspected and holotype photographed by NVG.

13. ***Narcosius granadensis*** (Möschler, 1879); reinstated status

Mistaking this species identity, Evans renamed it *Astraptus colossus rhoda* (1952: 109) and noted wing pattern differences from nominal *colossus* in C.14.20(b). COI barcodes of *colossus* and *granadensis* differ by 2.9% (19 bp). Holotypes of *N. granadensis* in ZMHB and *N. rhoda* in BMNH inspected and photographed by NVG.

14. ***Narcosius helen*** (Evans, 1952); new status

Proposed as a subspecies of *Narcosius parisi* (R. Williams, 1927) by Evans (1952: 110) who noted genitalic differences in B.14.21(a). COI barcodes of *parisi* and *helen* differ by 3.4% (22 bp). Type series in BMNH inspected and holotype photographed by NVG.

15. ***Epargyreus orizaba*** Scudder, 1872; reinstated status

Mistakenly, Evans renamed this species as *E. socus cama* (1952: 48) and in C.2.8(a) noted prominent wing pattern differences and the distribution gap from *socus*. Series in BMNH inspected and *cama* holotype and its genitalia photographed by NVG.

16. ***Epargyreus dicta*** Evans, 1952; new status

Proposed as a subspecies of *Epargyreus socus* (Hübner, [1825]) by Evans (1952: 48) who noted size and ample wing pattern differences in C.2.8(c). Type series in BMNH inspected and holotype photographed by NVG.

17. ***Epargyreus pseudexadeus*** Westwood, 1852; reinstated status

Treated as a subspecies of *E. socus* by Evans (1952: 49) who in C.2.8(e) & (f) noted prominent wing pattern differences from and sympatry with *socus*. Series in BMNH inspected and type photographed by NVG.

18. ***Epargyreus cruza*** Evans, 1952; new status

Proposed as a subspecies of *Epargyreus exadeus* (Cramer, 1780) by Evans (1952: 49-50) who noted wing pattern and shape differences in C.2.9(a). Type series in BMNH inspected and holotype photographed by NVG.

19 ***Codattractus rowena*** Evans, 1952; new status

Proposed as a subspecies of *Codattractus carlos* Evans, 1952 by Evans (1952: 77) who noted consistent wing pattern differences in C.11.1(b). Partial COI barcodes of *carlos* and *rowena* differ by 2.7%. Type series from BMNH inspected and holotype with its genitalia photographed by NVG.

20. ***Codattractus apulia*** Evans, 1952; new status

Proposed as a subspecies of *Codattractus alcaeus* (Hewitson, 1867) by Evans (1952: 78) who noted consistent wing

pattern differences in C.11.2(b). Partial COI barcodes of *alcaeus* and *apulia* differ by 2.5%. Holotype and paratype from BMNH and their genitalia are inspected photographed by NVG.

21. ***Telemiades contra*** Evans, 1953; new status

Proposed as a subspecies of *Telemiades centrites* (Hewitson, 1870) by Evans (1953: 25) who in E.6.4(b) noted prominent wing pattern differences and possible sympatry in Ecuador. Type series in BMNH inspected and holotype with its genitalia photographed by NVG. Genitalic valva of the holotype has a more developed tooth on harpe directed dorsad and the harpe is shorter in *contra* compared to *centrites*.

22. ***Telemiades brazus*** E. Bell, 1949; reinstated status

Treated as a subspecies of *Telemiades nicomedes* (Möschler, 1879) by Evans (1953: 27) who noted wing pattern differences and genitalic differences in E.6.8(b). Based on genitalic comparison of *T. nicomedes* and *T. meris* syntypes, suggested to be a subspecies of *Telemiades meris* (Plötz, 1886) by Mielke & Casagrande (1998: 990), who noted differences in the shape of valva between *brazus* and *meris*, which in our opinion are indicative of speciation. A series in BMNH, syntypes of *nicomedes* and *meris* in ZMHB and the holotype of *brazus* in AMNH inspected by NVG.

23. ***Oileides guyanensis*** (Mabille & Boulet, 1912); reinstated status

Treated as a subspecies of *Oileides vulpinus* Hübner, [1825] by Evans (1952: 162) who noted wing pattern differences in D.9.3(a). COI barcodes of *vulpinus* and *guyanensis* differ by 3.7% (24 bp, Fig. S1). Series in BMNH and the photograph of the type in MNHP inspected and type photographed by NVG.

24. ***Oechydus evelinda*** (A. Butler, 1870); reinstated status

Treated as a subspecies of *Oechydus chersis* (Herrich-Schäffer, 1869) by Evans (1953: 18) who noted wing pattern differences in E.2(c) and illustrated genitalic differences in Plate 26. COI barcodes of *chersis* and *evelinda* differ by 3.7% (24 bp, Fig. S1). Series in BMNH inspected and type with its genitalia photographed by NVG.

25. ***Cogia goya*** (Evans, 1952); new status, new combination, was in *Typhedanus*

Proposed as a subspecies of *Typhedanus optica* Evans, 1952 by Evans (1952: 66) who noted wing pattern differences and genitalic differences in C.4.6(b). COI barcodes of *optica* and *goya* differ by 2.1% (14 bp, Fig. S1). Type series in BMNH inspected and holotype photographed by NVG.

26. ***Marela tamba*** Evans, 1953; new status

Proposed as a subspecies of *Marela tamyris* Mabille, 1903 by Evans (1953: 19) who noted wing pattern differences in E.4.2(b) and illustrated genitalic differences in Plate 26. COI barcodes of *tamyris* and *tamba* differ by 2.1% (14 bp, Fig. S1). Series in BMNH inspected and holotype with its genitalia photographed by NVG.

27. ***Austinus heroica*** (Evans, 1953); new status

Proposed as a subspecies of *Iliana heros* (Mabille & Boulet, 1917) by Evans (1953: 40) who noted wing pattern differences in E.16.1(a). COI barcodes of *heros* and *heroica* differ by 4.6% (30 bp, Fig. S1). Type series in BMNH inspected and holotype with its genitalia photographed by NVG.

28. ***Chirgus nigella*** (Weeks, 1902); reinstated status, new combination, was in *Pyrgus*

Treated as a subspecies of *Pyrgus limbata* (Erschoff, 1876) by Evans (1953: 215) who noted wing pattern differences in G.1.2(b) and illustrated genitalic differences in Plate 52. COI barcodes of *limbata* and *nigella* differ by 2.1% (14 bp, Fig. S1). Series in BMNH inspected by NVG. Ampulla of the genitalic valva is more robust in *limbata*; *limbata* and *nigella* may be sympatric in Peru.

29. ***Heliopetes orbigera*** (Mabille, 1888); reinstated status

Treated as a subspecies of *Heliopetes macaira* (Reakirt, [1867]) by Evans (1953: 225) who noted wing pattern differences and genitalic differences in G.2.3(c). Series in BMNH inspected by NVG.

30. ***Ephyriades dominicensis*** E. Bell & W. Comstock, 1948; reinstated status

Treated as a subspecies of *Ephyriades brunnea* (Herrich-Schäffer, 1865) by Evans (1953: 205) who noted wing

pattern differences in F.16.3(d). COI barcodes of *brunnea* and *dominicensis* differ by 6.6% (43 bp, Fig. S1). Holotype in AMNH inspected by NVG.

**Abbreviations:**

AMNH: American Museum of Natural History, New York, New York, United States

BMNH: The Natural History Museum [formerly British Museum (Natural History)], London, United Kingdom

MNHP: Muséum National d'Histoire Naturelle, Paris, France

ZMHB: Museum für Naturkunde der Humboldt, Berlin, Germany

**References:**

Evans WH. 1952. A catalogue of the American HesperIIDae indicating the classification and nomenclature adopted in the British Museum (Natural History). Part II (Groups B, C, D) Pyrginae. Section I. London, British Museum (Natural History). v + 178 pp., pls. 10-25;

Evans WH. 1953. A catalogue of the American HesperIIDae indicating the classification and nomenclature adopted in the British Museum (Natural History). Part III (Groups E, F, G) Pyrginae. Section 2. London, British Museum (Natural History). v + 246 pp., pls. 26-53;

Hebert PDN, Penton EH, Burns JM, Janzen DH, Hallwachs W. 2004. Ten species in one: DNA barcoding reveals cryptic species in the neotropical skipper butterfly *Astraptes fulgerator*. Proc. Natl. Acad. Sci. U S A. **101**(41):14812-14817;

Mielke OHH, Casagrande MM. 1998. Papilionoidea e Hesperioidea (Lepidoptera) do Parque Estadual do Morro do Diabo, Teodoro Sampaio, São Paulo, Brasil. Revista brasileira de Zoologia **14**(4): 967-1001.

## T10. Taxonomic discussion

This publication suggests a large number of changes to the current taxonomy of Hesperidae. This discussion explains the rationale behind these changes. As a general rule, we aim for all **taxonomic groups** to be **monophyletic**. Most taxonomic changes we propose rectify monophyly following our phylogenetic analysis of nuclear genomes augmented with the analysis of mitogenomes and COI barcodes (Fig. 1 in the main text and Fig. S1 below, pp. 91-92). Phylogenetic grouping is supported by the nodes with high bootstrap (97% and above, mostly 100%) in the tree based on genomic coding regions constructed with RAxML (see Methods section M5 pp. 66-68 below for details). The same grouping is present in trees constructed from other regions (introns, mitogenomes) and using other methods. Thus, the major phylogenetic groups are robust to the genomic regions and software used for phylogeny construction, and are likely to be correct. Therefore, the proposed monophyly of Hesperidae groups shown in our trees may stand the test of time.

A more contentious issue is the **taxonomic rank** given to a monophyletic group. Because the number of levels in the tree that define monophyletic groups is much larger than the number of taxonomic ranks, the challenge is to select the ones that deserve the rank and assign appropriate ranks to them. Three major considerations are used.

- 1) Monophyletic groups with taxonomic ranks should be **prominent** in the tree, i.e., a group with a rank should be most confidently supported, and the branch leading to the group should be relatively long compared to other branches near it in the tree. Long branch means that the ancestor of the group existed for a long time in the past, i.e., that the group is indeed major and prominent.
- 2) Desire to have **stable taxonomy** calls for the minimal number of changes. Thus the ranks and taxonomic groups should be in reasonable agreement with the ranks and groups used historically in literature.
- 3) It seems best that the ranks are **consistent** with how the ranks are defined in other groups of organisms, at least in closer phylogenetic relatives. For Skippers (Hesperidae) that would be other butterflies and possibly moths. Thus, groups that are considered subfamilies in Hesperidae should have diverged about the same time in the past as the groups considered subfamilies in a different family of butterflies, e.g. Nymphalidae.

We attempted to use these four criteria: **monophyly**, **prominence**, **stability** and **consistency**, to define taxonomic groups and their ranks. We use four family-group (family, subfamily, tribe and subtribe) and two genus-group (genus and subgenus) ranks. Although subfamily rank is common in butterfly taxonomy, subtribe and subgenus are used less frequently and are sometimes synonymized with tribe and genus, respectively. Due to a large number of prominent levels in the phylogenetic tree, we use subtribe and subgenus where appropriate to name most prominent intermediate groups. Below, we reason about each taxonomic level and explain our decisions. We mention alternative interpretations keeping in mind that assignment of ranks to levels is somewhat arbitrary.

**Subfamilies.** We consider skippers to be a family-level taxon Hesperidae and aim at delineating subfamilies. The logic behind our 9 subfamilies is explained in the main text (section "Genomic tree of skippers"). We propose two more subfamilies (Tagiadinae and Pyrrhopyginae) compared to previous treatment. Tagiadinae and Pyrrhopyginae indeed form a monophyletic group with Pyrginae, where they were included previously. They are separated now due to the criteria of prominence (Pyrginae after the inclusion of these two groups is a less prominent taxon, supported only by a short branch), stability (Pyrrhopyginae have been considered a subfamily for a long time before DNA-based phylogenies due to their morphological divergence) and consistency (if Trapezitinae is considered a subfamily, then Tagiadinae and Pyrrhopyginae should too, because they originated prior to Trapezitinae). Alternative consistent treatments may be: 1) Coeliadinae, Euschemoninae, Pyrginae (including Eudaminae, Tagiadinae, Pyrrhopyginae) and Hesperinae (including Heteropterae and Trapezitinae); or 2) Coeliadinae, Euschemoninae, Eudaminae, Pyrginae (including Tagiadinae and Pyrrhopyginae) and Hesperinae (including Heteropterae and Trapezitinae). Tagiadinae diverged from other Pyrginae (Pyrrhopyginae + Pyrginae sensu stricto) at about the same time (if not earlier) as Heteropterae from the rest of Hesperinae (Trapezitinae + Hesperinae sensu stricto), thus subfamily arrangements other than the three discussed above are more arbitrary given current data.

**Tribes.** One of the major goals of this work is to delineate tribes in Eudaminae, and the logic behind current and possible alternative tribal arrangements of Eudaminae is described in the main text. Here, we give justifications for

the tribes in other subfamilies. Tribes in other "Flats" (see p. 6 above) are kept largely unchanged, except the two tribes that are described in this work: Netrocorynini and Jerini (Table 1 in the main text). Netrocorynini diverged from Tagiadini, in which it was placed previously, around 35 Mya, around the same time as Carcharodini and Pyrgini diverged from their ancestor. Therefore the age of this taxon corresponds to tribal level. *Jera* Lindsey, 1925, the sole member of Jerini, is not as distinct from other Pyrrhopyginae and instead of tribal, it could be given a subtribal status. However, placement of *Jera* in Pyrrhopyginae is new and unexpected due to morphological differences. It is sister to all other Pyrrhopyginae and is prominently separated from them in the tree. Given that other groups of Pyrrhopyginae were given tribal status before and they are not nearly as distinct as *Jera*, we treat Jerini as a tribe.

Tribal arrangement in "Grass skippers" (mostly monocot feeders as caterpillars, see p. 7 above) has been challenging and many genera, especially from the Old World, were previously placed Incertae sedis in Hesperinae. We partly attempted to rectify this situation (p. 7 above). Largely Chilean sister genera *Butleria* W. F. Kirby, 1871 and *Argopteron* E. Watson, 1893 diverged from the rest of Heteroptera around 45 Mya. This timing corresponds to a tribe, and a new tribe Butleriini is described in this work (Table 1 in the main text). However, many groups in Hesperinae with formerly tribal rank diverged around 25 Mya and are not that prominent in the tree (e.g. former Moncini and Anthoptini). We consider them as subtribes in a prominent tribe Hesperiini. Interestingly, all New World representatives of Hesperinae formed a monophyletic group in the genomic tree (Fig. 1 in the main text) and Old World groups were diverging prior to the split of the New World Hesperinae. Many of these divergences appeared in the tree more recent than the tribes in the "Flats" and it may be a reflection of recent rapid radiation in monocot-feeding skippers. However, taxon sampling in Grass skippers in this study is rather incomplete, so the timing is not expected to be accurate. For these reasons, we define major groupings in Hesperinae as tribes, and place most Old World Incertae sedis in two tribes: Astictopterini Swinhoe, 1912 (mostly African) and Erionotini Distant, 1886 (mostly Asian). This arrangement makes geographical sense and agrees best with the data, but will be refined in future studies. New World Incertae sedis "Ruby-eye skippers" are placed in a new tribe Pericharini, which is sister to Megathymini Comstock & Comstock, 1895.

**Subtribes.** Major monophyletic groups below tribe and above genus were defined here as subtribes. In Eudaminae, subtribes corresponded to about 30 Mya. Two subtribes (both new, Cephisina and Oileidina) were monotypic, revealing uniqueness of *Cephise* Evans, 1952 and *Oileides* Hübner, [1825]. Another monotypic subtribe described here, Clitina (in Erynnini), stresses uniqueness of *Clito* Evans, 1953. *Clito* was difficult to place phylogenetically prior to this genomic study. We keep subtribal status of the taxa in Pyrrhopyginae that were originally proposed as tribes but given subtribal status when the Pyrrhopyginae were treated as a tribe. Divergence between the Pyrrhopyginae groups and their prominence are insufficient to warrant tribal status. As stated above, New World groups of Hesperinae previously treated as tribes are close to each other, diverged recently (~25 Mya), and together form a prominent group (tribe Hesperiini). These groups were given subtribal status here.

**Genera.** In Eudaminae, we defined genera by a single cut through the tree at about 15 Mya. This cut was chosen to find a compromise between the following considerations: 1) have reasonable agreement with the current classification; 2) keep monotypic genera only for those taxa that are truly distinct and do not have close relatives; 3) minimize the need for naming new genera. For instance, if the cut is placed further back in time, some pairs of distinct and traditional genera such as *Epargyreus* Hübner, [1819] and *Chioides* Lindsey, 1921 or *Oechydus* E. Watson, 1893 and *Nerula* Mabille, 1888 would need to be merged into one (in each pair, Fig. 1 in the main text and below), which is not desirable. If the cut is placed closer to present time, some morphologically compact genera such as *Udranomia* A. Butler, 1870 and *Urbanus* Hübner, [1807] (consists only of green tailed species in this work, see the list on pp. 17-18 above) may need to be split into genera, some monotypic genera with close affinities to other genera would not be merged, and additional new genera would need to be named, many of which would be either monotypic or consist of a small number of very close relatives. Furthermore, genera defined by our cut at about 15 Mya indeed mostly correspond to prominent phylogenetic groups that stand out from the rest. Nevertheless, dating of the tree is not perfect and the nodes may shift around when additional taxa are added and better dating methods are developed. These shifts may result in additional changes. For instance, the cut at 15 Mya keeps monotypic *Nicephellus* Austin, 2008 as a valid genus. However, it is closely related to *Salatis* Evans, 1952, as

evidenced by wing shape and genitalic similarity in addition to similarity in DNA. Further studies are needed to clarify the status of *Nicephellus*.

Only several changes were made to genera outside Eudaminae. We synonymize three monotypic genera closely related to other genera (see T8 above, p. 48). Five new genera are described (Table 2 in the main text). Two of them (*Chirgus* and *Burnsius*) solve a long-standing problem about paraphyly of *Pyrgus* Hübner, [1819] with respect to *Heliopetes* Billberg, 1820 and *Heliopyrgus* Herrera, 1957 (also see pp. 46-47 above). A new genus *Tiana* includes two Carcharodini species that were formerly placed in *Tosta* (now in Achlyodini) and would be left without a genus in Carcharodini. A new genus *Duroca* is described for *Lerema duroca* (Plötz, 1882), which is not monophyletic with *Lerema*, not closely related to any other skipper and possesses distinct genitalic valva shaped like a hook. Finally, a new genus *Tekliades* is proposed for *Coeliades ramanatek* (Boisduval, 1833), which stands far out from its relatives in phylogenetic trees and makes *Coeliades* polyphyletic (Fig. S1, pp. 91-92 below). While some of these new genera are either monotypic or include small number of species, these genera are necessary to resolve problems with non-monophyletic taxa noticed in this study.

**Subgenera.** In some Eudaminae genera, we see prominent phylogenetic clusters of species that are meaningful to treat as subgenera. Most of these clusters are characterized by morphological synapomorphies. For instance, *Codatractus* Lindsey, 1921 species fall into two phylogenetic groups, with and without hindwing tails. The group without the tails contains the type species of the genus, and the group with the tails is named here as a new subgenus *Caudotractus* (see Table 2 in the main text). *Ectomis* Mabille, 1878 (as treated here, see pp. 24-25 above) includes a group of species that contains *E. asine*. This group is sister to the rest of *Ectomis* and is more prominently separated from them than the subgroups within the rest of *Ectomis* from each other. This group is named here as a new subgenus *Asina*. Names already existed for some other subgenera, for instance those in a large genus *Cecropterus* Herrich-Schäffer, 1869. In addition to the nominotypical, there are two others: *Thorybes* Scudder, 1872 and *Murgaria* E. Watson, 1893. The name *Thorybes* has been mostly used as a valid genus, but it is not prominently distinct from other members of *Cecropterus*, neither genetically nor morphologically. However, under alternative treatments, at least some of the subgenera we propose here can be considered as genera, because the rank remains a subjective prerogative of researcher. Future studies and consensus opinion that emerges among Lepidopterists will decide on the ranks of monophyletic groups we outlined in this work. Note that we have not revised the names for subgenera in other subfamilies of HesperIIDae.

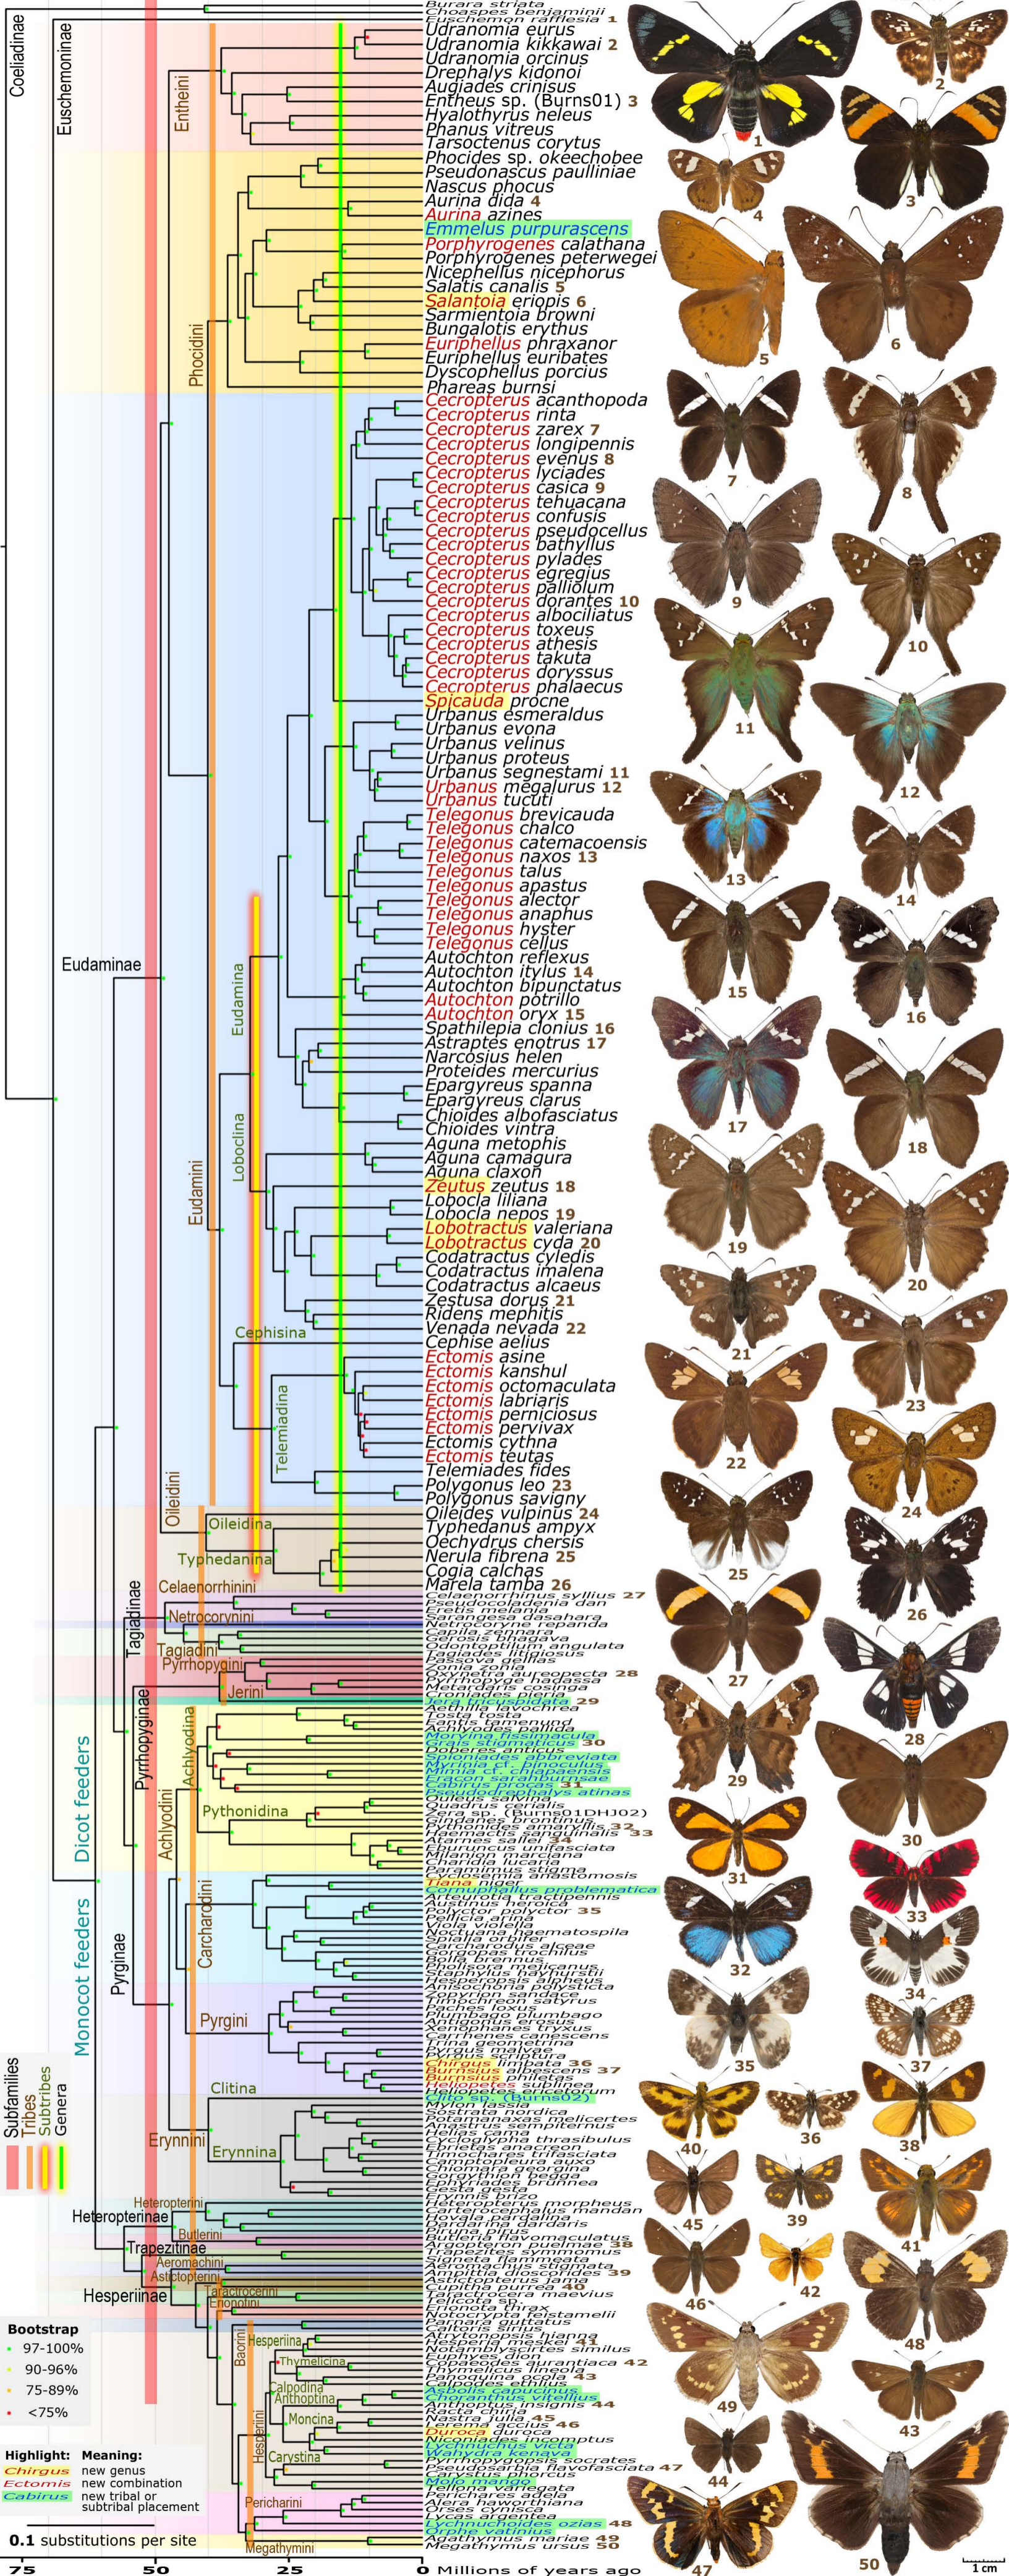



## Expanded legend to Figure 1 from the main text (and shown above, modified)

**Time-calibrated genomic tree of HesperIIDae.** The tree was constructed from nuclear gene coding regions of specimens from 250 representative species and was dated using the procedure described in Methods below (pp. 67-68). Data for 250 specimens used in the tree are given in Table S1 (below, pp. 72-74). Time scale is shown at the bottom and thin gray vertical lines cross the tree every 10 million years. Thicker colored vertical lines delineate major taxonomic groups: red - subfamilies, defined by the time interval between about 50 and 52 Mya; orange (broken in several places) - tribes; yellow with red shading (only for Eudaminae) - subtribes, and green with yellow shading (only for Eudaminae) - genera. Bootstrap values are shown by the nodes as colored dots: green  $\geq 97\%$ , lime  $\geq 90$  and  $< 97\%$ , orange  $\geq 75$  and  $< 90$ , and red  $< 75\%$ . New genera described in this work are shown in red font and highlighted yellow. Genera involved in new genus-species combinations are in red font. Taxa placed in a different tribe or subtribe in this work compared to the previous taxonomic list are in blue font and are highlighted green. Segments of the tree corresponding to different tribes are highlighted in different colors. Names of subfamilies (black), tribes (brown) and subtribes (green) are shown by the branches of the tree. The major split into dicot and monocot feeders (as caterpillars) is shown (there are several feeding exceptions due to convergence, e.g. some *Spicauda* species are monocot feeders). Representative HesperIIDae species are illustrated to the right of the tree to show diversity in the family and are associated with names in the tree by numbers in brown font. Some sequenced specimens were not identified to species for various reasons and are denoted by "sp." (species) followed by a temporary code (e.g. Burns01, placed in parenthesis) by which this species is currently referred to in literature and databases. Species placement of *Phocides* sp. *ockeechobe* is currently unclear (a subspecies of *P. pigmalion* (Cramer, 1779), of other taxa, or a species of its own). Species close to, but possibly distinct from a certain species are marked by "cf." (Latin: confer) between genus and species name.

# Methods

## M1. Sample collection and genomic DNA extraction

We preserved different parts of the butterfly specimen for DNA extraction depending on the source and the condition of the sample. For freshly collected specimens, we removed the head of the specimen and preserve in alcohol for DNA extraction. If the head provided insufficient materials, we dissected the chest muscle. For old and dry samples from insect collections, we used either legs or a whole abdomen (dropped into lysis buffer for overnight incubation at 56 °C, and then transferred into 10% KOH for genitalia dissection) to extract genomic DNA with Macherey-Nagel (MN) NucleoSpin® tissue kit following the manufacturer's protocol. Genomic DNA was eluted in a total volume of 30-50 µl QIAGEN AE buffer, and the concentration of DNA was measured by Promega QuantiFluor® dsDNA System. The concentration of genomic DNA ranges from 0.01 to 2.5 ng/µl for legs, and from 0.005 to 30 ng/µl for abdomens, depending on specimen age and storage conditions.

## M2. Sequencing library preparation protocol

### M2.1. Paired-end library preparation protocol

NEBNext® Ultra™ II DNA Library Prep Kit for Illumina® was used for paired-end library preparation. Starting Material is 5 - 250 ng of fragmented DNA.

#### *A. DNA Fragmentation*

Depending on the genomic DNA quality (as determined by gel electrophoresis), some of the genomic DNAs were fragmented using a Covaris focused ultrasonicator S2 or S220 to 400 bp according to manufacturer's instructions, and then purified with 1.8X AMPure XP beads. DNA samples from some old dry samples are already degraded with smears ranging from <50 bp to 500 bp did not go through fragmentation.

#### *B. End Preparation*

1. Mix the following components in a sterile nuclease-free tube.

|                                  |        |
|----------------------------------|--------|
| End Prep Enzyme Mix              | 1.5 µl |
| End Repair Reaction Buffer (10X) | 3.5 µl |
| Fragmented DNA                   | 25 µl  |
2. Place in a thermocycler, with the heated lid on, and run the following program:
  - 20°C for 30 min
  - 65°C for 30 min
  - Hold at 4°C

#### *C. Adaptor Ligation*

If DNA input is < 10 ng, dilute the NEBNext Adaptor for Illumina (provided at 15 µM) 10-fold in 10 mM Tris-HCl or 10 mM Tris-HCl with 10 mM NaCl to a final concentration of 1.5 µM, use immediately.

1. Add the following components directly to the End Prep reaction mixture and mix well.

- |                              |        |
|------------------------------|--------|
| NEBNext Adaptor for Illumina | 2.5 µl |
| Blunt/TA Ligase Master Mix   | 15 µl  |
| Ligation enhancer            | 0.5 µl |
- Incubate at 20°C for 15 minutes in a thermal cycler.

#### D. USER excision

- Add 2.5 µl USER™ enzyme to the ligation mixture from previous step.
- Mix well and incubate at 37°C for 20 minutes.

#### E. Cleanup of Adaptor-ligated DNA

- Move AMPure XP Beads to room temperature for 20 min. Vortex beads to resuspend.
- Add 1.2X resuspended AMPure XP Beads to the ligation reaction. Mix well.  
For samples less than 10 ng or smaller than 100 bp, we used 1.6X Ampure XP beads we prepared in-house with higher (30%) concentration of PEG.
- Incubate for 10 minutes at room temperature.
- Quickly spin the tube and place it on an appropriate magnetic stand to separate beads from supernatant. After the solution is clear (about 5 minutes), carefully remove and discard the supernatant.
- Add 200 µl of 80% freshly prepared ethanol to the tube, resuspend well. Incubate at room temperature for 30 seconds, and move plate to magnetic rack wait till clear, then carefully remove and discard the supernatant.
- Repeat Step 5 once.
- Air dry the beads.
- Remove the tube/plate from the magnet. Elute the beads twice with 17 µl TE buffer.
- Mix well by pipetting up and down. Incubate for 5 minutes at 37°C.
- Quickly spin the tube and place it on the magnetic stand.
- After the solution is clear (about 5 minutes), transfer 15 µl of the elution to a new PCR well plate.
- Elute a 2nd time with 10 µl, to a final volume of 25 µl.
- Measure concentration using Promega QuantiFluor® dsDNA System with 1 µl.

#### F. PCR Enrichment of Adaptor Ligated DNA

- Mix the following components in a sterile nuclease-free tube:

|                                                                         |       |
|-------------------------------------------------------------------------|-------|
| Adaptor Ligated DNA Fragments & H <sub>2</sub> O (with up to 24 ng DNA) | 23 µl |
| Index Primer                                                            | 1 µl  |
| NEBNext Q5 Hot Start HiFi PCR Master Mix                                | 25 µl |
| Universal PCR Primer                                                    | 1 µl  |
- PCR with the following conditions. We use 6 cycles if 24 ng template DNA is used, and we increase it with less amount of DNA.

| <i>CYCLE STEP</i>    | <i>TEMP</i> | <i>TIME</i> | <i>CYCLES</i> |
|----------------------|-------------|-------------|---------------|
| Initial Denaturation | 98°C        | 30 seconds  | 1             |
| Denaturation         | 98°C        | 10 seconds  | 6–15*         |
| Annealing/Extension  | 65°C        | 90 seconds  |               |
| Final Extension      | 65°C        | 5 minutes   | 1             |
| Hold                 | 4°C         | ∞           |               |

### *G. Cleanup and size selection of PCR Amplification*

1. Add water to adjust the final volume of each reaction product to 100  $\mu$ l.
2. Vortex AMPure XP Beads to resuspend.
3. Add 0.625X of resuspended AMPure XP Beads to the PCR reactions. Mix well by pipetting up and down at least 10 times.
4. Incubate for 10 minutes at room temperature.
5. Quickly spin the tube and place on an appropriate magnetic stand to separate the beads from the supernatant. After the solution is clear (about 5 minutes), carefully transfer the supernatant containing your DNA to a new well plate. Discard the beads that contain the unwanted large fragments.
6. Add 0.375X resuspended AMPure XP Beads for the 2nd time to the supernatant, mix well and incubate for 10 minutes at room temperature.
7. Quickly spin the tube and place it on an appropriate magnetic stand to separate the beads from the supernatant. After the solution is clear (about 5 minutes), carefully remove and discard the supernatant that contains unwanted DNA (to the plate with first time beads). Be careful not to disturb the beads that contain the desired DNA targets (Caution: do not discard beads).
8. Add 200  $\mu$ l of 80% freshly prepared ethanol to the tube while in the magnetic stand. Incubate at room temperature for 30 seconds, and then carefully remove and discard the supernatant.
9. Repeat Step 8 once.
10. Air dry the beads for 5 minutes. Caution: Do not overdry the beads. This may result in lower recovery of DNA target.
11. Elute the the beads with 20  $\mu$ l of 10 mM Tris-HCl or 0.1 X TE. Mix well on a vortex mixer or by pipetting up and down. Incubate for 5 minutes at 37°C.
12. Quickly spin the tube and place it on a magnetic stand. After the solution is clear (about 5 minutes), transfer 18  $\mu$ l to a new well plate.
13. Elute a 2nd time with 19  $\mu$ l, to a final volume of 37  $\mu$ l.
14. Measure libraries concentration with 2  $\mu$ l.

### *F. Check library size on 2% E-gel with a 100bp ladder*

## **M2.2. Preparation for sequencing on the Illumina Hiseq X ten platform**

The concentration of each library was quantified using Promega Quantus™ fluorometer with Promega QuantiFluor® dsDNA system, and the library size was estimated using gel electrophoresis. These two measurements were used to estimate the molar concentration of each library. The relative volume of each library was determined by the needed fraction and the molar concentration of the library. We typically target 10X coverage for each Eudamine skipper sample, which is 5 Gbp data. We used Hiseq X ten sequencing service from Genewiz, which typically produce 130 Gbp data per lane, and therefore, we can pool 26 libraries of Eudamine skippers in one lane.

## M3. Nuclear and mitochondrial protein-coding gene assembly

### M3.1. Processing of sequencing reads

NGS reads were processed sequentially by AdapterRemoval software (version 1.5.4) (1) to remove reads contaminated by adapters and oligos used in the sequencing reactions, and to trim low-quality (quality score < 20) portions at both ends. Below is the command and parameters used for paired-end libraries:

```
> AdapterRemoval --file1 [R1.fq] --file2 [R2.fq] --basename [sampleID] --trimns --trimqualities --minquality 20 --pcr1 [Adaptor1] --pcr2 [Adaptor2] # [R1.fq] and [R2.fq] are the paired-end FASTQ format sequencing reads, [sampleID] is the sample identification number, [Adaptor1] and [Adaptor2] are the adapter sequences used for the sample.
```

### M3.2. Preparation for protein-coding gene assembly

We had attempted to perform a BWA-GATK-based mapping assembling strategy as described in (2). However, due to the long evolutionary distance between our target species and available reference genomes, such BWA-GATK-based approach results in poor-quality genome assemblies, most of which cover only 10% ~ 20% of the reference genome (data not shown). Since the protein-coding regions still tend to be more conserved and can be aligned better with the help of protein sequences, we limited ourselves to exons and assembled coding sequences in the genomes.

The increased sensitivity of the protein-based approach permitted a high-quality alignment among our samples from diverse groups. However, this approach might have problems when reads from different paralogs are mapped to a single protein. To avoid mapping of paralogous reads, we applied cutoffs of sequence identity of the mapped reads for each exon. The two available genomes, *Lerema accius* (3) and *Cecropterus lyciades* [formerly in *Achalarus*] (4) were used to estimate these cutoffs. We performed reciprocal BLAST searches between the exons of these two reference genomes to identify the orthologous exons as follows:

1. Run TBLASTN (5) to perform a search using the amino acid sequences of exons in one species against the nucleotide sequences of exons in another species. We disabled the low complexity sequence filter in TBLASTN by '-seg no'.

2. In the TBLASTN result, we calculated the sequence identity and E-value to the query exon for each hit and identified the lowest E-value hits for every query. If the statistics of other hits are comparable (difference in sequence identity < 5% and difference in log(e-value) < 5), we would also include them into the best hit set of the query.

3. To remove False Positives among the best hits for each query exon, we applied several filters: (a) the hits have to show e-value < 0.001 or sequence identity to the query > 90%; (b) discard hits with identity to query less than 50%; (c) discard ambiguous hits, which are detected as the best hit to multiple query exons, or multiple locations of the same query exon.

4. We repeated the same procedure using the exons of another species as the query and consider two exons from the two genomes to be candidate orthologs if they are among the best hits of each other.

5. As some short exons might fail the filtering steps, we utilized the synteny of exons to rescue some orthologous exons. Briefly, if one protein has more than half of its exons mapped to the exons of a

protein in another genome, we would omit the filters in 3. when examining if the remaining unmapped exons are orthologous to each other.

In total, we have 92237 exons in *Cecropterus* and 102628 exons in *Lerema*. By our reciprocal BLAST procedure, we detected 60179 orthologous exons (1653 exons were rescued by exon synteny). These orthologous exons are the set of exons included in the alignment for phylogenetic study; the sequence identity (minus 5% to allow fluctuation in sequence similarity) between *Cecropterus* and *Lerema* reference genomes would be used as the cutoff to filter out paralogs and contaminations in mapping.

### M3.3. Protein-coding sequence assembly for phylogenetic study from sequencing reads

To avoid potential bias from the reference genome in the phylogenetic signal, we used exons from *Lerema*, which could be considered as an outgroup to Eudaminae samples, as the reference protein set for TBLASTN mapping. Below is the detailed procedure:

1. Transfer the FASTQ format into FASTA format and format it as BLAST database.
2. Perform TBLASTN search using *Lerema* exons as queries. In the search, we turned off the low complexity filter by '-dust no' and allowed more hits by '-max\_target\_seqs 50000000'.
3. Apply filters based on BLAST output statistics by requiring: (a) hit coverage  $\geq 60\%$ , (b) identity to the query  $\geq 50\%$ , and  $\geq$  highest identity among reads from all samples – 20 %. (c) E-value  $< 0.001$  or identity to the query  $\geq 90\%$ .
4. Utilize the alignment between two reference genomes in the section M3.2 to filter out reads with sequence identity less than that between *Cecropterus* and *Lerema* by more than 5% in the same region. If the corresponding region is not present in the *Cecropterus-Lerema* alignment, the full *Cecropterus-Lerema* alignment will be used to estimate the identity cutoff.
5. Filter out the ambiguous hits that are mapped to multiple query exons, or multiple locations of the same query exon.
6. Assemble the aligned reads for each specimen with the following procedure:
  - a. Compute the dominant nucleotide at each position. If the frequency of the dominant nucleotide is less than 80%, we are not confident about whether the observed polymorphism is due to population diversity or data quality issues, and we mark them as potential bad positions.
  - b. Check the enrichment of such potential bad positions using a 50bp sliding window. If there are more than 9 potential bad positions in a window, filter out this window.
  - c. Compute the average read coverage of the exon and filter out exons whose sequencing depth is less than 1.5, to ensure that most of the exons should be supported by at least two sequencing reads.
7. Finally, we used the exon set defined in section M3.2 and concatenate the assembled exons into a single FASTA sequence for phylogenetic studies

### M3.4. Coding sequence assembly for speciation hotspot studies

Methods described in section M3.3 are aimed to remove all possible noise and bias to study phylogeny. Therefore, we applied extensive filtering to exclude any possible contamination, which resulted in fewer but higher-quality positions. However, when we study the function of genomes, especially the correlation between phenotypes and genotypes, we want to obtain the most complete

protein sets. For this purpose, we introduced the following modifications to the protocol described in M3.2 and M3.3:

1. We searched the exons of *Cecropterus lyciades* against the complete genome, instead of exons, of *Lerema* to obtain the Cecropterus-Lerema alignment. This modification reduces the influence from the inconsistency in the two sets of gene annotations.
2. We used *Cecropterus lyciades* as the reference genome to perform TBLASTN.

Using such approach, we obtained 83265 orthologous exons (38% more than the procedure in M3.2) from 17410 genes, which consist of 19,191,516 nucleotide positions.

### M3.5. Assembling mitochondrial protein-coding genes

We took the 13 mitochondrial proteins from *Lerema* mitogenome and assembled these sequences for all samples. The assembly strategy for mitochondrial genes is almost identical to that for nuclear genes, with a few exceptions:

1. In TBLASTN search, we specified '-db\_gencode 5' to switch to the invertebrate mitochondrial codon table.
2. We increased the read coverage cutoff from 1.5 to 3, as mitochondrial genomes generally have much higher coverage than the nucleus genome.

Finally, we obtained the concatenated mitogenome consisting of 11196 aligned positions for our samples (average read depth per gene is 634.36)

### M3.6. Special procedure to handle extremely poor samples

Some mitogenome sequences include heterogeneous positions with multiple possible nucleotides. Although there is a chance that these represent intrinsic mitogenome heterogeneity, it is more likely, especially for old samples, that these samples are contaminated by other species. We fix such mitochondrial genomes by reference-guided *de novo* assembly. Briefly, from the alignment of the query protein and the reads of one sample, we linked all the reads with at least 10 bp identical overlapping regions together to form the local pitches. All the pitches then were linked together in all possible combinations to generate a pool of possible sequences. Then we mapped the reads to the sequence pool and picked the sequence of highest read depth as the final mitogenome assembly. Note that such method would only be applicable for the cases where the contamination is minor.

For the highly contaminated samples, we need to first identify the source of contamination and then filter the reads that are more similar to the sequence of the contaminating species. One such highly contaminated case is a sample of *Orphe vatinius* (sample ID NVG-2761). The mitogenome tree and nuclear tree showed different placement in the tree (data not shown). To investigate this problem, we used BWA (6) to map all reads to all available mitogenomes/genomes in our dataset and detected contamination in mitogenome reads from *Parnara naso* (sample ID NVG-7819 and NVG-7781). To fix this contamination, we discarded the reads that are 100 % identical to the *Parnara* mitogenome, or contain no more than 2 different base pairs from *Parnara*, and show higher similarity (by more than 2 bp) to *Parnara* than to *Pseudorphe pyrex* (sample ID NVG-15022B04, close relative of *Orphe vatinius*). This filtering step removed 38% of the reads mapped to the mitogenome and the subsequent assembled mitogenome showed a consistent phylogeny as the nuclear genome.

## M4. High quality COI barcode assembly strategy

The COI barcode lies within the mitochondrial gene encoding cytochrome c oxidase I and is the most widely used markers for biological species identification (7). To ensure the quality of the assembled barcodes, we performed both reference-based and *de novo* assembling methods to obtain COI barcode sequences.

### M4.1. Preparing database of barcodes

We downloaded all the COI barcodes in BOLDsystems (8) and reduced redundancy to keep only one most complete barcode per species. For those species whose longest barcode is still less than 90% complete, we performed the following procedure to increase the completeness.

1. Sorted the barcodes of the same species by the completeness and take the most complete sequence as a start.
2. Use the subsequent sequence in the sorted list to fill up the missing positions.
3. Iteratively repeated step 2 until the end of the list or till completion of the entire barcode.

To avoid problem of mapping sequencing reads to both ends of the barcode sequences, we extended the ends of the barcodes by 20bp on each end. The sequence added before 5'-end is 'ACTAATCATAAAGATATTGG' and that after 3'-end is 'TGATTTTTTGGTCATCCAGA'. We add the same sequences to all specimens because these regions are well-conserved among different species and are used as primers to amplify the barcode region.

### M4.2. Selecting barcode baits

To construct COI barcodes, we first needed to extract sequencing reads coming from the COI barcode regions. We picked a "primary bait" sequence as the known COI barcode of the same or closely-related species. In cases where butterfly experts failed to identify the species of the sample or the "bait" identified very few sequencing reads (possibly due to mis-identification), we mapped the sequencing reads to the entire barcode dataset using BWA and assigned the sample to the species that attracted most of the sequencing reads. In several cases, the barcode that attracted the most sequencing reads is not from the correct species, as contaminating species could have higher abundance than the real reads from a specimen. Therefore, all the species identified by such method were examined carefully by butterfly experts.

Using the expected barcode of a species as the bait would create a strong bias towards the assumed sequence. Therefore, we selected multiple "secondary baits" for each sample so that the search can become more sensitive and that we have a way to check the consistency of the extracted reads by different baits. We select additional baits using the following protocol:

1. Run BLAST against the barcode database using the bait barcode.
2. Round the identity value into integer and ordered the identified barcodes primarily by the rounded sequence identity and secondarily by the BLAST e-value.
3. Took barcodes from the sorted list until the sequence identity drops to 90% or five barcodes are selected, whichever occurs first.



We used the BWA to map sequencing reads of each specimen to the primary and secondary barcode baits. For some cases where all available baits were too remote from the species of interest, we would perform a protein-based search by TBLASTN. We used the COI region from *Lerema accius* as the protein baits for all samples of our study.

### M4.3. Checking consistency and removing contamination

We performed a consistency check for the reads extracted with different baiting barcodes to filter out those that map ambiguously to different regions in different bait barcodes. Note that some reads might not map to all the barcodes and some reads might contain both consistent and ambiguous mapping regions. In such cases, we obtained the consistent portion of the reads (not requiring mapping to all baits) and masked the ambiguous regions.

To filter the potential contamination, we used BWA to map all the unambiguously-mapped reads obtained in the prior step to our barcode database. We compared the identity between the read and the bait barcodes to that between the read and other barcodes from the database; we defined contaminating reads as the those that have higher identity to other species than to the expected species and higher identity to other barcodes than the average identity of all the barcode baits.

### M4.4. Reference-based assembly

After removing contamination, the resulting reads were assembled in two approaches. In the first “consensus” approach, we computed the frequency of nucleotides in every position. The nucleotide with a frequency larger than 80% was assigned to the position (otherwise ‘N’ is assigned in the position). To check the quality of BWA mapping, we filtered reads with less than 50% or less than 40bp mapped by BWA to the primary bait and repeated the procedure. Note that such filtering could potentially remove many short reads for those ancient samples; therefore, we kept both of the barcodes and manually inspected the sequences if differences were observed. In the second “threading” approach, we sort the reads by the starting sites of the alignment between the read and the bait barcode. After taking the first read in the sorted list, we went through the list to create a set consistent reads by requiring each newly added read to be identical to the consensus sequence of all the previously identified consistent reads in the overlapping region of at least 6bp.

The filtering step in M4.3 could be too stringent for a remote bait barcode. In cases where stringent filtering resulted in incomplete barcode sequences, we performed a rescue step to recover some good reads. We used the barcode generated by the above first approaches and rescued those reads with more than 20bp overlapping with the assembled barcode and no more than 1bp mismatch to the barcode. This process was performed iteratively to update the assembled barcode.

### M4.5. *De novo* assembly

We performed de novo assembly for those reads retrieved using DNA baits, as well as protein-baited reads, if necessary. We used platanus (9) assembler (version 1.2.4) with the following commands:  
> platanus assemble -o [sampleID] -f [fastaInput] # [sampleID] is the identification number of the sample; [fastaInput] is the fetched reads in FASTA format

```
> platanus scaffold -o [sampleID] -c [sampleID]_contig.fa -b [sampleID]_contigBubble.fa -IP1 [R1.fq], [R2.fq] # [R1.fq] and [R2.fq] are the paired-end reads in FASTQ format.
```

We compared barcodes constructed by (a) *de novo* approach on DNA-baited reads, (b) *de novo* approach on protein-baited reads, if applicable, (c) reference-based consensus methods, and (d) reference-based threading methods to check for consistency. Any inconsistent nucleotides would be carefully inspected by human experts.

## M4.6. Barcode validation

In addition to the internal consistency between different methodologies, we compared the barcodes against existing PCR barcodes of the same sample, if any, and all the barcodes in our database described in M4.1. We would perform a manual check in the following scenarios:

1. The PCR barcode cannot be aligned to the assembled barcode by BLASTN (default parameters).
2. There was any difference between the PCR barcode and the assembled barcodes of the exact sample.
3. The assembled barcode shows higher similarity to a barcode of a different species than that of the expected species.

Furthermore, we would order all the assembled barcodes by phylogeny and curated the singular nucleotides or amino acids that don't show up in the barcodes of their closely related species, by either PCR the barcode segment or manually studying the polymorphism in the sequencing reads.

## M5. Phylogenetic analysis

### M5.1. Construction of nuclear and mitochondrial genome alignments

Construction of nuclear alignment was trivial, as all reads were mapped to the same reference genome: we simply concatenated the alignments for each exon. However, construction of mitochondrial genome was not trivial, as we needed to incorporate mitogenomes from multiple sources including:

1. Full mitogenome downloaded from NCBI (Table S3)
2. The COI gene region from the dataset in reference (10)

We used the 13 *Lerema* mitochondrial proteins, which were used to assemble our own mitochondrial coding sequences, to search against the mitogenomes in category 1 by TBLASTN. The resulting alignment was used as an intermediate to add these external mitogenomes to our alignment. Similarly, we aligned the COI genes in category 2 to the COI protein from *Lerema*, which was used as an intermediate to add them to our alignment.

The barcode sequences prepared with protocol described in M4 were aligned by MAFFT (11) using the following command:

```
> mafft --localpair --maxiterate 100000 --thread 30 --reorder [input.fa] > [output_alignment.fa]
```

We detected the location of the barcodes in the mitogenome alignment and replaced that region with this barcode alignment. Due to the dedicated work in M4 to remove all possible contamination, the

barcode alignment is expected to have higher quality than the initial barcode region in the mitochondrial alignment.

## M5.2. Construction of phylogenetic trees

The mitochondrial (+barcodes) gene alignments (292 mitogenomes and 249 barcode regions) were processed using RAxML (12) (model: GTRGAMMA) to build a maximum-likelihood tree. The concatenated nuclear gene alignments (10,230,578 positions after filtering positions with over 50% gaps) were also processed using the same method and model.

To evaluate the confidence of the nuclear tree, we split the concatenated alignment of nuclear coding sequences into 100 partitions with about 0.1 million positions in each partition. RAxML (model: GTRGAMMA) was applied to each partition. However, the lack of positions in each partition lead to low support values for the internal branches near the leaves. To address this problem, we processed the dataset to generate larger partition containing 10% of the genome in two ways:

1. Using a sliding window of 1,023,058 positions (10% of the genome) to partition the genome with the step of 204612 positions (2% of the genome). This resulted in 50 partitions.
2. Randomly sampling (with replacement) 1,023,058 positions from the concatenated alignments of the nucleus genome. This resulted in another 50 partitions.

We applied RAxML on these 100 partitions and produced a consensus tree using SumTrees (<https://pythonhosted.org/DendroPy/programs/sumtrees.html>). The command for SumTree is:

```
> sumtrees.py -s consensus -f0.1 -p -d0 [input.tre] --output-tree-filepath=[output.tre] -r -F newick --suppress-annotations # [input.tre] is the file combining all the bootstrap trees.
```

To generate bootstrap replicates for mitogenome tree, we partitioned the alignment into two sub-alignments: the alignment of just COI barcode regions and one excluding the COI barcode regions. We performed standard bootstrapping (with replacement) independently on these two partitions and concatenated the sampled alignments to yield a bootstrap replicate. We ran RAxML on 100 such replicates and used the following SumTree command to assign confidence to nodes in the tree:

```
> sumtrees.py -f0.1 -p -d0 [input.tre] --target=[RAxML_all.tre] --output-tree-filepath=[output.tre] -r -F newick --suppress-annotations # [input.tre] is the trees built by RAxML for the 100 bootstrap replicates, [RAxML_all.tre] is the tree built by RAxML for the full mitogenome sequence.
```

In addition to the maximal likelihood approach, we also performed coalescent-based estimation using ASTRAL (13) (version 5.5.9) on individual gene trees. We obtained 10811 gene alignments with more than 50 samples included and less than 50% gap fraction. We run RAxML on individual gene alignments and summarized the RAxML trees using the following command:

```
> java -jar astral.5.5.9.jar -i [in.tree] -o [out.tre] # [in.tree] is the file of all gene trees (one tree per line) and [out.tre] is the output ASTRAL tree.
```

We computed the time-calibrated (i.e., dated) tree based on the summarized bootstrap tree generated by RAxML. Briefly, we assumed a constant evolutionary rate for every branch and rescaled the branches in the RAxML tree to obtain constant length from the leaf to the root. Detailed procedure is described below:

1. We took the largest branch length from the root to the leaves as the target branch length. Every branch was rescaled to the target branch length (TBL).

2. From the root, we iteratively repeated the following steps to rescale each internal branch to the expected length:
  - a. at an internal node, subtract the branch length from this node to the root from the TBL to obtain the targeted remaining branch length (TRBL)
  - b. identify the best path to a leaf from current node as the path with the largest number of internal nodes and computed the branch length of this best path, namely, current remaining branch length (CRBL)
  - c. compute the scaling factor as the ratio of TRBL vs CRBL
  - d. multiply the scaling factor with the branch length for each branch in the best path, and update the branch length
  - e. go to the children nodes and repeat step (a) until reaching the tips of the tree.

Time axis was added to the tree based on fossil calibration carried out in recent studies (14)(15).

### M5.3. Detection of diagnostic nucleotide characters

To support the phylogenetic groups, we detected the distinguishing nucleotide characters that were mutated and maintained in the groups. We would like to find the characters that are (a) conserved within the group, (b) conserved in the rest species outside the group, and (c) different between the group and the rest sequences. Some of our samples are of poor quality and contained lots of gaps in the final alignment. To avoid possible mis-identification due to the missing characters, we constrained our positions to filter out positions dominated by gaps. In addition, we also had more stringent gap thresholds for the sister groups to the group of interests, to ensure that the characters we found indeed can differentiate the group of interest and its sister group. Below is the detailed procedure.

1. Define the group of interest (group I), its sister group (group S), and remaining group (group R, excluding the outgroups used for rooting the tree).
2. Define poor samples (7.5% of total samples) with more than 80% gaps in the alignment. Poor samples will not be considered in counting gaps for sequences outside the group of interest.
3. Define good positions as those that are not gaps in 80% of the samples (excluding poor samples).
4. Among good positions, extract the positions that are 100% conserved and have no gaps within group I, and definite these positions as P1 set.
5. Among the P1 set, remove those positions where the conserved characters for group of interest also appeared in the rest samples (group S and group R), resulting in P2 set.
6. Among the P2 set, only take the positions where the character in the rest (group S and group R) was conserved in more than 80% of the samples, and different from the character in the group I, resulting in P3 set.
7. Among the P3 set, filter out the positions where any species in the sister groups has a gap.

Sometimes these thresholds for gap fractions are too stringent, and minor adjustment was applied. For example, for Eudaminae group with 110 samples, we lowered the gap threshold for group I from 100% to 90% to allow missing data in a few samples. For Pericharini that contain many poor-quality samples, we lowered the gap fraction threshold in the rest to enable more positions. After extracting the candidate characters, human sequence experts manually verified those characters and picked the best characters with a preference for fewer gaps in the column and higher concentration of such positions in the same gene (to allow easy targeted amplification).

We also detected combined characters in COI barcodes to support phylogenetic groups. A human expert investigated the COI barcodes of all samples included in this project and proposed patterns for every phylogenetic group of interests. The proposed patterns were checked through all the barcodes we have (94,794 in total) to ensure the distinguishing power. This is an iterative process where a human expert would modify the distinguishing characters according to the barcodes detected in the automatic check.

## M6. Identification of genes and SNPs that correlate with morphological differences between mimicry complexes

### M6.1. Detection of genomic islands for speciation

Our analysis revealed that *Telegonus brevicauda* and *T. chalco* are sister species, despite the drastic difference in their morphology. Therefore, it is interesting to identify the “genomic islands for speciation” that potentially also drove the phenotypic divergence (16). Using eight *T. chalco* (sample IDs: 5724, 14111A07, 17097G01, 17097G02, 17097G03, 17097G04, 17097G05, and 17097G06) and six *T. brevicauda* (sample IDs: 17096A09, 17096A10, 17096A11, 17096A12, 17096B01, and 17096B02) specimens, we identified such genomic islands for speciation using two criteria that are similar in spirit to “Fst outlier tests” (17).

First, we estimated the fixation indices on sequences of whole proteins using the following formula:  $F_{st} = ((\pi_{\text{between}} - \pi_{\text{within}}) / \pi_{\text{between}})$ , where  $\pi_{\text{between}}$  is the average divergence in protein sequences for specimens of different species, and  $\pi_{\text{within}}$  is the average divergence in protein sequences for specimens of the same species. We required the genomic islands (proteins in our case) for speciation to have  $F_{st}$  above 0.8. Meanwhile, we excluded the highly variable proteins (such “variability” may be caused by contamination in the DNA library for old specimens) with high intra-species polymorphism by requiring  $\pi_{\text{within}}$  to be below 1%.

In the second procedure, we first detected amino acid positions with high  $F_{st}$  (namely, high  $F_{st}$  positions) by requiring the position the high-frequency (in above 75% of all samples) amino acids at that position to be different in the two species. We further identified proteins that are statistically enriched ( $P < 0.05$ ) in such high  $F_{st}$  positions using a binomial test ( $p$  = fraction of divergent positions in the alignment,  $m$  = the number of divergent positions in a protein,  $n$  = the total number of aligned positions in a protein).

In this procedure, we identified a total of 243 proteins (Table S4) that satisfy both criteria. We analyzed their functions using GO terms, and identified significantly enriched GO terms (Table S5) using a binomial test with the following parameters:

1. Number of success ( $M$ ) = number of GO terms associated with speciation hotspots
2. Number of trials ( $N$ ) = total number of speciation hotspots
3. Hypothesized probability of success ( $p$ ) = the fraction of proteins that are associated with this GO term in the entire set.

## M6.2. Detection of fixed mutations in mimicry complexes

*Telegonus chalco* is drastically different in morphology from its sister species, *T. brevicauda*, which is instead in the same mimicry complex as *Urbanus tucuti*. We hypothesized that some genomic features distinguishing *T. chalco* from *T. brevicauda* and *U. tucuti* may be related to the unique phenotypic feature of *T. chalco* characterized by extensive white areas on the hindwing, such as white tail, margins and fringes. We therefore identified the high-frequency derived alleles in *T. chalco*, using *T. brevicauda* and *U. tucuti* as control. We used a similar pipeline as that described in M5.3, and detected positions from sequence alignments of all the protein that satisfy the following criteria: (a) all *T. brevicauda* and *U. tucuti* specimens have the same amino acid, (b) all *T. chalco* samples have the same amino acid, and different from *T. brevicauda* and *U. tucuti*. We called these positions “diagnostic positions” of *T. chalco*.

These “diagnostic positions” of *T. chalco* may appear purely by chance due to the small sample size. To increase the likelihood of selecting positions that are relevant to the morphological traits of *T. chalco*, we used other species (test group) that share some common phenotypic features with *T. chalco* to filter these positions. We used the following species, *Cecropterus tehuacana* (sample ID: NVG-15609H02), *C. lyciades* (sample ID: NVG-3311), *C. doryssus* (sample ID: NVG-3610), *C. albociliatus* (sample ID: NVG-5749), and *C. casica* (sample ID: NVG-8269) in our test group: they all have extensive white scaling on hindwings, similar to *T. chalco*. From the “diagnostic positions”, we further selected those, in which the test group lacks amino acids present in *T. brevicauda-U. tucuti*, but instead has the same amino acid as *T. chalco* in at least 50% of the test group samples. We hypothesized that amino acids in these positions may be related to the white-scale phenotype observed in *T. chalco*, and analyzed distribution of these positions in proteins. Proteins with multiple ( $\geq 3$ ) such positions are show in Table S6.

## M7. References

1. Lindgreen S (2012) AdapterRemoval: Easy cleaning of next-generation sequencing reads. *BMC Res Notes*. doi:10.1186/1756-0500-5-337.
2. Cong Q, et al. (2016) Speciation in cloudless sulphurs gleaned from complete genomes. *Genome Biol Evol* 8(3). doi:10.1093/gbe/evw045.
3. Cong Q, Borek D, Otwinowski Z, Grishin NV (2015) Skipper genome sheds light on unique phenotypic traits and phylogeny. *BMC Genomics* 16(1). doi:10.1186/s12864-015-1846-0.
4. Shen J, Cong Q, Borek D, Otwinowski Z, Grishin NV (2017) Complete genome of achalarus lyciades, the first representative of the eudaminae subfamily of skippers. *Curr Genomics* 18(4). doi:10.2174/1389202918666170426113315.
5. Altschul SF, Gish W, Miller W, Myers EW, Lipman DJ (1990) Basic local alignment search tool. *J Mol Biol*. doi:10.1016/S0022-2836(05)80360-2.
6. Li H, Durbin R (2010) Fast and accurate long-read alignment with Burrows-Wheeler transform. *Bioinformatics*. doi:10.1093/bioinformatics/btp698.
7. Stoeckle M, Janzen D, Hallwachs W, Hanken J, Baker J (2003) *Taxonomy, DNA, and the Barcode of Life - Draft Conference Report*.

8. Ratnasingham S, Hebert PDN (2007) BOLD: The Barcode of Life Data System: Barcoding. *Mol Ecol Notes*. doi:10.1111/j.1471-8286.2007.01678.x.
9. Kajitani R, et al. (2014) Efficient de novo assembly of highly heterozygous genomes from whole-genome shotgun short reads. *Genome Res*. doi:10.1101/gr.170720.113.
10. Sahoo RK, et al. (2016) Ten genes and two topologies: an exploration of higher relationships in skipper butterflies (Hesperiidae). *PeerJ* 4:e2653.
11. Katoh K (2002) MAFFT: a novel method for rapid multiple sequence alignment based on fast Fourier transform. *Nucleic Acids Res*. doi:10.1093/nar/gkf436.
12. Stamatakis A (2014) RAxML version 8: A tool for phylogenetic analysis and post-analysis of large phylogenies. *Bioinformatics*. doi:10.1093/bioinformatics/btu033.
13. Mirarab S, et al. (2014) ASTRAL: genome-scale coalescent-based species tree estimation. *Bioinformatics* 30(17):i541--8.
14. Espeland M, et al. (2018) A Comprehensive and Dated Phylogenomic Analysis of Butterflies. *Curr Biol*. doi:10.1016/j.cub.2018.01.061.
15. Sahoo RK, Warren AD, Collins SC, Kodandaramaiah U (2017) Hostplant change and paleoclimatic events explain diversification shifts in skipper butterflies (Family: Hesperiidae). *BMC Evol Biol* 17(1):174.
16. Wolf JBW, Ellegren H (2017) Making sense of genomic islands of differentiation in light of speciation. *Nat Rev Genet*. doi:10.1038/nrg.2016.133.
17. Narum SR, Hess JE (2011) Comparison of FST outlier tests for SNP loci under selection. *Mol Ecol Resour*. doi:10.1111/j.1755-0998.2011.02987.x.

Table S1. Data for 250 sequenced Hesperidiæ specimens

| #  | DNA Voucher        | Taxon name                           | Ty/Sex | Locality                                                                       | Elevation  | GPS                  | Collectors                                          | Date                  | Collection | Genitalia No.           | Collection No.    |
|----|--------------------|--------------------------------------|--------|--------------------------------------------------------------------------------|------------|----------------------|-----------------------------------------------------|-----------------------|------------|-------------------------|-------------------|
| 1  | 1 NVG-5270         | <i>Burara striata</i>                | F      | China: Sichuan Prov., Pingwu Co., The Old Creek Nature Reserve                 |            |                      | Rongjiang Wang                                      | 11-Aug-2015           |            |                         |                   |
| 2  | 2 NVG-5271         | <i>Choaspes raffiniani</i>           | F      | China: Sichuan Prov., Pingwu Co., The Old Creek Nature Reserve                 |            |                      | Rongjiang Wang                                      | 12-Aug-2015           |            |                         |                   |
| 3  | 3 NVG-15103805     | <i>Euscemon banyasi rafflesia</i>    | A      | Australia: Queensland, Southbrook                                              |            |                      | maybe C. B. Davidson                                | probably around 1946  | USNM       |                         |                   |
| 4  | 4 NVG-5690         | <i>Utracomia aurus</i>               | F      | Costa Rica: Alajuela Prov., ACG, Sector Rincon Rain Forest, Camino Rio Francia | 410 m      | 10.90425, -85.28651  | José Pérez                                          | closed on 11-Jul-2003 | USNM       | NVG160214-51            | 03-SRNP-11250     |
| 5  | 5 NVG-5364         | <i>Utracomia kikawai</i>             | F      | Costa Rica: Guanacaste Prov., ACG, Sector Pitilla, Sendero Nacho               | 710 m      | 10.98445, -85.42481  | Chikito Moraga                                      | closed on 28-Apr-2014 | USNM       | NVG160214-50            | 14-SRNP-30480     |
| 6  | 6 NVG-5689         | <i>Utracomia orchus</i>              | F      | Costa Rica: Alajuela Prov., ACG, Sector San Cristobal, Rio Blanco Abajo        | 500 m      | 10.90037, -85.37254  | Carolina Cano                                       | closed on 31-May-2014 | USNM       | NVG160214-50            | 14-SRNP-2445      |
| 7  | 7 NVG-5731         | <i>Drepanothyrus kidanoi</i>         | M      | Guayana: Trop F Res, Middle Demerara R.                                        | 740 m      | 10.76307, -85.41332  | Mariano Pereira                                     | closed on 12-Apr-2013 | USNM       | NVG160214-92            | USNM ENT 00179099 |
| 8  | 8 NVG-5733         | <i>Aglaides crinitus</i>             | M      | Guayana: Trop F Res, Middle Demerara R.                                        | 200-400'   | 5.15533, -58.69957   | Steve Fratello                                      | closed on 28-Jul-2008 | USNM       | NVG160214-91            | 08-SRNP-35619     |
| 9  | 9 NVG-5730         | <i>Enteus sp. (burns01)</i>          | F      | Costa Rica: Guanacaste Prov., ACG, Sector Cacao, Sendero Derrumbe              | 1220 m     | 10.92918, -85.46426  | Winnie Hallwachs                                    | closed on 06-Sep-2013 | USNM       | NVG160214-93            | 13-SRNP-21784     |
| 10 | 10 NVG-5732        | <i>Phanus vitreus</i>                | F      | Costa Rica: Guanacaste Prov., ACG, Sector El Hacha, Estacion Los Alimentos     | 290 m      | 11.03226, -85.52776  | Lucia Rios                                          | closed on 25-Oct-2008 | USNM       | NVG160214-89            | 08-SRNP-5260      |
| 11 | 11 NVG-5728        | <i>Tarsoctonus corytus corba</i>     | M      | Costa Rica: Alajuela Prov., ACG, Sector San Cristobal, Finca San Gabriel       | 645 m      | 10.87766, -85.39343  | Elda Araya                                          | closed on 2-Oct-2008  | USNM       | NVG160214-89            | 08-SRNP-5260      |
| 12 | 12 NVG-5729        | <i>Phaenocarpa sp. okechobeae</i>    | M      | M Brazil: Rondonia, 8 km N Cauaialandia                                        | 190 m      | -10.50000, -62.86666 | David H. Ahrenholz                                  | 19-Dec-2015           | USNM       | NVG160214-97            | 13-SRNP-79622     |
| 13 | 13 NVG-5316        | <i>Pseudococcus pauliniae</i>        | M      | USA: FL, Monroe Co., Key West                                                  | 96 m       | 10.96187, -85.28045  | Nick V. Grishin                                     | closed on 31-Oct-2013 | USNM       | NVG160214-97            | 13-SRNP-79622     |
| 14 | 14 NVG-5738        | <i>Nassus phocus (burns02)</i>       | M      | Costa Rica: Guanacaste Prov., ACG, Sector Rincon Rain Forest, Palomo           | 420 m      | 10.74160, -85.42734  | Jose Cortez                                         | closed on 15-Oct-2007 | AMNH       | NVG160214-99            | 07-SRNP-60000     |
| 15 | 15 NVG-14101A03    | <i>Aurina dida</i>                   | M      | M French Guiana: St. Laurent                                                   |            |                      |                                                     |                       |            |                         |                   |
| 16 | 16 NVG-14063C10    | <i>Aurina azures</i>                 | M      | M Guyana: Cuyuni R., Kamaria Falls                                             | 100'       | 6.40000, -58.90000   | Steve Fratello et al.                               | 30-Nov-5-Dec-2000     | USNM       | X-6557 J. M. Burns 2007 | USNM ENT 00284339 |
| 17 | 17 NVG-14103F08    | <i>Emmelus purpurascens</i>          | M      | M Peru: San Martin, Huallaga, Saposoa                                          | 500 m      | 11.03226, -85.52776  | Lucia Rios                                          | May-1954              | USNM       | NVG160214-08            | 11-SRNP-20853     |
| 18 | 18 NVG-5747        | <i>Paraphrogaenes calathana</i>      | F      | Costa Rica: Alajuela Prov., ACG, Sector El Hacha, Estacion Los Alimentos       | 290 m      | 11.03226, -85.52776  | Duvalier Briceño                                    | closed on 23-Jul-2011 | USNM       | NVG160214-80            | 13-SRNP-65288     |
| 19 | 19 NVG-5749        | <i>Paraphrogaenes paterwagel</i>     | F      | Costa Rica: Alajuela Prov., ACG, Brasilia, Moga                                | 320 m      | 11.00766, -85.47936  | Manuel Pereira                                      | closed on 05-Oct-2002 | USNM       | NVG160217-01            | 02-SRNP-27687     |
| 20 | 20 NVG-5719        | <i>Nicephellus nicipharus</i>        | M      | Costa Rica: Guanacaste Prov., ACG, Sector Del Oro, Camino Mangos               | 480 m      | 10.98670, -85.38503  | Ricardo Calero                                      | closed on 15-Apr-2013 | USNM       | NVG160214-98            | 13-SRNP-70310     |
| 21 | 21 NVG-5740        | <i>Solmitis canalis</i>              | M      | Costa Rica: Guanacaste Prov., ACG, Sector Pitilla, Bullas                      | 440 m      | -3.65000, -52.33000  | P. Spangler & O. Flint                              | 2-9-Oct-1986          | USNM       | X-4312 J. M. Burns 1998 |                   |
| 22 | 22 NVG-5737        | <i>Solmitis canalis</i>              | M      | Costa Rica: Guanacaste Prov., ACG, Sector Pitilla, Bullas                      | 440 m      | -3.65000, -52.33000  | P. Spangler & O. Flint                              | 2-9-Oct-1986          | USNM       | X-4312 J. M. Burns 1998 |                   |
| 23 | 23 NVG-14063C05    | <i>Salmiota eriopis</i>              | M      | M Brazil: Mato Grosso, Diamantino, Alto Rio Arinos                             | 350-400 m  | -14.21666, -56.20000 | E. Furtado                                          | 7-Aug-1999            | USNM       | NVG160217-02            | 08-SRNP-65224     |
| 24 | 24 NVG-14063C03    | <i>Bungaiotis erythrus</i>           | M      | M Brazil: Mato Grosso, Diamantino, Alto Rio Arinos                             | 320 m      | -14.21666, -56.20000 | E. Furtado                                          | 7-Aug-1999            | USNM       | NVG160214-79            | 14-SRNP-3477      |
| 25 | 25 NVG-5741        | <i>Euriphellus viribates</i>         | M      | M Costa Rica: Alajuela Prov., ACG, Sector San Cristobal, Sendero Perdido       | 620 m      | 10.8794, -85.38607   | Oswaldo Espinoza                                    | closed on 23-Sep-2014 | USNM       | NVG160214-96            | 13-SRNP-76944     |
| 26 | 26 NVG-5718        | <i>Euriphellus viribates</i>         | M      | M Peru: Madre de Dios, Amazonia Lodge, Atalaya                                 | 491 m      | 10.93548, -85.25314  | Stephen Kinyon                                      | 24-Oct-2013           | USNM       | NVG160214-96            | 13-SRNP-76944     |
| 27 | 27 NVG-14063E01    | <i>Euriphellus viribates</i>         | M      | M Peru: Madre de Dios, Amazonia Lodge, Atalaya                                 | 491 m      | 10.93548, -85.25314  | Stephen Kinyon                                      | 24-Oct-2013           | USNM       | NVG160214-96            | 13-SRNP-76944     |
| 28 | 28 NVG-5735        | <i>Dysophellus porcius</i>           | M      | M Costa Rica: Alajuela Prov., ACG, Sector Rincon Rain Forest, Finca Esmeralda  | 123 m      | 11.01926, -85.40997  | Petrona Rios                                        | closed on 20-Mar-2003 | USNM       | NVG160213-05            | 05-SRNP-30577     |
| 29 | 29 NVG-15102D06    | <i>Phareus burnsi</i>                | M      | M Costa Rica: Guanacaste Prov., ACG, Sector Pitilla, Pasmompa                  | 440 m      | 11.01926, -85.40997  | Petrona Rios                                        | closed on 20-Mar-2003 | USNM       | X-856 J. M. Burns 1978  |                   |
| 30 | 30 NVG-15101A01    | <i>Cecropateris imita</i>            | F      | M Argentina: Salta, La Grande del Sul, Pelotas                                 | 1450 m     | 10.99697, -85.39666  | Donac Slezar                                        | 7-Dec-1985            | MGCL       |                         |                   |
| 31 | 31 NVG-15026C12    | <i>Cecropateris rancina</i>          | F      | M Argentina: Salta, La Grande del Sul, Pelotas                                 | 1450 m     | 10.99697, -85.39666  | Donac Slezar                                        | 7-Dec-1985            | MGCL       |                         |                   |
| 32 | 32 NVG-5077        | <i>Cecropateris zorex</i>            | F      | M Costa Rica: Guanacaste Prov., ACG, Sector Pitilla, Estacion Quica            | 200-450 m  | 3.61667, -53.71667   | Oscar J. Harvey                                     | closed on 03-Aug-2008 | USNM       | NVG151102-32            | 08-SRNP-70876     |
| 33 | 33 NVG-5695        | <i>Cecropateris longipennis</i>      | F      | M French Guiana: Saut                                                          | 470 m      | 3.61667, -53.71667   | Oscar J. Harvey                                     | closed on 03-Aug-2008 | USNM       | NVG151102-32            | 08-SRNP-70876     |
| 34 | 34 NVG-5072        | <i>Cecropateris lycoides</i>         | F      | Brazil: Minas Gerais, Serra do Cipó                                            | 1250 m     | -19.26666, -42.58333 | Robert K. Robbins & Becker                          | 19-Apr-1991           | USNM       | NVG151102-27            |                   |
| 35 | 35 NVG-3311        | <i>Cecropateris lycoides</i>         | F      | M USA: TX, Sabine Co., Sabine National Forest, Fox Hunters' Hill               |            | 31.18539, -93.72992  | Qian Cong & Nick V. Grishin                         | 12-Apr-2015           | USNM       |                         |                   |
| 36 | 36 NVG-8269        | <i>Cecropateris tehacana</i>         | F      | M Mexico: Coahuila, Cuesta La Murala                                           |            | 32.53728, -110.7197  | Qian Cong, Jing Zhang & Nick V. Grishin             | 26-Mar-2017           | USNM       |                         |                   |
| 37 | 37 11-80A-15609H02 | <i>Cecropateris confinis</i>         | F      | M USA: TX, Wise Co., IBI National Grassland                                    | 2400 m     | 33.36617, -97.58212  | Nick V. Grishin                                     | 12-Sep-1976           | USNM       | X-8409 J. M. Burns 1978 |                   |
| 38 | 38 NVG-4188        | <i>Cecropateris confinis</i>         | F      | M USA: TX, Sabine Co., Sabine National Forest, Fox Hunters' Hill               |            | 31.18539, -93.72992  | Qian Cong & Nick V. Grishin                         | 12-Apr-2015           | USNM       |                         |                   |
| 39 | 39 NVG-14061G02    | <i>Cecropateris pseudocellus</i>     | F      | M Mexico: Durango, El Madroño                                                  | 2400 m     | 34.41040, -95.91059  | Arthur M. Shapiro                                   | 1-Jul-1988            | USNM       |                         |                   |
| 40 | 40 NVG-4539        | <i>Cecropateris bathylus</i>         | F      | M USA: OK, Atoka Co., McGee Creek Natural Scenic Recreation Area               | 430 m      | 31.18539, -93.72992  | Qian Cong & Nick V. Grishin                         | 22-Aug-2015           | USNM       |                         |                   |
| 41 | 41 NVG-3313        | <i>Cecropateris pygmaea: pygmaea</i> | F      | M USA: TX, Sabine Co., Sabine National Forest, Fox Hunters' Hill               |            | 31.18539, -93.72992  | Qian Cong & Nick V. Grishin                         | 12-Apr-2015           | USNM       |                         |                   |
| 42 | 42 NVG-3075        | <i>Cecropateris pygmaea: pygmaea</i> | F      | M USA: TX, Sabine Co., Sabine National Forest, Fox Hunters' Hill               |            | 31.18539, -93.72992  | Qian Cong & Nick V. Grishin                         | 12-Apr-2015           | USNM       |                         |                   |
| 43 | 43 NVG-14104A05    | <i>Cecropateris pallipes</i>         | F      | M Costa Rica: Limon, Guapiles                                                  | 430 m      | 10.8962, -85.27769   | Jose Perez                                          | closed on 26-Mar-2013 | USNM       | NVG151102-30            | 13-SRNP-40562     |
| 44 | 44 NVG-5237        | <i>Cecropateris dorantes</i>         | F      | F USA: TX, Starr Co., Rio Grande City, Fort Ringgold                           |            | 10.21667, -83.78333  | Gordon B. Small                                     | 8-Jul-1980            | USNM       |                         |                   |
| 45 | 45 NVG-5749        | <i>Cecropateris albicollis</i>       | F      | M Costa Rica: Guanacaste Prov., ACG, Sector Rincon Rain Forest, Sendero Juntas | 430 m      | 10.8962, -85.27769   | Jose Perez                                          | closed on 26-Mar-2013 | USNM       | NVG151102-30            | 13-SRNP-40562     |
| 46 | 46 NVG-5749        | <i>Cecropateris albicollis</i>       | F      | M Costa Rica: Guanacaste Prov., ACG, Sector Rincon Rain Forest, Sendero Juntas | 430 m      | 10.8962, -85.27769   | Jose Perez                                          | closed on 26-Mar-2013 | USNM       | NVG151102-30            | 13-SRNP-40562     |
| 47 | 47 11-80A-13386B08 | <i>Cecropateris toxus</i>            | F      | F USA: TX, Starr Co., Roma, Citizens State Bank                                | 85 m       | 26.37038, -98.80675  | Nick V. Grishin                                     | 26-Nov-2015           | USNM       | NVG160217-10            | 07-SRNP-12984     |
| 48 | 48 NVG-15093A09    | <i>Cecropateris toxus</i>            | F      | M Panama: Canal Zone, Gamboa                                                   |            | 10.78938, -85.5098   | Guillermo Pereira                                   | closed on 08-Jun-2007 | USNM       | NVG160217-10            | 07-SRNP-12984     |
| 49 | 49 NVG-3610        | <i>Cecropateris dorsus</i>           | F      | M Brazil: Rondonia, 5 km S Cauaialandia, 67 km S Ariquemes, Inhea C-10         |            | 26.41479, -99.02241  | Qian Cong & Nick V. Grishin                         | 28-Jun-2015           | USNM       | NVG131102-74            |                   |
| 50 | 50 NVG-14103G09    | <i>Cecropateris phalaecus</i>        | F      | M USA: TX, Starr Co., Roma International Bridge                                |            | 9.11647, -79.68254   | Gordon B. Small                                     | 18-Jul-1993           | MGCL       |                         |                   |
| 51 | 51 NVG-3754        | <i>Spicauda praene</i>               | F      | M Mexico: San Luis Potosi, Xilitla                                             |            | 26.40516, -99.01921  | Qian Cong & Nick V. Grishin                         | 14-Jun-2015           | USNM       |                         |                   |
| 52 | 52 NVG-5691        | <i>Urbanus esmeraldus</i>            | F      | F USA: TX, Hidalgo Co., Old Rio Rico Rd. 1.5 air. mi SE of Relampago           | 96 m       | 26.06665, -97.88366  | Qian Cong & Nick V. Grishin                         | 24-Jun-1981           | USNM       |                         |                   |
| 53 | 53 NVG-15103F04    | <i>Urbanus evana</i>                 | F      | M Costa Rica: Alajuela Prov., ACG, Sector Rincon Rain Forest, Palomo           | 380 m      | 10.96187, -85.28045  | Keiner Aragon                                       | closed on 31-Aug-2013 | USNM       | NVG160214-52            | 13-SRNP-68996     |
| 54 | 54 NVG-5697        | <i>Urbanus velinus</i>               | F      | M Costa Rica: Guanacaste Prov., ACG, Sector Rincon Rain Forest, Palomo         | 380 m      | 10.79362, -85.45189  | Jose Cortez                                         | closed on 01-Aug-2007 | USNM       | NVG160214-52            | 13-SRNP-68996     |
| 55 | 55 NVG-4894        | <i>Urbanus proteus proteus</i>       | F      | M Guayana: Region 9, Kanuka Mts., Nappi Mt.                                    |            | 3.32500, -59.55833   | Steve Farrell, R. Hanner, S. Hendricks, S. Williams | 21-Feb-10-Mar-1999    | USNM       | NVG160214-58            | USNM ENT 232385   |
| 56 | 56 NVG-15103E08    | <i>Urbanus segnestami</i>            | F      | M USA: FL, Miami-Dade Co., Homestead, S of Keys Gate Golf Club                 | 400 m      | 25.44190, -80.43996  | Nick V. Grishin                                     | 4-Oct-2015            | USNM       |                         |                   |
| 57 | 57 NVG-14062H06    | <i>Urbanus megalotami</i>            | F      | M Mexico: Chiapas, Rio Sta. Domingo                                            | 450 m      | 10.90661, -85.28784  | Anabelle Cordoba                                    | closed on 14-Apr-2011 | USNM       | NVG160214-37            | 11-SRNP-41167     |
| 58 | 58 NVG-2932        | <i>Urbanus tucuti</i>                | F      | M Mexico: Chiapas, Rio Sta. Domingo                                            | 450 m      | 10.90661, -85.28784  | Anabelle Cordoba                                    | Sep-1948              | AMNH       |                         |                   |
| 59 | 59 NVG-17096A09    | <i>Telegonus brevicauda</i>          | F      | M Costa Rica: Alajuela Prov., ACG, Sector San Cristobal, Sendero Carmona       | 670 m      | 10.87621, -85.38632  | Elda Araya                                          | closed on 11-Apr-2007 | USNM       | NVG160214-85            | 07-SRNP-1174      |
| 60 | 60 NVG-5724        | <i>Telegonus brevicauda</i>          | F      | M Costa Rica: Alajuela Prov., ACG, Sector San Cristobal, Sendero Carmona       | 670 m      | 10.87621, -85.38632  | Elda Araya                                          | closed on 11-Apr-2007 | USNM       | NVG160214-85            | 07-SRNP-1174      |
| 61 | 61 NVG-15104C04    | <i>Telegonus catemacoensis</i>       | F      | M Mexico: Veracruz, Catemaco                                                   | 180 m      | -7.33333, -74.96666  | David H. Ahrenholz                                  | 19-Nov-2002           | USNM       |                         |                   |
| 62 | 62 NVG-5696        | <i>Telegonus naxos</i>               | F      | M Mexico: Veracruz, Catemaco                                                   | 180 m      | -7.33333, -74.96666  | David H. Ahrenholz                                  | 19-Nov-2002           | USNM       | NVG160214-85            | 07-SRNP-1174      |
| 63 | 63 NVG-5074        | <i>Telegonus talis</i>               | F      | M Costa Rica: Rio de Janeiro, Teresopolis P. N., Serra dos Orgaos              | 1100 m     | -22.45000, -43.00000 | Duarte                                              | Sep-1964              | AMNH       |                         |                   |
| 64 | 64 NVG-5078        | <i>Telegonus apastus</i>             | F      | M Costa Rica: Guanacaste Prov., ACG, Sector Del Oro, Puente Mena               | 280 m      | 11.04562, -85.45742  | Roster Moraga                                       | 6-Nov-1995            | USNM       | NVG151102-29            | 14-SRNP-20343     |
| 65 | 65 NVG-5076        | <i>Telegonus alector hopfferi</i>    | F      | M Costa Rica: Alajuela Prov., ACG, Sector Rincon Rain Forest, Palomo           | 96 m       | 10.96187, -85.28045  | Keiner Aragon                                       | closed on 09-Jan-2013 | USNM       | NVG151102-32            | 13-SRNP-68868     |
| 66 | 66 NVG-5716        | <i>Telegonus anaphus annetta</i>     | F      | M Costa Rica: Alajuela Prov., ACG, Brasilia, Gallinazo                         | 360 m      | 11.01825, -85.37199  | Duvalier Briceño                                    | closed on 20-Apr-2014 | USNM       | NVG151102-31            | 14-SRNP-65139     |
| 67 | 67 NVG-5676        | <i>Telegonus anaphus annetta</i>     | F      | M Costa Rica: Alajuela Prov., ACG, Sector Rincon Rain Forest, Guanacaste       | 660 m      | 10.77824, -85.39458  | Keiner Aragon                                       | closed on 03-Feb-2010 | USNM       | NVG160214-77            | 10-SRNP-67040     |
| 68 | 68 NVG-5698        | <i>Telegonus hystor</i>              | F      | F Mexico: Guerrero, 13 km NW Iguala                                            | 1220 m     |                      | Keiner Aragon                                       | 12-Sep-1982           | USNM       | NVG160214-37            |                   |
| 69 | 69 NVG-15111F10    | <i>Autachton reflexus</i>            | F      | M USA: AZ, Cochise Co., Huachuca Mts., Miller Canyon                           | 5800-6200' |                      | A. S. & N. D. Menke                                 | 11-Jul-2000           | USNM       | NVG160214-59            |                   |
| 70 | 70 NVG-5694        | <i>Autachton rhyllus</i>             | F      | F Brazil: Santa Catarina, Joinville                                            |            |                      |                                                     | 18-Aug-1940           | AMNH       |                         |                   |
| 71 | 71 NVG-5748        | <i>Autachton bipunctatus</i>         | M      | M Peru: Cuzco, Quitacalzon, Cosnipata Road                                     |            |                      | Stephen Kinyon                                      | 12-May-2012           | USNM       | NVG160214-55            |                   |
| 72 | 72 NVG-5715        | <i>Autachton patillo patillo</i>     | M      | M Peru: Madre de Dios Region, Amazonia Lodge                                   | 733 m      | 10.77079, -85.37432  | Mariano Pereira                                     | 16-May-2012           | USNM       | NVG160214-55            |                   |
| 73 | 73 NVG-5693        | <i>Autachton oryx</i>                | M      | M Costa Rica: Guanacaste Prov., ACG, Sector Mundo Nuevo, Camino Pozo Tres      | 800-950 m  | 0.02222, -77.32277   | Jason P. Hall & M. Alma Solis                       | closed on 29-Aug-2009 | USNM       | NVG160214-76            | 09-SRNP-57000     |
| 74 | 74 NVG-3835        | <i>Spatholepia clonus</i>            | M      | M Ecuador: Sucumbios, Cerro Limbuaqui Norte                                    | 109 m      | 26.40521, -99.01941  | Qian Cong & Nick V. Grishin                         | 18-22-Aug-2002        | USNM       |                         |                   |



|     |              |                                             |                                                                                       |           |                      |                                                      |      |                         |                   |
|-----|--------------|---------------------------------------------|---------------------------------------------------------------------------------------|-----------|----------------------|------------------------------------------------------|------|-------------------------|-------------------|
| 86  | NVG-5720     | <i>Zetetes zeutus</i>                       | Costa Rica: Guanacaste Prov., ACG, Sector Del Oro, Quebrada Trigal                    | 290 m     | 11.02681, -85.49547  | Lucía Ríos                                           | USNM | NVG160214-81            | 07-SRNP-21845     |
| 87  | NVG-3288     | <i>Laboda lilliana lilliana</i>             | China: Yunnan, Mengjia Co.                                                            | 3000 m    |                      |                                                      |      |                         |                   |
| 88  | NVG-3325     | <i>Laboda nepos</i>                         | M Tibet: Chamdo Prov., Paksho                                                         | 700 m     |                      |                                                      |      |                         |                   |
| 89  | NVG-15105805 | <i>Labrotractus valeriana</i>               | M USA: AZ, Santa Cruz Co., Harschaw Cr. Rd., 6.5 mi from Patagonia                    | 6500'     |                      |                                                      | CAS  |                         |                   |
| 90  | NVG-14107801 | <i>Labrotractus cydalis</i>                 | M Mexico: Chiapas, 60 km SW Comitán, Las Delicias                                     | 722 m     |                      |                                                      | AMNH |                         |                   |
| 91  | NVG-15099C02 | <i>Codactractus cydalis</i>                 | M Mexico: Oaxaca, El Vedado - San Sebastián                                           | 295 m     | 10.86546, -85.39694  | Elida Arroyo                                         | USNM | NVG160214-39            | 12-SRNP-1823      |
| 92  | NVG-17098D11 | <i>Codactractus imaiena</i>                 | M Costa Rica: Alajuela Prov., ACG, Sector San Cristóbal, Jardín Estrada               | 500'      | 10.83764, -85.61871  | Daniel H. Janzen                                     | USNM | NVG160214-41            | 11-SRNP-12727     |
| 93  | NVG-5680     | <i>Codactractus atcaeus</i>                 | M USA: AZ, Coconino Co., Oak Creek Canyon                                             | 290 m     | 11.03226, -85.52776  | Lucía Ríos                                           | USNM | NVG160214-43            | 14-SRNP-20297     |
| 94  | NVG-5682     | <i>Ridens mephitis</i>                      | Costa Rica: Guanacaste Prov., ACG, Sector Los Almendros                               | 1220 m    | 10.92918, -85.46426  | Manuel Pereira                                       | USNM | NVG160214-44            | 13-SRNP-35317     |
| 95  | NVG-5684     | <i>Venada nevada</i>                        | Costa Rica: Guanacaste Prov., ACG, Sector Cacao, Sendero Derrumbe                     | 460 m     | 10.9887, -85.38503   | Ricardo Calero                                       | USNM | NVG160214-45            | 14-SRNP-70854     |
| 96  | NVG-5684     | <i>Cephalis aelleis</i>                     | Costa Rica: Guanacaste Prov., ACG, Sector Pitilla, Bullas                             | 160 m     | 10.95991, -85.28298  | Keiner Aragón                                        | USNM | NVG160214-46            | 13-SRNP-79769     |
| 97  | NVG-5734     | <i>Ectomis aelleis</i>                      | Costa Rica: Alajuela Prov., ACG, Sector Rincon Rain Forest, Estación Botarrama        | 420 m     | 10.96187, -85.28045  | Duvalier Britocho                                    | USNM | NVG160214-44            | 14-SRNP-46003     |
| 98  | NVG-5683     | <i>Ectomis kanshu</i>                       | Costa Rica: Alajuela Prov., ACG, Sector Rincon Rain Forest, Palomo                    | 96 m      | 10.74160, -85.42734  | Jose Cortez                                          | USNM | NVG160214-53            | 13-SRNP-56170     |
| 99  | NVG-5692     | <i>Ectomis octomaculata</i>                 | M Costa Rica: Guanacaste Prov., ACG, Sector Mundo Nuevo, Punta Plancha                | 491 m     |                      | Stephen T. Austin                                    | MGCL |                         |                   |
| 100 | NVG-15025E05 | <i>Ectomis labriaris</i>                    | M Brazil: Rondônia, 62 km S Ariquesmes, linha C-20, 7 km E B65, Fazenda Rancho Grande | 96 m      | 10.96187, -85.28045  | Keiner Aragón                                        | USNM | NVG160214-83            | 10-SRNP-67881     |
| 101 | NVG-5722     | <i>Ectomis perniciosus</i>                  | M Peru: Atalaya, Amazonia Lodge                                                       | 200-400'  | 5.15534, -58.69967   | Steve Fratello et al.                                | MGCL |                         |                   |
| 102 | NVG-5746     | <i>Ectomis peruviana</i>                    | M Guyana: Trop F Res, Middle Demerara R.                                              | 255 m     | 11.03028, -85.54781  | Elieth Cantillano                                    | USNM | NVG160214-87            | 11-SRNP-20768     |
| 103 | NVG-5685     | <i>Ectomis cythna</i>                       | M Costa Rica: Guanacaste Prov., ACG, Sector El Hacha, Quebrada Leona                  | 1400'     | -26.33000, -49.29000 | Ron Leuschner                                        | USNM |                         |                   |
| 104 | NVG-15025D10 | <i>Ectomis fides</i>                        | M USA: FL, Monroe Co., Key West                                                       | sea level |                      |                                                      | USNM |                         |                   |
| 105 | NVG-5726     | <i>Telamides reus</i>                       | M Brazil: Santa Catarina, Rio Natal nr. R. Vermelho                                   | 1100 m    | -22.45000, -45.00000 | Martins                                              | USNM |                         |                   |
| 106 | NVG-5338     | <i>Polygonia leo</i>                        | M Mexico: Oaxaca, Zipolite, El Arroyo                                                 | 140 m     | 0.83333, -66.16666   | P. J. & P. M. Spangler, R.A. Faubure & W. E. Steiner | USNM |                         |                   |
| 107 | NVG-5033     | <i>Polygonia savignyi</i>                   | M Brazil: Espírito Santo, 25 km, N. Linares, BR101 - km 158                           | 140 m     | 26.07093, -97.89131  | Qian Cong & Nick V. Grishin                          | USNM |                         |                   |
| 108 | NVG-5727     | <i>Oliedides vulpinus</i>                   | M Brazil: Rio de Janeiro, Teresopolis no. N. Serra dos Orgãos                         | 950 m     | 0.02833, -77.32033   | Jason P. W. Hall & M. Alma Solis                     | USNM | NVG160214-49            | USNMMENT 01321883 |
| 109 | NVG-5699     | <i>Oncinthus ampers rufus</i>               | F Venezuela: Amazonas, Cerro de la Neblina Basecamp                                   | 974'      | 22.32167, 94.48667   | Stephen Kinyon                                       | USNM | NVG161105-04            | USNMMENT 01321969 |
| 110 | NVG-17094F05 | <i>Nerula flabrena</i>                      | M Ecuador: Pastaza, 8 km S Shell                                                      |           |                      |                                                      |      |                         |                   |
| 111 | NVG-14063B05 | <i>Oncinthus ampers rufus</i>               | M Ecuador: Sucumbios, Cerro Lumbaqui Norte                                            |           |                      |                                                      |      |                         |                   |
| 112 | NVG-3354     | <i>Cogilia calchasa</i>                     | M Myanmar: Chin State, Alaungdaw Khattapa Nat. Park                                   |           |                      |                                                      |      |                         |                   |
| 113 | NVG-5688     | <i>Marela tamba</i>                         | M Myanmar: Mandalay Div., Alaungdaw Khattapa Nat. Park                                |           |                      |                                                      |      |                         |                   |
| 114 | NVG-7993     | <i>Caelenorrhinus syllius</i>               | M Australia: Queensland, Killarney                                                    |           |                      |                                                      |      |                         |                   |
| 115 | NVG-7331     | <i>Pseudocaladenia dan fobia</i>            | M Myanmar: Rakhine Div., Gwa Twsp Ye Phya, Chaung                                     |           |                      |                                                      |      |                         |                   |
| 116 | NVG-7331     | <i>Pseudocaladenia dan fobia</i>            | M Myanmar: S. Shan State, Kalaw Reservoir                                             |           |                      |                                                      |      |                         |                   |
| 117 | NVG-7345     | <i>Saranganya dasahara</i>                  | M Myanmar: S. Shan State, Kalaw Reservoir                                             |           |                      |                                                      |      |                         |                   |
| 118 | NVG-16106A03 | <i>Necrocoryne repanda</i>                  | M Costa Rica: Alajuela Prov., ACG, Sector San Cristóbal, Sendero Carmona              | 4400'     | 20.60335, 96.52999   | Stephen Kinyon                                       | USNM | NVG170206-49            | USNMMENT 01321704 |
| 119 | NVG-7864     | <i>Capilla bhagava</i>                      | M Myanmar: Rakhine Div., Gwa Twsp Kan Tha Yar                                         | 670 m     | 10.87621, -85.38632  | Caroline Cano                                        | USNM | NVG161105-14            |                   |
| 120 | NVG-7336     | <i>Gerasis bhagava</i>                      | M Myanmar: S. Shan State, Kalaw Reservoir                                             |           |                      |                                                      |      |                         |                   |
| 121 | NVG-7341     | <i>Odontaspis angulata</i>                  | F Costa Rica: Alajuela Prov., ACG, Sector San Cristóbal, Sendero Carmona              | 1020 m    |                      |                                                      |      |                         |                   |
| 122 | NVG-7333     | <i>Tadantides litigiosus</i>                | M Panama: Canal Zone, Madden Forest Preserve                                          | 1194 m    |                      |                                                      |      |                         |                   |
| 123 | NVG-17094H03 | <i>Passova gellias</i>                      | M Costa Rica: Alajuela Prov., ACG, Sector Rincon Rain Forest, Palomo                  | 3150 m    |                      |                                                      |      |                         |                   |
| 124 | NVG-17094E03 | <i>Zonitonia panamensis</i>                 | M Mexico: Hidalgo, Puerto del Caballo                                                 | 1194 m    |                      |                                                      |      |                         |                   |
| 125 | NVG-14113A02 | <i>Zonitonia panamensis</i>                 | M Mexico: Hidalgo, Puerto del Caballo                                                 |           |                      |                                                      |      |                         |                   |
| 126 | NVG-17094C09 | <i>Pyrrhopyge hadassa</i>                   | M Peru: Cuzco, Cosnipata Valley, Quebrada Santa Isabel                                |           |                      |                                                      |      |                         |                   |
| 127 | NVG-17094D10 | <i>Metaradix cossinga cedra</i>             | M Peru: Cuzco, Paucartambo/Aclicanac Rd., Quebrada, Chusa, km 88                      |           |                      |                                                      |      |                         |                   |
| 128 | NVG-17094F01 | <i>Metaradix cossinga cedra</i>             | M Peru: Cuzco, Cosnipata Valley, Quebrada Santa Isabel                                |           |                      |                                                      |      |                         |                   |
| 129 | NVG-14107C02 | <i>Criaticus pierdia aurata</i>             | M Ecuador: Tungurahua, Rio Topo                                                       | 1500 m    |                      |                                                      |      |                         |                   |
| 130 | NVG-7891     | <i>Aethalia loachewa</i>                    | Costa Rica: Guanacaste Prov., ACG, Sector El Hacha, Estación Los Almendros            | 290 m     | 11.03226, -85.52776  | Lucía Ríos                                           | USNM | NVG170206-76            | 13-SRNP-22231     |
| 131 | NVG-16108E06 | <i>Tosta tosta</i>                          | M Peru: Amazonas, W Bara Wawajin                                                      | 750 m     | 27.60000, -78.40000  | Robert K. Robbins & Gerardo Lamas                    | USNM | NVG170206-82            | 10-SRNP-67957     |
| 132 | NVG-3758     | <i>Aethydes pallida</i>                     | F USA: TX, Hidalgo Co., Old Rio Rio Rd. 1.5 air mi SE of Relampago                    | 500 m     | 26.06665, -97.88366  | Qian Cong & Nick V. Grishin                          | USNM | X-6721 J.M. Burns 2009  |                   |
| 133 | NVG-1931     | <i>Aethydes pallida</i>                     | M Mexico: Tamaulipas, Villa Gomezarias                                                | 500 m     |                      |                                                      |      |                         |                   |
| 134 | NVG-7878     | <i>Moriva fissimacula</i>                   | Costa Rica: Guanacaste Prov., ACG, Sector Del Oro, Monte Cristo                       | 320 m     | 11.01373, -85.42531  | Elieth Cantillano                                    | TAMU | NVG140104-70            | 10-SRNP-21347     |
| 135 | NVG-7880     | <i>Grais fissimacula</i>                    | Costa Rica: Guanacaste Prov., ACG, Sector Pitilla, Amónias                            | 390 m     | 11.04249, -85.40339  | Manuel Cristo                                        | USNM | NVG170206-65            | 14-SRNP-30242     |
| 136 | NVG-7893     | <i>Doberies anticus</i>                     | Costa Rica: Guanacaste Prov., ACG, Sector Cacao, Sendero Circular                     | 1185 m    | 10.92714, -85.46683  | Harry Ramirez                                        | USNM | NVG170206-78            | 03-SRNP-23600     |
| 137 | NVG-7900     | <i>Sobanoides abbreviata</i>                | Costa Rica: Guanacaste Prov., ACG, Sector Pitilla, Estación Quica                     | 470 m     | 10.99697, -85.39666  | Ricardo Calero                                       | USNM | NVG170206-85            | 09-SRNP-72126     |
| 138 | NVG-14112H01 | <i>Myrtila cf. binoculus</i>                | M Ecuador: Napo, Yasuni National Park                                                 | 1600 m    |                      |                                                      |      |                         |                   |
| 139 | NVG-14107D03 | <i>Myrtila cf. binoculus</i>                | M Ecuador: Pichincha Prov., Masquipucuna, nr. Napegalito                              | 96 m      | 10.96187, -85.28045  | Minor Camacho                                        | USNM | X-6055 J. M. Burns 2004 |                   |
| 140 | NVG-7897     | <i>Eracon sarahburseae</i>                  | Costa Rica: Alajuela Prov., ACG, Sector Rincon Rain Forest, Palomo                    | 750 m     | 0.21667, -77.48833   | Jason P. W. Hall & I. Aldas                          | USNM | NVG160214-82            | 10-SRNP-67957     |
| 141 | NVG-5721     | <i>Cabirus prophas</i>                      | M Ecuador: Sucumbios, ridge N of Puerto Libre, km 35 Lumbacqui-La Bonita rd.          | 305 m     | 10.77175, -85.43400  | Guillermo Pereira                                    | ZMHG | X-4409 J. M. Burns 1998 |                   |
| 142 | NVG-17095D03 | <i>Pseudodrepanis atinas</i>                | Costa Rica: Guanacaste Prov., ACG, Sector Mundo Nuevo, Vado Miramonte                 | 527 m     | 10.9305, -85.37223   | Elda Araya                                           | USNM | NVG170206-79            | 11-SRNP-57460     |
| 143 | NVG-7894     | <i>Ouleta salvina</i>                       | Costa Rica: Guanacaste Prov., ACG, Sector San Cristóbal, Sendero Huerta               | 550 m     | 10.76480, -85.38445  | Jose Cortez                                          | USNM | NVG170206-80            | 13-SRNP-11186     |
| 144 | NVG-7902     | <i>Quadrus certialis</i>                    | Costa Rica: Guanacaste Prov., ACG, Quebrada Grande, Casa Consuelo Dunia               | 460 m     | 10.9163, -85.37869   | Anabelle Cordoba                                     | USNM | NVG170206-86            | 08-SRNP-57426     |
| 145 | NVG-7895     | <i>Zera sp. (BurnsIDHJ02)</i>               | Costa Rica: Guanacaste Prov., ACG, Sector Mundo Nuevo, Vado Zanja Tapada              | 450 m     | -1.06666, -77.60000  | David H. Ahrenholz                                   | USNM | NVG170206-81            | 06-SRNP-7674      |
| 146 | NVG-7901     | <i>Gnandens brontinus</i>                   | M Ecuador: Napo Prov., Jatun Sacha Biological Station                                 | 470 m     | 10.77222, -85.41225  | Giesdeler Campos                                     | USNM | NVG170206-88            | 07-SRNP-59529     |
| 147 | NVG-7896     | <i>Pythionides anguillaris</i>              | Panama: Darien Prov., Cana                                                            | 500 m     |                      |                                                      |      |                         |                   |
| 148 | NVG-7979     | <i>Haemactis sanguinilis</i>                | Panama: Darien Prov., Cana                                                            | 400 m     | 10.90661, -85.28784  | Jose Perez                                           | USNM | NVG170207-62            | USNMMENT 01321817 |
| 149 | NVG-7903     | <i>Ataraxia sallei</i>                      | F Peru: Cuzco, Cosnipata Road, Paradise Lodge                                         | 1450 m    |                      |                                                      |      |                         |                   |
| 150 | NVG-7977     | <i>Eburuncus unifasciata</i>                | Costa Rica: Alajuela Prov., ACG, Sector Rincon Rain Forest, Sendero Juntas            | 160-350 m | -10.53333, -62.80000 | John Macdonald                                       | USNM | NVG170207-56            | USNMMENT 01321821 |
| 151 | NVG-7904     | <i>Milvionia lucaria</i>                    | Brazil: Rondônia, vic. Caucaliandia                                                   | 400 m     | 10.89666, -85.20000  | Jorge Hernandez                                      | USNM | NVG170206-64            | 12-SRNP-42810     |
| 152 | NVG-7981     | <i>Paralomis stigma</i>                     | Costa Rica: Alajuela Prov., ACG, Sector Rincon Rain Forest, Rio Francia Arriba        | 1220 m    | 10.92918, -85.46426  | Manuel Pereira                                       | USNM | NVG170206-73            | 11-SRNP-35371     |
| 153 | NVG-7980     | <i>Paralomis stigma</i>                     | Costa Rica: Guanacaste Prov., ACG, Sector Cacao, Sendero Derrumbe                     |           |                      |                                                      |      |                         |                   |
| 154 | NVG-7879     | <i>Paralomis anastomias</i>                 | M Argentina                                                                           |           |                      |                                                      |      |                         |                   |
| 155 | NVG-7888     | <i>Tiana niger</i>                          | M USA: TX, Hidalgo Co., Mission, 10th street at irrigation ditch                      | 1500 m    |                      |                                                      |      |                         |                   |
| 156 | NVG-14102A01 | <i>Campylabus problematica</i>              | M Colombia: Cauca, R. San Joaquin                                                     | 540 m     | 10.86472, -85.41531  | Elda Araya                                           | AMNH | NVG170206-60            | 12-SRNP-4870      |
| 157 | NVG-5485     | <i>Arearathia tractipennis tractipennis</i> | Costa Rica: Alajuela Prov., ACG, Sector San Cristóbal, Tajo Angéles                   | 96 m      | 10.96187, -85.28045  | Keiner Aragón                                        | USNM | NVG170206-62            | 13-SRNP-67590     |
| 158 | NVG-14101B01 | <i>Austinus heretica</i>                    | M Brazil: Mato Grosso, Diamantino, Alfo Rio Arinos                                    | 350-400 m | -14.21664, -56.20000 | E. Furtado                                           | USNM | NVG170207-58            | USNMMENT 01321813 |
| 159 | NVG-7875     | <i>Polyctor polyctor</i>                    | M Peru: Cuzco, Cosnipata Road, Mirador                                                | 1700 m    |                      |                                                      |      |                         |                   |
| 160 | NVG-7977     | <i>Viola violacea</i>                       | F Greece: Epirus                                                                      |           |                      |                                                      |      |                         |                   |
| 161 | NVG-7974     | <i>Viola violacea</i>                       | M Greece: Olympia                                                                     |           |                      |                                                      |      |                         |                   |
| 162 | NVG-7770     | <i>Noctuana haematospila</i>                | M Peru: Cuzco, Cosnipata Road, Pilcopata                                              | 564 m     |                      |                                                      |      |                         |                   |
| 163 | NVG-7770     | <i>Spialia orbifer</i>                      | M Panama: Darien Prov., Cana                                                          | 750 m     |                      |                                                      |      |                         |                   |
| 164 | NVG-7763     | <i>Carcardus atcaeus</i>                    | USA: NM, Colfax Co., Cimarron                                                         | 6430'     |                      |                                                      |      |                         |                   |
| 165 | NVG-7975     | <i>Gorgopis trochilus</i>                   | M Panama: Darien Prov., Cana                                                          |           |                      |                                                      |      |                         |                   |
| 166 | NVG-7246     | <i>Bolla breunus</i>                        | F USA: TX, Delta Co., 5 air mi WNW of Commerce, CR1531 @ Middle Sulphur River         |           |                      |                                                      |      |                         |                   |
| 167 | NVG-7976     | <i>Pholisora mejanica</i>                   | F USA: TX, Cameron Co., E of Brownsville, Boca Chica                                  |           |                      |                                                      |      |                         |                   |
| 168 | NVG-7039     | <i>Staphylus hayhursti</i>                  | F USA: TX, Cameron Co., E of Brownsville, Boca Chica                                  |           |                      |                                                      |      |                         |                   |
| 169 | NVG-5594     | <i>Heperopsis aliphystis texana</i>         | M Costa Rica: Guanacaste Prov., ACG, Sector Santa Rosa, Cafetal                       | 280 m     | 10.85827, -85.61089  | Ruth Franco                                          | USNM | NVG170206-94            | 04-SRNP-15751     |
| 170 | NVG-7909     | <i>Anisochoria polyactis</i>                | M Costa Rica: Guanacaste Prov., ACG, Sector Santa Rosa, Cafetal                       |           |                      |                                                      |      |                         |                   |
| 171 | NVG-6998     | <i>Zopryllon sandace</i>                    | M Mexico: Oaxaca, 2.2 mi NW Matatlan                                                  |           |                      |                                                      |      |                         |                   |

|     |                 |                                             |                                                                                                |           |                      |                                         |      |               |                 |                          |
|-----|-----------------|---------------------------------------------|------------------------------------------------------------------------------------------------|-----------|----------------------|-----------------------------------------|------|---------------|-----------------|--------------------------|
| 172 | NVG-7908        | <i>Timodreus satyrus</i>                    | Costa Rica: Guanacaste Prov., ACG, Sector Mundo Nuevo, Punta Plancha                           | 420 m     | 10.74160, -85.42734  | Jose Alberto Sanchez                    | USNM | NVG170206-93  | 07-SRNP-58884   | closed on 13-Sep-2007    |
| 173 | NVG-7899        | <i>Pachys lewis</i>                         | M Costa Rica: Guanacaste Prov., ACG, Sector Del Oro, Quebrada Raiz                             | 280 m     | 11.02865, -85.48669  | Freddy Quesada                          | USNM | NVG170207-67  | 03-SRNP-30995   | closed on 05-Dec-2007    |
| 174 | NVG-7982        | <i>Plumbago plumbeo</i>                     | Brazil: Rondonia, 8 km N Cacaulandia                                                           | 325 m     | -10.50000, -62.86666 | David H. Ahrenholz                      | USNM | NVG170207-67  | USNMNT 01321822 | closed on 18-Oct-1989    |
| 175 | NVG-7907        | <i>Antigonon erubescens</i>                 | Costa Rica: Guanacaste Prov., ACG, Sector Mundo Nuevo, Estacion La Perla                       | 325 m     | 10.76377, -85.43313  | Jose Cortez                             | USNM | NVG170206-92  | 13-SRNP-56479   | closed on 18-Oct-2013    |
| 176 | NVG-7906        | <i>Xenophanes trypanus</i>                  | M Costa Rica: Alajuela Prov., ACG, Sector San Cristobal, Estacion San Gerardo                  | 575 m     | 10.88000, -85.38887  | J. D. Turner & N. Turner                | USNM | NVG170206-90  | 14-SRNP-103428  | closed on 10-Apr-2014    |
| 177 | NVG-7905        | <i>Carnegiea stenocens</i>                  | Costa Rica: Alajuela Prov., ACG, Sector San Cristobal, Finca San Gabriel                       | 645 m     | 10.87766, -85.39243  | Carolina Cano                           | USNM | NVG170207-68  | USNMNT 01321823 | closed on 19-Nov-1993    |
| 178 | NVG-7985        | <i>Trina geonetrina</i>                     | French Guiana: Saül                                                                            | 200-450 m | 3.61666, -53.71666   | Don J. Harvey                           | USNM | NVG170207-68  | USNMNT 01321823 | closed on 14-15-Jun-1992 |
| 180 | PAO-187         | <i>Pyrus miltavae</i>                       | M Greece: Macedonia, Mt. Vourinos                                                              | 4000'     |                      |                                         | USNM | NVG170205-56  | USNMNT 01321611 |                          |
| 181 | NVG-14102F02    | <i>Chirius libanota</i>                     | USA: UT, Garfield Co., Grand Staircase - Escalante National Monument, Spencer Flat Rd.         |           |                      |                                         | USNM | NVG170107-40  |                 |                          |
| 182 | NVG-7554        | <i>Burnsius albata</i>                      | Chile: Antofagasta, Leber                                                                      |           |                      | Paul A. Opler and Evi Buckner-Opler     | USNM | NVG170107-40  |                 |                          |
| 183 | NVG-3375        | <i>Burnsius albata</i>                      | F USA: TX, Bexar Co., San Antonio, 5598 Mt McKinley Dr., Ebony Hill Research Station           |           |                      | Roy O. Kendall & C. A. Kendall          | TAMU | NVG170107-40  |                 |                          |
| 184 | NVG-14114E04    | <i>Helopetes sublinea</i>                   | M USA: TX, Starr Co., 0.5 mi W Roma Creek, along FM650                                         |           |                      | Qian Cong & Nick V. Grishin             | USNM | NVG170206-66  |                 |                          |
| 185 | 11-80A-13385C12 | <i>Helopetes sublinea</i>                   | M USA: TX, Hidalgo Co., Alamo                                                                  |           |                      | Charles Bordenlon                       | USNM | NVG170206-66  |                 |                          |
| 186 | NVG-7898        | <i>Helopetes erictorum</i>                  | M USA: AZ, Gila Co., Washington Park, Colonel Devin Trail                                      | 280 m     | 34.43746, -111.25656 | Qian Cong & Nick V. Grishin             | USNM | NVG170206-83  | 13-SRNP-21146   |                          |
| 187 | NVG-7881        | <i>Cfito sp. (Burns02)</i>                  | Costa Rica: Guanacaste Prov., ACG, Sector El Hacha, Vuelta Peligrosa                           | 1150 m    | 11.03534, -85.53645  | Roster Moraga                           | USNM | NVG170206-66  | 09-SRNP-36601   |                          |
| 188 | NVG-7247        | <i>Mylon lassia</i>                         | M Costa Rica: Guanacaste Prov., ACG, Sector Cacao, Estacion Cacao                              | 675 m     | 10.92691, -85.46822  | Manuel Pereira                          | USNM | NVG161005-74  |                 |                          |
| 189 | NVG-5090        | <i>Potamonaxas melicertes</i>               | M Costa Rica: Guanacaste Prov., ACG, Sector Pitilla, Estacion Pitilla                          | 310 m     | 10.98931, -85.42581  | Freddy Quesada                          | USNM | NVG151101-98  | 13-SRNP-31335   |                          |
| 190 | NVG-7884        | <i>Anostranus semipiternus</i>              | Costa Rica: Guanacaste Prov., ACG, Sector Santa Elena, Quebrada Clusia                         | 310 m     | 10.87741, -85.66120  | Johan Vargas                            | USNM | NVG170206-69  | 07-SRNP-12147   |                          |
| 191 | NVG-7886        | <i>Helias cama</i>                          | Costa Rica: Alajuela Prov., ACG, Sector Rincon Rain Forest, Camino Albergue Oscar              | 560 m     | 10.87411, -85.32363  | Oswaldo Espinoza                        | USNM | NVG170206-71  | 08-SRNP-25660   |                          |
| 192 | NVG-7889        | <i>Cuculiphalia thrasibulus</i>             | Costa Rica: Guanacaste Prov., ACG, Sector Mundo Nuevo, Camino Pozo Tres                        | 733 m     | 10.77079, -85.37422  | Jose Cortez                             | USNM | NVG170206-74  | 12-SRNP-56445   |                          |
| 193 | NVG-7885        | <i>Ehrharta marconon</i>                    | Costa Rica: Guanacaste Prov., ACG, Sector Del Oro, Quebrada Suamposa                           | 290 m     | 11.02364, -85.49139  | Elieth Cantillano                       | USNM | NVG170206-70  | 06-SRNP-23020   |                          |
| 194 | NVG-7883        | <i>Timochares trifasciata</i>               | Costa Rica: Guanacaste Prov., ACG, Sector Santa Elena, Vado Descanso                           | 400 m     | 10.86336, -85.72535  | Guillermo Pereira                       | USNM | NVG170206-68  | 05-SRNP-12097   |                          |
| 195 | NVG-7887        | <i>Camptopleria auxo</i>                    | Costa Rica: Alajuela Prov., ACG, Sector Rincon Rain Forest, Camino Rio Francia                 | 710 m     | 10.90425, -85.28851  | Jose Perez                              | USNM | NVG170206-72  | 12-SRNP-43606   |                          |
| 196 | NVG-5100        | <i>Chlorina begonia</i>                     | F USA: TX, Starr Co., Rio Grande City, Fort Ringgold                                           |           | 26.37038, -98.80675  | Don J. Harvey                           | USNM | NVG170206-72  |                 |                          |
| 197 | NVG-4978        | <i>Gorgythion beggia</i>                    | M French Guiana: Montrivel                                                                     |           | 4.91667, -52.26666   | Nick V. Grishin                         | USNM | NVG151101-29  | USNMNT 00894731 |                          |
| 198 | NVG-17093D12    | <i>Ephyrilades brunnea brunnea</i>          | M Cuba: Guantanamo Bay                                                                         |           | 19.91170, -75.10760  | S. W. Droegge                           | USNM | NVG170107-26  |                 |                          |
| 199 | NVG-7570        | <i>Gesta gesta</i>                          | M Dominican Republic: 14 km NW of Jarabacoa                                                    |           |                      | Everard M. Kinch                        | USNM | NVG170107-26  |                 |                          |
| 200 | NVG-6120        | <i>Erynis briza briza</i>                   | F USA: WV, Pendleton Co., FS112, 0.8 air mi W of Simoda                                        |           |                      | Qian Cong & Nick V. Grishin             | USNM | NVG170107-26  |                 |                          |
| 201 | NVG-17069E08    | <i>Heteropterus morphus</i>                 | F France: Foret de Fontainebleau, 77 Bois de la Hardle                                         |           |                      |                                         | USNM | NVG170205-52  | USNMNT 00894386 |                          |
| 202 | PAO-69          | <i>Carterocephalus mandan</i>               | USA: CA, Sierra Co., Tahoe National Forest, Mohawk-Chapman Rd.                                 |           |                      |                                         | USNM | NVG170205-52  | USNMNT 01321607 |                          |
| 203 | NVG-7767        | <i>Hovelia pardalina</i>                    | F Madagascar: Fianarantsoa Prov., 7 km SW Ranomafana                                           | 1150 m    | 18.04918, -85.77315  | Freddy Quesada                          | USNM | NVG161105-22  | 04-SRNP-13073   |                          |
| 204 | NVG-7349        | <i>Dardarina dardaris</i>                   | Costa Rica: Guanacaste Prov., ACG, Sector Santa Elena, Casa Potrero Grande                     | 17 m      | 10.84918, -85.07003  | Nick V. Grishin                         | USNM | NVG170207-66  |                 |                          |
| 205 | NVG-6454        | <i>Piruna pilus</i>                         | M USA: CO, Grand Co., 4 air mi SSE Hot Sulphur Springs, CR50, 4 air mi SE USH40                | 2563 m    | 40.02139, -106.07003 | Nick V. Grishin                         | USNM | NVG170207-66  |                 |                          |
| 206 | NVG-16108G04    | <i>Butleria flavomaculatus validivianus</i> | Chile: Valdivia Prov., Rincon de Piedra, 30 km SE Valdivia                                     |           |                      | Com. & Mignon Davis & B. Akerbergs      | USNM | NVG151101-98  | USNMNT 00894446 |                          |
| 207 | NVG-17069C03    | <i>Argatopon pumilae</i>                    | M Chile: Nuble, Las Trancas, 73 km E Chillan                                                   | 1100 m    | 6-7-Feb-1979         |                                         | USNM | NVG151101-98  | USNMNT 01321981 |                          |
| 208 | NVG-16106A10    | <i>Trapezes symmamus</i>                    | M Australia: Sydney                                                                            |           | 17-May-1963          |                                         | LACM | NVG170205-45  | USNMNT 01321600 |                          |
| 209 | NVG-7760        | <i>Spineta flammata</i>                     | M Australia: New South Wales, Brown Mountain                                                   |           | 16-Feb-1985          |                                         | LACM | NVG170206-100 | USNMNT 01321755 |                          |
| 210 | NVG-7915        | <i>Acanachus stigmata shanda</i>            | M Myanmar: S. Shan State, Kalaw Reservoir                                                      |           |                      | Fred Sattler                            | USNM | NVG161007-18  |                 |                          |
| 211 | NVG-7291        | <i>Amphitax abdoscentis cameris</i>         | M Myanmar: S. Shan State, Paja Gyi Gon, Tagyi Yedwet                                           | 1600'     |                      | Stephen Kinyon                          | USNM | NVG161007-18  |                 |                          |
| 212 | NVG-7394        | <i>Asitocopterus lama lama</i>              | M Myanmar: Mandalay Div., Alaungdaw Kathapa Nat. Park                                          |           |                      | Stephen Kinyon                          | USNM | NVG161105-54  |                 |                          |
| 213 | NVG-7381        | <i>Cuphura puerca</i>                       | M Myanmar: Rakhine Div., Alaungdaw Kathapa Nat. Park                                           |           |                      | Stephen Kinyon                          | USNM | NVG161105-54  |                 |                          |
| 214 | NVG-7375        | <i>Taractrocyba maevius sagara</i>          | M Myanmar: Chitine Div., Gwatwsp Kan Tha Yar                                                   |           |                      | Stephen Kinyon                          | USNM | NVG170205-68  |                 |                          |
| 215 | NVG-7783        | <i>Tellico ta sp.</i>                       | M Philippines: Palawan                                                                         |           |                      |                                         | USNM | NVG170205-68  |                 |                          |
| 216 | NVG-7910        | <i>Erioceta thox</i>                        | USA: HI, Molokai, Kamakou Preserve                                                             |           |                      | Dan Robnoff                             | USNM | NVG170206-95  | USNMNT 01321623 |                          |
| 217 | NVG-7340        | <i>Notocrypta feistamelli</i>               | M Myanmar: S. Shan State, Kalaw Reservoir                                                      |           |                      | Stephen Kinyon                          | USNM | NVG161105-13  |                 |                          |
| 218 | NVG-7290        | <i>Panama quatuor</i>                       | M Myanmar: S. Shan State, Kalaw City                                                           | 4400'     |                      | Stephen Kinyon                          | USNM | NVG161007-17  |                 |                          |
| 219 | NVG-7389        | <i>Caloris sinius lasca</i>                 | M Myanmar: S. Shan State, Kalaw Reservoir                                                      |           |                      | Stephen Kinyon                          | USNM | NVG161105-62  |                 |                          |
| 220 | NVG-16107D09    | <i>Atrytonopsis hianna hianna</i>           | F USA: WI, Burnett Co., Grex Meadows WMA                                                       |           | 20.60335, 96.52999   | Stephen Kinyon                          | USNM | NVG161105-62  |                 |                          |
| 221 | NVG-4767        | <i>Hesperia meskei straton</i>              | F USA: WI, Levy Co., W. of Williston Highlands, along FM337                                    |           | 45.90525, -92.56994  | William R. Dempwolf                     | USNM | NVG161105-62  |                 |                          |
| 222 | NVG-3203        | <i>Notomyia meskei similis</i>              | M USA: TX, Levy Co., W. of Williston Highlands, along FM337                                    |           | 29.35675, -82.60340  | Nick V. Grishin                         | USNM | NVG161105-62  |                 |                          |
| 223 | NVG-4534        | <i>Euphyes alon</i>                         | M USA: TX, Brewster Co., USH90, ca 10 mi W of Alpine                                           |           |                      | William W. McGuire                      | TAMU | NVG150111-19  |                 |                          |
| 224 | NVG-4538        | <i>Copaedus aurantica</i>                   | F USA: TX, Lamar Co., Pat Mayse WMA, FM1495 @ Craddock Creek                                   |           | 33.79423, -95.67425  | Nick V. Grishin                         | USNM | NVG150111-19  |                 |                          |
| 225 | NVG-9438        | <i>Thymelicus lineata lineola</i>           | M USA: WY, Park Co., Middle Creek Rd. nr. USH290, O. B. Jackson Ranch                          |           | 30.20033, -98.31613  | Nick V. Grishin                         | USNM | NVG150111-19  |                 |                          |
| 226 | NVG-5158        | <i>Panaguiua ocala ocala</i>                | F USA: WY, Park Co., Yellowstone National Park, nr. Mt. Washburn                               |           | 44.82619, -110.4475  | Qian Cong, Jing Zhang & Nick V. Grishin | USNM | NVG150111-19  |                 |                          |
| 227 | NVG-4591        | <i>Calpodus ethlius</i>                     | F USA: TX, Hidalgo Co., LaGrulla                                                               |           | 26.25794, -98.64946  | Nick V. Grishin                         | USNM | NVG150111-19  |                 |                          |
| 228 | NVG-4881        | <i>Abasolis copiacuanus</i>                 | F USA: TX, Cameron Co., La Feria, along FM506                                                  |           | 26.17756, -97.82410  | Qian Cong & Nick V. Grishin             | USNM | NVG150111-19  |                 |                          |
| 229 | NVG-8051        | <i>Choranthus vitellius</i>                 | M USA: FL, Monroe Co., Key West                                                                |           |                      | Nick V. Grishin                         | USNM | NVG170208-36  | USNMNT 01321891 |                          |
| 230 | NVG-8014        | <i>Anthropus insignis</i>                   | M USA: ST, Croix, St. George Botanical Gardens                                                 | 900'      | 17.71666, -64.83333  | W. E. Steiner & J. M. Swearingen        | USNM | NVG170207-99  | USNMNT 00275220 |                          |
| 231 | NVG-8059        | <i>Racta china</i>                          | M Guyana: Acaari Mts., Sipu R.                                                                 | 491 m     | 1.41833, -58.95333   | Steve Fratello et al.                   | USNM | NVG170208-44  | USNMNT 01321899 |                          |
| 232 | NVG-5496        | <i>Nastra julia</i>                         | M Peru: Madre de Dios, Amazonia Lodge                                                          |           |                      | Stephen Kinyon                          | USNM | NVG170208-44  | WHD3918         |                          |
| 233 | NVG-1769        | <i>Lerema acclis</i>                        | M USA: TX, Bastrop Co., Lost Pines boyscout camp                                               |           |                      | William R. Dempwolf                     | USNM | NVG170208-44  |                 |                          |
| 234 | NVG-17098F01    | <i>Duroca duraca duraca</i>                 | M USA: TX, Dallas Co., Dallas, White Rock Lake, Olive Shapiro Park                             | 1100 m    | 32.8621, -96.7305    | Qian Cong & Nick V. Grishin             | USNM | NVG170207-70  | USNMNT 00913432 |                          |
| 235 | NVG-7946        | <i>Niconoides incomptus</i>                 | M Brazil: Rio de Janeiro, Teresopolis, P. N. Serra dos Orgaos                                  | 290 m     | -22.45000, -43.00000 | Duarte & Souza                          | USNM | NVG170207-31  | 13-SRNP-22769   |                          |
| 236 | NVG-8007        | <i>Lychnophyta veneta</i>                   | Costa Rica: Guanacaste Prov., ACG, Sector El Hacha, Estacion Los Almendros                     | 1300 m    | 11.03226, -85.52776  | Roster Moraga                           | USNM | NVG170207-92  | USNMNT 01321847 |                          |
| 237 | NVG-17107B06    | <i>Wahydra kenwa</i>                        | Ecuador: Napo, Km. 49 Tena-Loreto Rd.                                                          | 6500'     | -0.71233, -77.74066  | Jason P. W. Hall & I. Aldas             | USNM | NVG170207-92  |                 |                          |
| 238 | NVG-7984        | <i>Pseudosarbia flavofasciata</i>           | M Venezuela: Aragua, 10 km W of Tovar                                                          | 350-400 m | -14.21666, -56.20000 | E. Furtado                              | USNM | NVG170207-69  | USNMNT 01321824 |                          |
| 239 | NVG-7985        | <i>Carystus phorcus</i>                     | Brazil: Mato Grosso, Diamantino, Aho Rio Arinos                                                | 305 m     |                      | Stan S. Nicolay                         | USNM | NVG170207-70  | USNMNT 01321825 |                          |
| 240 | NVG-7925        | <i>Carystus phorcus</i>                     | Brazil: Goiás, Santa Rita do Araguaia, 163 Km W. Jatai                                         | 305 m     | 10.77175, -85.43400  | Jose Alberto Sanchez                    | USNM | NVG170207-43  | 13-SRNP-57133   |                          |
| 241 | NVG-8008        | <i>Melo mango</i>                           | Costa Rica: Guanacaste Prov., ACG, Sector Rincon Rain Forest, Estacion Caribe                  | 415 m     | 10.53333, -82.80000  | Brian Harris                            | USNM | NVG170207-43  | 13-SRNP-44273   |                          |
| 242 | NVG-7955        | <i>Parichares variegata</i>                 | M Brazil: Rondonia, 62 km S Arqueues, Fazenda Rancho Grande                                    | 165 m     | -10.53333, -62.80000 | Duvalier Bricelho                       | USNM | NVG170207-43  | USNMNT 01321848 |                          |
| 243 | NVG-7986        | <i>Alera haworthiana</i>                    | Costa Rica: Alajuela Prov., ACG, Brasilia, Moga                                                | 320 m     | 11.01227, -85.34929  | Duvalier Bricelho                       | USNM | NVG170207-43  | USNMNT 01321848 |                          |
| 244 | NVG-7986        | <i>Alera haworthiana</i>                    | M Brazil: Rondonia, 62 km S Arqueues, Fazenda Rancho Grande                                    | 165 m     | -10.53333, -62.80000 | Brian Harris                            | USNM | NVG170207-71  | USNMNT 01321826 |                          |
| 245 | NVG-7956        | <i>Oreus cynisca</i>                        | Costa Rica: Alajuela Prov., ACG, Sector Rincon Rain Forest, Rio Francia Arriba                 | 400 m     | 10.89666, -85.25003  | Minor Carmona                           | USNM | NVG170207-41  | 08-SRNP-40358   |                          |
| 246 | NVG-7987        | <i>Lycas argenea</i>                        | M Argentina: Misiones, Garuape                                                                 | 800 m     | -26.80000, -54.97000 | Brian Harris                            | USNM | NVG170207-72  | USNMNT 01321827 |                          |
| 247 | NVG-8009        | <i>Lycas argenea</i>                        | F Colombia: Putumayo, Mocora, rain forest in Andean foothills                                  |           |                      | James A. Scott                          | USNM | NVG170207-94  | USNMNT 01321849 |                          |
| 248 | NVG-2761        | <i>Orphe vatininus</i>                      | F Colombia: Putumayo, Mocora, rain forest in Andean foothills                                  |           |                      | James A. Scott                          | USNM | NVG170207-94  | USNMNT 01321849 |                          |
| 249 | NVG-1504        | <i>Megathymus ursus ursus</i>               | F USA: NM, Eddy Co., Lincoln National Forest, S FM409, 2 air mi NE Sitting Bull Falls          |           |                      | Nick V. Grishin                         | USNM | NVG170207-94  | USNMNT 01321849 |                          |
| 250 | NVG-1647        | <i>Megathymus ursus violae</i>              | F USA: TX, Pecos Co., Glass Mtns.                                                              |           |                      | Nick V. Grishin                         | USNM | NVG170207-94  | USNMNT 01321849 |                          |
| 251 | NVG-1670        | <i>Pterourus glaucus glaucus</i>            | M USA: TX, Denton Co., Lake Ray Roberts State Park, Greenbelt Corridor along the Trinity River |           | 33.25336, -97.0434   | Nick V. Grishin                         | USNM | NVG170207-94  | USNMNT 01321849 |                          |

Table S2. Data for Hesperidae specimens with COI barcodes

| #  | DNA Voucher            | Taxon name                            | TypSex | Locality                                                                           | Elevation | GPS                  | Collectors                                      | Date                                            | Collection      | Genitalia No.           | Collection No.          |
|----|------------------------|---------------------------------------|--------|------------------------------------------------------------------------------------|-----------|----------------------|-------------------------------------------------|-------------------------------------------------|-----------------|-------------------------|-------------------------|
| 1  | 1 NVG-7868             | <i>Allora doloschallii</i>            | M      | Solomon Islands: Guadalcanal, Honiara                                              |           |                      | R. H. Carcasson                                 | 26-31-Mar-1972                                  | USNM            | NVGI70206-53            | USNMENT 01321708        |
| 2  | 2 NVG-7751             | <i>Badamia exclamatoria</i>           | M      | Myanmar: Rakhine Div., GwaThwep Ye Phya, Chaung                                    |           |                      | Aung Gyi                                        | 2-9-May-2003                                    | USNM            | NVGI70206-56            | USNMENT 01321591        |
| 3  | 3 NVG-7867             | <i>Burara oedipoda oedipoda</i>       | M      | Philippines: Palawan                                                               | 1600'     | 22.32333, 94.48000   | Stephen S. Kinyon                               | 1986                                            | USNM            | NVGI70206-52            | USNMENT 01321707        |
| 4  | 4 NVG-7865             | <i>Burara gonata lalita</i>           | M      | Myanmar: Mandalay Div., Alaungdaw Khattapa NP                                      | 5100'     | 20.61500, 96.57667   | Stephen S. Kinyon                               | 22-Sep-2001                                     | USNM            | NVGI70206-51            | USNMENT 01321706        |
| 5  | 5 NVG-7866             | <i>Burasa mahabata</i>                | M      | Myanmar: S. Shan State, Kalaw, Mikrowaw Tower                                      | 900 m     |                      | W. E. Steiner                                   | 29-Sep-2001                                     | USNM            | NVGI70206-50            | USNMENT 01321705        |
| 6  | 6 NVG-7871             | <i>Telidorea ramanatek ramanatek</i>  | M      | Madagascar: Fianarantsoa Prov., 7 km W Ranomafana                                  |           |                      | T. H. E. Jackson                                | 20-31-Jan-1990                                  | USNM            | NVGI70206-56            | USNMENT 01321711        |
| 7  | 7 NVG-7873             | <i>Pyrrhocalia iphis</i>              | F      | Nigeria: Abakaliki Prov., Oboutra                                                  |           |                      | Leo F. Macstratto                               | Nov-1982                                        | USNM            | NVGI70206-58            | USNMENT 01321713        |
| 8  | 8 NVG-7872             | <i>Coelades forestan forestan</i>     | F      | Zaire: Kasai-Oriental, Mbende Ditu                                                 |           |                      | Stephen S. Kinyon                               | 10-Mar-1987                                     | USNM            | NVGI70206-57            | USNMENT 01321712        |
| 9  | 9 NVG-7870             | <i>Coelades libson</i>                | M      | Cameroon: Mt. Kala                                                                 | 250-500'  | 4.33033, -58.79850   | Stephen S. Kinyon                               | 5-8-Nov-2003                                    | FMNH            | NVGI70206-55            | USNMENT 01321710        |
| 10 | 10 NVG-14102C09        | <i>Hyalothyrus infernalis</i>         | M      | Guyana: Iwokrama Mts., Iwokrama Rainforest Reserve, Site 2                         | 1000-1500 | 3.32500, -59.55833   | S. Fraello, R. Hamer, S. Hendricks, R. Williams | 21-Feb-10-Mar-1999                              | FMNH            |                         |                         |
| 11 | 11 NVG-14102A06        | <i>Hyalothyrus leucomeles</i>         | M      | Brazil: Rondonia, Fazenda Rancho Grande nr. Ariquemes                              |           |                      | D. H. & A. C. Kistner                           | 8-Oct-1993                                      | FMNH            |                         |                         |
| 12 | 12 NVG-14061E06        | <i>Hyalothyrus nitrosus</i>           | M      | Guyana: Region 9, Kanuka Mts., Nappi Mt.                                           |           |                      | J.-Y. Gallard                                   | 31-Aug-1989                                     | USNM            |                         | Hermier no 2069         |
| 13 | 13 NVG-14061G12        | <i>Entheus eunyas</i>                 | M      | French Guiana: MgCheaux                                                            |           |                      | Brian Harris                                    | 19-29-Sep-1996                                  | USNM            |                         |                         |
| 14 | 14 NVG-2333            | <i>Entheus eunyas</i>                 | F      | Brazil: Rondonia, 62 km S Ariquemes, Fazenda Rancho Grande                         |           |                      | Chris J. Durden                                 | 12-Dec-1990                                     | TWMC            | NVGI40403-61            | Hermier no 23649        |
| 15 | 15 NVG-2618            | <i>Entheus telesus</i>                | M      | French Guiana: Montagnes de la Trinité, Crique Aya                                 |           |                      | J.P. Champenois & B. Vincent                    | 12-Jan-2007                                     | Hermier         |                         |                         |
| 16 | 16 NVG-2618            | <i>Entheus telesus</i>                | M      | Brazil: Rondonia, 62 km S Ariquemes, linha C-20, 7km E B-65, Fazenda Rancho Grande |           |                      | Jim P. Brock                                    | 7-Nov-1991                                      | USNM            |                         |                         |
| 17 | 17 JPB-11-BOA-13383D10 | <i>Entheus aureanota</i>              | M      | Brazil: Rondonia, 62 km S Ariquemes, linha C-20, 7km E B-65, Fazenda Rancho Grande | 200-400'  | 5.15533, -58.69567   | S. Fratello et al.                              | 31-Jan-12-Feb-2001                              | USNM            |                         |                         |
| 18 | 18 NVG-14061H01        | <i>Entheus matho dilus</i>            | M      | Brazil: Santa Catarina, Joinville                                                  | 0-200 m   | 4.54167, -52.15000   | J. Miers                                        | 6-Jan-1990                                      | USNM            |                         | Hermier no 24684        |
| 19 | 19 NVG-2481            | <i>Entheus lemma</i>                  | F      | French Guiana: Camp Patawa                                                         |           |                      | 4.54167, -52.15833                              | J.-A. Corda                                     | 10-Sep-2002     | Bernard Hermier         | Hermier no 22762        |
| 20 | 20 NVG-2481            | <i>Entheus ganthus</i>                | F      | French Guiana: Camp Patawa                                                         |           |                      | 4.54167, -52.15833                              | J.-A. Corda                                     |                 |                         |                         |
| 21 | 21 NVG-14101B12        | <i>Entheus fluviatosa</i>             | M      | Colombia: Santander Dept., 18 air km SW Barrancabermeja, El Centro                 | 100-150 m | 6.93333, -73.75000   | F. Johnson                                      | 26-Oct-1993                                     | AMNH            |                         |                         |
| 22 | 22 NVG-14101B12        | <i>Entheus fluviatosa</i>             | M      | Colombia: Santander Dept., 18 air km SW Barrancabermeja, El Centro                 |           |                      | Jim P. Brock                                    | 26-Oct-1993                                     | AMNH            |                         |                         |
| 23 | 23 JPB-11-BOA-13383D09 | <i>Entheus aureobis</i>               | M      | Brazil: Rondonia, 62 km S Ariquemes, linha C-20, 7km E B-65, Fazenda Rancho Grande | 610 m     | -1.02567, -77.65700  | David H. Ahrenholz                              | 23-Oct-2000                                     | USNM            | X-5315 J. M. Burns 2002 |                         |
| 24 | 24 NVG-14063E03        | <i>Dyscophellus erythras</i>          | F      | Ecuador: Napo, Hill NW of Mishahuili, Jungle Lodge Hotel                           | 350-400 m | -14.21667, -56.20000 | E. Furtado                                      | 23-Jul-1991                                     | USNM            | X-4311 J. M. Burns 1998 |                         |
| 25 | 25 NVG-14063C04        | <i>Sarmientoia almeidai</i>           | M      | Brazil: Mato Grosso, Diamantino, Alto Rio Arinos                                   | 350-400 m | -14.21667, -56.20000 | E. Furtado                                      | 30-Nov-1990                                     | USNM            |                         |                         |
| 26 | 26 NVG-14063A04        | <i>Sarmientoia similis</i>            | M      | Brazil: Mato Grosso, Diamantino, Alto Rio Arinos                                   |           |                      | 3.44353, -72.84973                              | R. K. Robbins                                   | 24-Sep-1995     | USNM                    |                         |
| 27 | 27 NVG-14063A04        | <i>Parphyrogenes ompale</i>           | M      | Peru: Loreto, Yanamono, Explorama Lodge                                            |           |                      | 8.01981, -77.73250                              | John R. MacDonald                               | 22-Jul-2013     | John MacDonald          | RRA 0834                |
| 28 | 28 NVG-14062H09        | <i>Parphyrogenes speciosus</i>        | M      | Panama: Darien, vic. Of Cerro Pirre, Rancho Frio campsite                          | 330 m     | 9.28333, -79.00000   | G. B. Small                                     | 10-May-1978                                     | USNM            |                         | Hermier no 22337        |
| 29 | 29 NVG-14062H09        | <i>Parphyrogenes speciosus</i>        | M      | Panama: Darien, vic. Of Cerro Pirre, Rancho Frio campsite                          |           |                      | M. Thouvenot                                    | 5-Apr-2003                                      | Bernard Hermier |                         |                         |
| 30 | 30 NVG-2593            | <i>Parphyrogenes spandix</i>          | M      | French Guiana: Route forestiere de Belizton, Montagne Tortue                       | 330 m     | 9.28333, -79.00000   | G. B. Small                                     | 4-Jun-1978                                      | USNM            |                         |                         |
| 31 | 31 NVG-14063A03        | <i>Cecropaterus sincta</i>            | F      | USA: TX, Brewster Co., Big Bend National Park, Green Gulch                         |           |                      | 29.27699, -103.28359                            | Nick V. Grishin                                 | 21-Sep-2004     |                         |                         |
| 32 | 32 NVG-222             | <i>Cecropaterus velticulus</i>        | F      | Panama: Chiriqui, Volcan Baru                                                      |           |                      | G. B. Small                                     | 1-Feb-1976                                      | USNM            |                         |                         |
| 33 | 33 NVG-14062E08        | <i>Cecropaterus mexicanus</i>         | M      | Mexico: Oaxaca, N Slope Sierra Madre Sur., San Jose Pacifico                       |           |                      | William H. Howe                                 | 26-Jul-1991                                     | LACM            |                         |                         |
| 34 | 34 NVG-14114B01        | <i>Cecropaterus davisii</i>           | M      | USA: AZ, Pima Co., Santa Rita Mts., Box Canyon                                     |           |                      | Thomas W. Kral                                  | 26-Jul-1991                                     | LACM            |                         |                         |
| 35 | 35 NVG-14065A10        | <i>Cecropaterus virescens</i>         | M      | Guyana: Iwokrama Mts., Iwokrama Rainforest Reserve, Site 2                         | 250-500'  | 4.33033, -58.79850   | S. Fratello                                     | 5-8-Nov-2003                                    | FMNH            |                         |                         |
| 36 | 36 NVG-14102B09        | <i>Cecropaterus virescens</i>         | M      | Guyana: Iwokrama Mts., Iwokrama Rainforest Reserve, Site 2                         | 500-2400' | 4.33033, -58.79850   | S. Fratello                                     | 9-17-Nov-2003                                   | FMNH            |                         |                         |
| 37 | 37 NVG-14102B10        | <i>Cecropaterus reductus</i>          | M      | Guyana: Iwokrama Mts., Iwokrama Rainforest Reserve, Site 3                         | 500-2400' | 4.33033, -58.79850   | S. Fratello                                     | 9-17-Nov-2003                                   | FMNH            |                         |                         |
| 38 | 38 NVG-15029E04        | <i>Cecropaterus trebia</i>            | F      | Venezuela: Puerto Cabello                                                          | 4200'     |                      | J. Powell                                       | prior to 1879                                   | ZMHB            |                         |                         |
| 39 | 39 NVG-15104G07        | <i>Spizocada cinara</i>               | F      | Brazil: Roraima, Mt. Roraima, Arabopó                                              |           |                      | C. Bezarko                                      | 26-Dec-1927                                     | AMNH            | SRS-764                 | Acc. 29780, Tate No. 40 |
| 40 | 40 NVG-15104G08        | <i>Spizocada cinara</i>               | F      | Brazil: Rio Grande do Sul, Pelotas                                                 |           |                      | C. Bezarko                                      | 5-Jan-1961                                      | AMNH            | G798                    |                         |
| 41 | 41 NVG-14062H10        | <i>Aurochton sulfureolus</i>          | M      | Brazil: Rio de Janeiro, Itatiaia Mts                                               | 1050m     |                      | Kinyon                                          | 12-Feb-2011                                     | USNM            |                         |                         |
| 42 | 42 NVG-14062G02        | <i>Aurochton neis</i>                 | M      | Peru: Cuzco, Quilacalzone, Cospinapa Road                                          |           |                      | S. S. Nicolay                                   | 11-May-1969                                     | USNM            |                         |                         |
| 43 | 43 NVG-14062F02        | <i>Aurochton integrifascia</i>        | M      | Brazil: Minas Gerais, Km 290 Rio-Belo, Barbacena                                   |           |                      | Bruno Poll                                      | Oct-1923                                        | CMNH            |                         | Genitalia Slide No. 312 |
| 44 | 44 NVG-15095A07        | <i>Narcosis mura</i>                  | M      | Brazil: Amazonas, Rio Madeira, Manicore                                            | 1450 m    |                      | Kinyon                                          | 10-Feb-2011                                     | USNM            |                         |                         |
| 45 | 45 NVG-14103H07        | <i>Astraptes mabillei</i>             | M      | Peru: Cuzco, San Pedro Lodge, Cospinapa Road                                       | 2400-3000 | 4.33033, -58.79850   | S. Fratello                                     | 10-15-Nov-2003                                  | FMNH            |                         |                         |
| 46 | 46 NVG-14102C08        | <i>Ergarytes socius sinus</i>         | M      | Guyana: Iwokrama Mts., Iwokrama Rainforest Reserve, Site 4                         |           |                      | Roy O. Kendall & C. A. Kendall                  | 3-Mar-1974                                      | TAMU            |                         |                         |
| 47 | 47 NVG-14111G05        | <i>Urbanus prodicus</i>               | F      | Mexico: Nuevo Leon, Hwy 60, ca 40 km WSW Linares                                   |           |                      |                                                 | 9-17-Nov-2003                                   | FMNH            |                         |                         |
| 48 | 48 NVG-14102B07        | <i>Urbanus parvus</i>                 | M      | Guyana: Iwokrama Mts., Iwokrama Rainforest Reserve, Site 3                         | 500-2400' | 4.33033, -58.79850   | S. Fratello                                     | 9-17-Nov-2003                                   | FMNH            |                         |                         |
| 49 | 49 NVG-14102B07        | <i>Urbanus parvus</i>                 | M      | Guyana: Iwokrama Mts., Iwokrama Rainforest Reserve, Site 3                         | 5000'     |                      |                                                 | 9-17-Nov-2003                                   | FMNH            |                         |                         |
| 50 | 50 NVG-14061E08        | <i>Telegonus siermaior</i>            | M      | Mexico: Nuevo Leon, 4 mi W Turbidite                                               | 700 m     |                      | Robbins & Caldas                                | 29-May-1994                                     | USNM            | 1403 J. M. Burns 1977   |                         |
| 51 | 51 NVG-14103H11        | <i>Telegonus elorus</i>               | M      | Brazil: Rio de Janeiro, P. N. do Itatiaia                                          |           |                      | T. Escalante                                    | Jun-1994                                        | AMNH            |                         |                         |
| 52 | 52 NVG-14082D02        | <i>Telegonus weymeri</i>              | F      | Mexico: Veracruz, Presidio                                                         | 2050 m    | -13.15000, -72.51667 | David H. Ahrenholz                              | 25-Oct-2001                                     | USNM            |                         |                         |
| 53 | 53 NVG-14104B03        | <i>Telegonus gausius</i>              | F      | Peru: Cuzco Dept., Santuario Historico Machu Picchu, Aguas Calientes               | 1380 m    |                      | Koptur                                          | 13-Jul-1979                                     | USNM            |                         |                         |
| 54 | 54 NVG-14103B12        | <i>Telegonus gausius</i>              | F      | Costa Rica: Puntarenas Prov., Monteverde                                           |           |                      | B. Heinenman                                    | 16-Jan-1969                                     | AMNH            | X-1347 J. M. Burns 1981 |                         |
| 55 | 55 NVG-14082H08        | <i>Telegonus jara</i>                 | F      | Jamaica: Trelawny, Crown's Land                                                    |           |                      | T. P. Friedlander & J. C. Schaffner             | 16-Apr-1999                                     | TAMU            | NVG150011-42            |                         |
| 56 | 56 NVG-3226            | <i>Coarctatus byxalis</i>             | M      | Mexico: Veracruz, 3.4 mi S Coscomatepec                                            |           |                      | J. R. Powers                                    | 1-Dec-1998                                      | LACM            |                         |                         |
| 57 | 57 NVG-14113D06        | <i>Coarctatus amianis</i>             | M      | Argentina: Misiones, Dorado                                                        |           |                      | -27.42000, -54.45000                            |                                                 | USNM            | X-1935 J. M. Burns 1983 |                         |
| 58 | 58 NVG-14107B06        | <i>Labrotractus uyudaka</i>           | M      | Mexico: Puebla, Jauillias                                                          | 2300 m    |                      | S. R. Steinhäuser                               | 18-Mar-1971                                     | AMNH            |                         |                         |
| 59 | 59 NVG-14101H08        | <i>Zestusa levana</i>                 | M      | El Salvador: Cerro Miramundo, Had. Montecristo                                     | 800-900 m | 0.88350, -78.51500   | I. R. Aldas                                     | prior to 1888                                   | ZMHB            |                         |                         |
| 60 | 60 NVG-15029H06        | <i>Zestusa staudingeri</i>            | M      | Guatemala                                                                          |           |                      | O. Gomes                                        | 27-Jul-2002                                     | USNM            |                         |                         |
| 61 | 61 NVG-14104A01        | <i>Ridens telegonoides</i>            | M      | Ecuador: Esmeraldas, Rio Chuchivi, km. 12.5, Lita-San Lorenzo Rd.                  |           |                      |                                                 | 10-Sep-1994                                     | MGCL            |                         |                         |
| 62 | 62 NVG-15025A03        | <i>Ectomis arphues</i>                | M      | Brazil: Rondonia, linha C-10 (at Rio Parão), off B-65, 5 km S Cacaulandia          |           |                      |                                                 | 16-Mar-1942                                     | AMNH            |                         |                         |
| 63 | 63 NVG-14101H02        | <i>Ectomis mirivana</i>               | M      | Venezuela: Caripito                                                                |           |                      | George T. Austin                                | 25-Oct-1996                                     | MGCL            |                         |                         |
| 64 | 64 NVG-15024H11        | <i>Ectomis metallescens</i>           | M      | Brazil: Rondonia, 62 km S Ariquemes, linha C-20, 7km E B-65, Fazenda Rancho Grande |           |                      | L. Senecauss & A. Doquuin                       | 16-Apr-1993                                     | USNM            |                         |                         |
| 65 | 65 NVG-14063C11        | <i>Oleides fenestratus</i>            | M      | French Guiana: Coraille PK2                                                        |           |                      | L. Richter                                      | 14-Mar-1946                                     | AMNH            | 6-USNM Dohlbainna       | Hermier no 4771         |
| 66 | 66 NVG-14101G07        | <i>Oleides fenestratus</i>            | M      | Colombia: Amazonas, Leticia                                                        |           |                      | O. Gomes                                        | 13-Jan-1994                                     | MGCL            | G1893                   |                         |
| 67 | 67 NVG-15092H12        | <i>Oleides guyanensis amazonensis</i> | M      | Brazil: Rondonia, 62 km S Ariquemes, linha C-10, 5 km S of Cacaulandia             |           |                      | Karsten                                         | prior to 1869                                   | ZMHB            | GTA-7451                | 5085                    |
| 68 | 68 NVG-15032C06        | <i>Typtheadon amber</i>               | M      | Venezuela?                                                                         |           |                      | E. C. Welling                                   | 13-Aug-1971                                     | AMNH            |                         |                         |
| 69 | 69 NVG-14101A06        | <i>Typtheadon aventinus</i>           | M      | Mexico: Oaxaca, Candelaria Loxicha                                                 |           |                      | 16.61250, -96.90056                             | John Kemper                                     | 30-Jul-1992     | USNM                    |                         |
| 70 | 70 11-BOA-13383E04     | <i>Typtheadon buena</i>               | M      | Mexico: Oaxaca, El Vado-San Sebastian                                              | 900 m     | -19.98333, -43.86667 | Robert K. Robbins & V. Becker                   | 21-Apr-1991                                     | USNM            | NVG131102-81            |                         |
| 71 | 71 11-BOA-13383E04     | <i>Cogia trullius</i>                 | M      | Brazil: Minas Gerais, Nova Lima                                                    | 350-400 m | -14.21667, -56.20000 | E. Furtado                                      | 21-Feb-1991                                     | USNM            | NVG131102-77            |                         |
| 72 | 72 11-BOA-13383E04     | <i>Cogia abdul</i>                    | F      | Brazil: Mato Grosso, Diamantino, Alto Rio Arinos                                   |           |                      |                                                 | 30-Apr-1991                                     | USNM            | NVG131102-75            |                         |
| 73 | 73 11-BOA-13383E04     | <i>Cogia hassan hassan</i>            | F      | Brazil: Distrito Federal, Planaltina                                               |           |                      | -15.58333, -47.66667                            | Robert K. Robbins & V. Becker                   |                 |                         |                         |
| 74 | 74 11-BOA-13383E07     | <i>Cogia grandis</i>                  | F      | Brazil: Rio de Janeiro, Teresopolis                                                |           |                      | -22.45000, -42.98333                            | R. K. Robbins & A. Caldas                       |                 |                         |                         |
| 75 | 75 11-BOA-15009G12     | <i>Cogia stylifera</i>                | M      | Brazil: Rondonia, vic. Cacaulandia                                                 |           |                      | -10.53333, -63.80000                            | J. Kemper                                       | 17-Dec-1996     | USNM                    |                         |
| 76 | 76 11-BOA-15009G12     | <i>Cogia goya</i>                     | M      | Brazil: Rondonia, vic. Cacaulandia                                                 |           |                      | 3.34500, -59.57000                              | S. Fraello, R. Hamer, S. Hendricks, R. Williams | 16-Oct-1991     | USNM                    | USNM ENT 00232390       |
| 77 | 77 11-BOA-15009G10     | <i>Cogia optica</i>                   | M      | Brazil: Rio Grande do Sul, Pelota                                                  | 500-1000' |                      | C. Bezarko                                      | 21-Feb-10-Mar-1999                              | AMNH            |                         |                         |
| 78 | 78 NVG-14101A05        | <i>Oechydus chersis chersis</i>       | M      | Peru: Cuzco, Cospinapa Road, Quitacalzone                                          |           |                      | Stephen S. Kinyon                               | 28-Nov-1959                                     | AMNH            |                         |                         |
| 79 | 79 NVG-14103B04        | <i>Iliana romulus</i>                 | M      | Brazil: Amazonas, Massauary                                                        |           |                      | Paul Hahnel, coll. Otto Staudinger              | prior to 1889                                   | ZMHB            |                         |                         |
| 80 | 80 NVG-15033D08        | <i>Xispia quadrata</i>                | M      | Guyana: Potaro River nr. Tuketi                                                    | 250-1000' |                      | Steve Fratello                                  | 18-23-Mar-1999                                  | USNM            |                         | USNMENT 00232398        |
| 81 | 81 11-BOA-13383A10     | <i>Xispia laddae</i>                  | M      | Guyana: Acarai Mts./river, Sipu R.                                                 | 2500-3000 | 1.37000, -58.96500   | S. Fratello et al.                              | 31-Oct-10-Nov-2000                              | USNM            |                         | USNMENT 00179664        |
| 82 | 82 11-BOA-13383A09     | <i>Myrina santa monika</i>            | M      | Guyana: Acarai Mts./river, Sipu R.                                                 |           |                      | George T. Austin                                | 19-Mar-1989                                     | MGCL            | SRS-3807                |                         |
| 83 | 83 NVG-15021B01        | <i>Morvina caecus</i>                 | F      | Brazil: Rondonia, 62 km S Ariquemes, linha C-20, 7km E B-65, Fazenda Rancho Grande | 180 m     |                      |                                                 | 4-Nov-1988                                      | USNM            |                         |                         |
| 84 | 84 11-BOA-13383F07     | <i>Morvina falisca falisca</i>        | M      | French Guiana: camp St. Elle, pk.15.5 on D21                                       | 0-100 m   | 5.26667, -53.03333   | Don J                                           |                                                 |                 |                         |                         |



**Table S3. Mitochondrial genomes downloaded from NCBI**

| NCBI accession number | Species                               |
|-----------------------|---------------------------------------|
| NC_027263.1           | <i>Hasora anura</i>                   |
| NC_027170.1           | <i>Hasora vitta</i>                   |
| KY630505              | <i>Megathymus beulahae beulahae</i>   |
| KY630503              | <i>Megathymus cofaqui cofaqui</i>     |
| KY630501              | <i>Megathymus streckeri streckeri</i> |
| KY630500              | <i>Megathymus yuccae yuccae</i>       |
| MF684858              | <i>Agathymus micheneri</i>            |

**Table S4. Proteins that are of low intra-species but high inter-species divergence between *Telegonus brevicauda* and *Telegonus chalco***

| Protein ID | Function annotation                               | GO terms                                                                                                                                                                                       | Flybase    |
|------------|---------------------------------------------------|------------------------------------------------------------------------------------------------------------------------------------------------------------------------------------------------|------------|
| 1113.2     | Unknown                                           | None                                                                                                                                                                                           | n/a        |
| 784.5      | Unknown                                           | GO:0006888, GO:0016192, GO:0016081, GO:0000149, GO:0000046, GO:0070050, GO:0097352, GO:0097111, GO:0007269, GO:0005886, GO:0005484, GO:0031201, GO:0000421                                     | CG7452-PB  |
| 2235.12    | Myosin light chain alkali                         | GO:0000146, GO:0006936, GO:0007498, GO:0005859, GO:0016459, GO:0005509                                                                                                                         | CG5596-PB  |
| 8205.2     | Unknown                                           | None                                                                                                                                                                                           | n/a        |
| 8205.4     | Protein maelstrom homolog                         | GO:0005737, GO:0051321, GO:0005634, GO:0030154, GO:0031047, GO:0003677, GO:0007275                                                                                                             | n/a        |
| 605.5      | Protein angel                                     | GO:0005575, GO:0003674, GO:0008150, GO:0007275                                                                                                                                                 | CG12273-PA |
| 605.4      | Unknown                                           | None                                                                                                                                                                                           | n/a        |
| 48208.1    | Fatty acid synthase (Fragment)                    | GO:0006633, GO:0016787, GO:0005835, GO:0016788, GO:0004312, GO:0003824, GO:0008270, GO:0008152, GO:0016874, GO:0055114, GO:0016491                                                             | CG17374-PC |
| 53687.1    | Unknown                                           | None                                                                                                                                                                                           | n/a        |
| 705.5      | Oxidative stress-responsive serine-rich protein 1 | GO:0070301                                                                                                                                                                                     | CG5056-PA  |
| 3772.2     | Lipase 1                                          | GO:0004806, GO:0006629, GO:0007586, GO:0016788, GO:0016042, GO:0005576                                                                                                                         | CG6113-PC  |
| 921.7      | Unknown                                           | None                                                                                                                                                                                           | n/a        |
| 59.45      | Arrestin domain-containing protein 2              | GO:0031410, GO:0007165, GO:0005886                                                                                                                                                             | CG1105-PA  |
| 637.49     | Unknown                                           | None                                                                                                                                                                                           | n/a        |
| 6749.3     | Cytochrome b-c1 complex subunit 8                 | GO:0021539, GO:0005743, GO:0005811, GO:0008121, GO:0006122, GO:0005739, GO:0021860, GO:0021766, GO:0005750, GO:0021854, GO:0030901, GO:0021548, GO:0070469, GO:0048039, GO:0021680, GO:0021794 | CG7580-PA  |
| 6749.2     | 39S ribosomal protein L22, mitochondrial          | GO:0003735, GO:0005739, GO:0005840, GO:0005762, GO:0006412                                                                                                                                     | CG4742-PA  |
| 12086.1    | Unknown                                           | None                                                                                                                                                                                           | n/a        |
| 139183.28  | Unknown                                           | None                                                                                                                                                                                           | n/a        |
| 3152.7     | Pseudouridine-5'-phosphate glycosidase            | GO:0016773, GO:0016798, GO:0005575, GO:0004730, GO:0008150, GO:0046113, GO:0046872                                                                                                             | CG2794-PA  |
| 2281.12    | UDP-glucuronosyltransferase 2B14                  | GO:0015020, GO:0005789, GO:0016021, GO:0008152, GO:0050488                                                                                                                                     | CG8652-PA  |
| 9912.3     | Tyrosine-protein kinase transforming protein Fes  | GO:0004715, GO:0006468, GO:0005515, GO:0008595, GO:0007465, GO:0005886, GO:0008288, GO:0018108,                                                                                                | CG18085-PA |

|         |                                                            |                                                                                                                                                                                                                                                                                                                                                |            |
|---------|------------------------------------------------------------|------------------------------------------------------------------------------------------------------------------------------------------------------------------------------------------------------------------------------------------------------------------------------------------------------------------------------------------------|------------|
|         |                                                            | GO:0005524, GO:0045467, GO:0045466, GO:0004714, GO:0045464, GO:0046534, GO:0004713, GO:0005887, GO:0042067, GO:0008293, GO:0007169, GO:0045678                                                                                                                                                                                                 |            |
| 2286.9  | Translin-associated factor X-interacting protein 1         | GO:0008898, GO:0016205, GO:0030154, GO:0007283, GO:0048471, GO:0007275                                                                                                                                                                                                                                                                         | CG10621-PA |
| 1148.8  | Unknown                                                    | None                                                                                                                                                                                                                                                                                                                                           | n/a        |
| 305.6   | Unknown                                                    | None                                                                                                                                                                                                                                                                                                                                           | n/a        |
| 4796.6  | Unknown                                                    | None                                                                                                                                                                                                                                                                                                                                           | n/a        |
| 2561.3  | B9 domain-containing protein 2                             | GO:0005737, GO:0036064, GO:0036038, GO:0042384, GO:0005813, GO:0005634, GO:0043015                                                                                                                                                                                                                                                             | CG42730-PA |
| 363.28  | Protein Jumonji                                            | GO:0001889, GO:0035097, GO:0003677, GO:0048863, GO:0005719, GO:0000122, GO:0005634, GO:0048538, GO:0048536, GO:0000977, GO:0042127, GO:0008285, GO:0045892, GO:0031061, GO:0051574, GO:0035098, GO:0001227, GO:0005700, GO:0061085, GO:0006351, GO:0003682, GO:0016568                                                                         | CG3654-PD  |
| 64457.1 | RPA-interacting protein                                    | GO:0006310, GO:0005737, GO:0016605, GO:0006281, GO:0005634, GO:0005730, GO:0006606, GO:0009411, GO:0006261, GO:0032403, GO:0046872                                                                                                                                                                                                             | n/a        |
| 39880.1 | Putative 1-phosphatidylinositol-3-phosphate 5-kinase FAB1C | GO:0044267, GO:0016308, GO:0016310, GO:0008333, GO:0000046, GO:0090332, GO:0008270, GO:0012506, GO:0046854, GO:0035556, GO:0005768, GO:0000285, GO:0005524                                                                                                                                                                                     | CG6355-PB  |
| 1964.4  | Unknown                                                    | None                                                                                                                                                                                                                                                                                                                                           | n/a        |
| 9599.1  | Gametocyte-specific factor 1                               | GO:0046872                                                                                                                                                                                                                                                                                                                                     | CG34283-PA |
| 22241.3 | Unknown                                                    | None                                                                                                                                                                                                                                                                                                                                           | n/a        |
| 259.11  | 15-hydroxyprostaglandin dehydrogenase [NAD(+)]             | GO:0005737, GO:0007567, GO:0045786, GO:0003824, GO:0051287, GO:0097070, GO:0004022, GO:0016404, GO:0006693, GO:0048812, GO:0007179, GO:0070403, GO:0007565, GO:0004957, GO:0030728, GO:0070493, GO:0055114                                                                                                                                     | CG4842-PA  |
| 2561.33 | Broad-complex core protein isoform 6                       | GO:0010629, GO:0003676, GO:0003677, GO:0008219, GO:0042332, GO:0005634, GO:0007552, GO:0048808, GO:0046872, GO:0048477, GO:0071390, GO:0035075, GO:0035072, GO:0035070, GO:0006914, GO:0048747, GO:0007458, GO:0040034, GO:0003700, GO:0001752, GO:0009608, GO:0007562, GO:0048813, GO:0045944, GO:0000977                                     | CG12236-PA |
| 3884.2  | Elongation of very long chain fatty acids protein 6        | GO:0005783, GO:0016021, GO:0030497, GO:0005789, GO:0009922, GO:0007283, GO:0030176, GO:0016740, GO:0042759, GO:0019367                                                                                                                                                                                                                         | CG3971-PA  |
| 4906.1  | Venom serine protease 34                                   | GO:0004252, GO:0005576, GO:0006508                                                                                                                                                                                                                                                                                                             | CG30371-PA |
| 3306.18 | Cytochrome P450 4C1                                        | GO:0042445, GO:0004497, GO:0016020, GO:0043231, GO:0020037, GO:0016705, GO:0046701, GO:0005789, GO:0070330, GO:0005506, GO:0055114, GO:0009055                                                                                                                                                                                                 | CG14032-PA |
| 813.5   | DNA transposase THAP9                                      | GO:0006310, GO:0043565, GO:0006313, GO:0004803, GO:0015074, GO:0016740, GO:0003676, GO:0046872                                                                                                                                                                                                                                                 | n/a        |
| 7793.1  | Unknown                                                    | None                                                                                                                                                                                                                                                                                                                                           | n/a        |
| 3463.5  | Ankyrin repeat and MYND domain-containing protein 1        | GO:0046872                                                                                                                                                                                                                                                                                                                                     | n/a        |
| 4948.6  | Protein timeless                                           | GO:0071482, GO:0007617, GO:0008062, GO:0046957, GO:0060086, GO:0005737, GO:0050764, GO:0000122, GO:0005634, GO:0048512, GO:0042749, GO:0048471, GO:0050766, GO:0007623, GO:0007622, GO:0007620, GO:0008134, GO:0006606, GO:0045187, GO:0045475, GO:0009649, GO:0009648, GO:0042306, GO:0030431, GO:0043234, GO:0005515, GO:0046982, GO:2000678 | CG3234-PB  |

|          |                                                 |                                                                                                                                                                                                                                                                                                                                                                                                                                                 |            |
|----------|-------------------------------------------------|-------------------------------------------------------------------------------------------------------------------------------------------------------------------------------------------------------------------------------------------------------------------------------------------------------------------------------------------------------------------------------------------------------------------------------------------------|------------|
| 263.5    | Unknown                                         | None                                                                                                                                                                                                                                                                                                                                                                                                                                            | n/a        |
| 729.9    | ATP synthase subunit b, mitochondrial           | GO:0015986, GO:0006909, GO:0046933, GO:0005811, GO:0005739, GO:0015992, GO:0008553, GO:0015078, GO:0000276                                                                                                                                                                                                                                                                                                                                      | CG8189-PA  |
| 2235.7   | Transmembrane emp24 domain-containing protein 3 | GO:0006892, GO:0033116, GO:0000003, GO:0005793, GO:0048193, GO:0005215, GO:0016021, GO:0006810, GO:0032580, GO:0005789, GO:0061357, GO:0015031, GO:0048042, GO:0005794, GO:0030126, GO:0030133, GO:0030135, GO:0022008, GO:0005783                                                                                                                                                                                                              | CG1967-PA  |
| 4189.3   | Protein SYS1 homolog                            | GO:0015031, GO:0016021, GO:0000139                                                                                                                                                                                                                                                                                                                                                                                                              | CG11753-PA |
| 655.42   | Protein msta, isoform A                         | GO:0008168, GO:0010629, GO:0042826, GO:0005515                                                                                                                                                                                                                                                                                                                                                                                                  | CG18033-PA |
| 52.1     | Unknown                                         | GO:0016772                                                                                                                                                                                                                                                                                                                                                                                                                                      | CG31975-PB |
| 7449.4   | Putative transporter svop-1                     | GO:0015075, GO:0016021, GO:0055085, GO:0008513                                                                                                                                                                                                                                                                                                                                                                                                  | CG15221-PB |
| 2074.33  | Unknown                                         | None                                                                                                                                                                                                                                                                                                                                                                                                                                            | n/a        |
| 2727.6   | Synaptosomal-associated protein 25              | GO:0006887, GO:0006906, GO:0045202, GO:0005484, GO:0007274, GO:0031201, GO:0030054, GO:0048489, GO:0005737, GO:0000149, GO:0016020, GO:0005886, GO:0016081, GO:0016082, GO:0048172, GO:0007269, GO:0007268, GO:0006893, GO:0043195, GO:0016192, GO:0031629, GO:0005515, GO:0019905                                                                                                                                                              | CG40452-PA |
| 4637.1   | Leucine-rich repeat-containing protein 71       | None                                                                                                                                                                                                                                                                                                                                                                                                                                            | n/a        |
| 2074.37  | Unknown                                         | None                                                                                                                                                                                                                                                                                                                                                                                                                                            | n/a        |
| 1803.13  | Unknown                                         | GO:0005737, GO:0008017, GO:0007476, GO:0016321, GO:0051015, GO:0003779, GO:0008157, GO:0030517, GO:0007411                                                                                                                                                                                                                                                                                                                                      | CG1822-PF  |
| 4509.8   | Unknown                                         | None                                                                                                                                                                                                                                                                                                                                                                                                                                            | n/a        |
| 29308.1  | Serine/threonine-protein kinase BRSK2           | GO:0006887, GO:0060590, GO:0000086, GO:0036503, GO:0018105, GO:0030010, GO:0007067, GO:0051301, GO:0005783, GO:0005737, GO:0043462, GO:0006487, GO:0031532, GO:0005813, GO:0000287, GO:1904152, GO:0004674, GO:0048471, GO:0005524, GO:0006468, GO:0030182, GO:0051117, GO:0007528, GO:0007409, GO:0061178, GO:0070059, GO:0050321                                                                                                              | CG6114-PA  |
| 496.4    | Peroxidase                                      | GO:0042600, GO:0046872, GO:0006909, GO:0020037, GO:0004601, GO:0045471, GO:0005576, GO:0042744, GO:0007306, GO:0022008, GO:0005506, GO:0006979, GO:0055114                                                                                                                                                                                                                                                                                      | CG3477-PA  |
| 3093.2   | Thymidylate kinase                              | GO:0045445, GO:0044281, GO:0004798, GO:0009041, GO:0007049, GO:0005737, GO:0006227, GO:0046939, GO:0015949, GO:0046686, GO:0005758, GO:0005524, GO:0008283, GO:0005759, GO:0043627, GO:0006233, GO:0046940, GO:0055086, GO:0006235, GO:0071363, GO:0005829, GO:0050145                                                                                                                                                                          | CG5757-PA  |
| 135779.1 | Calcylin-binding protein                        | GO:0007507, GO:0070062, GO:0005641, GO:0005654, GO:0030877, GO:0005875                                                                                                                                                                                                                                                                                                                                                                          | CG3226-PA  |
| 637.37   | UPF0691 protein C9orf116                        | GO:0005575, GO:0032313, GO:0003674, GO:0008150, GO:0005097                                                                                                                                                                                                                                                                                                                                                                                      | CG12816-PA |
| 2111.15  | Unknown                                         | None                                                                                                                                                                                                                                                                                                                                                                                                                                            | n/a        |
| 1216.6   | Protein argonaute-2                             | GO:0033227, GO:0030423, GO:0030422, GO:0030154, GO:0035087, GO:0048102, GO:0031054, GO:0070868, GO:0005737, GO:0007367, GO:0005634, GO:0004521, GO:0007349, GO:0070551, GO:0030529, GO:0035068, GO:1900153, GO:0016246, GO:0046872, GO:0070578, GO:0000932, GO:0000340, GO:0005845, GO:0035071, GO:0031047, GO:0060213, GO:0045071, GO:0035279, GO:0035278, GO:0090502, GO:0005844, GO:0035198, GO:0051607, GO:0007279, GO:0035195, GO:0035197, | CG7439-PC  |

|          |                                                            |                                                                                                                                                                                                                                                                                                            |            |
|----------|------------------------------------------------------------|------------------------------------------------------------------------------------------------------------------------------------------------------------------------------------------------------------------------------------------------------------------------------------------------------------|------------|
|          |                                                            | GO:0035190, GO:0006355, GO:0006351, GO:0005515, GO:0045947, GO:0016442, GO:0006413, GO:0003743                                                                                                                                                                                                             |            |
| 139062.1 | Plasminogen activator inhibitor 1                          | GO:0005615, GO:0009611, GO:0030162, GO:0004867, GO:0010951, GO:0045861, GO:0035009                                                                                                                                                                                                                         | CG7219-PA  |
| 209.1    | Exocyst complex component 4                                | GO:0050803, GO:0006904, GO:0007286, GO:0007009, GO:0003674, GO:0007298, GO:0005737, GO:0016028, GO:0000145, GO:0016020, GO:0000916, GO:0043147, GO:0009925, GO:0016324, GO:0000910, GO:0016081, GO:0016080, GO:0007269, GO:0005886, GO:0016192, GO:0007111, GO:0007110, GO:0090522, GO:0046907, GO:0015031 | CG2095-PA  |
| 1.14     | Unknown                                                    | None                                                                                                                                                                                                                                                                                                       | CG11380-PA |
| 4791.4   | Unknown                                                    | GO:0005634, GO:0003677                                                                                                                                                                                                                                                                                     | n/a        |
| 1497.3   | Ubiquinone biosynthesis O-methyltransferase, mitochondrial | GO:0008689, GO:0042060, GO:0004395, GO:0031314, GO:0006071, GO:0008425, GO:0006744, GO:0006743                                                                                                                                                                                                             | CG9249-PA  |
| 40100.1  | Muscle calcium channel subunit alpha-1                     | GO:0042045, GO:0006936, GO:0016324, GO:0070588, GO:0006816, GO:0016323, GO:0009790, GO:0005891, GO:0005245, GO:0046872                                                                                                                                                                                     | CG4894-PC  |
| 1516.11  | Acyl-CoA Delta(11) desaturase                              | GO:0006633, GO:0006629, GO:0017105, GO:0016717, GO:0005789, GO:0046872, GO:0016021, GO:0055114                                                                                                                                                                                                             | CG9747-PA  |
| 1821.15  | Unknown                                                    | GO:0005737, GO:0046872, GO:0046688, GO:0003700, GO:0005634, GO:0006875, GO:0006950, GO:0045944, GO:0006351, GO:0010038, GO:0000976, GO:0055069                                                                                                                                                             | CG3743-PC  |
| 1079.11  | NIF3-like protein 1                                        | GO:0005575, GO:0003674, GO:0008150, GO:0005739, GO:0005737                                                                                                                                                                                                                                                 | CG4278-PA  |
| 2485.11  | Unknown                                                    | None                                                                                                                                                                                                                                                                                                       | n/a        |
| 139183.8 | DnaJ homolog subfamily C member 10                         | GO:0015035, GO:0005788, GO:0016671, GO:0030433, GO:0045454, GO:0034975                                                                                                                                                                                                                                     | CG40178-PB |
| 412.16   | Ecdysteroid UDP-glucosyltransferase                        | GO:0016758, GO:0015020, GO:0008152                                                                                                                                                                                                                                                                         | CG6475-PD  |
| 2476.4   | Protein Vhl                                                | GO:0007424, GO:0007427, GO:0030154, GO:0007010, GO:0030891, GO:0006611, GO:0060438, GO:0005634, GO:0007026, GO:1900037, GO:0035149, GO:0016567, GO:0090307, GO:0016334, GO:0005515, GO:0061630, GO:0001525, GO:0004842, GO:0051297                                                                         | CG13221-PA |
| 6555.5   | Zinc finger protein 568                                    | GO:0003700, GO:0005634, GO:0006355, GO:0006351, GO:0003676, GO:0003677, GO:0046872                                                                                                                                                                                                                         | CG12299-PA |
| 1179.8   | Unknown                                                    | None                                                                                                                                                                                                                                                                                                       | n/a        |
| 1152.2   | Myrosinase 1                                               | GO:0019137, GO:0046872, GO:0005975, GO:0004553                                                                                                                                                                                                                                                             | CG9701-PA  |
| 3461.19  | Unknown                                                    | None                                                                                                                                                                                                                                                                                                       | n/a        |
| 1269.4   | Unknown                                                    | GO:0005615                                                                                                                                                                                                                                                                                                 | CG11852-PA |
| 5455.5   | Fungal protease inhibitor-1                                | GO:0004867                                                                                                                                                                                                                                                                                                 | n/a        |
| 28571.1  | Unknown                                                    | None                                                                                                                                                                                                                                                                                                       | n/a        |
| 4495.10  | Zinc finger protein 862                                    | GO:0006355, GO:0005634, GO:0046872, GO:0006351, GO:0003676                                                                                                                                                                                                                                                 | n/a        |
| 2925.18  | DNA polymerase alpha subunit B                             | GO:0005737, GO:0005654, GO:0000278, GO:0000722, GO:0000060, GO:0006271, GO:0006270, GO:0000082, GO:0032201, GO:0003887, GO:0006260, GO:0006261, GO:0003677, GO:0046982, GO:0005658, GO:0000723                                                                                                             | CG5923-PC  |
| 918.72   | Unknown                                                    | None                                                                                                                                                                                                                                                                                                       | n/a        |
| 918.73   | Unknown                                                    | None                                                                                                                                                                                                                                                                                                       | n/a        |
| 2064.13  | Unknown                                                    | None                                                                                                                                                                                                                                                                                                       | n/a        |
| 9752.3   | Cytochrome P450 6B6                                        | GO:0016705, GO:0043231, GO:0020037, GO:0002118, GO:0016020, GO:0005789, GO:0070330, GO:0050829, GO:0005506, GO:0055114, GO:0009055                                                                                                                                                                         | CG10245-PB |
| 3246.4   | Esterase FE4                                               | GO:0005575, GO:0008150, GO:0052689, GO:0008152                                                                                                                                                                                                                                                             | CG10175-PD |
| 1068.4   | Protein tramtrack, beta isoform                            | GO:0035147, GO:0048750, GO:0045467, GO:0035001, GO:0031208, GO:0003677, GO:0043388, GO:0007298,                                                                                                                                                                                                            | CG43365-PF |



|          |                                                          |                                                                                                                                                                                                                                                                                                                                                                                                                                                                                                                                                                                                                                                                                                                                                |            |
|----------|----------------------------------------------------------|------------------------------------------------------------------------------------------------------------------------------------------------------------------------------------------------------------------------------------------------------------------------------------------------------------------------------------------------------------------------------------------------------------------------------------------------------------------------------------------------------------------------------------------------------------------------------------------------------------------------------------------------------------------------------------------------------------------------------------------------|------------|
|          |                                                          | GO:0001078, GO:0002121, GO:0031987, GO:0040003, GO:0000122, GO:0005634, GO:0001709, GO:0007476, GO:0030707, GO:0001964, GO:0060446, GO:0042682, GO:0016476, GO:0046872, GO:0000980, GO:0048666, GO:0035151, GO:0017053, GO:0042803, GO:0042675, GO:0008360, GO:0045892, GO:0048053, GO:0007426, GO:0007422, GO:0048854, GO:0005700, GO:0048813, GO:0045944, GO:0006351, GO:0005515, GO:0000978, GO:0003682, GO:0046843                                                                                                                                                                                                                                                                                                                         |            |
| 1497.37  | Unknown                                                  | None                                                                                                                                                                                                                                                                                                                                                                                                                                                                                                                                                                                                                                                                                                                                           | n/a        |
| 21.2     | Alpha-tocopherol transfer protein-like                   | GO:0016020, GO:0005215, GO:0008431, GO:0006810, GO:0005622                                                                                                                                                                                                                                                                                                                                                                                                                                                                                                                                                                                                                                                                                     | CG2663-PA  |
| 2399.26  | Uncharacterized protein B0303.7                          | GO:0005575, GO:0008150, GO:0003674, GO:0005515                                                                                                                                                                                                                                                                                                                                                                                                                                                                                                                                                                                                                                                                                                 | CG7129-PA  |
| 811.3    | Viral cathepsin                                          | GO:0008234                                                                                                                                                                                                                                                                                                                                                                                                                                                                                                                                                                                                                                                                                                                                     | n/a        |
| 13513.1  | Oxygen-dependent choline dehydrogenase                   | GO:0050660, GO:0008802, GO:0008812, GO:0006066, GO:0019285, GO:0045455, GO:0055114, GO:0016491                                                                                                                                                                                                                                                                                                                                                                                                                                                                                                                                                                                                                                                 | CG9521-PA  |
| 35367.1  | 4-hydroxybenzoate polyprenyltransferase, mitochondrial   | GO:0004659, GO:0006383, GO:0016021, GO:0008412, GO:0002083, GO:0008299, GO:0005739, GO:0050832, GO:0005743, GO:0050830, GO:0048009, GO:0047293, GO:0005666, GO:0050829, GO:0008340, GO:0006744, GO:0006743                                                                                                                                                                                                                                                                                                                                                                                                                                                                                                                                     | CG9613-PA  |
| 113.7    | Unknown                                                  | None                                                                                                                                                                                                                                                                                                                                                                                                                                                                                                                                                                                                                                                                                                                                           | n/a        |
| 87225.1  | Unknown                                                  | None                                                                                                                                                                                                                                                                                                                                                                                                                                                                                                                                                                                                                                                                                                                                           | n/a        |
| 15668.1  | CLIP-associating protein                                 | GO:0030426, GO:0007411, GO:0007067, GO:0030723, GO:0051225, GO:0005876, GO:0005737, GO:0040001, GO:0045172, GO:0005813, GO:0005634, GO:0000922, GO:0005815, GO:0005875, GO:0048477, GO:0043148, GO:0005525, GO:0016325, GO:0008017, GO:0032154, GO:0007051, GO:0007052, GO:0007282, GO:0046602, GO:0046580, GO:0000775, GO:0000776, GO:0035099, GO:0019827, GO:0000070, GO:0005827, GO:0051315, GO:0045169, GO:0000022, GO:0005819                                                                                                                                                                                                                                                                                                             | CG32435-PB |
| 34647.11 | Ankyrin repeat domain-containing protein 39              | None                                                                                                                                                                                                                                                                                                                                                                                                                                                                                                                                                                                                                                                                                                                                           | CG44001-PA |
| 5755.1   | Nuclear factor NF-kappa-B p100 subunit                   | GO:0019732, GO:0034138, GO:0019730, GO:0034134, GO:0038061, GO:0042308, GO:0006967, GO:0031594, GO:0038123, GO:0001077, GO:0038124, GO:0008063, GO:0006909, GO:0032496, GO:0002224, GO:0005737, GO:0002223, GO:0000122, GO:0005634, GO:0003713, GO:0005654, GO:0048511, GO:0034142, GO:0006366, GO:0035666, GO:0033257, GO:0048477, GO:0045087, GO:0002467, GO:0002268, GO:0034097, GO:0002755, GO:0008134, GO:0006952, GO:0048536, GO:0032481, GO:0034166, GO:0006954, GO:0006955, GO:0042994, GO:0051092, GO:0006974, GO:0002756, GO:0007568, GO:0007399, GO:0009950, GO:0003700, GO:0009620, GO:0005829, GO:0007249, GO:0034146, GO:0006355, GO:0030198, GO:0045944, GO:0005515, GO:0034162, GO:0030097, GO:0000978, GO:0003682, GO:0046843 | CG5848-PA  |
| 37761.1  | Phosphatidylethanolamine-binding protein homolog F40A3.3 | GO:0005575, GO:0008150, GO:0003674, GO:0008289, GO:0005739                                                                                                                                                                                                                                                                                                                                                                                                                                                                                                                                                                                                                                                                                     | CG6180-PA  |
| 11503.3  | Androgen-dependent TFPI-regulating protein               | GO:0016021, GO:0005886                                                                                                                                                                                                                                                                                                                                                                                                                                                                                                                                                                                                                                                                                                                         | n/a        |
| 3076.10  | Unknown                                                  | None                                                                                                                                                                                                                                                                                                                                                                                                                                                                                                                                                                                                                                                                                                                                           | n/a        |
| 1678.4   | G-protein coupled receptor Mth2                          | GO:0004930, GO:0016021, GO:0006950, GO:0005886, GO:0008340, GO:0007186                                                                                                                                                                                                                                                                                                                                                                                                                                                                                                                                                                                                                                                                         | CG17061-PB |
| 1678.6   | Multidrug resistance protein homolog 49                  | GO:0015893, GO:0042626, GO:0031427, GO:0042623, GO:0016021, GO:0006810, GO:0006855, GO:0015238,                                                                                                                                                                                                                                                                                                                                                                                                                                                                                                                                                                                                                                                | CG8523-PA  |

|         |                                                         |                                                                                                                                                                                                                                                                                                                                                                                                                                                                                                            |            |
|---------|---------------------------------------------------------|------------------------------------------------------------------------------------------------------------------------------------------------------------------------------------------------------------------------------------------------------------------------------------------------------------------------------------------------------------------------------------------------------------------------------------------------------------------------------------------------------------|------------|
|         |                                                         | GO:0008559, GO:0008354, GO:0005887, GO:0005886, GO:0001666, GO:0055085, GO:0005524                                                                                                                                                                                                                                                                                                                                                                                                                         |            |
| 3094.3  | Pickpocket protein 28                                   | GO:0009415, GO:0005272, GO:0042756, GO:0015280, GO:0016021, GO:0016020, GO:0006814, GO:0035002, GO:0035725, GO:0071462, GO:0005886                                                                                                                                                                                                                                                                                                                                                                         | CG8546-PC  |
| 43838.1 | Titin                                                   | GO:0035206, GO:0007498, GO:0030017, GO:0005875, GO:0051301, GO:0007062, GO:0007517, GO:0007519, GO:0031674, GO:0003779, GO:0030018, GO:0016203, GO:0008307, GO:0045214, GO:0000794, GO:0007520, GO:0007522, GO:0005863, GO:0007525, GO:0040011, GO:0004687, GO:0007076                                                                                                                                                                                                                                     | CG1915-PP  |
| 534.13  | Pleckstrin homology domain-containing family G member 5 | GO:0005089, GO:0005737, GO:0030139, GO:0007480, GO:0030027, GO:0005575, GO:0035025, GO:0008360, GO:0005911, GO:0035023, GO:0007155, GO:0048471, GO:0035767                                                                                                                                                                                                                                                                                                                                                 | CG42674-PC |
| 1.7     | Unknown                                                 | None                                                                                                                                                                                                                                                                                                                                                                                                                                                                                                       | n/a        |
| 4730.2  | Unknown                                                 | None                                                                                                                                                                                                                                                                                                                                                                                                                                                                                                       | n/a        |
| 2848.14 | Unknown                                                 | None                                                                                                                                                                                                                                                                                                                                                                                                                                                                                                       | n/a        |
| 13465.1 | Insulin-like receptor                                   | GO:0006468, GO:0043560, GO:0043559, GO:0016021, GO:0016020, GO:0008286, GO:0005010, GO:0051290, GO:0046777, GO:0004714, GO:0005009, GO:0007169, GO:0046872, GO:0043548, GO:0005524                                                                                                                                                                                                                                                                                                                         | CG10702-PB |
| 91807.1 | Rho guanine nucleotide exchange factor 12               | GO:0005089, GO:0016331, GO:0016020, GO:0035277, GO:0030589, GO:0097190, GO:0007349, GO:0035025, GO:0007411, GO:0001664, GO:0007277, GO:0005737, GO:0045177, GO:0070062, GO:0019992, GO:0007369, GO:0045179, GO:0045178, GO:0043065, GO:0016324, GO:0016476, GO:0007186, GO:0051056, GO:0038032, GO:0016328, GO:0007370, GO:0030478, GO:0005096, GO:0008360, GO:0090254, GO:0048011, GO:0007264, GO:0005826, GO:0007015, GO:0007375, GO:0050770, GO:0007377, GO:0005829, GO:0031532, GO:0070252, GO:0007374 | CG9635-PA  |
| 1763.4  | Unknown                                                 | None                                                                                                                                                                                                                                                                                                                                                                                                                                                                                                       | n/a        |
| 4612.4  | 4-nitrophenylphosphatase                                | GO:0046196, GO:0004035, GO:0006470, GO:0005829, GO:0000287, GO:0006796, GO:0016791, GO:0005634                                                                                                                                                                                                                                                                                                                                                                                                             | CG15739-PA |
| 13047.2 | Laminin subunit alpha-1                                 | GO:0061304, GO:0005201, GO:0045198, GO:0045995, GO:0007476, GO:0030155, GO:0031012, GO:0007155, GO:0060041, GO:0007166, GO:0031175, GO:0005615, GO:0043208, GO:0008406, GO:0060441, GO:0060445, GO:0006468, GO:0030334, GO:0009888, GO:0005911, GO:0043256, GO:0005606, GO:0005605, GO:0005604, GO:0007502, GO:0002011, GO:0005608, GO:0005576, GO:0005102, GO:0005578                                                                                                                                     | CG42677-PB |
| 700.7   | Circadian clock-controlled protein                      | GO:0007623, GO:0005615, GO:0032504                                                                                                                                                                                                                                                                                                                                                                                                                                                                         | CG10407-PA |
| 637.51  | Protein THEM6                                           | GO:0005575, GO:0008150, GO:0005576, GO:0003674                                                                                                                                                                                                                                                                                                                                                                                                                                                             | CG4666-PA  |
| 9.9     | Unknown                                                 | None                                                                                                                                                                                                                                                                                                                                                                                                                                                                                                       | n/a        |
| 2392.6  | Gelsolin                                                | GO:0006909, GO:0045010, GO:0005829, GO:0051016, GO:0051014, GO:0003779, GO:0005576, GO:0005884, GO:0030041, GO:0005509                                                                                                                                                                                                                                                                                                                                                                                     | CG1106-PB  |
| 17001.3 | Unknown                                                 | None                                                                                                                                                                                                                                                                                                                                                                                                                                                                                                       | n/a        |
| 10588.4 | Vinculin                                                | GO:0005737, GO:0007160, GO:0007016, GO:0006909, GO:0015629, GO:0051015, GO:0005198, GO:0003779, GO:0048812, GO:0005886, GO:0007155, GO:0005925                                                                                                                                                                                                                                                                                                                                                             | CG3299-PA  |
| 5826.4  | Mitoferrin                                              | GO:0016021, GO:0005740, GO:0005739, GO:0055072, GO:0005743, GO:0022857, GO:0048250, GO:0048515, GO:0005381, GO:0034755, GO:0055085                                                                                                                                                                                                                                                                                                                                                                         | CG4963-PA  |

|         |                                                             |                                                                                                                                                                                                                                                                                                                                                                                                                                                                                                                                                |            |
|---------|-------------------------------------------------------------|------------------------------------------------------------------------------------------------------------------------------------------------------------------------------------------------------------------------------------------------------------------------------------------------------------------------------------------------------------------------------------------------------------------------------------------------------------------------------------------------------------------------------------------------|------------|
| 5826.5  | Protein toll                                                | GO:0009897, GO:0019732, GO:0019730, GO:0006963, GO:0019955, GO:0006967, GO:0007165, GO:0008063, GO:0006955, GO:0007416, GO:0005737, GO:0070976, GO:0016021, GO:0009617, GO:0000281, GO:0002229, GO:0006952, GO:0042802, GO:0016201, GO:0009880, GO:0045087, GO:0035172, GO:0050832, GO:0050830, GO:0005887, GO:0005886, GO:0007155, GO:0007352, GO:0043234, GO:0007507, GO:0009950, GO:0009620, GO:0004888, GO:0045944, GO:0005515, GO:0030097, GO:0045610, GO:0005769, GO:0035007                                                             | CG5490-PC  |
| 1252.11 | Unknown                                                     | GO:0006633, GO:0005835, GO:0016788, GO:0004312, GO:0008270, GO:0055114, GO:0016491                                                                                                                                                                                                                                                                                                                                                                                                                                                             | CG17374-PC |
| 1252.10 | Fatty acid synthase                                         | GO:0006633, GO:0047451, GO:0006631, GO:0004320, GO:0015939, GO:0031325, GO:0008144, GO:0035338, GO:0008270, GO:0001649, GO:0016491, GO:0005737, GO:0070062, GO:0016295, GO:0005835, GO:0016020, GO:0071353, GO:0005739, GO:0006112, GO:0030879, GO:0005794, GO:0006767, GO:0006766, GO:0044822, GO:0004315, GO:0016788, GO:0047117, GO:0042587, GO:0005886, GO:0044255, GO:0055114, GO:0006084, GO:0042470, GO:0005829, GO:0004312, GO:0004313, GO:0016296, GO:0019432, GO:0004316, GO:0004317, GO:0004314, GO:0070402, GO:0004319, GO:0044281 | CG17374-PC |
| 1252.12 | Fatty acid synthase                                         | GO:0006633, GO:0047451, GO:0004320, GO:0008144, GO:0008270, GO:0001649, GO:0016491, GO:0005737, GO:0070062, GO:0016295, GO:0005835, GO:0016020, GO:0071353, GO:0005739, GO:0030879, GO:0005794, GO:0044822, GO:0004315, GO:0016788, GO:0047117, GO:0042587, GO:0005886, GO:0055114, GO:0006084, GO:0042470, GO:0004312, GO:0004313, GO:0016296, GO:0004316, GO:0004317, GO:0004314, GO:0070402, GO:0004319                                                                                                                                     | CG17374-PC |
| 10722.1 | Serine/threonine-protein phosphatase 6 regulatory subunit 2 | GO:0005737, GO:0019903, GO:0043231, GO:0043666                                                                                                                                                                                                                                                                                                                                                                                                                                                                                                 | CG10289-PD |
| 4000.5  | RNA exonuclease 4                                           | GO:0004527, GO:0044822, GO:0005634, GO:0003676, GO:0005730                                                                                                                                                                                                                                                                                                                                                                                                                                                                                     | CG6833-PA  |
| 2788.6  | Peptidyl-prolyl cis-trans isomerase-like 6                  | GO:0000413, GO:0006457, GO:0071011, GO:0005634, GO:0000398, GO:0003755, GO:0071013                                                                                                                                                                                                                                                                                                                                                                                                                                                             | CG1866-PA  |
| 15803.1 | Unknown                                                     | None                                                                                                                                                                                                                                                                                                                                                                                                                                                                                                                                           | CG31248-PA |
| 12243.7 | Unknown                                                     | GO:0005515                                                                                                                                                                                                                                                                                                                                                                                                                                                                                                                                     | n/a        |
| 581.7   | Folylpolyglutamate synthase, mitochondrial                  | GO:0005737, GO:0046901, GO:0006767, GO:0009396, GO:0007420, GO:0006139, GO:0005829, GO:0031100, GO:0004326, GO:0005739, GO:0005743, GO:0006766, GO:0001889, GO:0044281, GO:0005759, GO:0046655, GO:0006730, GO:0005524                                                                                                                                                                                                                                                                                                                         | CG2543-PA  |
| 15291.2 | Zinc finger protein 341                                     | GO:0005634, GO:0006355, GO:0008270, GO:0003676, GO:0003677, GO:0046872, GO:0006351                                                                                                                                                                                                                                                                                                                                                                                                                                                             | CG8301-PA  |
| 1186.11 | Niemann-Pick C1 protein                                     | GO:0046718, GO:0005635, GO:0005783, GO:0071383, GO:0007591, GO:0030301, GO:0007291, GO:0004872, GO:0007041, GO:0070062, GO:0006486, GO:0032374, GO:0016021, GO:0016020, GO:0031579, GO:0005576, GO:0046686, GO:0048471, GO:0031902, GO:0005794, GO:0016125, GO:0060548, GO:0006914, GO:0007628, GO:0005887, GO:0045456, GO:0042632, GO:0008206, GO:0008158, GO:0015248, GO:0008203, GO:0006897, GO:0015485, GO:0090150, GO:0071404, GO:0045121, GO:0042493, GO:0016242, GO:0005764, GO:0005765, GO:0004888, GO:0033344, GO:2000189, GO:0007165 | CG5722-PA  |

|          |                                                |                                                                                                                                                                                                                                                                                                                                                                                                                                                                        |            |
|----------|------------------------------------------------|------------------------------------------------------------------------------------------------------------------------------------------------------------------------------------------------------------------------------------------------------------------------------------------------------------------------------------------------------------------------------------------------------------------------------------------------------------------------|------------|
| 12614.8  | DNA replication complex GINS protein SLD5      | GO:0005737, GO:0000727, GO:0000278, GO:0032508, GO:0006270, GO:0000811, GO:0031298, GO:0046331, GO:0022008, GO:0043138, GO:1900087                                                                                                                                                                                                                                                                                                                                     | CG14549-PA |
| 3004.1   | Unknown                                        | None                                                                                                                                                                                                                                                                                                                                                                                                                                                                   | n/a        |
| 918.56   | Period circadian protein                       | GO:0004871, GO:0007619, GO:0007616, GO:0007617, GO:0042745, GO:0009416, GO:0007165, GO:0008062, GO:0060086, GO:0005737, GO:0000122, GO:0005634, GO:0003714, GO:0003712, GO:0048511, GO:0048512, GO:0048148, GO:0042803, GO:0007624, GO:0007623, GO:0007622, GO:0007620, GO:0008134, GO:0042752, GO:0045187, GO:0045892, GO:0045475, GO:0009649, GO:0009266, GO:0008340, GO:0006979, GO:0001306, GO:0045433, GO:0006355, GO:0005515, GO:0043153, GO:0046982, GO:2000678 | CG2647-PA  |
| 1344.4   | Unknown                                        | None                                                                                                                                                                                                                                                                                                                                                                                                                                                                   | n/a        |
| 5911.10  | Facilitated trehalose transporter Tret1        | GO:0022891, GO:0005355, GO:0015574, GO:0005353, GO:0015771, GO:0016021, GO:0016020, GO:0005886, GO:0055085                                                                                                                                                                                                                                                                                                                                                             | CG8234-PA  |
| 1821.7   | Unknown                                        | None                                                                                                                                                                                                                                                                                                                                                                                                                                                                   | n/a        |
| 1065.6   | 26S proteasome non-ATPase regulatory subunit 9 | GO:0005737, GO:0005838, GO:0005634, GO:0006974, GO:0006508, GO:0070682, GO:0008540                                                                                                                                                                                                                                                                                                                                                                                     | CG9588-PA  |
| 1821.3   | Unknown                                        | None                                                                                                                                                                                                                                                                                                                                                                                                                                                                   | n/a        |
| 1587.5   | OCIA domain-containing protein 1               | GO:0005794, GO:0035167, GO:0046425, GO:0031410, GO:0055037, GO:0035162, GO:0005764, GO:0003674, GO:0048542, GO:0005769, GO:0016021                                                                                                                                                                                                                                                                                                                                     | CG13533-PB |
| 41355.9  | Protein EFR3 homolog cmp44E                    | GO:0016079, GO:0016021, GO:0005886, GO:0000281, GO:0005623, GO:0007602, GO:0045202, GO:0007268, GO:0030100, GO:0048488                                                                                                                                                                                                                                                                                                                                                 | CG8739-PC  |
| 2173.23  | Zinc carboxypeptidase A 1                      | GO:0006508, GO:0022008, GO:0005615, GO:0004181, GO:0008270                                                                                                                                                                                                                                                                                                                                                                                                             | CG17633-PA |
| 85.8     | Nose resistant to fluoxetine protein 6         | GO:0007275, GO:0016021, GO:0006869, GO:0016747, GO:0008289                                                                                                                                                                                                                                                                                                                                                                                                             | CG42329-PA |
| 1886.29  | Putative cysteine proteinase CG12163           | GO:0005764, GO:0003674, GO:0098595, GO:0005615, GO:0035071, GO:0051603, GO:0035220, GO:0045169, GO:0005575, GO:0048102, GO:0004197, GO:0008150, GO:0004869, GO:0006508, GO:0022416                                                                                                                                                                                                                                                                                     | CG12163-PA |
| 11680.2  | Protein EFR3 homolog cmp44E                    | GO:0016079, GO:0016021, GO:0005886, GO:0000281, GO:0005623, GO:0007602, GO:0045202, GO:0007268, GO:0030100, GO:0048488                                                                                                                                                                                                                                                                                                                                                 | CG8739-PC  |
| 15258.1  | Unknown                                        | None                                                                                                                                                                                                                                                                                                                                                                                                                                                                   | n/a        |
| 1569.6   | Unknown                                        | GO:0046658, GO:0035152, GO:0019991, GO:0005576                                                                                                                                                                                                                                                                                                                                                                                                                         | CG14430-PA |
| 41355.4  | Unknown                                        | None                                                                                                                                                                                                                                                                                                                                                                                                                                                                   | n/a        |
| 738.15   | Unknown                                        | None                                                                                                                                                                                                                                                                                                                                                                                                                                                                   | n/a        |
| 5880.7   | Unknown                                        | None                                                                                                                                                                                                                                                                                                                                                                                                                                                                   | n/a        |
| 1926.5   | Ejaculatory bulb-specific protein 3            | GO:0007362, GO:0006468, GO:0007552, GO:0019992, GO:0009615, GO:0009617, GO:0045297, GO:0004674, GO:0005576, GO:0004672                                                                                                                                                                                                                                                                                                                                                 | CG9358-PA  |
| 7741.5   | Protein UXT homolog                            | GO:0006457, GO:0001106, GO:0016272, GO:0051082                                                                                                                                                                                                                                                                                                                                                                                                                         | CG15266-PA |
| 2215.1   | Unknown                                        | None                                                                                                                                                                                                                                                                                                                                                                                                                                                                   | CG15080-PA |
| 139068.3 | Homeobox protein Hox-A5                        | GO:0035289, GO:0001077, GO:0003677, GO:0035282, GO:0007275, GO:0008354, GO:0007417, GO:0043565, GO:0007366, GO:0000122, GO:0005634, GO:0000980, GO:0007350, GO:0035290, GO:0007506, GO:0003700, GO:0003705, GO:0006355, GO:0006357, GO:0045944, GO:0006351, GO:0001708                                                                                                                                                                                                 | CG2047-PA  |
| 5520.1   | Glutaryl-CoA dehydrogenase, mitochondrial      | GO:0050660, GO:0004361, GO:0006554, GO:0046949, GO:0000062, GO:0006568, GO:0005743, GO:0034641,                                                                                                                                                                                                                                                                                                                                                                        | CG9547-PA  |

|          |                                             |                                                                                                                                                                                                                                                         |            |
|----------|---------------------------------------------|---------------------------------------------------------------------------------------------------------------------------------------------------------------------------------------------------------------------------------------------------------|------------|
|          |                                             | GO:0005739, GO:0005875, GO:0046948, GO:0008152, GO:0005759, GO:0019395, GO:0016627, GO:0055114, GO:0044281                                                                                                                                              |            |
| 283.36   | Unknown                                     | None                                                                                                                                                                                                                                                    | n/a        |
| 50480.1  | Acyl-CoA Delta(11) desaturase               | GO:0006633, GO:0060179, GO:0009744, GO:0016021, GO:0070328, GO:0005783, GO:0017105, GO:0019216, GO:0046872, GO:0031410, GO:0016717, GO:0005811, GO:0006631, GO:0042593, GO:0042811, GO:0048047, GO:0004768, GO:0010506, GO:0006723, GO:0055114CG5887-PA | n/a        |
| 14826.3  | Probable G-protein coupled receptor 152     | GO:0004930, GO:0004181, GO:0008270, GO:0005887, GO:0006508, GO:0007186                                                                                                                                                                                  | CG3108-PA  |
| 17782.9  | Homologous-pairing protein 2 homolog        | GO:0006310, GO:0035259, GO:0051321, GO:0030331, GO:0050692, GO:0005634, GO:0050681, GO:0030374, GO:0046966, GO:0045944, GO:0003677, GO:0046983, GO:0042803                                                                                              | n/a        |
| 790.24   | Unknown                                     | None                                                                                                                                                                                                                                                    | n/a        |
| 2281.2   | Ecdysteroid UDP-glucosyltransferase         | GO:0016758, GO:0015020, GO:0008152                                                                                                                                                                                                                      | CG6653-PA  |
| 4105.8   | Unknown                                     | None                                                                                                                                                                                                                                                    | n/a        |
| 30044.1  | Tetratricopeptide repeat protein 36 homolog | GO:0005575, GO:0003674, GO:0008150, GO:0005515                                                                                                                                                                                                          | CG14105-PA |
| 5012.2   | Unknown                                     | None                                                                                                                                                                                                                                                    | n/a        |
| 3123.3   | Unknown                                     | None                                                                                                                                                                                                                                                    | CG13868-PA |
| 604.6    | Unknown                                     | None                                                                                                                                                                                                                                                    | n/a        |
| 341.2    | tRNA-splicing endonuclease subunit Sen54    | GO:0090502, GO:0090501, GO:0005730, GO:0004017, GO:0000214, GO:0006388, GO:0000379, GO:0006397                                                                                                                                                          | CG5626-PA  |
| 2132.14  | Unknown                                     | None                                                                                                                                                                                                                                                    | n/a        |
| 1817.26  | Protein PIH1D3                              | GO:0005737, GO:0030317, GO:0051087, GO:0070286                                                                                                                                                                                                          | CG5048-PA  |
| 106.16   | Serine protease HTRA2, mitochondrial        | GO:0004252, GO:0035234, GO:0016021, GO:0006915, GO:0005739, GO:0031966, GO:0007283, GO:0005515, GO:0016006, GO:0005758, GO:0008233, GO:0042981, GO:0006508, GO:0007005                                                                                  | CG8464-PA  |
| 139069.8 | UPF0160 protein MYG1, mitochondrial         | GO:0005654, GO:0070062, GO:0005634, GO:0005739, GO:0005575, GO:0035641, GO:0008150, GO:0003674                                                                                                                                                          | CG11980-PB |
| 9148.3   | Centrosomal protein of 97 kDa               | GO:0005737, GO:0043234, GO:0000242, GO:0030030, GO:0005813, GO:0005815, GO:0007099, GO:0005515, GO:0008599                                                                                                                                              | CG3980-PB  |
| 8873.3   | Nuclear nucleic acid-binding protein C1D    | GO:0005737, GO:0000178, GO:0005730, GO:0003723, GO:0003677, GO:0010468, GO:0006364                                                                                                                                                                      | CG8928-PA  |
| 5880.4   | Unknown                                     | GO:0005488                                                                                                                                                                                                                                              | n/a        |
| 396.5    | Unknown                                     | None                                                                                                                                                                                                                                                    | n/a        |
| 10845.1  | Unknown                                     | None                                                                                                                                                                                                                                                    | n/a        |
| 7622.7   | Chitotriosidase-1                           | GO:0005975, GO:0005615, GO:0008843, GO:0009617, GO:0000272, GO:0005764, GO:0005576, GO:0008061, GO:0006955, GO:0004568, GO:0006032                                                                                                                      | CG3044-PA  |
| 396.1    | Unknown                                     | GO:0006468, GO:0005524, GO:0004672                                                                                                                                                                                                                      | CG34356-PF |
| 1730.2   | Glucose dehydrogenase [FAD, quinone]        | GO:0050660, GO:0016614, GO:0008812, GO:0006066, GO:0046331, GO:0046693, GO:0008364, GO:0005576, GO:0006006, GO:0045455, GO:0055114, GO:0016491                                                                                                          | CG9518-PA  |
| 2848.6   | Unknown                                     | GO:0003677                                                                                                                                                                                                                                              | CG3838-PA  |
| 2247.5   | Dihydroxyacetone phosphate acyltransferase  | GO:0004366, GO:0005778, GO:0006650, GO:0005777, GO:0016287, GO:0005739, GO:0016746, GO:0008152, GO:0008611                                                                                                                                              | CG4625-PC  |
| 4482.3   | Acyl-CoA-binding protein                    | GO:0005794, GO:0050809, GO:0097038, GO:0036151, GO:0070062, GO:0006641, GO:0060291, GO:0042049, GO:0001942, GO:0006810, GO:0008289, GO:0000062, GO:0007611, GO:0005739, GO:0042742, GO:0004857,                                                         | CG8629-PA  |

|         |                                                                         |                                                                                                                                                                                                                                                                                                                                                                                                            |            |
|---------|-------------------------------------------------------------------------|------------------------------------------------------------------------------------------------------------------------------------------------------------------------------------------------------------------------------------------------------------------------------------------------------------------------------------------------------------------------------------------------------------|------------|
|         |                                                                         | GO:0021670, GO:0036042, GO:0001662                                                                                                                                                                                                                                                                                                                                                                         |            |
| 2913.19 | Glutathione S-transferase theta-1                                       | GO:0005737, GO:0004364, GO:0006749                                                                                                                                                                                                                                                                                                                                                                         | CG1702-PB  |
| 310.8   | Lamin-B receptor                                                        | GO:0005635, GO:0016628, GO:0005637, GO:0016021, GO:0016020, GO:0004872, GO:0003677, GO:0005521                                                                                                                                                                                                                                                                                                             | CG17952-PC |
| 937.1   | Alpha-ketoglutarate-dependent dioxygenase alkB homolog 7, mitochondrial | GO:0006631, GO:0051213, GO:0006974, GO:1902445, GO:0010883, GO:0005759, GO:0046872                                                                                                                                                                                                                                                                                                                         | CG14130-PA |
| 3050.8  | Unknown                                                                 | None                                                                                                                                                                                                                                                                                                                                                                                                       | n/a        |
| 8472.16 | Lipid droplet-associated hydrolase                                      | GO:0016787, GO:0030730, GO:0005783, GO:0016021, GO:0005811, GO:0034389, GO:0012505                                                                                                                                                                                                                                                                                                                         | CG9186-PB  |
| 1322.3  | Zinc finger and BTB domain-containing protein 14                        | GO:0005737, GO:0043565, GO:0000122, GO:0003700, GO:0005634, GO:0005654, GO:0048813, GO:0045892, GO:0000977, GO:0003676, GO:0046872, GO:0044212, GO:0006351                                                                                                                                                                                                                                                 | CG2116-PA  |
| 185.8   | 39S ribosomal protein L14, mitochondrial                                | GO:0003735, GO:0005739, GO:0005840, GO:0005762, GO:0006412                                                                                                                                                                                                                                                                                                                                                 | CG14048-PA |
| 1223.43 | Matrix metalloproteinase-2                                              | GO:0007424, GO:0035202, GO:0007426, GO:0004222, GO:0048477, GO:0005886, GO:0034769, GO:0007561, GO:0042060, GO:0031012, GO:0002218, GO:0046331, GO:0030425, GO:0071711, GO:0006508, GO:0040037, GO:0046529, GO:0008270                                                                                                                                                                                     | CG1794-PB  |
| 3306.12 | Mitochondrial cardiolipin hydrolase                                     | GO:0030719, GO:0007126, GO:0034587, GO:0035755, GO:0043046, GO:0016021, GO:0007286, GO:0016042, GO:0008053, GO:0005741, GO:0004519, GO:0046872, GO:0042803                                                                                                                                                                                                                                                 | n/a        |
| 7124.7  | Unknown                                                                 | GO:0016021, GO:0050909                                                                                                                                                                                                                                                                                                                                                                                     | n/a        |
| 2028.21 | Unknown                                                                 | GO:0006139, GO:0004017, GO:0005524                                                                                                                                                                                                                                                                                                                                                                         | CG9541-PD  |
| 2132.12 | Unknown                                                                 | None                                                                                                                                                                                                                                                                                                                                                                                                       | n/a        |
| 168.39  | Unknown                                                                 | GO:0016203, GO:0007015, GO:0017166, GO:0005925, GO:0007605, GO:0050954, GO:0007155, GO:0016477                                                                                                                                                                                                                                                                                                             | CG18408-PX |
| 91159.1 | Putative inorganic phosphate cotransporter                              | GO:0048190, GO:0015293, GO:0016021, GO:0006814, GO:0005316, GO:0015114, GO:0005886, GO:0001666, GO:0055085                                                                                                                                                                                                                                                                                                 | CG15095-PB |
| 640.3   | Unknown                                                                 | None                                                                                                                                                                                                                                                                                                                                                                                                       | n/a        |
| 750.15  | N-glycosylase/DNA lyase                                                 | GO:0009314, GO:0033158, GO:0009416, GO:0016607, GO:0032355, GO:0005634, GO:0033683, GO:0005739, GO:0005654, GO:0043066, GO:0016363, GO:0006284, GO:0006285, GO:0006281, GO:0006289, GO:0003906, GO:0045471, GO:0034039, GO:0002526, GO:0071276, GO:0006979, GO:0043234, GO:0006974, GO:0045007, GO:0007568, GO:0051593, GO:0004519, GO:0042493, GO:0045008, GO:0008534, GO:0006355, GO:1901291, GO:0003684 | CG1795-PA  |
| 142.48  | Unknown                                                                 | GO:0005575, GO:0046331, GO:0003674                                                                                                                                                                                                                                                                                                                                                                         | CG43740-PC |
| 11455.1 | Unknown                                                                 | GO:0015629, GO:0007498, GO:0060361, GO:0008335, GO:0007303, GO:0030018, GO:0005737, GO:0040023, GO:0005635, GO:0007519, GO:0003779, GO:0006366, GO:0048471, GO:0016477, GO:0031965, GO:0008305, GO:0005884, GO:0007523, GO:0051640, GO:0040011, GO:0007015, GO:0007010, GO:0008092, GO:0003725                                                                                                             | CG42768-PL |
| 3306.16 | 28S ribosomal protein S28, mitochondrial                                | GO:0070126, GO:0006996, GO:0070124, GO:0070125, GO:0044822, GO:0005739, GO:0006412, GO:0003735, GO:0005743, GO:0005763, GO:0032543                                                                                                                                                                                                                                                                         | CG5497-PA  |
| 4324.1  | ABC transporter G family member 23                                      | GO:0043190, GO:0042626, GO:0005215, GO:0016021, GO:0006810, GO:0016887, GO:0022008, GO:0005524                                                                                                                                                                                                                                                                                                             | CG11147-PA |
| 1055.7  | Putative polypeptide N-acetylgalactosaminyltransferase 9                | GO:0005794, GO:0031985, GO:0006493, GO:0032504, GO:0016021, GO:0004653, GO:0030246, GO:0000139,                                                                                                                                                                                                                                                                                                            | CG30463-PA |

|          |                                                                     |                                                                                                                                                                                                                                                                                                                                                                                                                                                                                                                                                                                                                                    |            |
|----------|---------------------------------------------------------------------|------------------------------------------------------------------------------------------------------------------------------------------------------------------------------------------------------------------------------------------------------------------------------------------------------------------------------------------------------------------------------------------------------------------------------------------------------------------------------------------------------------------------------------------------------------------------------------------------------------------------------------|------------|
|          |                                                                     | GO:0046872, GO:0005829                                                                                                                                                                                                                                                                                                                                                                                                                                                                                                                                                                                                             |            |
| 437.2    | Indole-3-acetaldehyde oxidase                                       | GO:0004031, GO:0050660, GO:0016614, GO:0008762, GO:0043546, GO:0005829, GO:0051537, GO:0009851, GO:0009688, GO:0004855, GO:0004854, GO:0005506, GO:0009055, GO:0050302, GO:0055114, GO:0016491                                                                                                                                                                                                                                                                                                                                                                                                                                     | CG6045-PA  |
| 437.3    | Xanthine dehydrogenase                                              | GO:0050660, GO:0016614, GO:0008762, GO:0051537, GO:0004854, GO:0005506, GO:0055114, GO:0009055                                                                                                                                                                                                                                                                                                                                                                                                                                                                                                                                     | CG6045-PA  |
| 729.3    | Unknown                                                             | None                                                                                                                                                                                                                                                                                                                                                                                                                                                                                                                                                                                                                               | n/a        |
| 1103.30  | Unknown                                                             | None                                                                                                                                                                                                                                                                                                                                                                                                                                                                                                                                                                                                                               | n/a        |
| 12023.1  | Unknown                                                             | None                                                                                                                                                                                                                                                                                                                                                                                                                                                                                                                                                                                                                               | n/a        |
| 105422.1 | Unknown                                                             | None                                                                                                                                                                                                                                                                                                                                                                                                                                                                                                                                                                                                                               | n/a        |
| 5025.4   | tRNA pseudouridine synthase A, mitochondrial                        | GO:0005730, GO:0004730, GO:0031119, GO:0044822, GO:0009982, GO:0030374, GO:0000790, GO:0005739, GO:0045944, GO:0003723, GO:0005667, GO:0009451, GO:0001522                                                                                                                                                                                                                                                                                                                                                                                                                                                                         | CG4159-PB  |
| 356.50   | Zinc finger protein 714                                             | GO:0005634, GO:0006355, GO:0006351, GO:0003676, GO:0003677, GO:0046872                                                                                                                                                                                                                                                                                                                                                                                                                                                                                                                                                             | CG3407-PA  |
| 2408.4   | Probable uridine nucleosidase 2                                     | GO:0005737, GO:0045437                                                                                                                                                                                                                                                                                                                                                                                                                                                                                                                                                                                                             | CG11158-PA |
| 637.31   | Unknown                                                             | None                                                                                                                                                                                                                                                                                                                                                                                                                                                                                                                                                                                                                               | n/a        |
| 21398.1  | Bone morphogenetic protein receptor type-1B                         | GO:0048100, GO:0042078, GO:0008101, GO:0006468, GO:0048636, GO:0030509, GO:0045887, GO:0001763, GO:0007304, GO:0005025, GO:0001745, GO:0007274, GO:0050431, GO:0005771, GO:0007476, GO:0030707, GO:0004675, GO:0004672, GO:0002063, GO:0007181, GO:0005524, GO:0045705, GO:0060350, GO:0035215, GO:1902731, GO:0007424, GO:0007488, GO:0061036, GO:0045595, GO:0046872, GO:0090254, GO:0005886, GO:0030166, GO:0044214, GO:0007179, GO:0007507, GO:0016477, GO:0009953, GO:0046845, GO:0022407, GO:0045927, GO:0007448, GO:0010629, GO:0007391, GO:0006357, GO:0005515, GO:0004702, GO:0061327, GO:0045570, GO:0005769, GO:0030718 | CG14026-PC |
| 356.3    | Zinc finger and SCAN domain-containing protein 22                   | GO:0003700, GO:0005634, GO:0006351, GO:0003676, GO:0003677, GO:0046872                                                                                                                                                                                                                                                                                                                                                                                                                                                                                                                                                             | CG15269-PA |
| 577.22   | Unknown                                                             | None                                                                                                                                                                                                                                                                                                                                                                                                                                                                                                                                                                                                                               | n/a        |
| 2037.2   | Protein ABHD18                                                      | GO:0005576                                                                                                                                                                                                                                                                                                                                                                                                                                                                                                                                                                                                                         | CG32112-PB |
| 631.14   | Transcription factor A, mitochondrial                               | GO:0001077, GO:0042645, GO:0007005, GO:0005813, GO:0005634, GO:0005739, GO:0006264, GO:0010467, GO:0006261, GO:0006366, GO:0005759, GO:0070363, GO:0005694, GO:0033108, GO:0044822, GO:0008301, GO:0045893, GO:0006979, GO:0006996, GO:0006338, GO:0003700, GO:0005829, GO:0006355, GO:0006356, GO:0045944, GO:0006390, GO:0006391, GO:0000978, GO:0003682                                                                                                                                                                                                                                                                         | CG4217-PB  |
| 2836.4   | Zinc finger CCHC domain-containing protein 9                        | GO:0044822, GO:0010923, GO:0008270, GO:0003676                                                                                                                                                                                                                                                                                                                                                                                                                                                                                                                                                                                     | n/a        |
| 1497.2   | Ubiquinone biosynthesis O-methyltransferase, mitochondrial          | GO:0008689, GO:0042060, GO:0004395, GO:0031314, GO:0006071, GO:0008425, GO:0006744, GO:0006743                                                                                                                                                                                                                                                                                                                                                                                                                                                                                                                                     | CG9249-PA  |
| 978.1    | LysM and putative peptidoglycan-binding domain-containing protein 3 | GO:0016021                                                                                                                                                                                                                                                                                                                                                                                                                                                                                                                                                                                                                         | CG17985-PA |
| 1074.19  | EKC/KEOPS complex subunit LAGE3                                     | GO:0005634, GO:0008033                                                                                                                                                                                                                                                                                                                                                                                                                                                                                                                                                                                                             | CG42498-PA |
| 1048.2   | Unknown                                                             | GO:0005125, GO:0006954, GO:0005576                                                                                                                                                                                                                                                                                                                                                                                                                                                                                                                                                                                                 | n/a        |
| 3628.9   | Unknown                                                             | None                                                                                                                                                                                                                                                                                                                                                                                                                                                                                                                                                                                                                               | CG4042-PA  |
| 336.6    | Unknown                                                             | GO:0022008                                                                                                                                                                                                                                                                                                                                                                                                                                                                                                                                                                                                                         | CG31344-PA |
| 282.3    | Unknown                                                             | None                                                                                                                                                                                                                                                                                                                                                                                                                                                                                                                                                                                                                               | n/a        |
| 2399.51  | Unknown                                                             | None                                                                                                                                                                                                                                                                                                                                                                                                                                                                                                                                                                                                                               | n/a        |

|         |                                           |                                                                                                                                                                                                                                                                                                                                                                                                                                                                                                                                                            |            |
|---------|-------------------------------------------|------------------------------------------------------------------------------------------------------------------------------------------------------------------------------------------------------------------------------------------------------------------------------------------------------------------------------------------------------------------------------------------------------------------------------------------------------------------------------------------------------------------------------------------------------------|------------|
| 3659.1  | Unknown                                   | None                                                                                                                                                                                                                                                                                                                                                                                                                                                                                                                                                       | n/a        |
| 2570.1  | Unknown                                   | None                                                                                                                                                                                                                                                                                                                                                                                                                                                                                                                                                       | n/a        |
| 4258.3  | Larval/pupal rigid cuticle protein 66     | GO:0005214, GO:0040003, GO:0031012, GO:0042302, GO:0008010                                                                                                                                                                                                                                                                                                                                                                                                                                                                                                 | CG34461-PA |
| 1384.9  | GTPase Era, mitochondrial                 | GO:0043024, GO:0019843, GO:0000028, GO:0005743, GO:0005759, GO:0005875, GO:0005525                                                                                                                                                                                                                                                                                                                                                                                                                                                                         | CG7488-PA  |
| 5219.11 | Facilitated trehalose transporter Tret1   | GO:0005355, GO:0015574, GO:0015771, GO:0016021, GO:0005886, GO:0055085                                                                                                                                                                                                                                                                                                                                                                                                                                                                                     | CG4797-PB  |
| 20369.1 | Ribonuclease H2 subunit C                 | GO:0005634, GO:0032299, GO:0005575, GO:0008150, GO:0006401, GO:0003674                                                                                                                                                                                                                                                                                                                                                                                                                                                                                     | CG30105-PA |
| 9212.1  | Unknown                                   | None                                                                                                                                                                                                                                                                                                                                                                                                                                                                                                                                                       | n/a        |
| 4796.2  | Fatty acid synthase                       | GO:0006633, GO:0047451, GO:0016295, GO:0005835, GO:0004320, GO:0016296, GO:0016788, GO:0004317, GO:0004312, GO:0004313, GO:0047117, GO:0004316, GO:0008270, GO:0004314, GO:0004315, GO:0004319, GO:0055114, GO:0016491                                                                                                                                                                                                                                                                                                                                     | CG17374-PC |
| 837.8   | Talin-1                                   | GO:0005200, GO:0006909, GO:0015629, GO:0060439, GO:0007596, GO:0035160, GO:0006928, GO:0007044, GO:0007043, GO:0007411, GO:0007298, GO:0005925, GO:0005737, GO:0044267, GO:0001726, GO:0070062, GO:0007430, GO:0002576, GO:0007475, GO:0003779, GO:0030168, GO:0016203, GO:0005178, GO:0016032, GO:0006936, GO:0009986, GO:0005158, GO:0036498, GO:0008360, GO:0045892, GO:0030274, GO:0005886, GO:0007155, GO:0032587, GO:0007526, GO:0007016, GO:0005911, GO:0005815, GO:0030968, GO:0005829, GO:0030866, GO:0005576, GO:0017166, GO:0005515, GO:0070527 | CG6831-PB  |
| 644.5   | Proteasome subunit beta type-2            | GO:0005737, GO:0051603, GO:0004175, GO:0005839, GO:0032504, GO:0043161, GO:0010243, GO:0009987, GO:0010499, GO:0004298, GO:0006974, GO:0016020, GO:0005654, GO:0014070, GO:0070062                                                                                                                                                                                                                                                                                                                                                                         | CG17331-PB |
| 22557.1 | Serine/threonine-protein phosphatase BSU1 | GO:0005737, GO:0016787, GO:0009742, GO:0000278, GO:0016311, GO:0006470, GO:0005634, GO:0000082, GO:0004722, GO:0046872, GO:0032880                                                                                                                                                                                                                                                                                                                                                                                                                         | CG12217-PD |
| 8113.1  | Lebocin-4                                 | GO:0045087, GO:0005576, GO:0042742                                                                                                                                                                                                                                                                                                                                                                                                                                                                                                                         | n/a        |

**Table S5. Enriched GO terms associated with proteins in Table S4**

| GO term    | P-value     | Q-value     | Definition                                                 | Related proteins                                             |
|------------|-------------|-------------|------------------------------------------------------------|--------------------------------------------------------------|
| GO:0005835 | 1.92E-06    | 0.002176833 | fatty acid synthase complex                                | 1252.11, 48208.1, 1252.12, 4796.2, 1252.10                   |
| GO:0004312 | 7.00E-06    | 0.003965224 | fatty acid synthase activity                               | 1252.11, 48208.1, 1252.12, 4796.2, 1252.10                   |
| GO:0006743 | 3.42E-05    | 0.012902047 | ubiquinone metabolic process                               | 1497.2, 1497.3, 35367.1                                      |
| GO:0006633 | 0.000114024 | 0.032297378 | fatty acid biosynthetic process                            | 1516.11, 1252.11, 48208.1, 50480.1, 1252.12, 4796.2, 1252.10 |
| GO:0016788 | 0.000187465 | 0.042479623 | hydrolase activity, acting on ester bonds                  | 1252.11, 48208.1, 1252.12, 4796.2, 1252.10, 3772.2           |
| GO:0004395 | 0.000441406 | 0.083352155 | hexaprenyldihydroxybenzoate methyltransferase activity     | 1497.2, 1497.3                                               |
| GO:0060086 | 0.000441406 | 0.071444704 | circadian temperature homeostasis                          | 4948.6, 918.56                                               |
| GO:0008689 | 0.000441406 | 0.062514116 | 3-demethylubiquinone-9 3-O-methyltransferase activity      | 1497.2, 1497.3                                               |
| GO:0008425 | 0.000983394 | 0.123798419 | 2-polyprenyl-6-methoxy-1, 4-benzoquinone methyltransferase | 1497.2, 1497.3                                               |



|            |             |             | activity                                                             |                                                                                                                                                                     |
|------------|-------------|-------------|----------------------------------------------------------------------|---------------------------------------------------------------------------------------------------------------------------------------------------------------------|
| GO:2000678 | 0.000983394 | 0.111418577 | negative regulation of transcription regulatory region DNA binding   | 4948.6, 918.56                                                                                                                                                      |
| GO:0047451 | 0.001061976 | 0.109383485 | 3-hydroxyoctanoyl-[acyl-carrier-protein] dehydratase activity        | 1252.10, 1252.12, 4796.2                                                                                                                                            |
| GO:0047117 | 0.001061976 | 0.100268195 | enoyl-[acyl-carrier-protein] reductase (NADPH, A-specific) activity  | 1252.10, 1252.12, 4796.2                                                                                                                                            |
| GO:0016296 | 0.001311891 | 0.114336387 | palmitoyl-[acyl-carrier-protein] hydrolase activity                  | 1252.10, 1252.12, 4796.2                                                                                                                                            |
| GO:0004317 | 0.001311891 | 0.106169502 | 3-hydroxypalmitoyl-[acyl-carrier-protein] dehydratase activity       | 1252.10, 1252.12, 4796.2                                                                                                                                            |
| GO:0016295 | 0.001311891 | 0.099091536 | myristoyl-[acyl-carrier-protein] hydrolase activity                  | 1252.10, 1252.12, 4796.2                                                                                                                                            |
| GO:0004320 | 0.001311891 | 0.092898315 | oleoyl-[acyl-carrier-protein] hydrolase activity                     | 1252.10, 1252.12, 4796.2                                                                                                                                            |
| GO:0004313 | 0.001311891 | 0.087433708 | [acyl-carrier-protein] S-acetyltransferase activity                  | 1252.10, 1252.12, 4796.2                                                                                                                                            |
| GO:0004319 | 0.001311891 | 0.08257628  | enoyl-[acyl-carrier-protein] reductase (NADPH, B-specific) activity  | 1252.10, 1252.12, 4796.2                                                                                                                                            |
| GO:0004314 | 0.001595954 | 0.095169233 | [acyl-carrier-protein] S-malonyltransferase activity                 | 1252.10, 1252.12, 4796.2                                                                                                                                            |
| GO:0004315 | 0.001595954 | 0.090410772 | 3-oxoacyl-[acyl-carrier-protein] synthase activity                   | 1252.10, 1252.12, 4796.2                                                                                                                                            |
| GO:0006744 | 0.001595954 | 0.086105497 | ubiquinone biosynthetic process                                      | 1497.2, 1497.3, 35367.1                                                                                                                                             |
| GO:0004316 | 0.002668593 | 0.137432528 | 3-oxoacyl-[acyl-carrier-protein] reductase (NADPH) activity          | 1252.10, 1252.12, 4796.2                                                                                                                                            |
| GO:0004730 | 0.002678271 | 0.131933949 | pseudouridylate synthase activity                                    | 5025.4, 3152.7                                                                                                                                                      |
| GO:0055114 | 0.003912765 | 0.184715097 | oxidation-reduction process                                          | 437.3, 1252.12, 1516.11, 9752.3, 1252.11, 48208.1, 50480.1, 259.11, 1252.10, 437.2, 5520.1, 4796.2, 3306.18, 496.4, 13513.1, 1730.2                                 |
| GO:0031314 | 0.005147073 | 0.233265328 | extrinsic component of mitochondrial inner membrane                  | 1497.2, 1497.3                                                                                                                                                      |
| GO:0004854 | 0.005147073 | 0.224293585 | xanthine dehydrogenase activity                                      | 437.2, 437.3                                                                                                                                                        |
| GO:0048536 | 0.005147073 | 0.215986415 | spleen development                                                   | 363.28, 5755.1                                                                                                                                                      |
| GO:0048512 | 0.006656972 | 0.269369628 | circadian behavior                                                   | 4948.6, 918.56                                                                                                                                                      |
| GO:0042587 | 0.006656972 | 0.26008102  | glycogen granule                                                     | 1252.10, 1252.12                                                                                                                                                    |
| GO:0030879 | 0.008342947 | 0.315085311 | mammary gland development                                            | 1252.10, 1252.12                                                                                                                                                    |
| GO:0007620 | 0.010199464 | 0.372773959 | copulation                                                           | 4948.6, 918.56                                                                                                                                                      |
| GO:0006071 | 0.010199464 | 0.361124773 | glycerol metabolic process                                           | 1497.2, 1497.3                                                                                                                                                      |
| GO:0090254 | 0.010199464 | 0.350181598 | cell elongation involved in imaginal disc-derived wing morphogenesis | 21398.1, 91807.1                                                                                                                                                    |
| GO:0017166 | 0.010199464 | 0.339882139 | vinculin binding                                                     | 168.39, 837.8                                                                                                                                                       |
| GO:0004017 | 0.010199464 | 0.330171221 | adenylate kinase activity                                            | 341.2, 2028.21                                                                                                                                                      |
| GO:0016081 | 0.011830946 | 0.372346175 | synaptic vesicle docking                                             | 209.1, 2727.6, 784.5                                                                                                                                                |
| GO:0005739 | 0.011931422 | 0.365359501 | mitochondrion                                                        | 4482.3, 6749.3, 6749.2, 35367.1, 5826.4, 3306.16, 5520.1, 1252.10, 1252.12, 631.14, 106.16, 5025.4, 581.7, 185.8, 1079.11, 750.15, 37761.1, 729.9, 139069.8, 2247.5 |
| GO:0071353 | 0.012221113 | 0.364382132 | cellular response to interleukin-4                                   | 1252.10, 1252.12                                                                                                                                                    |
| GO:0006767 | 0.012221113 | 0.355039    | water-soluble vitamin metabolic process                              | 1252.10, 581.7                                                                                                                                                      |
| GO:0006084 | 0.012221113 | 0.346163025 | acetyl-CoA metabolic process                                         | 1252.10, 1252.12                                                                                                                                                    |
| GO:0000062 | 0.014402607 | 0.398003742 | fatty-acyl-CoA binding                                               | 5520.1, 4482.3                                                                                                                                                      |
| GO:0016491 | 0.014806594 | 0.399425511 | oxidoreductase activity                                              | 1252.11, 48208.1, 1252.12, 437.2, 4796.2, 1252.10, 13513.1, 1730.2                                                                                                  |

**Table S6. Genes and mutations that may be related to the phenotype of “extensive white scaling on hindwings”**

| gene name | function                                            | fixed mutation | number of non-gap samples in the validation set |
|-----------|-----------------------------------------------------|----------------|-------------------------------------------------|
| 437.3     | Xanthine dehydrogenase                              | Q602H          | 5                                               |
| 437.3     | Xanthine dehydrogenase                              | I619V          | 4                                               |
| 437.3     | Xanthine dehydrogenase                              | S632C          | 4                                               |
| 437.3     | Xanthine dehydrogenase                              | P699A          | 4                                               |
| 437.3     | Xanthine dehydrogenase                              | V736L          | 4                                               |
| 545.6     | Midasin                                             | V4038I         | 4                                               |
| 545.6     | Midasin                                             | T1911I         | 3                                               |
| 545.6     | Midasin                                             | T1912I         | 3                                               |
| 545.6     | Midasin                                             | S2757A         | 2                                               |
| 105.2     | Zinc finger Ran-binding domain-containing protein 2 | I736V          | 5                                               |
| 105.2     | Zinc finger Ran-binding domain-containing protein 2 | R929K          | 5                                               |
| 105.2     | Zinc finger Ran-binding domain-containing protein 2 | T776A          | 5                                               |
| 1537.8    | Alpha-xylosidase                                    | N755S          | 5                                               |
| 1537.8    | Alpha-xylosidase                                    | D779N          | 5                                               |
| 1537.8    | Alpha-xylosidase                                    | D918E          | 5                                               |
| 2719.2    | WD repeat-containing protein 60                     | G787S          | 3                                               |
| 2719.2    | WD repeat-containing protein 60                     | R670K          | 4                                               |
| 2719.2    | WD repeat-containing protein 60                     | K444R          | 1                                               |

**Table S7. Abbreviations of collections we used specimens from**

| Abbreviation    | Collection                                                                       |
|-----------------|----------------------------------------------------------------------------------|
| AMNH            | American Museum of Natural History, New York, NY, USA                            |
| Bernard Hermier | Private collection of Bernard Hermier, Cayenne, French Guiana, France            |
| Bill Dempwolf   | Private collection of William R. Dempwolf, Austin, TX, USA                       |
| CAS             | California Academy of Sciences, San Francisco, CA, USA                           |
| CMNH            | Carnegie Museum of Natural History, Pittsburgh, PA, USA                          |
| Ernst Brockmann | Private collection of Ernst Brockmann, Lich, Germany                             |
| FMNH            | The Field Museum of Natural History, Chicago, IL, USA                            |
| James Scott     | Private collection of James A. Scott, Lakewood, CO, USA                          |
| Jim Brock       | Private collection of Jim P. Brock, Tucson, AZ, USA                              |
| John MacDonald  | Private collection of John R. MacDonald, Starkville, MS, USA                     |
| LACM            | Los Angeles County Museum of Natural History, Los Angeles, CA                    |
| MGCL            | McGuire Center for Lepidoptera and Biodiversity, Gainesville, FL, USA            |
| TAMU            | Texas A&M University Insect Collection, College Station, TX, USA                 |
| TMMC            | University of Texas Biodiversity Center, Austin, TX, USA                         |
| USNM            | National Museum of Natural History, Smithsonian Institution, Washington, DC, USA |
| ZMHB            | Museum für Naturkunde, Berlin, Germany                                           |

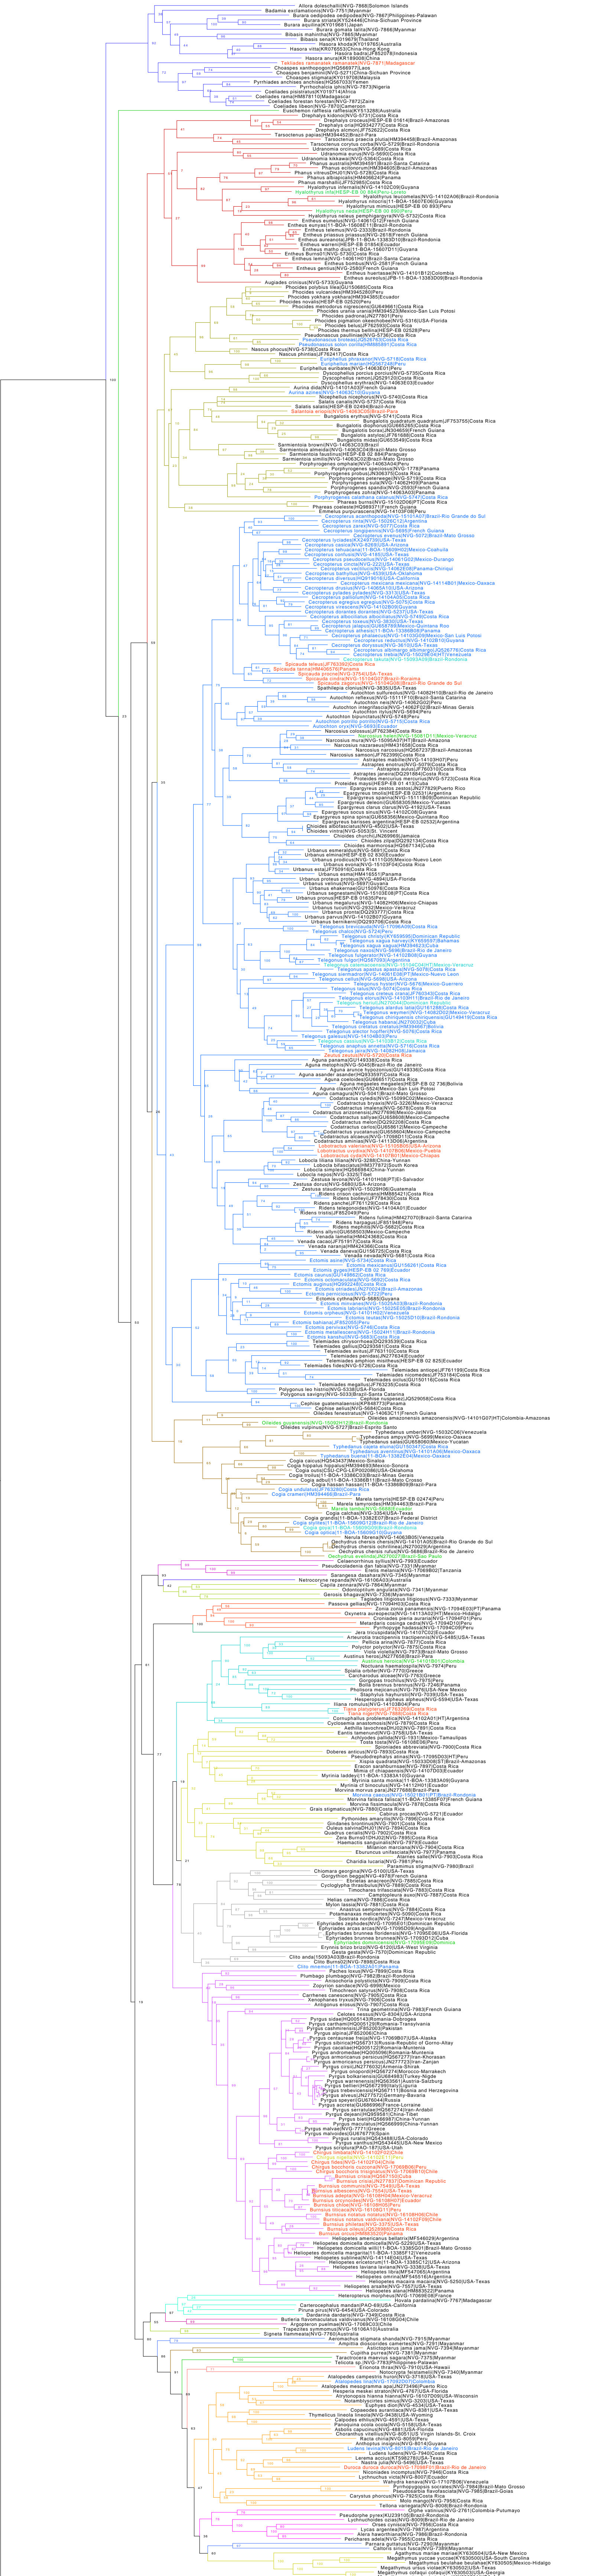

Pterourus glaucus[KR22739]USA-Texas

**Figure S1. Phylogenetic tree of Hesperidae based on coding regions from mitogenome.** All coding regions are used for 250 specimens with genomic data we obtained (10633+/-674 positions, see Table S1 for specimen data). For the remaining 290 specimens, COI barcode region is used (654 positions). The tree is constructed by RAxML (see Methods in SI Appendix for details). Bootstrap support values are shown by each node. Branches leading to species from the same tribe are colored in the same color. Taxon name|DNA sample identifier|general locality are given for each specimen. Those colored red are species placed in a new genus described in this work, blue are taxa placed in a different genus than previously (new genus-species combinations), green are taxa formerly treated as subspecies, which are elevated to species in this work. Cyan is both blue and green; yellow is both red and green. Sample identifiers without dashes and spaces are GenBank accessions, those with spaces or prefix CSU-CPG- are BOLD database sample IDs, those with dashes (prefix: NVG-, PAO-, 11-BOA-, and JPB-11-BOA-) are obtained in this work and specimen data for them are given in Table S2.

## SI: Diagnostic nucleotide characters mapped to the reference genome of *Cecropterus lyciades*

>aly671.27:935C(not\_T)

ATGCGCGCGGACCGCGCCGCGCTCTACGCGTGGCTCGTCTGCTGCGCAGCCGCGCTCTCCACGCACAAATACAGCAC  
GCGCGTCGTGCGCACCAAGTACGGGCCGCTGCGCGGGATCGTTCGTCATTTCGCACCCTCAAGTTGAGGCCTACCTCG  
GCGTTCCGTACGCTACGCCTCCTCTGGGAAGTCTTAGATATATGCCACCGGTGACGCCATCGCAGTGGCGCATGCCG  
CGGCTGGCGGACACGCCGGGCCCCGCGTGCCTCGCAGGTGCCGCCCGCCGCTCGCCGCCTGACGACGCGCTGCTCCT  
GCACCCGCGCGCTCGCATCCGACAGCTCGAACGCCTGTTGCCAATGCTCACAAACCAGAGCGAAGACTGTCTCTACG  
TTAACCTTTATGTACCTGTTAACGGCGGAGAACGAAGGCGGGTTGCCCTGCTTGGTGTTCGTGCACGGCGAGTCCAC  
GAGTGGAGCTCGGGCAACGCGTACGATGGCACCACGCTCGCTGCGCATGGGAACATCATCGTAGTCACTATCAACTT  
TAGATTAGGTGTTCTCGGTTTTTTAAAGACTGGTGCTAAGGGTTCAGCGCAGGGTAACTTCGGGCTTATGGATTTGG  
TGGCGGGTTTGCACTGGTTGCGAGAGAATCTTCGGCCCTTTGGGGCAATCCTGAGAAAGTCAAGCTCATGGGTAC  
GGGACGGGAGCAGCCCTGGCCAACCTTCCTTGCAAGTGTCTCCTGTTGCAAGAGAATCTGAGGCGCGTCACTTTGTT  
AAGCGGATCGGGTCTAAGCTCATGGGCTTTGCAAGGGAACCACTGACAGTAAAAAGAAAGGTAGCGGAGCAGACCG  
GGTGCCACGGGATTTGTTAGAAGATGACTTAGCACCCTGCTTGCCTAACAAAGCCGCTTGTGAACTGCTCGCCGTG  
CGGATCGGAAACGCCGCGATTCTGCCTGGATTTGCACCCTTCGTTGATGGCACCGTCAATAGTCACTCCGTCTTCGGC  
ACCGCCGCCACGGATAGTTTCGCGGTTGGGCGCGGGCGCCCGCCGCTGGCGTCCGCGCGGGACACGAGCTCGCAG  
ACTTCTCGCATCGGGAAGTCTCTTTGGCCTTACTACAACCTGAATCTTACTTGAATTCAATGCTCAAGACTTGGAG  
TTCGGTTTTCAATGAGAGTTCGACGGGATCGCATTTCGCGCACCTTCGTCGCAACGCCTATTACTATCATCTCAACGA  
AATTTATCCACTTTGAAGAACGAATACACCGATTGGGACAAGCCAGTACAGAACCCTCGCTCAGCGTGCCTGACGCCA  
CTCTCGAGGTCTAAGTGACGGGCGGACAGCAGCTCCACTTATACGACTCGGCTACCTGCACGCTCTGCGCGGGCGGA  
ACCACCTACTTCACGCATTTCCACCACCTTTGCAAGATAAGGATTATCCGCAGCGGCCGGGATCAGTCCATGGGGA  
AGAGTTGCCGTATTACTTAGGAGTCCCGCTGTCCACGACGCACCACCAACAGAATTTACGTTACAAGAACAACGAG  
TATCCAAGCTTTGTATGCATTACATCTCTAATTTTGTCCGACATGGGAACCCTAACGATCCGAGTGCAGCCCTCCT  
CCAAGTCCAATGTTGGGCGACACGCCACACACCAGTCCGGACCAGACGCCGCTACTGGGACACGTATGATACTATCAA  
TCAGCTCTACATGGAAATTAGCGGGAAGCCGGAAATGAGGAGTCACTACCGCGGCCACAAGATGTGCTGTGGCTGT  
CCCTCATCCCGCAGTTGCACCGGCCGGGCCCCGATTTGCCCGATGCGGCCATGAGACACCATCATTTTCAGGATGAC  
AACCGCAATTATTATGAAGGTGTGGTGCAGCCGCGAGTCTAGCTCGCGTGCACAGTGCACACGTGGCGGGCACAGC  
GGGCGGTGGCGCGCGGCCACACCGGCGCCGCTTCCTCACCTGCGCCCGCCCGCGCCCGCCCTCCACCAGT  
GCCACCCAACCGCTCTGCGACGCCGCTCCAGAACGACGACGCCTTGTCCGTCGCTCGCTCGCTCCTCTCACTACCAG  
TCATACACCGCGCTTGACGGTTACTATCGCTGTCGGCTGCTTCTGCTGCTCCTCAACGTTCTCATATTCGCGG  
CATATACCACCAGCGAGGCTCGCGTCCGCGCCGTCAAGGACGATCTCGCTGAGGCTGGAAGCTCGTCTCGTCTG  
ATAATTACGATGGTAAATTAGATTATGAGGTGCGCGCTTTGACGAAAAGGCTTCGGTTTTGATTGTAAGTCAGCG  
CATGTTCCGCGCGGATCCGGTTCGAAGTTGCACTTGAGGACGTTATCCGATTGTGGTGAACCAACGTTCCGGTGA  
TAGTTGCTACGATGAGAAACACAGAGCGGCGGGAGTTGTTACCAGACGTGAGTGTGCGGAGTGTATAGAGGCAG  
GTAGTGTGTGTATCGATACTCAGAAACCTGATATTCAGAAAGTGGAGGGCGGATGCCCGACCCTGTGGGTAGG  
ACGAGCACGTTTCGAGCCTCGCGTGTGGACAGTTCTACGCAGGTAAAGTTCCGGTCCGGGGCCAGATTGCGTGGATGC  
TGCAACTGAGTCTAATGGCGATTACAGAGTCGATGACCGGGGAGGATCTGGAATCCTACGTGTTCTCCTGCCCCCA  
CCACACCCGCTCCTCCAGGGATCATGAAGAAAAGAGTGCAATACAAGAAATATCTGTATGA

>aly144.41:G201C

CCAATTTGTAAGAATTAACCTCCATTTCTGTAACATCAACAATAGCTGCCTGCACATCCATGTTTGTATTCTAGGA  
CATTCCATTAGGTGTTTACTGAACTTCAGTATAGTCTCCTGGTGCAGGACTCAGTTTACTACACATAGCGTTCTT  
AATGTCCACTTCCTTAGAGTTAACACAAACAAAGAAAAGAAGCAGTATGATGCAGCCAAGTACACATCGCCATCACTAT  
CAGGTTCTACAGTTCATTTTCAAATTTGAACTCCGGATACTTCTCTGTTATAAACTCTTGGATAGTATGGGCATCG  
AGTATAGAAGATTGTTCAAATTTAAATTTTCTCGCAAATGCGATATAATCGCAAGAAGAGATTCCAAGTTCACGGG  
TAGGCACCTTTCTATTTGTTTCGTTAAAGTAACAATTAATATAGCTTTTCTACTTTTTAAATTCGTCTTAGTCACTCC  
TCCTGTAGGTAGGTCCGATCGAATCTCTCTGCATCCAGTGCAGCTTGTAAAGCGCCGGACCTCGCTGTGGAAGGAGCG  
CAGTGCCGGTGGAGTCTCCGCAACCATCACTTGCATTCCTCACTGGCTCTTTTACAGGTGTGCTTTGACCACAGGCCT  
CTTAGTCTTGTAAGTTTCCCTCTCATATTTGGACATCCTCAAGTCTCCTGGGTGCTCACCACCTTAGCTCCATCT  
GCTCTAAGTCTTTTACCAGTTTACTGGTGTGCTTACCTCCCATGACGTCCCTGAGACTCTTTGTCTGACCTCCA  
TATTGTGATATTTGTGATTTGAGCTCCACTATCTCCAACCTGTAAGTCTTCTTTTAAAGAGTTGTGTTGCAA

CGAATGAATACTCGCATCTGGATCATCACACTCCAGCAAGCTAGAAATTGATCCCATTGAGGTGGTTGTGTTGTCGTA  
ACTCGTCAACCAACTCCCCTAGCGACTGCGTTTGTGCGCGTTCTACATCCAACCTCTTCAGCCAGTTGACTTGATCTG  
AGTGACTCTTGTTGACTGATCACTAATAACTTGTCTGCTCTGATTTCAATTGATTGAGCTGCAATGATTGCACCAG  
ACGTTCTAATTCAACAATCTTCGCTCTTTCTTCTCCAATTGTACCTCTATTACATTAGCACACACCTCACTGCAAG  
TTGCTGTAACAGTTTCATCTGTTGTTCAAGTTCATAATCTTTGCTCTTTGCTCGCTCCTTTTCTTCTATTTCTACAT  
CCACGGAATTTTTCAACTTAGTGATAATATTCTCGTTGTCCGAAATAATTTTTCGTCAATGTTTGTGTTTTCTTCTTCA  
GCTTTTCGAGTTACATCACATACCAAGTCTTTAACAATTGCATTTGTTGTTCCAAATCCACAATCTTTTCTTTATG  
GACTTCTTTTCTTCTATTTCCAGTTTCATACGATGTTCCACATTGGAGATAGTGCTTTCATTATCAGAGATAATTG  
TCTTTAACAATAGTTTTTCTCTGTTTTCTAGTTAAATCACAAAGTTCCTCCTGTAATAGTTGAATTTGTTCT  
TCATATTTCCACTATCTTTACTCTTTGTACTTCTTTTCTTTTATTCTTACATTACGGAATGTTTCAAGTCCATTAT  
AGTACTTTGTTTATTTGAAATAATAGTCGTTAATCTTTGTTTATCTCTTCAGCTTTCTTTGTTTACATTACTGATT  
GATCCTGCAACAATTGCAACTGTTGTTCAAGTTCGCAATCTTTGAAATTTTATTTTCTTTTCTTTCAGTTTCTACA  
TTGAGGGAATTTTTCAAATTCATGATGACCTTTTCTGTTATCTGAAATAATTATTGACAATGCTTGTGTTTTCTCTTC  
AGTTTTTCTCGCTAAATCACTAAATTGGTCTGCAACAATATCAACTGTTGTTCAAGTTCGCAATATTTGCAATTT  
TATTTTTCTTTTCTTCTGTTTTCTACATTCAAGCAATGTTTTAAATTCGCGATAGTGCTTTTCGTTATCTGAAATAATT  
TTTGTCAATGCTTGTGTTTTCTCATCAGTTTTTATTGTTAAATCACTAAATTGGTCTGTAATAGTAGCATTGACG  
TTCAAGTTCACAACCTTTGCTGTCTGTATTTCTTTTGTCTGTTTTCTACCTTCACGCATTGTTTTAAATCCAATA  
AAGTTCCTTTCATTTTCGGAATAAATTTCTTCAACGCTCGTTTATCGTCTGCGCTTTGTTTGTAAATCACTATAT  
TGACCCTGTAGCAACAGAATTTGTTGTTCTAGTTCCATAACCTTTGCTATGTGTTTTCTTCTTTTCTTCTGCTCTAC  
ATTCATGCTATCTTTCAAATTTGGTGATAATACTTTGTTTTCTGATATAAATTTGGTAAATGTTTGTGTTTTCTCTT  
CAGCTTTTCTTGATAATTCATGGTGTGATCCTGCAACAATTGCGTTTTGTTGTTTAAAGTTCACGCATTTTGCTTTT  
TCTGCTTCTTTTCTTCTATTTCTACATTATGATGATGTTTCAAGTCCGTAATAGTATTTCCATATCCGAAATAAT  
TATTTTTAATGCTTGTGTTTTCTCTCCAGTTTTTATTGTTAGATCAATTAATTGTTCCGCAACAGTTGCAGTCTGTT  
GTCCAAGTTCATGATTTTTTCTTTTCTTTCAGTTTCTAGATTAATGCATTGTTTCAAGTTAGCGATAGTAAGT  
TCATTATCAGAGATGGCTTCTGTCAATGCTCGTTTTTCTGTCGTCAGTTTTTCTGTTAACTCACTGAATTTATCCTG  
TAAACATTGCAAACGCTGTTCAAGCTCCGAAATCTTTTCTATTCTCTCCTTCTTTTCTTCCGTTGCTACATTAAGGC  
AATTTTTCAAATCCGTAATGGTGTGTTTTGTTTATCTGAAATAACTTTTGTCAACATTTGTTTTCTCTTTCAGCTTTA  
CTTGTCTTATCGTCTGAGTTCACTCTGTAGTCTGTTCTTCTGCTAGTTCCAAAATCTTGCATTATCTACTTT  
CCTTTCTTCTATCCTTTCAATTTACGCGTCTGTTCAAGTTCGCAATAGTATTTTCTGTTATTAGAAATAATATCTGAGA  
GCATTTGTTTCTTCTTCTCAGCTTTACTCATGACATTACAGAGTTGACCCTGCAAAGATTTAGTTTCTTGTTCAGT  
TCCACAACCCTTGTCTTTTCTAATTTATTTCTCTGCATTTCTTCTCATGTACACGACCTTCTAAGACCACGATATTACT  
TTCATTATCTGCAATATTGTTTGCCAATGTTTGTGTTTTCTTTTTTCTGATTTTTAATTTGGTTTTGATGGAGTTGTTCC  
GTAACAATTTCAATTGCTTTTTCAAGTTCGCAATTTTTGCTAATTTTTCTATTCTTTTCTTCTGTTTTCTACCTTCATG  
CAGTGTCTCAAATTCGCGACATTACTTTCATAATCTGAAAACATCTTGATCGACGCTTGTGTTTTCTATCTTCAGTTTG  
ACTCGTTAAGACACTGATTTCGATCCTGCAACACTTGCAGTTGTTGTTCAAGTTCGCAATCTTGGCTGTTTTTTTCA  
TATTCTCCTTTGTTTTAGTTTTCCAGGCGTTGTGTTAAATTCGCAATAGTGTGTTTTGTTATCTAATATAATTTAGTT  
GACGCTTGTGTTTTCTTCTTACCTATTCTTACGGCATCAGAGAGTTGTTCCGTGAAAAATTGTAAGTGTGTTCAAG  
CTCCACATTTTTCTGTTATTTTTCTTTTTCTTTTTATTTCTGTGTTGATGCAATGTTCAAGGTTCTTAATAGTAG  
TTTCATTTTCTGAAATAAATTTATTTAATGCCTGATTTTCTTCTTTCAGTTTCTTGTGTTAAATACAGATCTCATT  
TGTAAGTGTGCGTTTTCTGTTGAGAATCATAACATTGCCCTTCTCTGCTTGTGTTTTCTTGTATTTCTGATTAC  
TTGCAGCTTTAAATCCTTGATCGCACTTTCTTTGTCTAATATAACTTTCCGCCAAGCTAGTTTCTCCTCTTTCAGCTT  
TTCTTGTAGGTCATTAAGCTGCTCTTGTAAACAGTTGCATTTGCTCTTTAAGTTCACAGATCCTTGATCTTTCTTCT  
TTCTTTTTTCTGTTTCTACATAAATGCAATGTTTCAAGTTCATGATATTACATTGTTTTCTGAAATAAATTTAGT  
CAATGCTTGTGTTTTCTGCTTTCAGCTATTTTTGTAACGGCATTGAGTTGTTCCGTGCAAGTTCGCAATTTTGTGTTA  
ATTCATAATCTTTGCTCTATCTTCTTTCTTTTCTTCCGCCTCTTCTGTTTAAAGCGCCGTTTTAAGTTCGAGATTACA  
TTTTCTTATCTGTTATAATGTCCGTCAATGTCTGCTTTTCCCTTTCAGCTTTTTTGTGTTTACATCGCTCAGCTGATC  
CTGCAATAAATTTGACTTTGTTGTTTTCAGTTCCACTAATTTGTTGTTTCTTCTTCTTCTTCTTCTTCTTCTTCTT  
GTTCAAGTTCGTTGATAAATTTCTCCTTATCTAGAATGTTTTCTGAGTACATTTGTTTTTCTTCTTCTTCTTCTTCTT  
ACCCATCAGAGAGCTGATCCTGCAAGAATTGCATTTGATGTTTTAGATCCGTAATTCAGCCCTTCTTCTTTTTT  
CTCTTCAATTTCTTCTGTCGCGCGACGTTTTCAAATTAGCAATGGTGCCTTCTGCTGTCTAAAATTGTTTCTGTCAATA  
TTCTTTTTTCTTCTTCTTCTTCTTCTTCTTCTTCTTCTTCTTCTTCTTCTTCTTCTTCTTCTTCTTCTTCTTCTTCT  
ACGTTCTTTGCTCTTTCTTCTTCTTCTTCTTCTTCTTCTTCTTCTTCTTCTTCTTCTTCTTCTTCTTCTTCTTCTTCT  
GTTGTCTGAAATAAATTTCCATAAACGTTTGTGTTTTCCCTCCTCAGCTTTTCTAGTAATATCACAGCACTGATCCTGCA  
ATAATTGTATTTTCATGTTTAAAGTTCATAAATTTTGTATCTGTCTTCTTCTTCTTCTTCTTCTTCTTCTTCTTCTTCT  
CGTTTCAAGTTCGAATCATACTTTCTTTATCTGCAATAGTTTCTGTGACATTTGATTTTCTTCTTCTTCTTCTTCTTCTT  
TGTAATAGCTCTTAGGTGTTCTTCTTCTTCTTCTTCTTCTTCTTCTTCTTCTTCTTCTTCTTCTTCTTCTTCTTCTTCTT  
GCATGATCTCATTATTATGTTTATTTGAGAGGTCATCTCTTAATTCCTTTTCTTCTTCTTCTTCTTCTTCTTCTTCTTCTT

TCTATTTGTTCTCCCTTCTCGACAATCTTGTGTTTTGTAGTTCAACCAATTCATTGTTCTGTTTAGCACTTTTTTCATT  
TAGTTTTATAATGTGAACGTCGTAATCGTCTCTGAGTTAATTTTTGGAACTTTTTCTGCGTCTACTTCATATTGAA  
GGTCTTTGATAATGTTCTCCAATTTGGTTGTTTCATCTGATAGACTTTGTAACAAAGATAATTTCTCGTCTTTTAGG  
TTCTGTATCTCCAGCATCTTCTTTTCGATAATATTACGAGAGTTCTCCTGACTTCTTTTAACTTTGGTCTAATTC  
ATTAAGTTCGTTATTAGTTTTCGCGACATCATTGTCGTGTGTTGCTTTTTCAGAAATATTCTTTTCTTCGATTTCTTCAT  
TCACGCGATGTTTTAAGTTCAAGATAGTGCTTTCTTTTTCGGCAATAATTTGTGTCAATGATTGTTGTTCTTCTCA  
AACTTTCTACTTACATCACAAGTTGATCAGATTCTTTCATAGCGAGAGTTTTTTTCAACACCTCATTTCCTTCC  
TCAAGAGCTTCACAGTATCTGTTTCACTTCTAGTGACGTCTTCCAACCTTCTGACTTAGTTTCATATACGGCAGCCGCC  
TTAGATTCTGACTCTTTCAAACATTTCTCCCTTTCTTCAATCAACTCCTTGCTAAACTTGTTAATCAGTAAATCCTT  
TTCTTGTAGCAACTGCGTCATCATTGCATCTCTGTCTCTCAAGTTCTTCTCGTACCAACGTTCTAAGTTTCATAGCAC  
ACTCTGATAGACTCTGCATAGCAGCCGCATAACCCCTCTCCAGTTTGCACATAGTCGCGTCCGTTATTTTACCATCT  
AAGCTTAATATTTCTCGCCTCAGGGTCTCTGCAGAGAAACCCTCGGATCATCTTCTGTGTGTACAACCTCCTTAAC  
GGAATTGAATGTCTTTATACTAACGGACAGTTCCGGTCAAGAATTTCTTCATGTTTATTATTTCCGACTCGTTTATTC  
TGTTACCTCGGTCAATCGGTCCCTTTCTTTTGGAGAGCGAGTTGCTTCTCTGAGCATCGTCTTAGGTGTCTGTGCG  
GTAGTGTCTAGGAAATTTCTAGATCCTCCATCGTCACCGTCCCCGCGGTGAGGCTGCGTCTCAATTCGTTGTGCGCA  
GTTTCGCCGAATTGCCGAAATTGGTCAATTTCTTTCAGTACGGTATTTGATTTGATTTTCAGCTATCCTCTTCAATATCA  
TCGCCTGATATTTTCGCGGAGACTTTAATTATTTGGCTCGCTCGATTTTTCGGTTCATGCTCATTTTTGTCACTTGCTTT  
TTAAGCTCCGCTATTTCTCGTTCTTTTGTAGTACAATTTCTTGTAGCTGACTCGACAGTTGCTGGCAGTTTTCTTT  
GCTAACCTCGAGATCCTTCGATACATCGAGAAGTTTATTCTCAGATTCCGGCTATCAAAGACTTCAAGTGTGTGACGT  
CACATTGCAATGATGTGATGGTCTATTTCTATCCAGTAGAATTTTCTCTAAATCTGATATTGTCTTATAGCTTTCC  
AAGGAGGAATTTGTGCAATCTTTGGTGAATATCAGATTGATGGTGTGACTCACGAGCGTGCACACATTGAGCGCT  
TTTGAACCTGTTTTTTCTTGGCTTGAATGGCAATTCGAAGCTCGCGTTCTGGAAGCTGGTGAAGCGGAGAGATGA  
TCGCTCCTCACTAGAAAAGGCTTGCTTTATTTTTTCCGCGGATATAGCTCGCCCCGATACAACGCTCCACCCAACGTT  
CTAAGTTCATAGCGCACTCAGATAGATCCATTTTGGCTTTTCATCCTGTTGAGTTTGTCTTTCGATTTCCGCGCGGACT  
TCCATCACGGTGACGGCTTGGGCGTCTTTCGCTCCTTCTCCCTTTTGTAGCTCGTGCCACCTCCGAGTGAACATGTTG  
CAGCGACATGAGCGAGCCAGAGTGTGTTTCTCCTCAGCCACTCCGCTTCATCCTTCTTCATGAGGAACTTCTCAC  
CGACGTTCCACAGCTCCGTGGTTCAGCGCCCTGATGTGTTTCTCGTACGCTCGGCTCGACTCCTCAAACCTTCTCACGA  
GTCTTTTCGCAACTCGTGTCTAGAGAAATTATCTCTTCTTTTGTCTTCTCCTTGAATAATCCAATCTGTCTCTGATA  
TAGTTCTTTTCACTTATTGTTGGTGTTCGAAGCGACGGGCGAGCGCAAGGAGTGTGTGTCGGATGCTCGCGAG  
GGCTCCTCTTGTGGTGGTACCAACCAGGATCATTGATGCAAGAGCTATATGCTTGTGTACACCCACCTTAATATC  
CTCCTCGTGAACGCGGGCGGAACTGCGTCTCCGCGGGGTAGGAGCTCTTAAGGTGCGGGCGACACAGCGAGTTCC  
GCCAGCGCAGCTCCGACAGGGCGGGCGGGCGCGCGGCGTGGAGGCCAGCTCGCGCAGGCAGCGGTTGTGCAACACC  
TCGCCCTCCTCGTCCGACATGTGCAGCGTGCAGCCCT

>aly536.149:G1488C

ATGGTGGGCGAGGGGGCGGGCCGCGGGCGCGCGCTGGCACGTGGGCGACTCGCCCCGCGCGCGCACATGGGCTA  
CGCGGGCCCCGCGCACGATGCGCCGCTGGCCGGGCTGTGCGCGGCGCCCGCGGCCGCGGTGCCCGCCGGCGCCGCCA  
CTGCCGCCGCCCGCGCTGCAGCGGGCACACTCTAGATCGATGTGCTGCTGCCACCCGAGCCGTTTATGATGCTC  
CGCGCTAAAGCGCTGAGCAAGCGTGTGATAATCAATGTGGGCGGCGTGCGGCACGAGGTGCTGTGGCGGACGCTGGA  
GCGGCTGCCACACACGCGTCTGGGACGACTACGTGACTGCAATACTCACGAAGCCATAACGGAGCTCTGTGACGACT  
ACTCGCTGCAGGACAACGAGTATTTCTTCGATAGGCACCCGAAGAGTTTTCAGTTCCATCCTTAACCTTCTATCGGACT  
GGCAAGTTACATTTAGTGGACGAGATGTGTGTTGGCCTTTAGCGATGATCTAGAATACTGGGGGGTAGACGAGTT  
GTATCTTGAATCGTGTGTCAGCATAAGTACCACCAACGAAAGGAACACGTTTCATGAAGAAATGAGGAAGGAAGCGG  
AAAGCTTGCAGACAACGCGAAGAGGAGGAGTTCCGGCAGGGAACCTTGCACACAGTACCAGAAGTGGCTGTGGGACTTA  
CTCGAGAAACCTACCACAAGTATAGGAGCCAGGGTGTGTCGCGGTGGTATCGATCCTCTTCATCGTGTGTCCACGAT  
AGGGCTCACTCTCAACACCATACTCAGATGCAAGTGTACGACGACAAGGGCACTCCAATGGACAACCCCTCAGCTGG  
CCATGATTGAGGCGGTGTGCATCACGTGGTTACGCTCGAGTATGTCTCGGATTTCAGTGCCTCGCCGGATAAATGG  
AAGTTCTTCAAGGGTGGACTCAACGTAATAGATTTACTGGCTATATTGCCTTATTTTCGTATCTTTTATCTCCTCGA  
AACGAATAAAAACGCGACTGACCAATTTCAAGATGTACGTGAGTGGTCCAAATATTTTCGTATAATGCGAATATTGC  
GTATTCTAAAACCTCGTTCGACACTCGACCGGGTGCAGTGCCTCGGCTTTCAGCTCAGAAACTCATAACAAGGAGCTG  
GGACTGCTCATGTTGTTTCTCGCGATGGGTGTAATCATATTTTTCGTCGCTGGCGTACTTTTGGCGAAAAGGAAGAGCC  
GGGGACTAAATTCATTTCCATTCGCGAAACGTTTCTGGTGGGCGGCATCACCATGACCACAGTCCGATACGGTGACA  
TTTACCCACGACCCCGTTGGGCAAGGTCATCGGCTCAGTTTGTGTTTTCGCGCGTGTGGTAATTGCGTTACCC  
ATCCCTATTATCGTCAACAATTTTCGCCGAGTTTTTACAAGAATCAGATGCGGCGAGAGAAGGCGCTGAAACGACGCGA  
GGCGCTCGAGCGCGCCAAACGTGAGGGCTCCATCGTTTCTTTCCACAACATAAACTTGCGGGACGCGTTTCGCCAAGA  
GCATGGATCTCATCGACGTGATCGTCGACACAGGACACAACCTTGTGCGAGGCGGACGCCATTAGCTTGGAAAGGCGAA  
GCCCCGCCATCACCGGCTGCTACAAGCAATACGAACATGCCATCGGCAATAAGATACCGCAGCGCGCCGATGCTAT

TCAGTTTCAGAGCAGTCTTAAGCCAGAACGACGCTTCTCAGCCGAAGGCCTAGGCACGCCGGAAACGCGCTTGCTTA  
TAAACCCTGAACCAACTCCAGAAAAGAAGATGGCTGACAAACAGCTTGACTTGGATCAGCTGCCTTCTGAGTTTTGAA  
TGTTGTTTTTGCACGTTCAAGGGCTACAAGGAGTTCATAGACGCTGAACAGTTGATGCCGATGTGACGTCGGACCT  
GCGGCAGCCGGTGTGCGTGGAGCTGGCGTGCCTGCAGCGCCACCCCGCGCCGCGCGCTGCCCGAGGCCACGCCTA  
ACAGCCTCGACAGCCCTGAGGGCGACATCGCATGCGAGAACGACTCGTCAAACCTTGTATGTGAATCCTCTGGACGGT  
AGCGGGCGGGTGGCGCCGGCGGAGGTGAGGGCGGGGTATCGACGGAGTTTAGCGATGTGCGCAAGAGCGCCTCGGG  
GGACGTGTTGTGTGCGAAAGATTTCGACGGGCGAAGGAAAGGCGCGCTTCCAGCAGGTGAGTCGCGCCTCCGCCGTAA  
CGAGACGAGTGCCCGCCGCACTCGAGTGGTTCGGAAGAGGAGAGAGACCAGCCGAGAGGAATTGCAACGAGAATCATT  
AACCATCACATCCTCTTCGGTAAAAATGGAATAAACGAAGTGGAAGTGGATGGCCGCTAGAGGGCGATTCTCGCTC  
GCGTTCATTCTTAAAAATAAGGAATCACGTGGCACTGACAGCGAACTGCTGCTACAAGAGACCACTTCGTTGGGTG  
CTAATGGAGATTTCGGGAAGCGAGTCTTCACCGATTTCGACTGAAAGACTTCAAAGGTCAAATCATAAGGGCAGCACG  
GACAAGGGCAACTTGGTGTCTTAG

>aly860.7:A748G

ATGGTGGACGGGGAGAACAAAACAATAGATACGGTGCAGTGGCTCTTCGCATTAGACCCTTAATGCGGCAAGAGAC  
CGAGAGGGGCTGTGATGAGTGCATCGAAGTAGTGAATGGGGAGCCGCAAGTGACGATTAAGGATTTAGCCTTTACCT  
ACAACATATGTGTTCCCGCAACATATCACACAGCAAGAGTTCATGATACAGCCGTCAAAGGTCTCATCGGGAAATTG  
TTTTCAAGGATACAACGTAACAATACTTGCTTATGGACAACTGGCTCAGGGAAAGACTTACACTATGGGGACAAATTA  
CTCTGGATCAGATGGAGATTCCACCAAATTGGGTGTAATTCCCAAGCTGTGGCTGATATTTTTGACTTTATAGAGA  
CACATGAAGATAAGTTTGTGTTCAAAGTGTGAGTGTCTTTTCATGGAGCTATATCAAGAGCAGTGTATGACCTGCTC  
TCTGGGAAGGAGAGGGGCCATAGCATCATTGAGATCCGGGAAGATATCAATAAGGGGGTCATTTTGCCAGGTATAAC  
AGAGTTACCGGTAGCATCAACAATGGAGACCATGATGGTGTGCTGGAGCGAGGGTCAATTGGGCGCGTGACAGGCTCCA  
CAGCAATGAACCAGGCCTCCAGTCCGAGTCACTGTCTTCACTATTATTATCGCCAAGGAGAGTGCAGTGCACAAG  
AACATAGCAACCACCTCCAAATTCCACTTAGTAGATTTAGCCGGATCGGAACGTAATTAAGGAGACCAAAGCTGTTGG  
TGAGCGCATGAAGGAAGGTGTGAAGATCAATCAGGGCTTACTGGCACTCGGCAACGTTATTTTCGGCGTTGGGTGATG  
GTACCAATAGAAGCTTCATTAGTTATAGGGACAGTAAACTGACAAGGTTGCTGCAAGACAGTCTCGGAGGCAACTCT  
CTAACATTGATGGTTCGCGTGCCTGAGTCCAGCCGATTATAACTTGGACGAACTGTGTCCACTCTGAGATACGCTGA  
TCGCGCGCGGGCTATTTCGTAACAAGCCGGTTATCAACCAGGATGCTAAGGCTGCTGAAATTGTTAGATTAATAAATT  
TAGTGAATGAACCTAGACTACAGTTAGTTGGTAAACTACCAACAATAAGCGAACAGAATAATGAACAGTTACAAGAA  
GAATTTGACAGAGAAAAGGCGAAGTATGCAGAAGTGTCAAAGCAAGTGCAGAACATTTGGGTAAACAT  
GTTAATTGAGAACAATACTGTGCGAAAAAGCTCTTTTAGCTGAAGCAGCCAAAGATAAAAATGAACGTAATAA  
ATGAACTAACAGAACAGTGTAACTAACTATAGATAAATTTGAACACAAGTGCAGATTAGACGATGAAGTTCAAAG  
AACAGTGTAGTAGAGTATTTGAAAGAGATTAAGTGGAGTTGGAAGATCTACAGTCAAGTGAACCTGAAAGACTAACGA  
GGAGTTGATAGACCATGAGATCAAGTTGTCTTTTCGTTAAAGAAGATAATGACAGTGAAGGTTGGACGAAGATGTTT  
TACTGAATGAGGATCAAGCTGTATTGGAGGAAGAGAAAACGGGCGATGGGACAGGTGGCACTAAACCAAGAGCTTCAA  
GAGTTGAACCGCGCGATGGCCATCAAGGCGTCCGTAGTGAAGCAATACTCGCCAACAACAAGGAGATGTTGGACAG  
TCATAACAACCTTCGCGAGAACGAAGATAAGATAGCACAGTTGGAGAAGGAGAGAGATGAACTCTTGAACAATTGA  
AGACAAAGAGCAAAGACCCGTCACGAAGAGCGTGCACGAAGGTGTCCACGCTTGAAGCTGAGATCTCTGAACTG  
AAGAAGAGGTGTGACGAACAAGCCAACATCATCAAGACCAAGGAAAAGAACGAGGCTAAGATTGCTGCTCTAAACGC  
GGAGTTACAGGCTATGAAGGCTACGAAGGTGAAAATAATAAAGCAGATGCGCGTAGAGAGCGAGAAGTTCCGCAAGT  
GGAAGGCGGACAACGAGCGGGCGATGGTCCGCCTGCGGAACGAGGAGCGCAAGCGGGCCACCGCCATGGCGCGCATG  
GAGTCGCTGCACGCCAAGCAGCAGAACGTGCTCAAGCGGAAGATGGAGGAGGCGTTCGCGGTCAACAAGCGGCTCAA  
GGAAGCGTTAGACAGGCAGAAGCAAACCTGCGATGAAGCGGAATGCGAAGGGCAGCGTGAAAGCGGGCGCCGTGCAGC  
TGTACATCGAGCAGGAGCTGGAGGTGCATCTCAGCATCGTTCGAGGCTGAGAAGTTCGCTGGAAGAACTTATGGAGTAC  
AGAGCGTGGATAACAGAACAATTTGAGAACCTACGCAACAGCACCGATGACGAAGCGAACAGAAAAGAAGATTGCTGA  
ACTGGAAGACGATTTGGCGCTCCGCAAGGCTCAGATATCGGACCTGCAACAAAAAATCATTACTGCTGATCAAGCGA  
AGGTAGCCCTTAAGTGCCTGTTTCAACTGTTGGTTGACGCGAAACGCGAGATGCAGAATCAGAGCGAGAAGGGCTTC  
CAGGCGGTTACGAGGAGTCAAGGAGGCTCAGATCGACTCGCGATCGAGTTTGGATAACAGCAAAAGCGGAGTTTGA  
GAGGCAGCTCGCGATGGTCAAACCTGCAGAGTGCAGAGTGAAGTAAAGTGCCTTAGTAGCGCTTCAACGCGGTGTAGTAG  
GCAGGGGCGACAGGAGCGAGGCGTGAAGCACTTGCAGAATGTGATACAGTACCAGCAGGACAGGCTCGAGCAAGTC  
GAACAGGAGAATAAAAAACTACTAGACGAATTGGAAGAACTCCGCGCCGCTGGCAAAAAATCTAAGAAACGTGTCAA  
GAAGGATCCCGTGGAAACCACTAAAAAGATGGAGTATGTGGAACCTACTGATGAAGAAGACGATGAGTTTGGAGACC  
AGGATAAGGATCCTGACTGGAGAGCCACGCCACTGTTCAAACGCATACAGGCCAGCGTTCGCCCTAACAAATGAAC  
TTCACGGTCTCCGACAATGACGCGAGCGCTGTCAACTCGCGCGCCACCAAGCGGGGCTCCGACGGAGCTCCACATTG  
CACTTGTGCGAGGTTTCGTGCTCCACCAAGATGTGTGGATGTGTCAAGGCCGAGTTGGGATGCGGTTCGCGCTTGTGCT  
GCCAAGCGGAGCTGTGTAAGAACAGACGTCCGGTTTTCTCCGACAGCGAGGACAAGGAGAATAACCCGTCAGTGC



GAATTCTCTCTCGACACCACACCACCATCGTATTTTTGACAAACGCGGTCTTGACGCAACTTTTATAAAAAAGAAGAA  
GAGCTATTTTTTCCACATGAACAGGCCAATGGTGATAAACAACAATAAAGACTGACTAA

>aly214.24:3520C(not\_A)

CTTGGCACTGGGTGTCCTTTATGATGAAGAGGAGAAAACGCGGAGATCGTGATGAATCTCCAGCGACGCCGTCCCATC  
TCGTAGGCCAACCTTTTTGAATCTTTGGTGTGACTGGGGGTGGACCAATACTTGTCTGGAAGTAGTAGTCTTTCTT  
GCAGATTTTCCCTCTGGTCTAGATGGAAAACTAATTTTATGCCACCCGGTGTCTTTTGTGGAGGGAGCAGTTTCTTC  
AACTTCCCTCTGACTTGTAAATTTAAAGCCCGGTGGAAGAAGGCTCGAAATATCAGCAACTTTGATCAAAGGAATGT  
CTTCTTTACCTTCAGTGCTATTTGGCTTAAAACCAGGGGGCAAGAAGGCTGATATGTCGATGGGCGCAGGTTTTATT  
GGAACATTCCATAACCTTAGGTTTTACCGTTGTGCGAGTAGTAGCAGATGTACTATTTGATTTAAAACCTTTTGGTAA  
AAATGCTGATATATCCAGCTTTTCTACTTTATCTAGAATATCAACTTTGCTTGTCTTTTATCTGGCGTTTCAGTGA  
CAGGGGGCTTATATCCAGGTGGTAATAGTTTACTGAGGTCATCTTCTGAATCTTTTTGTATTATCTTCTTGTGAT  
CTGTTCTTGGGTTTTATATTCTTTAGGAAGTAATGATTTGTCTCATCAAGTATAATAACTTTGTTCTTGGAGCTAATTCC  
AGATGACCGACCTTGTGTGGCGTTAATTATTATATTTCTAACAGTCGATGATGTTGGAGATACAGTTGTAGTCGTTG  
TGGTCGTCGTCGTTGTTGTTGTTGTAAGTACTAGTTGCTTTTAAATGATAATCTTGGTTTTGTAGCCTGGAGGCAGT  
AAGCCAGACAAATCATCCATAACGGTCACCAATGAAGGTTTTTTTTGGGTTTTAGGTGTTGTTGAAGTTGTTACTCG  
AGGAGTAAATTTCTTTATGAGAACAGGTAATGGTTCGGGTGAAGATCTTCTGTGATAACAGAAACCTGAGTACTCT  
TCAATGTAAATACATTAGGAGGGGTTGGTGTGTAAGTGTACTTGTAGTCGTTGTTGTAGTTGGCTCTGTAGTTGACTCAGTT  
ATAAGTTCAATATTTTTATTTTTATTATCCAAATTTCCAGACAATACAGCACTTGTAGTTCTGATTGTATACTATC  
CAACTTGTCAATTAATATTTTTAGTTGAAGAAGAACTACTACTTTGACTAGACACGTCTTTTGGATTTTTCGTTACAA  
ACTCTTCATCATCTTCATCCTCTTTCTCATCAGTCAAACTTGTCTTTCTTTCTTGTCTACTGTTGGGAATGGT  
AAAAACCTGGCTCCTGAAACACTTCGACTTGTGTTGAACTGAAGCTACTACTATCCAATTTTCGGTAGTTACGGGGTA  
TGTATCATTACTTTCACTACTTAACATAGATGTACTCGTTCTGTAGATTTTGGCGTACTAGGAGGGTAAGTTGCAT  
CCGGTATAGAAATAGTTCCATTGACGACGCTCTTAGTTGTTACAACAGAAACTACTTCTTGTCTTAGTATAGATGGT  
GTTTTCTATTGATGTTACATCTTCGTTGGAGAATGTCAGTTTGGAGCTAGGTGCTGTAGTATCTTTAACATTATCAGG  
TTGATCTATCAAAGTTGTGTCAACAAATGTTTAAAATTATCATCTTTAACCATTTGTTTTTTCAGGTTTCATGACCA  
ATACGTCGAATGCTGTTACATTTGTATTAATTTCTTCTGTAGTTCTTTTCGGGTTCTTCAGATGCATCGTATTCATCA  
TAAATATCAGTAACTTGTTCAGAAGAATGAGTTACTGGTGCCTGCGTTGTATGTTTTCACCTCGACACCATCAACTTC  
GTCATAATAGTATTCTTCTTCGCTTTCAATATCGTCTTCAGGTTTCATCATCGTTATCTATGTGATGAGTTTCAGTTG  
TTGTTGTTGTTGTTGTTGAAGTAATCTTTGTTTTTCACTTGATATTTCAACAGACTCTTCGGGCGATTTTTTGA  
ATATTATCAACATTCATAGAACTTGCATCGGGCTTACTACTCGTGGAAATCTGTATTATTTGGTATTATTGGACTTAAT  
AACTTCAACATCAAAAGAGCCTTGAGTATTTTTTCACTAATCTCTAAATGAGCTTATGTCACTGATGTATCTTCAA  
GTAATGGTTCTATGTCTAATACAGACTTATATTCTGTAGAAGGACCCTGATACATGTTATGAGTGTTTTTCAGATGGT  
TTTTATGTTGGAACCGTCCGAGAATGATTTTGAATTGGTACATTTTTGAACATTCTTCTTACCATCTGCAGACGATGG  
ATTATAGTTAGAAAATCGAGAGCTATTTGGTTTTGATATTCAGTCTTTGCTTGTGTTGCAAGCTTGGTAGGATTGTATG  
TGGTGACTTTATGATGATCAAATAAGTCTTGATTGTCAATTCATCGTATGTTATGTGACCACTGATG  
CCATTACTTTTTAGGCTATTTCCATCAAATGGTATGTTTTTAAATCTACTGTTTTGTAAATAGTCAATATCTGGATT  
ATTTAATGTTATCTGACCCAAAAATGTTTCAGGTTTTGATGGATCATTTTGGTAGGCAACTGAATGTATTTGGGAAA  
CGTCCGGCCTTTTTCGTTGATGCTGGATGCACAAGTTGAAAGTTAAATGGTAGGGCAGGCCTAAATCGTTGCCTTTGC  
GATGGTGTAAATCTGTTGATTAACGTAATACTGCGTTCCAGACTGACTTCTGCCTGTTGGCAACTGAAACGGTGA  
TGGGTTTTGGTTGTAATTTGACTAGGGAACCTCACATGTCCATCATTATAGAGAGGTTGTTGTGCAGTTGGCGCTA  
CTCGGTAACCTGTCGCCGTGTTTGAAGAATGTCGACGGACGGTTGTTTTGGAAACAAAGGTGGTTGAACCTTGAGCGAAA  
CTTCTTTCTACAGGTGTGTAATAAAAGTCGTTTTTCACTGAAACTATTTTTAATAGTAGCTGCAATATCACATTCTCG  
TCGGCATACTCCAGGAGTGGTTGGTGGAGGTGGCGCTGTTGTGCTGTTGTCGTCGTAGTCGTTACGCGTCGAGTAGTAG  
CTTCCGGTGTAAATTTCTGATAGTGGTGTAGTAGATGTAGCGTTCTTTTGAAGTTCCAGCAGACGTTCAATTGAAAAC  
GGTGTGGTAGATGGAGAAGGCCAACAGTAAATTCAGTTGAAGCTCTCTTCTTAACTCCTTTGCCAGTCTTTGCC  
ATTCTATGGTATGTTGATCGAGCAGCTCAGGCACCCATTTTACTCCAATAAATTTCTGTATACGCCGGATCCATAATA  
AACTTTCTATTTCCAAATTTTCCAGCTGATTTATCGATAGTCTTTTGTCTATCTTTTCACTACTCTTTCTCATTCTATC  
TTCATCTGGCTGGTCACTTGTATTATATCAGGATCAAATTCGTCTTCTATCTTCTGTTCTTCTAGAACCAGGCTG  
GTTTTGGCGGAATGAAGAGACTTATGGAACAGTTTTCTTAAAGTTTTCAGAGTGTCAACTTTTCTCTTCAACCTCGTTT  
TCGATAAAATAGTCCACCAGTACAGAGCCTTACTAAATCCGTCTATGCGGATTTCTTTGTACCCTTGTGAGTAA  
ATCAGATTTTGTAGTAGACGGAATTGAGCACAGTGACCCAAAAATGACGACAAATAGTAATGAAGCAAGAGCTATAA  
CGATAACAGCTATACCCCATTTGTGGAAGTAACGATTCCTCCTCAGGTTCTTCAATTGTTGGTTTCTCGCGTTTTGGC  
AACACTTTCTGAAGGAAGATAAGGCAGATCTCGCTCCTTCATTTGATGCATATCATCAAAGCCTCCCATGTGACTC  
TTGTCCAATTCACGAAGCATGTCTTCACTTAGTGGAATGGGCTGCTTAGTTTTCGTACTCTTCTGTGCGATTGACTAG  
CCGTAACCATTTCTGTTGCTCCGTATATCTGCGAGCCACGCCGGAGTCTGGCGTGTAAATGCTGCATATATTTTTG  
TAGCTGCGGAGTCCATTCCGACCGCAAGAGTACCAGGATTCGGGTACGCCAGTTGTTTCGATGAACGCCGTTGACA

TACGCTAGAAAATTGCTGTCTGTAGTCGGAGCGACGCCGCGAGAAGTGTGACCGTGGGTACTCCCCAGTGTACCCATAC  
ACTTGAGAGCCGCCGCTGTCTGCCCGTATAATTGCGATCCTCCGCCGTAG

>aly489.5:G307T

CATTAAGAAAATCGAATTCATTTCATTTAGACGCATTAACCACTAAGTTGGTAGCTGCCTCCTCACTCGCGCCTATG  
CTCATCGCCTTCTTCTTAAGGATACCCAAATCCGTGACGTTTTCAAGGAACTCTTATGTGCTGAGAGCACTTTGGC  
ACTCTCTACGTCTTTCTTCAGCTCCTCCATGTCTCGCTTCAGCTTTTGTCTCGTCTGTTCTGGAACCAGGTGATCACTT  
GCGCGTTTCGACAGCCCCAGGGAACCTTGCATTTTCGTCTCGGTCTGCAGGCGAGAGGTACTTCTGGTAGAGAAACC<sup>G</sup>C  
TTCTCCAACCTCGAAGATTTGGTGGTTGGTCAAAGCGGTTCCGGATTTTCGTTTTCTTCTCGGTTGTGGCCGTGAGTT  
GAACAGGTTTAGGTGATTCGACTGACCAT

>aly904.14:T439G

ATGGATGAAACAATAGTGCTGCCGTCTCCCAATTGGTTTTCAAGTTTTCGGGCATGGCTGTTAGTCCGGACGGTTGGTT  
GTTCTACGGAGGCCCGTCAAGAACTTTTTGTGTTTTGGAGCCCTTACCTTCCGACTTTGACGGTGTGATTAGCAAGC  
ACCATGGATACCGTGCTTACACGTTTTCCGAAGGCTCACACTGAAAAAATTACCTGTTTAGATGTCAGTCCAGCATGG  
CCAGAGAATAAATCTGTTATAACAGGTGCATCAGATGGCTCAGTTAAGGAGTGGAACATAGAAAAAGTTAATAAGAC  
AGTACAAATCAAATCCAGATTTAATCATTTCAGTACATTTGAATGAACAGGAGGAAGTAGCAGGAGTGGGCTATAGTA  
CTAATAAATATGCAATAACAGTAGGTGCTTTTTGGAACAATCGTAAAATGGGAT<sup>T</sup>TGAAATCCAATATTATTAATCG  
TATAATCTACTACTTTCCAAGTTCAAGCCAACCTGTATGTCTTGTCTCCACACCTTCCACTTCATGTAGCCGTTGG  
AACTAAGCAAGGAGTTGTATTAGTTATAGAAGTGAATGATGTAGCGAAAATGTATATAAAATGAGGAGTCATGATG  
ATGAAATCTTAAGTGTGTCTGTGGTGCACCAATATGATGTTATTATGAAGAAGTTCCTAAATGAATCAGAAAAAAGG  
AAAAGTGCTAATGCAAGAATGGAGAAAATTAGGAAAGATGCAGAAAAAGAAGAAAATGAACAATTAGATGAATCAGC  
TTTAACTAAAACATTGCCAGAAGACAGTTTTGATGAGACTGTTGTGGAAGAAGATGATATGTTTTGATATATATAAG  
ATCATGAGGACAATGAGTTTGGACATAAGAAGTACAAGCCAGAGGAAATACTGATAAAAAGTCAAGGAGGTGGATGAA  
AAACCGTTTTGATTATTTAGCAGAATGTCAGAACTGAGGGACGAGATATTAAGAAGAAAAGAGGAACCGGAGCCTTC  
AATAACAGCTTAGTGGATGCTTTTCGATAAAAACACATGTAAATGATGATGTTACAAAAGTTGAGGAGGAAAAGTAAAC  
CAAATCTCGGGGATAAAGAGGAGGGTGACAAACATAGTGGCCATTGTAGTCACCACCCTCAAAAACATCTCTTAGCA  
TCTATTGGTAAATATGGGAATTTGCGCTTATGGTTCGAAAATGGTAAATTTGGTTGGTAGCGGTGCAATACCACAACA  
ACCCTTCAACAAGGTGCACCATCAGAAAAGTGAAGCAGCCACTGTGGGCCACACTGCTGTGGTACAAGCCCAATGTCC  
TGCTCATCACTGATTCAAAGGGCCAGTTGTTGGAGTGAACCCATTGAACACTGATTGCAAAAACAAGTTAGATTGG  
GGTGTGGTAGACACGTTCCACAAGCGTGGTCTCTTCTGTATGGTGTCTAATGCACCCCGCAATCAGAATAACAGAGA  
TATATCCAGTACTCAGGCACAAAAGTAAATCCCAATTAGATGGTAACTGCAACAGACCAGTCACCCGAAGATTGATG  
TGCCAGAAGATGAGTGGTTTCGTCTGGACAGCAGCTCAAGACCGCACATTAGTGTGCTATTCAATGAAGGAACGAAGG  
AAGATAAATACATATAACACTTGTGGTGGCTTCAATTTATACTTTACAGTGTGTCCGTATGATGCTAGAAAAGATTGC  
ATTTAGCGTAGGTGATGGTGCATTCGTATCTGGGAGGGGGATATGTCAGATGTTGATGAGAACAAGTTGGCATTTCG  
GACAAGTCACCACCTATTGGCAAAATGTTTCAGGGCAAAGTGTGACTGTTGCCTGGCATCCCCTAAGGAAAATATT  
TTAGCGTTTTGGCACTGCTGAATCAAGGGTGGGTATCCTGGACATCGGCGGTAAGGTGGAGAGGCGGCGCGCGTGT  
GCAGCTGGGCGTGACGGGCGGGGTGTACGCGCTGGGCTGGGACGCGCGCGGCCAGCTGTACGCGTGCGGCGGCGGCG  
GGCTCGCCGTTACCAGCGGAGACGAAGAATCTACGATGGTGTCTGTGGAGTTGGAAGGGCAGAAGTGGCAGCTTACC  
GCGTTGCAGTGGCACCCCACTGGTCTGATGGTCCGACGCTACTCTGGCTCGGTGGCTCTGTTGTCTGACGTCACCTA  
CGAGATCTTGGCTGTGAACCTTTGTTTTCAAGAAAATGATTATAGTATAGAATGGCACCCGCAGTACACGTCAAATT  
CTAGCGAGGAGTCATCTTATAAAGATATGATTGCTGTGTGTGCTATGGACAAATGTGGCAAAATAGCTATACTTAAG  
TATAGTCAGGTAGAAGATGGAACAAAACAATTGGAGACTGTCAAGTGGCTAGAAGGACACACGTCCTCAGTGTTTCA  
GCTTGTGTTGGAACCCACATATTGAAGGGCAACTACTTTTCATCATCGCAAGATTGTACTGCAAGGGTGTGGGACGTAA  
GTTCCGGGCGCGTGCACGGCGGTGTTTCCACAGCGTGCAGCGGGCGCTCGGCGTTCGCTTGGAGCGCGTTCCCGCTGCGC  
GTCGCGATCACCGGCGGCGCGGACTGCTGCGTGCGGGTGTGGCGGCCGAGGACCACACGCGGAGGTGCTGCACGA  
ATACAAGGAGGAAGTTATATCAAAGAAGGAGAAAAAGAAGAGAAAAGCAATTGCAGAAAACGCAGAACAGCAAAATG  
AAGAGATTAAGACACCTGAAGTCTCGCCCGATACGGAAACCGGACCGTACGGCGAAAAGTTTGAAGCGAAGCGAACG  
GACGCCAATCGCAGAGCCTATAAGAGATTCCTTACCAATTTGTACTAAAGAAATGAACGACTGTACCCCAATG  
TGTGAGGAAGTTGGCCCAAAGTTTGTCAAATGAAGCAGAAAACAATAACGCGGAGAGGATCCGATAAAGATT  
ATGACACGACCTTCTCAAATGTTTCGGCACTACCAACGAGTTCAATGAAGTGTGGATATGGAGATGGAATATCAC  
CTAGAGACCCAAGACTACGAAGCGTGGATAATGCTGTGATATTCCGTGGGCAGATCGATTCCATGATTAAGTTCCG  
GGCCGAGAATGATCTCTTGTGCCCTTCTTAGTCAGCATTGCTCCTTGCCTCTCCTTCAAATATTGGAAGGACGTGG  
TTCAATTGTACTTGGCGCAGATAGATAGATGTGTTGCATTGAAAAAAGAAAACAACACTAGATGAGGTGCGTTCGCTAC  
GGCGGGCCGGCGCTGCGCAAGGCGGCGCTGCTGCTGGCGACGCACGACGTGCGCGGCGCCGCGCGCTGCCTGCTCGC  
CGCGCGGCTGCACCGCGAGGCGTACGTGCTGTGTGCGCTAGGCACATGGATAGCATTGCTGAGGAGACACTGAGGA  
ATTGGGTGGAAGATATCCATTTCACTGCGCTCGGTGAACTAAACACAGCAACTGCAGTTATAGCCGTTTTTAAGAAA

GATGAAGAGGAATGGTTGAGTTTAGCGGTGGATCTCGCCAAGATCTCGGGACAACACACATTGCTGGCCATTTGGA  
AGATAAGAAAGAGCAAATCAAAAAGATGCCTAAGAATGAAGAAGTAGAGGAAACGTTAAAGGAACTACCCACTAGAT  
TGAATTGCTTATGAAGAGTAATAATGATGTTAAAAGTGAGGGTACTGAGACGGAACCAAAGAGTAG

>aly3446.8:T2308A,C2309G,A2500C

ATGTGGAGAACGGATTCCAAACATTTTATGTCAGCGGGATCCCGATATGCAAGAAGTTGTGTACCGTGTGACAAGGT  
TCTGGAAGAGCTGGAGAAGATAGACGATGATACAGACACCTTCGGTGTAGACTTCGTCAAGATCAACGACAAGCGGC  
TCGCGAAGCAGTATGGCATCACGAAATTCCTCCGCCCTCACGTATTTCCGTGAGAAGGAACCGATCATTACGAAGGA  
GATCTCATGGACGAGGAGAGTGTCTGGATTTCTGACGAGTTTAGAAGCAATGGACCTTCCTGACCGGATAGAAGA  
AGTCAACCAGAAGATTCTCGGCAAGATCATCGAGGAAACCGAATACGTAGCCGTTCTATTCTATAAACCTGAGTGT  
AGAAATGTGCGAAAGCCTTACAAGAGCTGGAAAACATCGATGATGAAGCGGACCAACTTGGAAATAGGCTTTGTAAAG  
ATCCACGACGAGGAACTAGCCGAAGAGTACAGTCTTGGCGAGCTGCCAAGACTGGTGTACTACAGGCATCAAATACC  
TATTATCTATGAAGGTGAACCTGAGTAGGGAAGAGGATGTGCTGGAGTGGCTCATTGCGAATAAATCGACTGGGGATG  
AGGAAGATGTCATCGAGGATGTCACAGCTAAGACACTGAACACTCTCATTGGAAATGTGGACAACCTTGTGTAGTA  
TTTTACGATCACGGCGACGATGAATCTATGACAGTTCTCGGAGAGCTTGAGAAGATAGACGATGATTGTGACCGCCA  
TGGCATAACAATTTGTCAAAATCGACGATAAGAAGGCAGCGAAAGACTTTGGAATTGACGATGTACCATCCATTGTTT  
ACTTCGAAAAGCAGATCCCCAATGTTTACGACGGTGACCTCGAAAACGAAGAAGAAATTTAGAGTGGCTTGTAGAT  
CAATTGGAAAAGGATGAAATTGAAGATGTTACCGATGAAATGCTGGATCGTTTATGATCAAGGATGGCAAAACAGTCGC  
TGTGTTATTCTACGATAATAACGACCGCAAATCACAAAAGTATTTAAATGAACTGGAAAACATTGATGATGAGTGTG  
ATCAACTGGGTATTGCGTTTTGTGAAAATTGATAATGATGAAGAAGCTAAAGAATACGGCATTGAGAAAAGTTCCAACC  
CTATTGTACTTCGAAAAGGGCATTCCAACCTACTACGAAGGCAATTTAGAAGAAGAAGAAAAGTTTTGGCATGGCT  
CAGGCACCAAACGGAAGTGACGAAATTGAAGACATCACAGATGAAATGCTCGATTTGATTATCGAGAAAATGCCGT  
ACGTCGCTGTTTTGTTCTACGATAAAGGACCAGAAAAGAGCCAAAAGATCTTAGCGGAGCTGGAGAACATTGACGAT  
GAGTGTGACCAAAATGACATTGCGTTTTGTAAGATCGATGACGATAAAGAAGCGAAGGAGTACGGTATTGAAACCGT  
TCCAACCATGGTATTCTTTGAAAAGGGCATCCCTCATATATATGAAGGTGATCTGATGAAAAGAAGAAGAACTATTAG  
GTTGGCTTTTACATCAAAAACGACACAGTGAATTTCCAGAGGTTACTGATGAAATGATGGACAAATTAATTGCTAAC  
ACCCCTTATTTAGCCGTCATTTTCTACGATAAAGAAGATAAACAAGACATAAGAATACTCAACGAACTGGAGAACAT  
TGATGATGAACTGGAAAAGGAAGGAATCGTAATTGTGAGGATGGATAATGATGCAGAAGCTAAAGAATACGGAATTG  
ATCATCTGCCAGCTTGGTGTATTTTGAAGAAAACATCCCTGCTATTTATGAGGGTGTCTTATGAATGAAGATGAA  
GTTTTGGAGTGGCTGATCGAGCAAAAAAATAGTGCAACTATCGAAGAAGTAACTGATGAAATTTGACTGACTTAAT  
TGAAGAGCATGAATATGTTGTGGTGTATTTTCAAGTGAAGTGTGAGGAGGGTGACGAATGTGACAACATTTTGGATG  
AATTAGAGAATATTGATGACGAATTGGATGAAACTGGTATAATCTTCGTCACAACTGAAGATATGTCTCTCGCTAAA  
AAGTACGGTATCAAGACTTTCCCGACGCTTGTTTTTCTTCAGAAAACGAAGGAACCACTGATTTATAAGGGAGACATCGA  
AGATGAAGATGAGGTACTGGCGTGGCTCACCGATGAAGACACACTTGAAATTCCTGGAAAAATTGAAGAAGTAAACT  
CAAGAATGCTGGAGAAAATACTAGAAGAAAATGATCACGTCGTTGTATTCTTCTATAAGGAAAATGATAAGAAA**TC**T  
CAAAAGATTCTCAGCGAGCTCGAAAATATTGATGATGAATGCGAAGAGAAGGACATTGACTTCGTTAAGACTTCCGA  
TGAAGGTGTAGATAAGGAATACGACTTGCCGGACTTGCCAGCTCTTGCTTTCTACAGACATAAGTTCCGGACGATCT  
ATGACGGTGTCTGATGCATGAAGAAGCAATTTTGA**A**AATGGGTATTAGA**A**CTCCATGACACCCAGCCAGATGTAATA  
GAGAACGTTGATAGGAAA**A**CTCTCAAAGACCTTATTGATGACGTTGAACATTTAGCTGTCTTTTTCTATAGTGAGGA  
CTGTGATACCTGCGACGACATTCTTGAGGAACTGGAAACCATTGATGATGACACGGACAAACACGGAATCCAGTTTG  
TTAAATCAAAAGATTCTAAACTGGCATCTGATATTGGTATTTTTAGCTTCCAGCTTTGGTTTTATTACGAAACCGGT  
GTGCCTATTATGTACGATGGGAATCTGTTGGATGAATCCGAGGTTTTGGAGTGGATGGTCAAACAAAAGGAAGACGA  
AAGTATTGAAGAAATAGACAGAGACAAATTTGTTCAAATATATCGAAACCAAGGAGTTTCTAGCTGTGGTATTTTACA  
AAGAAGAAGATCCTGGAAGCCCTAGAATTTCTCAGACACGTTGAATTGATTGACGATGAAGCGGCTGAATATGGAATT  
AAGATAGTGAATGCAGCGATCGATTAATGGCGAAAAAGTATGGATTCCGTAATCCTCCAGGCATAACATACTTTAG  
AAAGACAAAAACATAAACTATGATGGAGATATGGATGATGAGGAAGAAATATTAGACTGGTTAACCAATCCAGAGA  
ATATGGAGTTGACGGATCACATAGAAAAAGTCAACAGAAAAGATGTTCCAGAAGATACGACAAACATCAGACTACGTG  
GCTGTATTCTTTTACAGTAATGACTGCAAAACAGTCCCCAGAGTGTGGCGGAGATAGAACAATATCGATGATGACGC  
TGATGGCGCTGGTATAAAATTTCTGTAAGATAGATGATAGGCAGATGGCCAAAGAGTTCCGAGTATTTCGCGCTTCCCG  
CTGTATTGTTTTTCAAATTAGGTTCAAAGGACCCTGTATATATGCAGGAGACTTATATGATGAACAACAATTACTT  
AGTTGGCTACTTACTCAAAAGAATCCAGCTGGTGACGTTATAGAAGCGTTAGAAGGACAAGATTTAATCGATTTAAT  
ACAGGAATCAGGATCGGTAGCCGTTTATTTCTGGAACAAAACGTTATGTGAATTGTGTAATGCGAGAACGGCAAAAA  
AGCCAAAAAACGGGACAGAGATCATGAGGAAGAAGAGGGGACAGGAGCAAGAGGATTTCGCTCGATTGTGAACAGTGC  
GCTGGTATTTTGGAAAGAATTGGAAAACATTGATGATGACTGCGATAGACATGAAATAAAATTCGTCAAGACACAAGA  
TTACTCGATAGCGGAATCATACGGTGTGACAGATTTTCCGGTGTGTTTACTTTGAAAATAATATTCCCAACGTTT  
ATGAAGGCTCGTTAGGTGAGGAAGAAGAAGTACTCCAATGGCTGATTACACAAAAACAGAAGATCGCATTGAACTT  
ATCACACGTGTTATGCTAGAAAAAATGGTGAAGAAGAACTCAGTATTTGGCAGTTTACTTTTTATAAATTGAATTGTCA

TATTTGTGATCACATTCTTGAAGAATTGGAGAAGATTGATGATGAATGTGATGTATATGGCATCCACATGGTAAAGA  
TTCAAGATCCACAACCTGGCCAAGCGATATTCTATCAAGACCTTCCCTGCTATGGTATATTTTCAGAAACGGTAATCCA  
CTGCTGTTTTGAAGGTGACTTACAGAATGAAGACTCAATTTTGAATGGCTTATTGATGACGATAACCGGGAAGTACG  
TGATGAAATTGAATCTGTAAACGATAGAATGCTTGAGAGGCTATTGGTTGAATCGCATTACTAGCAGTCTTTTTCT  
ATGATGACGAAGATTGTCCTGAATGTCAAGATATTCTAGAAGAGCTAGAACAAATAGACGGCGAAGTTGATCAATTT  
GGTATTGATTTTTGTCAAAATTGCTAGCCCTGAAGCTGCAGCTGCTTATAATGTTGTCAATATACTTCACTCGTATA  
TTTCCGAAAGAAAGTGCCAATGTTGTACGACGGAGATTTGCACCAAGTTGACAGAGTCTTGCAGTGGTTGACATCTC  
AGGATGTTTTTGGAGATTAACAAACGAAATTGAGGAAGTCAACAGAAAAATGTTAGACAAATTACTTGAGGAGAACGAA  
TTTTCTAGCTGTTTACTTCTATGAAAAATCAGCAGAAAAGTCGCCAAGTTTTAGACAAATTGGAAAAATATTGATAGTGA  
GACTGACAACCTTAGATATTACGTTTTGTGAAAAATGCATGATCCACGGTATGCACGTAAATGGGGTGTCACTAAATTGC  
CAGCTATCGTGTACTTTAGGAAGCGATTCCCGAGTATATACAGAGGGTCTAAGAGTCTTGTAAAGTTTGATTCAATTC  
GGATCTGTAAACGAAGACACTTAA

>aly2627.8:A1459T

ATGGCTACTTATGACAATAAAGCTTGGCTCCTAAAGAATATTAGAGATGCCTTCATTGCGACTGATGATACAGGTTTT  
GTGTGAAACTGTAATGGCAGGGGAGAATTTTTTCAAAAATCTTCCAGTGTAGGGCTATGGAAGACAAGAAGCGCTTCA  
AAGAAGGTACTCTTAATCAGCCAAGTACAAGCAGGGGCCGCGAGTCCGGTACAGATGATGAGGATGATAGGGAAATT  
GTGACCCAGTTCGACCCATACCCAGATATGGAAGACAGCGACGAGGATGATCTGTGTGGGAGCTATATACGTGACGA  
GGAATTTGGAGTCAAAGGCACAGATCAAACACAGCACAAAGGCTAGACAAGAAGGAGCAGGCGTTGAAGAAGGCAG  
CTAAAATTAAGTGATAAAATGGGAGGACACATCGACACAGCTCACAAATGAGGAAGTTGAGGAAGCATTGCCCCAA  
TTGGAAGTAAAGAAGCTTCAAAAACAGAAATCATTACTAGCAGAACAGCTGGAAAAGTGTCCAGAACCTCCCCACCG  
GCAGTATTTAGAGTATGCCAAATTTGATGGCACTGCACAAATGAAAACACCAACTAAAATTTTCAAATTTTTATGA  
CAACACTTCCAGAAAAGCATCAGAATTATCCTTTGATTGTCTGTGTATTGCAAACCTCAAAAATCAAGGACTTGATT  
GGATTCATATGCTATAAGTACAGCATAGAACATCCAGATATAATCCTTGGATCAGTTCATGATTATGGTCTGTGTCT  
AGCAGAAGATGATGGAGAAGTTGACTGGGCATTTCCCTGCCTTGATGCGAATGAACCATGCTCGAAAATTTGGATTCC  
CGTGTCTAGGTCTAGTAGACCTTAAAACCAAAATAGCACTAAGCCAAGTCAACAACGCCCATACCAGATATTGAGTTG  
CCTTTTTACATTGGACCTCCTTTTTCAATTTCTTTCAAAAGCCCTCTGATTCTGGTCAAAGCCATGTAAATACTTCCAA  
ACATAGTGCAGGAGAGGGTGAAGCTTCAGAAAATTTTCAAGAAAGCTCCTTGATGAAGATGTCAAAGGTTCTCACAGT  
CTGGAGTTATTGCTGATGCGCCACAAGAGAAAAATATTAGAGTAAATTTATTGCATAAAAATGCGCGCAAACACACCT  
GTGCAACTTTGGTATTTCTTTGGATACAATAGAAATAGTGCCTTTTGGTCAAAAACATGCATTTCTGGTTCGAGGCC  
AAAATATTTTTCGACACAACATTAATTTAATAGCTTGGTGTGATGCTTGGAAAGAAAAGCAAGTGAAGTAAATTTTA  
GGATAGTGTATTACCTAGTACGACACAGCAATAAATGATCGGAGTAGTTTCAAGCAATACGAATTTCTTTTATGGC  
AACACTACATACAAATTAACGATTTTCGAGACCGACCATGATACTGCGAGAACAATAGTTGAAAAGGTAATTAACAAT  
ACTAGATTTACGGAACAGTCCATGTGCTGCTGAGTACAAGACTGCCAAAGAGAAGAAAAGTCAAACTAGACCGGATTT  
TCCATACAAAACATTGA

>aly7985.5:G916A

ATGTCATTCACAATACTCTGTACATTCGTACTTACTTTTTTACGTTGTGATATGGTTTTTTTTGACGCATTTTTTCAAAG  
CTGTATGCACTACCCCTATTATGCGTTTTATGGATGGAAGTGGATTAAGAGTGGGGATTCTAAACTTCTCGTGGACAA  
CCACGGCATTCAATAGATGCATATACAGGTGGAGCAAAAACCTCACTCGAGTGTCTCGAAAATGGTTCAACTTCGGC  
TACATGTTCCACCATTGGACTGTTTTCTACCTTTTGAATATGGACACTCGCGTCATTTATATTTGAACATTTCTATGA  
GACGATAGAACTCAACAGAGTTCAGAGGTAAAGGCTATGCTCCCTGGAGTTAACATACCTACTTCAAGACTTCTGGG  
TGTACTTCTGGCTATCGGATCCAGCAGTATATCCATGAGCTGGGGCATGCTGTAGCTGCAGCTCAAGAGGATGTT  
CAAGTAATTGCCGTTCGAGTTTACGCTTTCACGATTATACCTATAGCATTGTGCAATTTGAATACTGACCATCTAAA  
CAGTCTCGCTGTGACTAAAAGGCTGAAGATATACTGTGCTGGGGTCTGGCACAATATTGCTATGGCCTTCATAGCTC  
TATTACTTTTTTTTTGCTGCCCCATTCTATTCAAGTATTGCATATCAAACAGAAATTTGGAGTCAAGATTACGGGATTT  
ACTGATGATTTCCCTCTGAAAGATGTCCGTGGCTTAGAAAAGGGTGTAGTACTAATCAATGGTTGTGACAT  
TAAAAATGCTAATGATTTGGTCTTACTGTTTACATGTGCTCATGATCGGTATGGGATATGCACCAGCGCTGAATTTG  
TTGCTCAAAACGATGAAATAATGATGGAGACCATCAAAGAAAATGATGTAGTCAAGTGTGAGAAAGGATGACTTTC  
TACAGTTTTCTGCTTTGAATACATGGAGCCTAAAGTGGTTGTAGATTTAGTGTGTTGCCAGGCCAGTACTCTGTCTTAG  
ACCGAGAGATATGGTGA AAAAACA AACTGATAAAATGCACTGAAGCTGGAGGCTACGCTTGTCCACGAAGTATGCACT  
GTTTTAAAACCATCTTTAAAACAACACACATATTTGATGATTGTTGAAAAGGAAAAGATAATAATGCAGTATTGTATTTA  
GGGTTGCCATATGACATACAAAAACAGTATTTATTGATCAATATTTCCCCAGGAATGCCTTGTGGTCAATTTTTCTC  
TCCTTCCCAATTTGAAAAGCTTCTTAGATATATATTCATATTTTTCGTTGGGAATAGGGTTTTCTGAATGTCCTACCTT  
GCTACAAGACAGATGGTCAACACATAGCAAGGAATATGATAACAAGTAATTGCTAAATACTTGAATAAAAACGGTGTAT  
TTTTGTAACATTTTACTGTGTTTTACAGTAATTGTAGGAACAGGATTAACAGGGCCAATACTACTGTATTTATTTTA  
TAAGGCTATTTATGTAGATGATTAG

>aly925.10:G199C

CTTTTATTACAAACTCTACAGCACATATTGCTTTGGACAAACCAATATCATTCTTTCTGAACAAAAACTGCCGGTT  
CAAATTTGGATAGCTCAATAGTATCCATATCGACAATGTGAATTTTCTTGAAACCCATCAGAGCCAGGTCTTTGAGCA  
CCTCACAGCCGAGACCTCCAGCTCCGACAACCAAAACTTTGCAGGAATTGATGATGAAGTCCAAGATCTCGGCGGAC  
GGCTCGAAGTCAGGGTGACAAAAAGGACCAGGTCTTTCTAATAAACTTCTTATATAATGCCATCGTCTCTGCTGGTC  
TACTTCGCCAGCCATTGTATCATTGTACTGAAGCAGGGATGTTAACATGCCATTAGCCAGCGTCTCGCCACAATG  
GAGTCGAGACCACAAACCACAACATGGAAGTACGGTAAAATCCTTCATCCAACCTTTCAATGGAACAGTGGTGTGC  
AACAGCTTGACATCCAGGAACTCTTGAGTATTAGCAATAGTACATAAAGGAAAAGTTTTCTGTGGAGGATATAAAT  
CAAGGGTGCATTCTATACAGGCACTTAGTCTGGCAAATCACTCTTGCAATTGCCTTTGAATCCTTCAGTGCCCCCA  
TCTATTAAGGTATCACACTACTTTGGTCCAAGCTTCTTCAGAAGCGCACGCTGCTGCTATAGCTGCATTAGTGCTT  
GCTACAGCTGGTATAATATTCTTTAGAACACCTTGAGTCAGTCTGTATGTGACTGATGTGATCCCATATTTTCATAGC  
CCTCTCTTGTGCTTTCTCAAACACCCAAGCAACATGCCGAGGATCATCACCATCTAGCACAGTTCAGTTCACCCAG  
GATTTTCTTTACCCATTGAATTACCTTTCACATATTCAATACAATGTTCTGGAAGTCTGGACTTTTTCATCATATATG  
AGGAATCTTACACAGCTTGTATATATTGTTTGCAGGCTGAGTCTGAATCAATTTCCATAATACGAGTTGTATTA  
CTGCAGGCTGTACAGTCAGGACGCCTTTTCAGCATCAAATGTGTAAGTGTATACACCTTCTGCCATATTTAGTACCAT  
ATAGTTGTTTCATATTTACACAACAAGAGGAAGCTATCTTGAAGACCGATTTCATGTCTACATCGACATCTTCAGAAAA  
CTTTAGTTTAAACAGTAATTGTATTAGGTGTAGTAACATCGGCGACTAAAATTTCTGCGCCATTAATAAACCCAACT  
CAGTGATTTTCTTTTTTAAATTATCCCTTGTCTTCTTCAATACTCTTTACAGCTGACATATATAAAGTCTTGTTA  
CGACCATTAATTACGGTTGTAATACCATCCAATGGACTGTCTATGGTTTTCCATT

>aly998.8:G308A

CCTACACTAGCTATGGGTTTAAACATTGTCTAATTCTTTAAAAAACTATCGAGACCGCTGAGATCATTCTTCCATAA  
GTTATCTATTTTCTCTCGATGCTGCTTGGCCATTTCTCTTCTTATTGCACAATCCGAGATCAGCTTGCATTAGCG  
CCCACCTTCTAGCACGTTCTCTTTGTTTTCGATATGAGCTCGCTCTCAGCGCGAGACAGTGAGTTACTCAAAATGGCG  
ATTATTCGCAAATCACGTTTTCTCTTTGTTCTAGCATTTATCGATTTACATTTAACTTTACGGACCCAATTAGATAG  
GGACTCTGCTTTACTTTTCAAAAAGTCAACGACAGATTTTTCTTGAGCACTATAGCCCATCCATTTTGTAGTAAGCA  
GCGACCACGCCCCAGCGGCAACCAAGATGGCGGCCGTGGATGCAGACCCACGCGAAACGCAATGGGATTACAATTT  
GCTAAAAGGAGTTAA

>aly141.4:C104A

CTGATCTTTACACTCTGTTATATCAACTGGATCATTATTAGGAGTAGCATCAGGGATAGGGTCACCCACTTCCACAT  
TCCATTTACCTTCTCCTCCGAGCTTTCTTTAACTTTCCAGGATCTACGTAGCAATACTTGGGTGTCTACGTTGTAT  
TCTTCAACCATTTCTCTACCGTCTCAAACCTTGTAGTGAACCTTTTTGATTTTATCGTCTTCAAACAAGCTTTTTTC  
TGCGTTAAGCAGAGATTTGTACCAAATGGTATTTTTTATACATTTTTTGTCTCTGAATTATTACTACACAAAAAACTT  
TGCTTTTATTTTTCAGCACCAACTTTCTCAGCGTCGAAAGCTTCGATCAAACATGATTTTTCTTTTCATGACTACTACC  
AAAGTATTAATAATTATGAGTTGAGTAGACATTAGCTTGTCTACAGGCAGTCCCAGCCTTACAAGTTCAGGTATATG  
TAGTTTTTTAAATACTTTTTGTAGTTGTGCTCACCACAACACATTTTTCTTCATCATTTGCTTTGATTGAATAAG  
TTTCTATTGGATATGGCATATTTCTAATTCGCCATTCTAAGTTAATTCTTGTGTTACGTCTGGTTACAACAGGCTAT  
TGAGTTTTGCAATCATTTGGTATATCTTTGATAGTTTTGACTTTTTGCAATTCATTATACCATTCTTTTTCCATGTC  
CAATAATTGCTGGGGCTTCTTGTA

>aly275215.7:C925G

CATTGAAAAATGCGTGATGACGGTTAGATGGTGATCCCTTTTTGCGAGAGCTTCTAAAATGCGGCCATACATGGCAT  
GGTGGCTTTTGGTGTGGTGGGCAGAACGGCCAATATTTTTCGCCGCGTTTCGTGCGAGCGGCACAGAGCAGCACCACC  
CACAGAGCCCACGCCGCATCTGTGAAGGTATTTGTGACTTGTATTTGTATAGAATTTTGCCAAAATTACAGAAAT  
TGTATTAGTGAATCTTTCCCAGAGGTTTCATTGCTTGTCCGTAACCCATCATGTACGAAGGAATATAGGCAGTTCCAT  
CTGGGATTCCCAACTGTTTCGTTGACCCACGGCAACGGCAGCTTGTATAGAAGACCTACAATAGGCGCCTGGAACCTT  
TCGCCTAGTGAAGGAAACATTTCACTTCCAAACACCTCGACGATAACCAAATCAAAGATCCGGGTAGAGTTTATCAG  
GGCCTTAACAGCTGGCGTCCGAGACACCACGTGCAAGCGTGGACGCATTCTTTTCATGATAGTTTCCAAATTCGGTA  
CAAATGCCGGCTTGAAGGAGTTTTGTTGTGAAGTGAAGTGTAACTATTTTCAGGTATCGTTCCCGCTAAGCTTATT  
ACCTCCACGTTTCGCTGGTGGATTTTTCGCCGGCAACTTCTGCGTGTGTCCAGATGGAGTCCCCCAACTTCGACCAT  
AGCGGGTACTAATGGTTCGCACTTTCGTTAATACTGAAGTACTATTGATAACACTAAACTGTAATTTTTCGCTAGTA  
ATTCTAGTTTTGTGTCGGTACCAAAAAGTCCGTTCTGCAATAACATAAAGTCTTGTGTTGAGGTATCCAGTCCATAGT  
ATATACGTTTTTCAGGAACTGTTAAATTTCCGGGAAGATTTCGCTGGGTTCAATTTTTATTAATACAGTTTGTGGCAGTC  
CCGATATGGCGGAAAATATTTGCGACAGCTTGTGGGCTGGCATCGTCTCTATTCTAGACATAGAACCGAAGCTCCAG  
TAGATAAATCCATCGTGGGACTCGTCCAATAGACGTTTTCAATTTCTCGCATCGGTTAATAAATCTCTTAGCGCCTCT

CTCCACGCATCAGCCCCGCTCTCGTCGAATGATAGTGTCTGGCGACGCCCTGTCACTCATAGCTCGGCCGTTCAA  
AGCTTGATCCGCGTACAAGGGAATGGTCAGCATCGGTACACCGCAAGCCACCGCCTCTTGCGTGCCAAGTAGACCTC  
CGTGTGAAATGAACAGTCTGATGTTCCGGGTGGCAGTTTATGGAGAATGTATGTGGCCATAGCGGTAACAGCTATGCT  
AAGTAGAGCTATGTCTATGAGTAGGTATTGAGTAGTGGATAGATCTAGTGCTGGGGAACGTAGATGTGACGCTCCCT  
TGTGCCGAAGGATGTAATCTATCCAGTATACTCCTGTTTCTAAAGGTGGCATGGGCCGGTCAAGGAACCTTGTGCGCG  
AGTTTCAAAGCGTTTTCTTTATATTTAGGCAAAAGGTATACAGGTACCCCCGACCAGGCGAACCAGTACCTGAAG  
AAGACAGCAGGGAATCGTTGGATTGAGAAGGCACATGACCGGTTGAAGTGGCGCCGTTTAGGGGAGGCCTATGTCCA  
GTTGTAAACGTGCAAGA

>aly274.29:G397A

ATGGCTGCACTAAAACAACTAAGAACTTTAAAAATATTACCTGGTTATCGCCTAAATATCGTCCACATGTGATTTG  
TAAAAGACATTTAAACCTTCAAGAGTACCACAGCAAAGATTTGTTAAAGAAACATCAGGTTACTATTCAAACCTTCC  
GGCTTCTTGATGCCAGTTTGGATCCTAAATCCATATCAGATTTCAAAGCCAATGAGTATGTAGTGAAAGCTCAAATC  
TTAGCTGGTGGACGTGGCAAAGGTCACTTCGACAATGGTTTCAAAGGAGGTGTCCATTTAACTAAAGATCCAAACGA  
GATCTTAAAGTTTGTAGCAAAAAATATGATCGGTACAAAACCTGATCAGCAAGCAGACTCCACAAGACGGTATTCTGGTGG  
ACAAGGTGATGGTAGCTGAGAGTGTAAACATTGTGAGGGAACTTATTTTTAGTATTGTGATGGAGAGGAGTTATAAT  
GGTGCAGCTCTCGTGGCATCTCCGGCTGGTGGTATGGACATCGAGACAGTCTGAGAAGACTCCACACTTATTTAAA  
AACAGTCCCAATAGACATTATGAAGGTATAACAGATAGTGTGCTAAAGAAGTAGCAGAATTTCTGGAATTTAAAG  
GACCACTTGTAAATAAATGTGCTGAAGAAATCAAAAAATTATGGCAGTTATTCTTAAAGGTTGATGCAACACAACCTG  
GAAATAAATCCTTTGGTGGAGACAGATGATGGCAGAGTGGTAGCAGTTGATGCTAAAATCAACTTTGATGACAATGC  
TCAGTTTCCGCGAGAAGGATATCTTTGCCTTGGATGATCCTACTGGTACTGATCCTCGAGAGAGAGAGGCAGCTGCAC  
TAAATTTGTCAATTCATTGATATGGATGGAAGTATTGGTTGTATGGTGAATGGTGCAGGTTTAGCTATGGCCACTATG  
GACCTTATTGTACTTAGTGGTGGAAAGCCTGCTAATTTCTGGACCTTGGTGGTGGAGTGGGAAAAGCTCAGGTTTC  
AGCCGCATTAAGAATTTTGAATCTGATCCCAAAGTGAACAATTTTTCGTAATGTTTTTGCAGGTATAATAAAT  
GTGCAACTATTGCTGACGGAATTATTGCTGCTTGTAAAGGAAAGTCCCTCCAAAAGTCCGCTAGTCATAAGATTGGAA  
GGAAATAACTCTGCAACTGCAAAGAAAATTTTGAACAATCGGGCCTTCCCTTTACAATCATAAATGATGCAGATGA  
AGCTGCAAAAATATGCAGTGAATTAGCACAGAAGTCTTGA

>aly83.15:G8658A,T8657G

GGAAACCGGTCAACGCTTACGCATGAATGCATGTCCGTTGATCCACAAATGTTCCGGATCTTTTCAGCGCATCTGAAAA  
AATACAGATAACGTTTAGAATAACTATTAAAAAATCACGTATTTCTATTCTTCTGTTTGTTCATGTCTTATAAAAA  
AAACTATTGAACATAAACATCTCGATGACGCTTTTTCAGATCGAAGATCCAGGGTAGACCGGTTATTGCTGGATCCAG  
CAAAGTATGTCTCCACATTCATTTGTAATCATAGTATGACCGTGGACTTTAGGTAGTTGAATTTTTGTGATGCT  
GAGGGTGTGTAAGGATACTGCGTGGATGAATTTCTCTGCCCTTTCCACTGGATAGTACTCATCTTGGTCAATGAGGC  
TCACGTCACTTAGTTGTAACAATCCTTTCGCATGGAGTTATGAATTGGAGTATTACCTCAACTCCATTAATAATTAATG  
TCGAATCTCTTATGCTGTTCTGAAAGAGAGAAAGAATACCCCTCTTGAAGTTAAGCACCCAATCCTCTTCAGTTTC  
ATCCGGGCATATCTCTGAGATGATTCCATCATGGAACGCAAACGCTCTGAAAATCGTAGCGCACAGTTTGCAGGATA  
GACATGTATTTGTACCGATCAGTGCATTCCGCAAGATTTCTTTTCTTAACTAGAATAAGACTGGTGTTTTTCTGTCC  
TCTCACTGTGTAGTCGACATTGCATGAACCATGGATGTCTTGACGGAACACGCCAAAAATAAATAAATAATGTGAA  
CTTACTTTGTGCTTTCAGATTCATAGTTTGCGAATCAGTCTTATTGGGTTCCCTTATCAACACCAAGTCTGTATGA  
CAGTGGTCAATCGCACCAGAGTTTCTTCTGAGAATGGCTCGAATAGATGGCGCTCACGGCAGTTACCTCTTTGTAT  
ATGTGATGGTCCACTGTTATGCGACATTTGCTTTTCAGATTTGAGAACAGGCCAGGTTTGAATTTCTTGGTTACAG  
ATTCATGTCTGAGTGAAGTGAAGATCTGTCTAATGGTACTCAAGTCTGGGCAGCGCATCACCTGTAAATACGACGCT  
ATGCGGAGTTCCACGTCCACGCTGTGAGCACGGTATGTTTCGAGGAAGTATTCTCAGCATTATACTGATCGAAGAAC  
ACACTCTGTTTCATAGTTCCGTGAGAACATTCTGAAGTCCGGACTATCTTCCAGCTGCGGTACCGTGTACCAGGAGAG  
GAGGCCTTGGATCTCCACGCGAGAGGGCAGAGAGGACTGGGCTACGTTGTTTCAGGTGGCTCCATACGAAAGTTGCCA  
TTCTAACAAGTTTATGGATTCTCCAAACATATCGATGGTCAAGTTGAGCGACACAGATCTTGGTATGTATGAGTCCG  
GCGAGAAGATTACATTAGCTTTCGTAGTTACCACCTTTCCAGACAGTATCTCCAAAATCCTCAACTTGGGGTTTCAGAC  
GCTCCAACGAAGTATAAATTCATCATTGCCCTCAGCGCTCCAAAACGATATCTCATTACCAACACACTTAATCCCC  
AACTCTGCCATAGGAAACCGGTGCTTAAAGCGCATTGTTTTGTATCCAAGATCGTCAATTTCTCTCGCACTCATC  
AGCTTCTGTTGGTTGAACGGAACCGGAGTTTGTAAAGTTTTTTCGTTGATTTTATTCTTATTTAACGGTCCGTTAT  
TGCCAAAGAACCTTTTGAAGTATCTCTCGAAGCCTTTCGCCGCGAGCTTTAATCTGGGTGCTATTTTTCCCTTCAAAGT  
CCAGATTACCAGATTGGGTAAATTTATCCACTACAGTACCGGACATCTTAGTATCCACGTAGCTCGTGCCCATGAGA  
TTCAAGTTCAACGGTAAACCACAACCAGTTGGTACTGAAAACGTCGTGTGACGAATAGTGACGCTTTGTTGTATGA  
TATTTCTTAGCAGCAAATATCTCCTGTTTGTCCCTCGGGAGCGACAGATCGAGTCTCAGCAGGTTCAATCCGCGGAG  
GGACAGTTTAGCTTCCACCGCAGTGGCGGTGTACAGTCCGGCTGACACTCTGATGCCAGACGACGACAGCCCCCTG  
CAGTCACTCCCATAGTCTGCTATGTTTACTGCCACTGATAAGCAGCACAGAATTTGATACCAATAGCTCTATC



GTTGATGACCAGGTTTCATGCGTTTTGACAACCTTATACCCATGCACCATATCTTGCTGGTACGACCCTACGAGTGTGA  
AGGTCGGCTCGCCCTCGTACAAGGGCGTGTAAAGGGTGTAAATCCACGAACCTAGACCCATTACAGTCCCACCTTGTA  
GCCACGTTGTTGTGCGACGCTCTTGTGTTGAGAGCTCGCCGTCCAGATCACTGTTGTGTTTTATGTCCATCGCTTCTAA  
TTGCTGTTTTGAGATCAAAGATAGACTTAAGCCAGGGCAGTTTCATGAAAGGGTGTAGACAGATTGAAGTGTCCGTCCG  
TGTGCTTAAACACCACCGTAGCGGAGATCCAGCTCGCCCACTTGTGTTGGGAGCCGGGACGATGCATCAGACCTTACATC  
TCCAGTGTGTTCAAACCTCATGTATATATTTGATACCGACAGGCGTGTGTACATTCTCCACTTCGATGTCCATCGTAG  
CAAGATCGAAATTCGCTCACTCTTACTGAGTATCTGATTGTAGGAAGCCTTAAACGAATCTCTCTGTATCGAAATCG  
ATTGTTGCGTTTTCCATTGCTCGTTTTTTTACCTTGCACGTAATAATACTCAGTGTGACTAAGTGTGAGTTTGCAA  
TGGTACTGACAGTGTATGATGCCCCGTTTGTGAGTGAAGCCTTTGTCTTCTTTTTGTAGTTGTGAGTTGTGTTGATTG  
TCGCGGTCTTGTTCGGCCAGAACAAAGTCTACTTTGTTGTGCGAAAACCTCTTACGTTATTGTACACACTCATATTA  
GTGACGTGAACCTTTGTAATTGAACACACATCTCGGCCACGTGATATTACTTCTTGCATAGGGAGGTATCAAT  
CGCTCGTACTGATTTCGGAAGGTCCAGGTTCCGTTCCCGTGTATGGCCGTGAACCTTGTGAGTTCTTGGCGATCTTGT  
AAGCGAACATGTCCAGTTTCCGCGTACGTTGAACTTTGTTGCGTTGTGGAGATGGAATACTGTGGCTTGTTTTTACG  
TCCTTTCTAAAGGACGGATGGGCTAAAGCCAGCAGCACATCATGTGCGTTCCCATCGGGCAACGGCGGGCTATCCCA  
TCTCGCCCTAAGTTCCGCGGTTTCGATTCTCATCAGAACGTTCCATAGTAGATTTCGACGACCGTCCAGTAGACTGT  
CCTGTAGGTGGTACTGCCTGTACGCGAACGTACGTAATGGGTACCACACGTCTAGGACTATTTGCTGGGATTCT  
GTGTCCGCCTCCCAATTAACAATATTCTTGTTCAAATCGATCAAAGCTTGTGCTCCTAAGCTTCTCATAGAACAG  
CGTCTTCTGGAACCTTGTAGTAATTTTGAAGAAGTACCATCTGCTGTGTATATTTATATCGGACGTCAATCCAAGT  
CCAAGTTAGTGGACGGATGGGTGCATTTTCAAGTGCGAACCTTATAGTCTCTTATTGGTCCAAGTGAATTGTCTGTTAGA  
ATGGTGTTCAGTTTGTAGATATTCGTTTTCGTAATCTGAGTATTGGAGTTCCATAGATAAGTTTGTACATCACTGCCGG  
AGTCTTACGTACTGTCTTTGAGAGTTACGTCCATCAGTACTGTTATAGTGCGCCACCAACGCCCTCTGCAGCATG  
GAGAGCTCAGCGCAGGCGGTATCGTTCCCCCGGNNNNNNNNGCGGGTACGACAACCTCCAGGTACCGTTTACTTT  
GTAGTAGTATGTCTCGTTTACACGCGATCCATTTCTGTGACCGAAAGTAGACACGTAGTTAAAGTACGGTGTGTGAGT  
CAATTCATGAGTCTTTTCGTGGAAGAAGTCCATGATATTCCTCCAAATGGTCAACCAACCGCTTCCAGTATAGTGCA  
GCATTTTGAAGAACAGAGGCTCGATTGACTTTAATATATCCTGCCAATACTTCGCTAGTTCGCGTGGTTCGCGTTAACC  
CACGTCTCCTCCCAATAGTCCAAGAACCTCATATGTAATCCCTCACAAGGTGTCACTACTGTAAGATCATTGCTTC  
CAGTTTTTCCGAGACCAACTCCATGAAATCGGCTTCTAGAACCTTATTTCATCGACTCTAGGAAGTTTGCATACGCCA  
TTTTATGGTCTCCACAACGTAGGTACAGCTCTGCTTATTGATTGACTGGGATGTAGAGCCCATCATTCCCCACATATCG  
TTGACGAAACCCGGCAAGCTCTAAGTGGTTGCGAATTGCCATTTTCATCGAGAACATAGTACGTGAACCTCGACAAT  
ATCTTTGACATAGAAGTCTTCTTTCGTACGATCTGTTTGGAAATCTTTGGAACCTCATCCAGATCGTCTTTGATGA  
CATGGAGGTCTTCAAATCATCCAAGAAGTCCCTGACACGAGTTTTGCGTCTGCTCCAGATATTTCTTAGAGCGTGA  
TGAGCTTCCATAGGCGCTTCTTTGATTATGACTAACGTTTTCGTTGACTTGGGCGTATAGAAGTTTTAGAGTGCTAAC  
AGCTTGGCTCTTTATTTACCAGAAGATCTCCGGTCTCCAAACAACAGAGCTGGTTAGTAATCGGGAGTGGTTTTAAGC  
GGATGTAGGAAGCGAGATCGACTGTTGTTATTTTCGTATAATTCCTCCAAGCGTTCGAGTCTAGCGGACCGCGTGTG  
ACAATTTTGCCTATCATGTGGTATGATACGTCTTGTCTTAAACATAGACAACCTTGGGGAGTCTTGGGAAGTTCTCC  
CAGGCGTTCTGAATTCGCGGTACAGTTGCGTGAACCTGCTCTTGAACGGAATGAACCTTCTCCACCTTACTCCATAT  
AACACCCACAGCTTCCGCGTGTACTTCTTAATGTTGTTTATTATGTGCTTGTTCATTATGTCTTTGTATATCAATT  
CCTCATATTGCAGAGCGGTTCTGGCCAAACCAGTCACTTTCGCGTATAAGATCTCCTCTATCGCATCGAGAGCTTCT  
CCGATCAGGAAGTAATCGTACCACCACTTCAAGCGGACGTATGCTTTCGTTGTACTGCAAATGGCGGCAGTACATTAT  
TAATGTCCATATACGGTCTGATTTTATAATAATACGACCAGATGCTCTTGTGTTAACCAGCCACGTGTCCATGAAG  
TCGCGGACCGCTTGTATTCCGCGATCTCGCTGAAGTCCGGGGTTTCGATTGAAGGCGTGCATGACATCGGTAGCTT  
CTGTTCCGAGTAGCACTTCGCCTTTACGTGGGTGCAATATGAAGTTTTGTTTTGGTGTGCGGTGCCTCCTTGTGTA  
TCGATGTAGATCAGATTCCGCTTGGCGACCACTACCAGGTCTGATCGGCCCTTGTTCGTTGCTTTCCATGAGCACCGT  
GAAGTTGTTCTGTGCGTAATCTTTTCGTGACGACGAACGTGCCAGCCTCAGAGATGGTCAATACCCGCTTGTGCAAGG  
TGACCAGTGTACCTTGACCGTCACTATTGCCATACATACTATATCTCCTTGTGCAAATAAAGACATATCAGCCTTG  
TTCGTTGCTTTCCATGTGTACACAGAGAAGCAAGGCAACGGAGACACCTTATTCTGAAAGAACTTATCACATTG  
GGTGTCAATTAGCCGGGCCAGGGTCTGGGCGAGTTGCGTGGGTGGTCTGAGTTTGAACCGCCAGCCGTGGGCGAGTG  
TGCTCGCTGGGGCGTTCAAGGTACCGTTGGGTAGTTGCCACTCGTCTGATTGCTCGTTGTTGTATGTACCGAGTAAG  
CCGCCCAGGCTCGCTAGTACCAGCTGCACGCAGTGGTCCGGGATGTGCACGGGCACGTGCTGCTGCGCGCACAGCT  
CGAGGTAGGCGGCGCCAGCGCGCACGCCTCCACGCCGCGCGCACTCCGCGTGCAGCGGCAGCGCTCGATCTGT  
TATCCGAGAACCATTGCCTTGCAACTTGTATCAAACGTCTCGATGAACAGATCCATATTTCTTCAAGTTTCCGCGAGA  
TTCTTGTGTCAGTACTGCGCTTCCACTACGAAGACAACGTCCGAGGAGTTCCGAGGGTTCTGTAGCTCGAGGAACGA  
GCCTTCCCTCACTATGTGCGCTTGTGGGGTTGTACATCAATTTGGAAAGCGTCAAAGTGTGTTGGAATATCAACAGC  
ATTCTGTGAAAAGTTTATTGTTTACATAGAGGGCACGCGGTCTGTTTATATACGCCCGCCACCGTACACCACCACTG  
AGTATCGGCATATGGGCGGCGTGCATCGCGTACACGGCAGTAGCAGAACCCTCGCGGCGGGCGGGCCGGAACGG  
CAGCGAGGCCGCGAACCAGCGCGCCGAACACGTCCGCGCGGGACGACGTGTTTCGACTTACCAGGTCCGCCCTTCT



TTAACTGATGTCCCATTAAGTGATGTTATACTCACCGAACAGGTATTTTCGCAACCCTCTTCTTGGACAGTGTGAAGT  
CGTCATCCATGAGGATATGCAGAGTGACCGAGTTCTCCATCAGGTTGTGGAATATTGTTGAGTAGTCCAG

>aly3001.3:C1773T

TTCCTTTTGCATTTCATGTGTGCAGTGCCGTGGCTCATCTGAAGAGTCCCCGCAATCGTTGCTGCCATCGCAAAATCG  
GTTAATAGGAACGCATTTCTTATTACATACACTGATACTCTGATATGCGGCATCTCGTATCATTCCCATGTAAAACCTG  
GAAGTAATTCTGGCTCAGGAATGGCCTTCCCGAAGTTGGGACTGTCTTTCTGATATACATTCTTCGGGTGATCGGTA  
ACGAGGTGCGCAATCAGTTAGTTTGGATCAGGGCGATGACACATATTCCTATTCCGAGGGCAGTGTTCGCAAAACCTGC  
ACTAAATCACCATGGATGCCGCCAGCTGCTGTGATTGTGAGGAGACAGACGTAAGGAACCTAAGTCTCCCGAGGCCT  
GTGCAGTTCCTAACTCGTACGTACGCCCGATGTGCCATAGTAGGTTTTGTTACAGCCTGATGGCGGAGTACCTCCAT  
AACGAACTGTAGCGTATTCTTTCTCAAAACCTTATAAGCCATTGAAAATCAAAATTATAATTGTTCTGTTCTCTTT  
GACAAGTGAACAACCTAATTATGAGGGTTATGGATTTCTGTTTCGCTGTAATATATAGATGGTCCCCAGGAAGTGCC  
ACACCAGGATCCTCAACTTGAGGACGGCTAGCTTCTGGATCTGCATGTAGCCGTCGGACACCCGCTTTCGGTGA  
AGGAGGTAAACCGACCAAGAGTAAAATATCGAAAAGGATCTCCACTTCTAATTGAAAACCATGCAACGATTGCGAC  
GTGGCCGGCTGTAAAACGTTTCCAAAAGGCGACGTGCTGAATTCCTAACAACCTCCGGACCGCTTGAAATCGCTTC  
TGGCACAGAGACGCCTCCTCCGAGAATCTCAAGATAACCGGATCTCGCGTTGTGTAACCATCGTAAACTGTCACGT  
AATCCTGTACCTCGTGCAGTCTGCCAAAACCTCAACTCCCTCCCATTATTCCCTCTCTCTTGTTCGAGGCAGCG  
TACAAAGCTTTTTGACTCCGTATCGAAATTAGCTGACCGTTAGGTTGCTTACCACGATCAAGGCGTGTTCCTCCCTG  
AGGCACGTGCTGTTGTCGTACCGCATAGTAACAAGTTAGGTTCTCGGATACACACCGGGGAAGTTGGGAGACTGTA  
ACCTACAGTTTTTACGATCGCAGTCTGTAAGATCCGTGAGCAATAAGTCCCAGAGATCAAATCCCCAAGGTAATAC  
TCTGGAGTTTTTGTGCGCTTCGCTACACTCGTATCTTCTCCGCGTGATATGTTTACGGGATATGGCAGCGGCCTCAG  
TTTGAAAAGGGTCTGTTTCAAGATATCGCTGCAGCCCGGCGAAATTCTCATCGGTCCGTCCCATATATTCAAATGG  
CTGCCACAGTACTCATCTTCCGGTAAGTTAGGGTTTCAAGTGCCTTTGTGACGTAGAAGTTCAGTACCGAGAACCACAC  
TCGAAATCGTGGTGTGAGAATTGCCTTCCGGTAAATGATATCCGTCTGATGGTCCCAGAGGTGTGCATACCCTGCA  
TATGGTAAAGGCATGTGGTGTTCGGTGGTAGGGAATGCTGAGGATGTTCTAGTATCCCACGGCCGGTCCCTCTGATC  
CAAACTCACAAGCACGTTTATTCTTCGCGTATGTGCGGGATTGCTGATCGACGAATCGGACTTAAGCGCGGTGCCT  
TGTGTGAGCTTCAATTCTAGTGTCAAGGAGTCCCCTTTAGATAAGAAGCTTTTCAAGTACGGGCGCAGGCTCTGGATTT  
CTGAGCAAAGCATGCTCGCAGGTACGAGGCGCCCTTTGCGCGCAGAACCTCGCGACGAGCGTGGCATTGCTTGGCG  
GCCGACCGACGATGACTGATTGCGGTGAAGTTGCTCTCGACATTTGCACTGAACGTTCTTTGTGCTAATGTTCTCT  
GTTCTCTCTCTCCATATAGAAATACATCCCCTTGGCGATGAAAAGTTATAGGCGGATCTGGAGGCGCTTCTGGGAA  
AGACCGGATACGAATCTCCTCGAACAAGGTCCTCGGCCACCGGCTCACCATCTTGATGAAGTCCACAAACTCGT  
AAAGTGCTTTGAAGAATACGGGCTGCATAAACAATCCCTAGGTACACCAGGCCCTTGTCTTCCAAGGCCTGTGCG  
AAGATCCTTACAGCCGAGTGGGATCACCTCCACACCGGAACCACGGTGAATGTGCAGAATGGACGGATCTGCAGAG  
TCTGCCCCGCTGCGTACGCCCCACACCCTTAATCGTACCACCTCTCCACATTCGCTCGAAACGATATGTGCAAA  
GAATCAGACATTGGTGATATAGCTGATAATCTCAACTCTCCACTAGGCCCATACACCCGATGTGAACCTTTCACAAAC  
CGCTTCCAGTCTTACGAACTCAACCGACGCTTTCGAAGCCGAAGGATCGAAAGTATCGACAGCCGTATGTTTACAA  
CGTCAAACCTCAATTACGCAACCGGTGATGATGATGTAACCTCGTAGTCACCGACATCACTGTTTATGAGGGGGT  
AGGACAAATAAATATTGGTGACAGCCCCCAGCATAACTGCTATACGATTCTGTGCTCCTGCACATGTGCCTTAGAT  
CTGGGGCCACTGTGATGTTGTTTAGTAACGTGAAGTTGTCCAAGTCAAGTCCCTTGTGATGATACTACCCTGGATTTGG  
AGATAAAGGTATCGCCAGGTGAAGGATCCACTAACCATGGTTCGATGTTTCGCACCGTTCCTTCTAGATAAATTCTAGC  
CATGTTATATAATATGATCCACTTTCTACAGCTATCAGTTCCTGACAAGGACCTTGGCCAGTCAAGGTCAAACG  
GTCTGCTGAGGGAGCTGGCGCCAGGACGTGTGCGCAAGCTGGTCCACTTCTTGGCCCAACCTTTCAGAGAATACTT  
CCACTACTTCATCTCCACAGCGCACGCAGCGAGCACAGAGAGCGCGAGCAGCGCGGCCGATAGTGCAGCGGGTACG  
CGCAGCAGCGCCGAGCACTGCGAGAGGCGCTCGTCTGCGCGCGCGGCACTGCGCCACGCGCTCGCACACAGCGC  
CGGCGCGATGCACGCGTCCAGCGACTCGCAGCGGTGCGCGCACTCGCCGACAGCGCGAACACGCGCCCGCGATCGC  
TCGCGTGTTCAGCAAATCACTTCTTTTTTTCATCAAAAATAGCCGTATCTGAGGAGAGGCTCTTGTGATCTTTGTTGAAG  
TGCAGAGCGGCGCCGGCGACAAGACCTTGTGCTGCAAT

>aly378.19:G1099C

ATGCCAAGGAGACGAAACGGTGAGATACCCTTGGCCGACGGATGGGATTATGCGAGGGACTTTGACGGAAAGCTCTA  
TTTTATCGACCACAACAGTAGAAAAACGACGTGGATCGACCCGCGAGACAGATACACAAAGCCTCAGACGTTTCGCGG  
ACTGCATCGGCAATGAGTTGCCACTGGGTTGGGAGGAAGCCTACGATCCGCGAGATTGGGCCGTATTATATCAATCAT  
GTCAATCAGGTGACGCAGTTGGAGGATCCTCGGCTAGAATGGCTGAGCATCCAAGAGGCGATGCTGAGAGACTACCT  
CCACTGTCACAGGAGGCTCTCGAGGCAAAGCGGGAGATGTACGATGTGAAGAAGCAGAGGCTGTGTTTGGCTCAGG  
ACGAGTACAAACACCTCAACAACGCTCTGTCTACCCTTGGCGGCTCTAGAACGAGCTTATGTTTCGTGACGACGCTCG  
ATGACGACCACGTGACGACGTCACGACACGACCCGGAGTTATTACGAGCGGAAGTACGCGAGGCGAGGGGTGCTGT  
CGCGCAGCTGAGGAAGGAGCTGCGGCAAGCGAGAGCCGAAGTGGCTAGCGCGAGACGAGGCGTGGATACTCTTGTCTG

AAGTGGAAACAAAAATTAACGCACAGCAAGGATGTTACAACATCACCGAAGCGCAGGCGATAATGACCGAGCTGAAG  
AACATCCAGAAATCTCTTACCTCGGGAGAAAAGGAGAGGGCAGACCTCATGCAGTCGTTGGCTAAGCTCAAGGACGA  
CCTCACGAGGCTGCAACTGGGCGACGCCTCACCCGACCTCTCAACACTCAGTCTTCTCAGGAGAACTAAGCACTG  
CCTCCCAAACCGACCTATGTGCCGACTTAGTACCAATTGGAACAAGGCTGGCAGAAATGGCGCGGGTTTCGCTACAA  
TACGACGAGGCCAGGAAGAGGATACAGCAAATCCAACAGCAGTTAGCAGACCTGGAGGACAAGGTCCAGCCAGGACA  
GGCGGAGTCCGACAAGGACCCCTACTGCTCTTTCAAGAAAAGGAGCAATTGCTCCGAGAGCTGAGGAGTATAACTC  
CGAGGACACGGTCCAAGCAAAGATGAGCGACATTCAATCGGAATGCAAGAGATTAGAGCAGGACTTGAAGAATGCA  
TTCGAAATGTGCAACAAGTGTATAGCGGATAGATTGAGGCTACATGAGGAGAAGCAACTGCTTCTACAGCAGTTGAA  
GGACGCGTTAACATCGATGACGACGTTGGAGGGTCAGCTGAAGACGTTGTGTCAGCGAGTACGTTGTGCGTTTCCAGCA  
GTTTCGAGCTTAGGGTCCCTTTTCGACGGCGAGTAGTAAAGGGTCTTTGAGTTTCGGGGATTAGCTTCAAGGACATCTAC  
GGCGGTCCGAGATAGCCAGTTTCTGTTTCAAGCTGATAAGCCTATAGATATGGTCGATCTGCATCGAAGAGTTGAAAG  
ATTACTCCGAGGACAGATTACAACCGGATAGTGCAGCGCTGGCACCAGTAGCTCCCCATCCGAGCTTTCGTTGT  
CACCCAGGAGCAGTCTATCATCAGCGAGTCCACCACCACCTCCTTCGTATAATCAGGTGGAAGACAAAGGCGA  
CAGCAGAGGGAGTTGGAAGAGAACTAGCAGAAATGAGAATAGTACCAGTCCAATTACAAGGCCAGGACGGCCTTG  
CGAGCCGCTATCTCCTATATCTGAAACACCACCGCCACCGCTCTCGCCTAGAACTCCCTCATCTAGTGGTACAAATA  
CTAGATCAGTGTGACGCGCAGTGTAGCGACGAGTGGTGGCGGGGGACTCCGGTGTGTTTCGAGGCTGCGCAGGCGGCT  
GATGCTAACGCCGACATATATAATATTATACAACAATATAATAAAAAATTTGGATCTATTCCAGGGTTGTGCTCAAGT  
GAGTTTGGCGGATTTTCGACCCGGACACGGTGTACAGAAATGGTACAACGTGCTGAGCTTTCAGATGTATGAAAAGGG  
ATGAAAGTTCCGACGAGTCCACGGTCAATCGTTCGACACTTCCACCCTCACGAGGAATAGAGGTCCAGAGAGTATG  
ACGGGGGCTGAATGCAACGTGGACTGTGTGGACAACCTCCGATTCCGATGATGACGAAACCAGGGAACCACTTAATCA  
GATAGTTGAAGAGGATTCTTTCGAAGATTACATCCCAGAAGAGGAGTTGGCTCTGGAGGAGGAGTATCTCCATCCGT  
CCACGGCCGAGAAGGAAACCAACACCGAGTGAACCTTCTGTCCGAGGGCGCGAGACAACCTGCACAGACGGAAAAGC  
CAACAAGTAAGCGCCGATACCGAGGAGGCGCCAGCGACCATCAAACGTTTCTCAAACCTTCTCGCCGCAACCGCAGAG  
CACCGTCAAGGGGCAATACATTTGCAGGCTAAACCGATCGGAGTCCGACTCGTGGATGTGCGTGGGCGCGCGGGCGGG  
CCGCGCCCGCGGGCATTCCCTTCGACAGGACGCTGCGGGAGCGGAGGTGCTCAGATGGGGTAGAGTGCAGGCGGG  
GCAGCGTGTGTCGCGGGTGGCTCGACCAAGACTCGAACCAGCGCGCACGTCTCTCGACCTGACCCTAGACCTCCGCGC  
CCAGCACTCTCGTTTGGCGGATCTGAGGCATGAAATAACACATCTACAGCAGTTGAAGAAAACGCCTAGAAGAAGCGT  
GTGCCCGGGGCGACCCAGCGGTTGCAGCGTGGTGGCTGAAGACGAGACCCTTCGTAGACTCATCTCCACCCCGGTG  
GAGGTGCGGGGACCCGCTGGCTCGGCTGCTACACCGCACTGCGGGGAGATCTACCGGCTGAGGAGGTTCCCGCCA  
GGGTGGAAGGAAACCGGACTGGTCAAGTTCAAAGAAAAGATGGCGTTCTTCACTCGCACAAGCAACCGTGCCTG  
TACTACTCGACGAGGAGACATTCTCTCGAAGACGATTGGGAGGAGGAATTAGAAGAGCGGAGGACACCGGACGGT  
AGATCTTCCAAGACCTCGTACGAGCTTAAACGGGAGGCGACTCAGAATCAGGAGAAAAGCGATAGCCAGGTATCGA  
ATGCAAGAACCATGTCTAAACCACAAAGATGAGATGTACAAACAAACGGACGGAACGGAGGAAGCTAAGACTGAGG  
ATGGTAGGTTTGAATTTGTGTCGACAGAGTTTTAGGTGTCCAAGTTTGA

>aly2284.30:399A(not\_T)

TTATTTGTTTCTGATATGCATGCTATTATTTCTAACATAGGGATTTTGGAGAATCCTTGGTGTAGTTTTCCATCACCC  
TCAGTAATAATTCATCAAATAATTTTCTAAATCCTTGTCTTCTTCTTTTCCACTTCAGCATCTTTTTGTAAATTA  
TATATCATGAGAATCAGGTCTTCTCGAGATTTGCCATCGAACTGTTGTATCACTGTTTTAGGTATGCTGTTATAAGC  
TGGGTTGATGGAGTCTTCTCAACTATGTTTTCTTCCCAACAATAATACGCTCCTCTAAGAGTTTTCTTAGGTTTAC  
TATTACCACCAAAATTTTTGAAAACTTTGGGCTCGTTTTTCTTTCAAGGAGCTTGGGCTGTCTAGTTTTCTTATTT  
CTTTTCGAGACTTGAAGATTTCTCCCTATCAATCATTGTTTGCATTACAGATTTACGATGAGAGTATAGTTTTCTGAGA  
CCATTCATCATCTTTATCTATAGCTTCTACAGGTAGTTGTGGAGCAGTGAATGTGTCAAGGCTAAGTCCGACCGGGG  
GTTTTGGTGGGGCAGGTTTGTCTGTACTTAATAAGTTATTGTAAGTATACCTCCTTAATATTTACCCCCACCAAGG  
TTTTCAAGAGATGTATTGACCGGTGATGGAGTGTATTTGACTCCTCTAGGCACTGCCACATTGACATTAAGGGAAC  
ACCTGAACTTTTTATGGGATAGGTATCAAAGCAAATTCATCTTCATCCTCACTGATCACACCTGGATCTGCTTCTC  
CTGGTAATCTTTTGGGTGTAGAATGTTCTGGTGTAGATAGAGCTGAACTTTTAGATTTCCAATACTCCCCTTAA  
GAGGATGAGTCACTCTTTTTATCTTTTTACTGAGGTTAATCTTAGAGCCTAGGTTTTTAGCGAACTTTTTAATACC  
TTTGGCTTTTTCTAGACTTCCAATACTCATAAGGCTGCCGCTACGTTTTGAGCGATGCTCGATAGAGAAGACTTAT  
GTTTTCTTTCTTGCTAAGGTCAATTAAGCTTCTTCTTTTACGGTAAAGCCGATTTTAACCTTCAATTTCTCCTCTA  
TTCTTGTCATTTTCTTTACCTTGTTTACCACGCAGAGTGTATAACAGATTTCTTGGGCGTTTCGTATAACATCGAGGTC  
TTTTAACGGAATCGATACTTGACCTAATAAATGGTCTTTTACAAAGTCTTCATCGTAAACCTTAAGGACAATCTCAG  
CTGTATTACCTTGAGAAGGAATGCGTAATTCGCATTCCTCCAGCCATTCAACATTCTCGGTGCGTTTTGTGTTTTACG  
GATGTCTGAAATTTTTCTTTGCGGAGGGCGATTGTAACAAAACAGTTATTTGTACCGTTTTTGCCTTTGATCAGCAG  
TCCCCGAGCTCTTTGGACGGTAACTTGTACGTGAGTTGGATCCCACAT

>aly18312.8:A619C,G620A

ATGAAGAACTAAAAGGCGCCCCGGTAACTTCCGAAAATTGAGATTCCGAAGAGGACCTGAATCCGGAAGCGCACAA  
GAAATCCTTGGAGAAGTTAAAGAAAAGTATCCTGACTTTTATACCTTTTTGGAAGAAAACGATGAGAATTTACTGA  
ACTTTGGTGTGGATTGAGACGAGGAGGGATCGGATAAGGAAGATGAAGATAATACGTTACACACGCCTGGTCTCTG  
CAAGCGGACAGTGATGAAAGTGACTTTGAGGATGAAGATGCTAAGACAGTGCAAGGCAAATACACTCAAATGGT  
GTCCCAATGGCAAGCAGAGCTGCAAACAGGATAAGATAAAGCTCACAACGTTGACAACGTTATTAAAGCTTTCA  
ATGCTGCCATGTTGCGGGCCACTAGTGATGATGGGACATCACAGGCGGAACTTAAAGTAGAGGGTTCTTCTGTCTTC  
AATGCAGTAATACAAATGAGTGTGTTTGTATTTACCAAACGCCATAAAGAAGTACTTAGGCATGGAACAATCTGGTAA  
AGATCCGCAAAGTGCAAGCATTATCAAGATCAAAGGCCCTCTGGTGGCTTATCTCAAAGATCTGTTGAAGCTTC  
TCAGTGGAGTTACATCTGAGAACATATTGACGGTGCTCCTGAAACATTTGCATCAGATGTGTGTGTATGTTGCTTGT  
TTCCAGAGAATATCTAAACATGCTCTTAAAAGACTGATTACTCTTTGGAGCACAGGAGAGGAAACAGTAAGAGTATT  
GGCATTCTCTGTATACTGAGAATAACAAGGAATCAACAGACTGCCCTATTGGATCTTGTCTGAAGGCTATGTATA  
TGACTTATGTGAAGAATTGCAAGTTTGTAAAGCCCAACAACATGGCCTGGCATCAACTTCATGCGACGCTCCTTGGTG  
GAGATGTTGAGTTTGGATCTAAATGTGTCTACCGTCATGTCTTTTTGTACATACGGCAGCTAGCTATACTCTTGAG  
GAATGCCATAGTTGTGCAAAAAGTAGAAAACAGGCAAGCTGTTTACAACCTGGCAATGTGTAAACTCACTACATTTGT  
GGGCGGATTTGATATCAGCTACTTCAAATAAACACAGTTGCAACCATTGCTCTATCCTTTGGTGTATGGTTATCACA  
AATACTATTAAATTGGTTCCTACACACCAGTACTATCCATTGAGGTTCCATTGTGTTGAAATACTTATCAATTTGTC  
AAAGGAAACCAATACCTTCATACCAATTTTACCATATCTTGTGGAGGTGCTGACTACATATGATTTTAAATAAAAAGC  
ACAAAAAAGTGTCAATGAAACCACTCGACTTTTCTGCATATTGAGATGTGCAAAGTCCCAAATGATGGAAAATGGA  
TTCAAAGATGCCGTATCGAAAAGTTGTATGGTCTTTTTATTGGAACATACTGCAAATGAATCACATTCCATTGCCTT  
CCCAGACACATCTCTACTAGCTATAATTCAGATCAAACAGTTTCTGAAAACCTTGTTGAGTTTCTAATTATACAAAA  
AAATACGTCAACTGCTGGAAGAGATTGAAGAGAATGCGAAGTTTATTGACAAAGAGAGAGCTAAGATAAGTTTTTTCG  
CTTAATGACGAGAAAATGGTAAAAGCATGGGAAACAAGCATAAAGACTAAAGGTACTCCATTACTCACCTTCTTCGA  
AAACTGGAATAAGATTAACAAGATTCAAAGCGCAAGAAGGTATCAAAGAATGATGAAATCGCAGGAGCACTGCCAA  
TAATCAAGAGACCTAAGATTAATGAGGAGAAAAGTTAATGACAAAGCTGAAAAGAAAAGGTCTTATGGTTCTGTTCCCA  
TCAGATAGTGAGGATGAGAATGTTGATTTTAAAATCGATGAACAACCTGAAGAACCACAAAAAAGTGAAAAAACT  
TAAGAAGAAAAGTTAAAAGCAAAGGTAAAGAAGACGACACCCGAATTAGACAACGTACCTGATAAAGATGATGTTG  
TTAAAGATTTTAGTGTCACTGATTGGTAA

>aly420.27:G308A

ATGATTGGTGTGAGAATGAATACATTTAACGATAACTCGGGTGAACCGGAGCAAGATGCTAACTCGGCTCTTACTGA  
GCTGGATAAAGGTCTAAGATCAGGAAAAGTTGGTGAACAATGTGAAGCTATTGTCCGCTTCCCTCGTCTCTTTGAAA  
AGTACCCATTCCAATATTGATCAACTCATCTTCTCAAAGTGGCTGATATTTCCGTATGGGGAACAACCTTCTTG  
CGACTGTGGGTGCTAAGGGTCTGCCAGCAAAGTGAGAAGCATCTGGACAAGATTTTGAATGTAGACGAGTTTCTGAG  
AAGGAATGTCCATCACGCTATCCGACAGAGGGCTGGACAGCCATGATAACGTAGAAGTTGAAGCTGCCATCTATGCCA  
CTACGAGATTTGCTGCTCATTCCAATACATTTGCAGTAGCAATGTGCAACAAGCTATCTGATATGGTGGAGTGTGAG  
AGCACCGGCGCCGAGCGCAGATCCAAGCTGGTTCTGTCTTTAAGGACAGTACATGGTGGAGCTGTTCTGTGCTGAAGG  
CGTTCTGAAGTTACTGCGGTGCTCCTGGAGCGGTTCCCATCATCCAGTTCGGTTCCGCTGCCATCACAGCACTCA  
CTGCGATCGCCGCTGACACTGTGGTCCATGTTCTGATCAGGTGGAAGTCTTCTAAGCATAGCGATGAACGACGCT  
CGCTCTGCAGTCAGACGAGCGGCACTACTAGGGCTGAAGAAGTTGGCCGAGCATGCAGCTCTCTGGCCAGCTGAGTG  
CATCCAAGACCTGGTGCAGCGCCACCAGATAACCAGGATCCTGAACATACTATGCTCTGCTTGAAGTTATGCAGA  
TCCTAGTCCGCTGCCAGCGATATGCGCAGCAGCCGGCAGCCCCGGCGCGGGGAGCCGTCCGCCCTGCGGCAGTTC  
TGCGCGGACGCGGCGCTCAGCCTCGACCTGGCGCAGGCCGCCACGGGGGCGGGGGCGCTCACCGCCATCGTGGTGCA  
CTGTTATGAAGAGAACTTACCAGTGAAGGATCGGATCTCATGCTGGCCCTGGAGTCTTGGTTCATCGCTACTGGAA  
TGCCCAATGTTGAGAACGGTATCAAGCCGTTGAGAGTGGTCTCAGATGTCTGGTGCAGGCTAAGCGCGGTACAGCCA  
GCGTTGTTGCGGCGCGCACGGCGGGCGTGGGCGGGCAGCTGGGCGCGCAGGCCGGCTCTGACGCGTGTGCGCG  
CACCGCGCTGCTGGAGGCGCTGGCTGCGCTGGGCGGGCGCGCACGCTGCGCCCGCGCGGGCCCGCTTGCACGCTGCAC  
TTGACGCTGCCAGGAGCGTGCAGGCGGCGCGCTGA

>aly1139.19:T562A

ATGGCATCGGCAGCTGCTAAAGCGGTGGGCGTAGCGAGAGATATATCACCGTTGTATTACAGAATTTCTCTCCAAGTT  
TCCTCAGAATTTACATTTCTGTTTTCGCTTACGGGTGAGCTGTCAAACCGCAGATAGGTAACCAAAAAAAGCACAA  
TGATTGATCTGATCTACTGCGTGGACAATTCGTACAGATGGCACGGCGCTAACATCGAGATGAATCCATCGCATTAC  
TCTGCTCTGCGCTACTTGGGCAAGGGATTTGTTGCAAGATTCCAGGAGAAATGGGGCGCCAAAGTGTACTTTAACAC  
TCTAGTGGAGCTTAAAGAAGAGAACGTTACCATCAAGTATGGTGTAGTATCCCAAAAAGATCTGGTTGCAGATCTTC  
TAGACTGGAATGAATTATACTTAGCGGGGAGACTTCATAAGCCGGTTGAAATCATCAAACAGACAAACAGCTCACAG  
CTTCAGAGTGCCTGCAATCTAATCTAAGGTCTGCCGTTTACTACTGCACTCCTTATATTACCCGAAACCTTTTTCAGA  
GTATGATTTTTACTTTGCAATACTAATTTGAGCTATGCTGGTGAATTTTGAATGACATTTGGGGAGAACAAAAATA

AAGTCAGGAATATAGTCCAACCACAGCTACTTAATTTTTCGCGAGTTGTATAGGCCCATCTTGCAGCATTTCATGCC  
TATGTAGACTTCCCAACAGGAGATGCTCAGTGCCATCAAGATTTGCACCCTGAAACTAAGCTACACCACCTAATGCA  
GTTGCCAATGGTTCCCTCAACAAAGAATCGTCAAGTTCTGGAACCATGGTGGCCCCCAGCAGGATATGGAGGATGTCC  
TACGAGCAGTTGCATATGATATAGATTGTTCTGTTATTCTAAGACAAATTTCTTAAAGACCTGGTTTTGGCAATCCAGT  
GTGAGACAATCATTAAAAGGCATCCCAACTGCCGGAATGCTAAAATCTATTTCGCTATAGTGCTAAAAAATTGCCAA  
GATGTTCTAA

>aly85.28:C176T

TCTTTGTCTTGCAATATCTCTTGGATGAGACGTAATCTCACTCGCACAACTTTTCATACTCTGAAAGGGGAACAGTTT  
ACAAAACCTTTGAAGTGAAGTCTGCATCCAAACACAGCTCTTTCTTATATTTACAATGGTCCCACAGTCTCGTGTGT  
GGCTGAATTGGTGCAGATGCCCTTACCATACTCAAAAATAATCTTCCATGCCATCATATTCACATTTTCATCATT  
TTCATTATTAATAAAGCTTTCATCAGCGTGCAGGGGCCCTAATTTGTATAATTTTCATATTTCAACAGAGGTTTATA  
GTGATAGAAGTTGCCTGGCATCGCATTGAGTACCTCACCGAGAAATGTTGTTCCGGATCGCCAAGTCGAGATAATGA  
GACTCCTCAGTGGCTTACCACCTGATTCCAGGAGCAAGTCTTCCAGTTGGTGCACGCCAGAATAACTAAAGTTATAA  
TTCGATAAGTCAAACCTTAATTTTGGACCTTGTTTTTTCTAATATTTTCTCTATATTTGGCGACCCATCATACTGATT  
AGTTGGTATTGGCTGAATTATGCTGTCTCCATCTTTCGACCTTTAAAAAATTCCTGATATTCCTGCGGCTTTCTG  
GGGACCGGACGGTAACTTGTGTTATCTGTATATCGACTTCCAGCAAGAATAAGGAGAACACTCAGACCGAAAGCGATA  
CATATTTGAATAAAAAGTTAACTCGCCGCAACATATTAAGCGATTTGGGTATTCTTCTAACAACCGACCGGCAGCTACA  
TAATCACTGATCATATCAGCACACAGAAGTTCCGGCTTCCAGCAGTCTGGGGCTGGCTGGCAGAAGTTACGGTGTG  
CCTGGACTGCATCACTCCTCGCGGATCTCGAATTAAGAAGTACCCTTTACATTAAGCCTGTATTTCTCCACATAG  
TTGAAGTTCAACACGTTCTTCCACCTGAAGGGCACGTCTCTTGGATCCGGAAGGTTGAGCTGACGCCGGCCACCTC  
GACGTTGGTGTGCGAGTGCAGGAACCTCATCGATAGATGGCGTAACGCTCAACCCGAGGAACCTTGAGGAGCCTGTGCG  
TTGTTGTGTTCCGATTTAGTGCCAGCTCTTCGTAGCGCAATACCTCACTGCGTGAGAGAGTATTGCTCGAGCGGATA  
GAACTCCTTGCTGGTCATGTGCGATGCGTTATGCGCCATGCGATAACCCACAGGTTTCATCGCTTCTTACATGTCA  
T

>aly997.8:G514T

ATGTGGTTAATAAGTCAACCGAATTCTGTGATCCTGGAAGTGAAAGCGGACCCCAATTCCTGTGGACAGCAGTGCCT  
GGAGAAGGTATGCGAAAAACTGGAGATTGGTGCAGGAAAGTCTGATTACTTCGGTCTCCGAGTGTGCCCAGGATCAGGGC  
CGGGGAGATGGCTGAATCTTCGAAACCCCTCGATCCTCACCAGGATCCCCGGCGGACGACTGGACCTCCGCGTCAAG  
TTCTGGTCCCCGCCACCTGCTCATCAACGAACCCACCCGCCATCAGTTCTACCTGCACGCGAAGTTGGATCTCAT  
TGAGGGAAGACTAGTCTGATCCGATCAGGAAGTTGTTAGAAGGATAACGGCCTACATAGCTCAGGCGGAGACTGGTG  
ATTGTGATCCCGACGACCCTCCGATGCAAGTTTATGAAGACTGCAGCCGTATCGGCCACAGTCAGAGAAACCAGAC  
GATCACATCGACAAAATCATCGAGTACCATTGCGAGATTGCCGGCATGAGGGCATCACAAAGCTGAATACCGTCTTCT  
GAAAGAGATATCGAAGCTAGAGTCTTTTGGCGAGGAGCTCTTCTTCTGCAAGCCGGTACACAGACAAAACAACGCGC  
ACAATCTGTACAGCCATTTGCTGTACCACACGCAGCAAGCTGAGCCGAGGGCTAGGGACGAGCAGGAGATCGACGGG  
GGTGCCACTGTGCGGTGTCTGGCGTCCGGGCGAAGCCCGGCGGCTGCGGCTGCCGGCTCAGCACCTGCGTGGGCGT  
CGGCCCCCACGGCATCGTGGTCTACCGCCCCGCTGCAACGGTGAACAGGAGATCGGCGTCAAAAAACAAAGTATCC  
CGTACACGGCGATCCACCGCGCCAGCCGCACCGGCGCATCTTCCAGCTGTCTGACGTGACGGAGGAGGGCCACGAA  
GCCACGCTGCACGTGAAGATGGCCACGTCCGGCCAGGCCGCGCGCTCTACCGCGCCGTACCGAGAAGCACGCGTT  
CTACTGCTGCGAGACTGTCCGGACCGATGTCACTGAGCAGTTTATACGGGATCTTAAGGGCACGATAGCGTGCATCT  
TCAACGACTCGTTCGACGCTGGGGCGGCGCTACGTGTTGACATCCGACGCACGTGCCGCGAGGTGCACGACCGCCCC  
CGCTGGCGCTCGCGGTCCCGCAGCGGGCGGCGCTGGCGTGCAGCGTGTGCATGGACGGCGCCGTGACACGCTGTT  
CCTGCCGTGCCGCCACGTGCTCTGCTGCGCCGCTGCGCGCCGAGATGCGAACGCTGCCCACTGTGCCCGGAGAGA  
TCGAGAAGATGATGCACATCTTCTGCCGCTGGAGTACCAGAAGACCCCGAGGTCATCATAAAATGA

>aly851.8:C423A,G443A

CTCCTCCACGGACTTCTTCGAGAATTCGTTTCATGGACACAATCCATTGCTGCACCAGTTTCGTTTACAATAACAAGAT  
CATTATATAACCACGTCAATACATCGTTAACCATTGTACTCTCGCCGCTCCGCGCCGGTGCAGCTCGGGACTATG  
ATGCTCTGGTGTCTTCTCAGAGTCACTGTTCCGGGCCCCGGGACATGCGCCCTATACGTTTCTCTGTTGGCTGGAGG  
CGTTGCGGGGACGAAACTCGTCCGCTTAGAAGGCTTAAAGTACCCTTTTTATCTTAGCGCTAGTGGCCAGAACAC  
TGTCCGCGCTAGCGATTATTTCTGTTGTTTTCTTCGGTTCATCAATCGTTTTGGGCTTATCTGTTCTTCTTCT  
GCGGGCTTGGTGCCGAACCGCCGTACGCCATTTAGCGATGCCGAGGAGAACGATTGAGAAGAGAATCCATATGAA  
AACAAGCATGACTAGGTTGTCCATGGCTGTGTCCATATAATCGAAGCTGCAGATGAGATCGTCTACCGCTCGGCTA  
GGTCAGCCATAGTTGTCCATGGTGTCTGCCACCAAGCGGCGTTGTTTTCCCGCCGACCGCTCTCCGATACTGACTTA  
GCGTTTCGAGCCCACATCACATCATCCTTGGTGTACACTCGCAGAAGACATTGGAGATGCTGGGCGGGTGGCTGTC  
CAAGGCTCGGACCAGCTCTACACCAATGCCTTGTGTTAACAATTTACTCTATAGTGCGACACTTCAACCTTCTCTCC

TCGTTGGCTGAAGGCCTTTAGCTGAAAGGCCGGTGTGGCCTCGCAGTCACATGTTATTGTCTCACAAGTTGCTGCAG  
GTTGCTCTCAGTGGCGTTAGGCTTCAGAGGTCTACGGGAGCCAACGCCACCTTCACGTGGGGCCAGCCATCACACT  
TCAGCTCGCCGATCAGTTTCTCGGTAACACACACCACGTTTCAGACGGGCACGGAATCATAGCATCGTAGTGGAGGGG  
TAATCGGGGGGAGGCTTCGGGGATGTAACGCCTCAGTCGCGGGCAGGTGGGGTATGGGGACAGGTTGAACTTCAGGT  
GGGTGTTCCGTAGCGCGCTGACCACTATGTGCTCCCAAGTCCTTAGCAGAGACGACTTTAACCAACAGACGTTTTT  
CGCCGAGCAACTGTACACTACCGGCCGTTGAAGTGGGCGTTCGACGTGTACATTTGACGGTCTTGTGGAGAATAGGA  
AGTGTTCCTCCCAGGACGGCGACGAGGTATCCCGTTTGAAGGCGGTCTGGTTTTTCTGGGGTGGTTCATCCATCTCC  
ACCACGCAGTATGGCGCCACGCATCCGGACTTACCCGCTGAGATGTTTAGCAATGAACGTATGCTCGTTGTATATGT  
GGAGCTTAACGCCCTTCGCCGCCATCTTGATCTCTGGGCGACTGTTAACGGGACCAGATAGTGTTCCTGATACCG  
GCCTCGATGGTCTCCAGGACCAGGGTCGAGGCCTCGTGGATGAAGTCCGCGCTGATGCTGTACTGAATCCGGAGAC  
CTCGCTGAGAGAGGACAGCTCCATATTTGACGGTGGATTGTGGACAGGTGGAGGGCACCTTCACGTGGCAGTGTCT  
TGTGGCAGCGGAGCTGACAGTCGCGGCACTCGTAGCCTTGCTTACCAGCCCGCGCTATCGTCTTGTTCAGACT  
TCGCATACGGTGCCATCATACAGTCAGATGTGGCAAAGATCATCAGTG

>aly1341.12:T25841C

TTGCTGGGGTGGGCAGCACGGTTGGTTGTTGACAATCTCGCACACGTGAAGACGTGTGTATGTCTGTCCGAGCAGCG  
TGAAATACGCAAACACGAGGTGTTCCGCCAGAAAGCACCTCCAGCAGCGAGATGAGGTTGAGGCCATCGCGCAGGTCT  
TCGAACAGGTCGTTACGTGTGGTTACCTGGAAGTGCAGAATGATAGTCCAGATGAGCCCAGCGTGTAGCTTCGG  
GTTGCCGTTCGACGATGTCTCGGCCCTGATGTTGACCAGCTTGATCTTCTTGTAGCGGAGGAAGTCCAGGGCCATTT  
GGACGTTCTGCAGCATGTGGAAGCGCATGCGGCCCTCGTTTCGCGCGGCTGATATTACGCCAGTCTATCAGATCAGGGC  
GGTTCCTGTGTATCAGTGCCTTGAAGGCGAGCCCATCACGCCAGGAGGACGTGAAGTCCGCGACTCTCACTCCAGGG  
TACTTGGCGGTAGACCGCCGCGCCAGCTCAGCAGCGCCTCCCGGGCGGTACGTTTCGGTTCTTGACCAACCACTAT  
GTCGGATATCTTCGGGATCCAATAGCCTGGTGACTCCATATCTTTTTCTACTACGTGGAAGGCTGTCTCCAAACGC  
TCGCGAACCTGCCTTGACCTGCATAAGCGAGCACTTCTCGTGCAGCCAGGCGCGGTGCCAGGCAGCCTGCTCGGTGT  
AGGCAGCGGCGCGGCGCTGGGACTCCGCGTTCGAACAGCGGGTGCACGGGCGGCGGCTCCGGGAACGTCTCGTATAGA  
GACGATATGTACGTGATCAGGGATTTCTCGTCCGGTTTCGTGGGTGTCCACGTCTCAAGTTCATATACTGGTGAAG  
AGCTTGACCTTCTCCCTCTGACGCAGCGGCACCTCCTCGTTGCGGAAGCGCGTGTCTCACTGAGCAGCTTTTTTCAT  
CTCGATCAAAGTTGACGGGAAAGCACGGTCTGTGTAGCTTCTCCGCCAAGCGTTGCAAACGCTCCAGACGGCGGAT  
CTCGTCCGGCAGGTCCCGCTCCCGCTCCTGCTGCGCCATCAGCAGCCTGGACCACGCCTGCTCCAGGGCGTCCGGCC  
TCAGGGTCGGCTCCACTCACACTGCCCCACTGATTCGAAGTATTTGTTTTATGCAGCTCAGTCGCCTGAGGGTACC  
TCCCTTCCCTCAACGCGTGCAGTCTGGAACATTTCTGGATGGTGTGCTCCATCGCTCTTAGCTCCTGTTCGATT  
TGCTCGGCGGCCATTTTGGCCTCAGCGGGATGCACCCCGCGTTCAACTCTGCGGATCTCGTTTTGATGTGTCTTC  
TACGTTGTGAGACCGCCCTCTGTTTGCTTGATGTCTCAATCTCTCCTTGCACCATCTGGTAGCTTCATGCAGCTGC  
TGGAACCTTCGGGTCCGCGTTCATGAACCCTAGTCTCCAGCACCGTCTCGGTCTCTCTCCGGACGGTGGTCTGCTGTAC  
TGGTAGCCTCACGGAGGATAGTCGAGGAACCAATCGTCCAGTGAAGGCTTGACGCGCGTTCAGCCAGCGGTCTGGA  
CTTGTGTACTCTTAGAGTGAATTTGGTTCGATCTGTTTGTGTTCTCGCTGATGCTTGTCCAGTTCGTGCTGGACTGA  
TGGAAGTCCGATCCGTAGTCGGCTTCGTGAAGCTTTTTCGCTTTGTGCTGGTTGAGAGCAGTTCGCGGTAGAGCTT  
CTGCAGCTGGCTGAGGTGCTGGTTGTACAGATTTAGCTCTTCGCCGAGAAGTTGGTGCAGTGTGCACGCATTGTT  
CGACCTCGTAATAATGTTGGACTGCTGGCAGGTTTATGTGTGGGTGAGCCAGTCTCTGGACAACCTCCACTTGTTC  
TTCTCGTTTCAGCCAGTTCAGCTCAGCTGTGCGCGATTGGAGGAAATCTTGCAACGCGTCCAAGTCTGACATGCTGCA  
GATGGGCTTCAATCGTCTTCATAGCCGGATGGTGTGCGCAATCAGGGCTTCGCCCTGTGATCAGTTACTGAAC  
TGGAGCTCCCGTTTTCTCAACGATGACATGAGTTGTTTTGTATCCATTTCTCTGCCTCCTTGACTTGTTCGAAGAAG  
TTGTGGTATTGGGTGGTGTGCTTCAGATGGGTTTTGAGGCACAGCGTCAATTGGAGCACCCAGGCCATTGGGACTG  
CATCACATTGGCGTGTTTATACGCGCACACTGTCTCCGCTCTCAGTGGCCTAGTGACCGGTGATCGTCTGTTTCA  
CTGGTCTTATTTCTGGGCTTCTTCCACCAATCTAGACACATTAGTCCCGTGGGTGTTGAGCTCTTCCCGTAGATCC  
TGCATGCCCTTCAGGAGACGCTCCCTTGGTTCGAGGGTGAACCTCTGACTGCGAGAAGTGTGTTTAAAGGCTTCTTC  
GCGTCTATCATAAGCGTTTCTCAGCCTAGACGCAGCATCCAAGGCCTCCTGGCAGGGCGGGGGCAGGGCGACTACA  
GCGCCCGCAGTTGGACTTCGGTTCCCGCGCCACCTCCAGCCGACTCGCCAGCGGTGCGACCCGAGTTGTCCACCAC  
CGTACCAGCTGAGCCTTTCTCCACTGCCACTTGTGGGAAGTCCCATCTTTGACCACTTTGATGGTAGCGAAGATCA  
TGTTCTGACGCATCCTCAGCTGCTTCTCTGCCATAGTTGGATGACCCTCAGCCCTCGTCTGCTGCAACTCGTCT  
GAACAGTCCGGTTGACGTGCTGATCTCTCGTGCAGGACGCAAGTTGTGGATCAGCCGCGTTCGCTTCCGCTAACA  
GTTTTCTCTGCATCTTCTGTTGAGCGCGGACGAATCGCTTACGTTGTTCCGCGCCCATCGCCACGAACCTTGAAAGT  
ATTCTGTACTTCTTCCACATCAGTCGACAGCGCGTGCACGCTGCTCTCCAGTCTTTGTGCTGGAGCACCAGGTGTT  
CCAAGGTATCCAGGTCTCTGGGGATGTGGCTTGCATCCGCTCGTGGAGTTGCCTCTCCAGAACCTCCAACCTCTCC  
AGCAGGTTGGAGGACTGCTCCGTGAATATCCGGGCCGCACTTCTCGACTCTTCTTTCAACAAAGAGTTGGCTCTTCG  
ATTGCATGTGTTCCACTTGGCCATCACCTTGTGAGGCTCTTTTTCATGGCTGGAGTCTTAAAGGGCAATGCGTCTT  
TTAGCAGCTCGACGTGTTGGGCGAGTCTTGAAGTGCGCCAGTTTTGATTTCAAGTTCGGATATCGTCTGTTGTTT

TCTTCCATGCTGTTTACTACAGTCTCTACGAACTTTAGCCTCTCAGCGAGCTGCCCGCACACGTTGTTCCAGCGGTT  
GTTTCAGCTGCGTGACCTCCTTGTCCAGGCGTTCCAGGTCTATGTGTTTTCCAGCACGGGGCAGGGAGTGGGGTAGTG  
CTGCTCTGGAGCTCTCCACCAGACGCCTGCAGTTCTCAGCGTCGTGTTTCATCTGGTCGATCTGGATCTGCTGTTTTG  
CTGACCGCTACTTGCATGCGAAGCAGGTCTTCGTGCATCCTAGTGGGTTCAAACCTGCTCCTTCGGCCTGATCTCAAT  
GGGTGGTTGGGCCTGAAGCTTGCTGTATGTATCTTCGATCCATTCCGCTTCCTTCTCCAGACCAGCGTTGTAGTTAC  
GGAGGAGTTGGTAGGCGGCTTCGCAGCTGCGTAATCTTCGCCTCCCGTATGAACCTTCCACCCTCAACGTTAACCTT  
CTCAATCTTGGGCGTCTTTCCACCACGCTTGTGAGTAGATTGAGCGTGACAATATCTCCGGGATTGGCCGCCGCTA  
TGCGCCTCAATCTTTCATACAGCAAATCCAGGAGTCTTGGTGCTTCGCGTTCAGTTCATCCAGCTCCCTGGCTACC  
GCTTCAGCACCGCTTGTGGCTCCAACCTCCTTCGACGGTGGCGGAGTCGTTCCAGCCAACGCCACGCTGGCTGCCT  
CCTCAGCTGTTTTCATGTCCAGGGACGGGTGGACCTCCTCACAGAGCCACTCCGCGTACCCTTGGCACCCGATGTGT  
TGATTTCTCAGAGGTAAGTGTGTTGTGTAAGTGTGTTGCGTGGTCGCCAGTTCTTGCATATTTGAACCTCTGTCTGA  
AGGAGCGTGTGAGCGCGGTGCCATCGCCTCCACAAGGCGCAGTTTGGGGATCCATAAAAAGTCCCGTAATTTTCATT  
GTACACGCCCTTTCTAGAGCTTCGATCAGAGACAGTGGTTTTACGGACTTCCACTAAAATGCCTCTTTCAAAGCTT  
CACGGAAATCTACCCTTTTCATCGCCTAATAAAAATAGTACCTGTCTTCCATCTACAATGCCCTTATCAACTGCAAAT  
TCAAACGGTATAACTTTGCCACATACGTGGACTAAAGTGGACTGAGGATCTAACATACGTTTTTGAATTGCTCTATC  
GGTTGGAACTTTTTCTTTGCTTTGCGGGTGTGAGAATTTGCCGGATTTGGGATCGTAAAAACCTTTGAAAACGGCCT  
CAGGTAAGCTGAGTTTTCCGTTTTGTCAGGTAATATTAAGCCCCGTTCCAGAGGCATCAGTAAGTGATATTTTGTACCT  
TGTAGCGGGTCCCTAACTTTGCCTTCTTTCGAATCAATTATGCCTTCTTGAATAGCGTCAGCTAAAGTAATCATTTC  
CCCTGTACTGGAATTCCTAACAGTTAAAGCTGCCGGATTAATATTACCAACTTTAATTGCATCCTCAAGTGTCAATTG  
TTACATTTTGAATAGTAAGAAGACCTGTATCAGGGTCATAGAACCCTTGAACCTAATCCTTCTTGTAAAGTCCATGGT  
TTCTTGTGCTTAAACAAATATCCTTTTTCTACTAGCTTCTTAAAGATTGTAAAGTGGAGCAGTAATCATGCCTCTTTC  
TAAGTCTATGAGACCACCCTTAAACAGCCTGTTGCAATGGAACAACAGCCTCAGATTTGTATCTTTGATTTTGCAT  
CAGATGGATCAACAAGTTTGTCTTTGATGGCTTTATCAAGAGTCATCGTTTCTCCAGATTTCCGATTTAATATTTTA  
CATGTGTCTGGGGAATAATAACCTAATTCATAACATCGAATAGCGAAAATGTAACATCTTTTGTGGCTATTAGACC  
CTTCTTTAATGCATCATCTAATGGAATGTATTTACCAGTCTTTTTGTCTTAACTCCTACCAGTTTCTGGATTTATTA  
GATTTGTGTCAAGAGCTTCCGATAGCGGTACGAACTTATCTGAAGCAGTATCTTTTATTTCTGAAATTGTTGGGTGA  
ACGATATTTCTATCAACGGCATCTGTAACCTGAAACGAGCTGCTCGGTAACATTATCTTTGATTCTTCTGATTTAGG  
TTCATACATATCTTTCATAATTACTGCTTCAATGGAAATCGGTCTTCGTATAATCGTAATAAATCCGCGTGAATTG  
CCACTGACACTTCGATTTGTTTCGTGGGTTTCAACTATTGTTATTATACCCTCATGGATCTCTATTACGCCACGCTCA  
ATAGCATCAGAAAAGGATATACTTTTCAATTTGTTTCGTGGAACCTTAAATAGTAGGGATTCTTGTACTATTATACCCTT  
TTGAACAGCTTCTCCGATAGGCACTAGCTCACCAGTAATGTCTTTGATTTCTCCAGTTTTTGGATTGTACCGTCTT  
GTTCTAAAGCGGACTCAATAGATACTTGCTCCGGAAGTGATATATCTTCCGGTTTTTCAACTATCCAACCAACTTGG  
ACACATTTCAAGAATGATACGCGTTTTTCCGGTCTTGGGATTAACCATGTAACCTGTATTTTTGTCAATAATAGGCCT  
TGCAATCGCTTCATCGAAAGTAATATAATTATCTGATTTGCAACCTAAATCTTTGACCAATATAGATGTGGGATCAA  
ATATATGTAAGCCATAAACAAGTTCTTCGAAAGTTATTTTAGCACCAGTTTCAGGATTTAAGAATACCTGCTTCTCG  
ATATCATAAACGCCCATTTCCGACAGTTCCTCTGGAGTGAGTTTTTGGGAAATAGCAATGCATCGCTTAGGTTTAGA  
TTCCTTAACAACAACAATTTTTAGAAAACAACATCAACTGGAGTAAAACGACTGATTTGTTCTGTTCTAACGAAT  
CCTGTACGGTTAAAGGCATCTCGACCCCGTTTCAATATGATACGACATACTTTGGGCTCAATTTTTCTTGTGCAATC  
GCATCTATTAATGCTATATTTTTCCACAGTATTTCAACTGTTCTCTGCAACTCTTTAGTTACATTTTGTCTGTGAT  
TTCTTCAATAGCTCTTAAAGGCTGCTTTTTCAGCATCGATAAGAAGTGCAGACATGGTTTTACCATCATCACTTGGAA  
TCTTATCCTTTACACTGGGTTCTGTTAACCAATTAAGTATCATCAGTTTTTGTAAATTTGAATCTTGGGTTGTA  
TCTGTTGGAATTTGGCGCTTAGGCATTTCTCGGGTGTTTTACTAAGCAAAGTATCAGAAACAGCATGCGAATCTTT  
TGGTATCTCCGTAATGTTGTCGTCCCGTGGGGTATTACCAGGACCACTTTAGATTGTTCCAGGTTCTTCTTGGCG  
CTGATTTTTCTTCTATTTTGGAAATCAACTACGCTCTTACTGCGTCTACTACCATTGACGCTGCAAGTATTGGTGCA  
CCAACAACAGCCACTAGGCCTAACTTAGCAGCATCAGCGAAACTCATTTTACGGCCGGACTTATCTTTTATCTCACC  
AGTTTTTTTCAATAAATATCTTTGCGTGCGGCTTCTTTTAAATGTAATTTCTTACCTGTTTCAGACTCAATGACTT  
TTACAGATGCTGGAGAAACGATTTCTTTCTTACTGCTGTAAGGACATCATCAACAACCCAGTTGATGTTGATGTT  
ATGGTATATGTCTTTGGATCGAATGTTATTCTGTGCAAACTCTACAGTTTTTGAACAGCGCTCATTATCAATTAG  
CTTACCTTGTAAACACATCTTCCATACCTTTATGAGGTGTCTCATGCGTAAATCACGTGTAACCTTTATTGTCTGGTT  
TTTTCATCATCTCCTAATGAGACAGATGGCTCGCTTCTATCTTTTGTAAATGGTGTGTTTATGTTGTCATCTGACATG  
CCAAACGGTTTTATCGTCAATGTTTCGCTTTTACTACTTGGATCGGGCGATATTCTCGATTTCTGGCGTTCAATAGTAGT  
TTCAATTACATGATGCGGTTCTCGTAACTCCTCTGTTACTACTTGTATACGAGGTAGACTCGTTCTGAGTAATTTCAA  
TTGTTGTTATTTTGAAGCTTTTCGTAGTAACGACTGTGCTGGTGTGTTTCAGATATACTTTGATTGGTGCCGAAGTA  
GTGATCGTTTTTAAATGATGGTTGTAACCTCCTCAGCGTTAGGAGAAGTTTGGCGTATTTCTGTATTGACGGGGTGT  
AACAATAGCCACATTTTTGTCTGATGCCGTAATGGATTCTTTGGTTTTAGCCTTGGATCCAGTATAGTCGATTTTGT  
CATCAGTAATGGCTCTTCTGTCTAGATGGCTTTTTCTTTAGGAGTTCATCTTCTGCTCGCTTATCTTGTAAACGGT  
TTTTTCATCGGCATTAGGACTTAGTTTCACTTATTGTAAGTGTGATGAAGGTTCTCATCATCTCGTGAAGTAGTTAC

TGTGGTAATATATTTAGTTTTAGAAAACAATAGTTGTACTTTTCATGTGATACTGGTTGTTCTTTAGTAACATATTGTG  
ATACTGGCGCCTTTTGTTCAGATCTTGCAGACACCCTTTCTTTAGGTGTTTTGGGCTTTTGTTCAGGCATGTCTCTC  
TCTTTAGATTTTTGGCGTTTTATCTTCTTTTCAAACAAGTGGTTTTACGAGAATCAATGGGGACGATTAATTCTTCTGT  
TACTGCTTTCTCTGTTACACCTATTATTTCAAAGGCTGCTTTTTGTTGTGATTCAAGCTTTCCAACGGAGGAAGGAT  
CACTAGATTTATCTTTAGGTTTTGTCTAATGAATCTTTCTTAATAACCTCTTCAGGTTTTGGCGACTTCTTGTGTTTT  
GGCTTCATTATTTTACTTGTAACTGCTTTGGCGCCTTGAACAACAGCCATAACCCGCTAGCACTGGTGCAGCAACTAC  
AGCCACTAAGCCCATTTTAGCAGCTTTCTTAATATCAATCGATTTGCCTGTGTCTGGTTCTTTAATTTCCCGCTCT  
TTTTATCAACGAGACCTGTATTAGTGTCTTCTTGAAGTGTACTGTTTACCAGCTCCTACGTTATATATTACCGAT  
TGAGGATCAATTATTTTCTTTCCAGTGTCTTCTTGAAGTGTACTGTTTACCAGCTCCTACGTTATATATTACCGAT  
CTGTGTTTTATCGTCAAATAGAAGTTCAAATGCTTCATTTAGATCGAGCAATTCTAATCTTTTTTCCGGTGTAGCGG  
TCGCAGAAGTGGGATTTGATTTCCGTATTAGTAAACAGCATTGACCGCTTCCGTAATTGACAAGGATTTCCCGAGTA  
TTAGGATGAGTGAACGTACCTGTCTCAATGTCAATGTAAACCAAGATTAAGAGCGTCTCGAAATTAATATTCGTGTC  
GCTAGTAATTACATGTTCCCTATTTGTTGCTCCTCTTATGATGCCTTTTTCGGCGAGCTTCTTCTATGGACATTA  
TTTTCTCTGTTTTTGTATTTTGCACCTCATTTGTATTAACGAGAACATAATCGGCAAGAAGTTCTACCATTTTTGTT  
GTGATAGTGTGTTTACAGATGAAAAAGTTTTCGGTTATCGTTGTAACGACACCGCTTATTTCTGTAATCTCTTTGTCAAG  
TTAAGTGCTACTAAGCCTTGCTCTAATGCTTTGTCTAAAGGAATTTTTCTTCTTAGTATTGGGATCTGTGAATGCAC  
CTTCTTTAGGTTTTACAAGTCTTTGATTTAGTGCATCTTCTAAAGGAAGTGTGATGAGGACTGAGGGAACGGAACA  
CCCATAATCAAATTTGTTATCAATAGCTTACCTATTGTCAATTGATTCTCCGGTGAGTGGGTGCGTGAATTTCTCCCGT  
TTGTGGATTGATGAGATTCCGTTTTAGAGCGACGGTCAACGTCAACCCGAGGAGGAATATCGTCGATTCCCTCAG  
CTGACGTGTTTTCGGGTAGTAAGTTATAATTAAGTCTAATTGGGCTGTACTAGTCTTTATAACA  
TTTTTGTCACTATCCACGATGTTTTCTTTGATAGCTTACGCAAGCGTCATGATTTTTCTGGAGATAATGTAATAAC  
GGACAAAGGATCAACGATGTCAAAATTATAGCTTCTTTAATGTCAAATGAGTGCCTGTTTTCTGGGTGAACATTTT  
TTCCTGTATTCGGTTTACATAAAACCTTGCTTATAAAGTTCGGAAATAGTAAGGCTCCTGTATATAGGTATCAATACT  
TCATCTTGGCCTTCCACATCTAAGACTCCCCTGTTAATAGCTTTCATCGATGTTCAATATTTTACCATGTACTGGGTC  
AACAATATTTCCCTGGGTGTTATCAACCAGCCACATTTCTATAGCCTTTTTCTAAAGTCATAGGAGATCCATCTTTAT  
CTTTGTACAATTTGACAGATTCCAAAACCTTTTCCCGTTTTCTTTATTTATTAACCTCTTTCTACGGCTTCCCTCTGGA  
GATAGTACACGCTTTCTAAGTTTTTGTAAAACAAGTGGTTTACTGTGAGTACGTTTGCACCTTTTTAGAAAA  
ATCTATTGGCAAATTTAGGCGTATTACTAATACTCACTTTAGTTAAATCGATTATTTTTGTGTCAATTTCTTTTTCGC  
CAAATTCATTATCGAAATGATTTTACGATTATCAGCCGAAAGACTATTTTTGTATGGATTCTACAGTTATAAAAACCT  
TCCGAAACAGCAGCTCCTACAGACAGGGGTTTTAGATGTGTTTTGGGAATATGATACAGTAGTTGGTGACCTTACGGC  
CGATGCATTTACCTCAGGACTTGATGATCTTTCTTTAAGAGATTGCATGATTTTTTCAAAGTAAGTGGATCCACAA  
GTCCTCTGGTAAAAGCTTCTTCCATAGTCAGCTTCTCCCCTGTTTTGTGGATCTACTACGGTAGTTTTTATAAACTTA  
GATATTGTGATTGTACTTCTGTTCCGAGGTCCTTTGTTCCGAACTCGTACGTACAAGTGTGTGCGCCGTCGGGAGATTT  
ATCTCTGATGGAATCCTCATACTTTTTGTAAAGTATCTGGATCAACTAAGCCTCTTTCATATGCCACTTCCATTGGTA  
GCTCTTCTCCAGTGTGTTGGATCTACAACCATAGAACTTTTAACTAGCTGGATTATCTTAGTAGCCGCTACTAGAGGA  
GCACCTACCACAGCTACAAGACCTACTTTAGCCGCGTCTGCTAAACTTATTTTTCTGCTGATTTATCAGTATATTC  
ACCCGAATCCTCGTTAATAATACCTTTGTCTAAAGCCTGTTTTAGAGGAATTAATTTGCCACTTTTAGGATCTGTAA  
CCTTAACCGCCGTAGGTGAAACTGCCCGCGATCGACGGCCTCGATGATATCTCTGAAACACCTGATGTTGTTGAT  
ATAACTAATGCTGTAGCTGGGTCAAAGATGACCCAGGTTTTACTTGTACGGGTTCTAAGGCAGATTGTTCTTCCAGA  
AATCCTCTTGTGCGCTGGCATGTCTTGCACCTCAGATATTTCCATTTTGTCTGGCATGCCAGCAATGGATGTAATTG  
TAATAACTTTGTGCGTAGAAACAGTTGTTGATAGGTGCATGAAAATTATAAATTTACGTTCAATTGATTCTTTCATA  
GTTAATGTGTATGTTTGTATCTGTAATGACCTGTGTTATCTAGTATATGCAAGTCTAAAGCTTTATTCAACATAAT  
TTCTTTCTTGGTTTTCCGATCTACTACTTTGGCAGATTCTGGATTTATAACGTTGAGATCTATCGCTTCTTTTAGGT  
CTAGTACCCTATCGGTCCCTGGAATTATAAATAACCCTGTAGATGGATCAAAAAGATTTTTGTTGGATTGCTTCCCTTT  
AACGTCCAGCCACCATTTGGCAGCTCAATTGTGTTTTTCTTAATAGTCAATGATGTAACCGAAGGTTCCGTTACGAA  
CGATTTTCGATCGACATTTTTAACTCACGAGTTATATCTTCTCGAGGCTTGTCTATCTCATGAACAACATAAATCGG  
GGCTCTTGACCGTTTTCAGGCTGTGTTGTATGTTGTAATTTACTTTCCGGACTAGGTGGAAGGCTTTTTATGAAAGAT  
TTTTTAGTTATTTTTGAGTTCTACTACCTGACCTGGGACTAATTTCCCGTTTTAGTAACGCGATCTGATATCCTAGCTAC  
CCGGGGTTCGTCTTTTTTGCACACCCAACAAGCCCTCATCTAAAGCCTGTTGTATTGGAAATACTGTTCCCGTTGTTG  
GATCAGTGAAGTTTTGGGTACTCTCATCGATAAGTCCATACGTAAGTCTTCCGCAATGTAATAATAGTATCCGAT  
CGACGCGACGCGTTAGTATTTGTTACTGTGACGTATCTTTTAACTGTTTTTGTAAACCGTTTTGTAACGTGAGTGTAA  
ATTTAGAAGGGAATTTAACAACGCAGCTCCCTCGGGTGTAAATCATATTGATCTCTACAGCTTTATTGAATGGAATGG  
ACTTCTAGTAGCCGATCTAGTAAGTGGCCTGTTTTAGGGTCTAGAATATTTTTTAAACACCGCATCTAACACAGAC  
AGCTCTTTATCATTATCAAAGATCCCTATCTTACGATTGAACATTTCTAGGACCTCGGGGCGAACAATAGAGACTTT  
AGTACAATCTTCTAAATATACAAAATCACCCTTTAGCTTTGAGGAAGGTTTTCCCGTTAACGTACTTTATGTTAC  
CTTTGCTTAAAGCTGTGTTAAAGGAAACAATTCGCCGTTTTATGGTCCCTAAAGCCATCAATGTGCAATATAGAT  
CGCTGTGAGACTGATGTGATAAGGCCGCGATCTACTGCTTCTGGAATGGTACAAAGTTCTCCCGTTAAATTTATCGCG

GAAC TTATTATCAGTAAGTATAATCCTAGCACCTAACGCTTCAGACAATGTAAGGAGCTGACCGGTCGTAGTGTCTG  
TTATACATTTTACACTATCACTGTCTAACACACCGGCGGATATTGCCTCCAAGATGTTCAAAGGTGTTTCGACTAGTC  
GGAGATAATATTTTACCGTCATTTCGTATTAAATTATTATCACATACATCTTTTAAACGTCATCGGTTTACAAATATA  
CCGTTTTGTTTCTGCATCCTTGAAAGTTAATTTTTCTTTTGTACACTGTGTACATATTTAGAAATGTTTTCGTATTTA  
TAATATTCTTTTCTATCGCTTCGGTTAGAGTTATTTTAAATATCATTTTTAGCATCAACGATTTCTCTAACATTGGGA  
TTGATTAGTTTCGTTTTTATAGCGACGTCTAATTGGAACCTATCACCGGAATTCCTGTCCAAAATCCAACCACTGTT  
GTCAACTAAGTCTTGGCTTATCGCGTCGGATAAAGACAGGGCGCTTGATTTTTATTTTGGATAATCTCATTATAGATCA  
GATAACCTCTTTGATAAGCTTCAGCTATTGTTATGTACGTGCCGTTTGGTAACCGGTAGAGACCTCTCTGTAAGTCA  
ACTTGTCCGCGGTTTAAAGGCGTCCGAAATACTCATTCTTGTGTTGTAGGTTTTTCTCCTTCTACAGTCACCTTGAT  
TCTCTTCTCTGCTGGATCAGTGAGTCTTGTCCGCGTCGTATAGTTCCTGTTGGATGGCTTCTAGTAATGTTACTT  
CATTCCCGCTCTTCAGTCATTCCACATGGACCTGTTAGTCTTGCAGCGAGCTTCGGGTCGATGAGTCTTCTCTTCGCT  
GCTTGTCTATTGTCATGTTTGTCTCGTCTCTGGGAAGACAGTAGTCTTCCCGTTTCGGACGTCTAATATTCTCAT  
ACTAATAGCTTGACCGACGGTCAATATCTCTCGTGTTCGGGGTGGACTATACCTCTGGATTCAATAATATTTGGAC  
CTTCATACATTTTATGGAAGTTCGCTTGGAGATTCTGACGTGAGGTCGTATCGTGCCTACGACTGTCTTTGTTGCA  
TAGTTAGGCGAGCTTAAATTTGCCATTGGCCATCGATTTAATTGGTGCATGGCCATCAAGCTCTGTTGTATGTGACGT  
CCTGACGTATCCTCGTTTTCTGCTGGCAGTAAGTAACCTTCTTAAAGAGCTTAACTAAATCGAGACTGACTTCCTTT  
TGCGGGTCAATTATTAATCTTCTTCAACTGGATTGATCAGTTGCTTCTCTATTGCTTGTACCAATGGCAATATTTT  
CCCAGTGTCTGGTTCTTTTACAACAGTGTGGATGGATCGACGATGCCCTGATGTATCGCTTCGCCTAACGTTAATC  
TCTTACGGTCCATGACGCTTGTGTTATGAATGGATCGTTCAGTGCACCTGTCTGTCGGATTGTAATACCGAAATTC  
AAAGTTTCTATGAGACTGAAGCTCTTTTTAGGCGTCATCAGAAGACCGCTTCAATGGCTGCGCTTAAAGTATTAAG  
TTTAGAGGTCTCTGTATCTAAGATGTTACCCTTTTCGGCATCCATGAGGCCTTTGCGGAAGGCCTCAGGAAGTTTGA  
TAAGCCTTTTCTTGAGATTATCCTTTATAAGCGCTGTGTCTGGATCAATGTAGCCCATTGTGGCAGCGTCTTTGATT  
GTAAACACTTCATTGGATTGCGGATCAGTAAACCGGGCCGTGGCGATATTCAAATGCCCGTCTTCAATAGCTTGTTT  
AAACGTTAGAGGTTCCCGGATGTACACAATCAAATATTTTCAAAGATAAAGCAAAGAGTACGCGATCGACCGCTTT  
GATCAAATAATCCTTTAGCATTTTTATCAATTATACCGTCGACAATGCCTAGCTTAAAGTGGTACGTACTTATTCTTG  
TGTGGATCTTTAATTAACGCGGTTTCGGGGTCGATAAATTCATATTTGATGGCTTCATCTAACGTGAATCCCTAAG  
TACTGGATCTTTTGAAGATGAAGACTCCGGCACGTAACGCCTAGTAACTGTTTGTGATGTTACTGGTTGAATGACGG  
TAACAAGGAGACCCTTATCAAAGGCAATATCTAAGCTGTACGTTTTCTTTGCTTTTGTATCTAGAACTCTACCTTTA  
GTTACATCTACATCACCTTGTGTAATAGCAACAAGAAGCGGTTTAAACTTATTGGTAGAACTGTCTTTTACGACTGT  
ATGTTCAGGATTGAGAAGATAATTTGATAGCTTTGTTAATATCAATAAATTCGTTTCGATTAGGGTCTACTATTT  
TTCCGTTGTCTGCTCTAAATAAGCCGTTTTCTTATTATTTCTCAAGACTGAGATTTTTCTTTGACGTAACCTATGAGA  
CCACGGTGTTTAGCGTCTAATAAATTAATTTGATTTCCGTTAGGTAAGATGTATACACTATTATTTTTCGTCTATGAT  
TCCGGAATTAATGGCTTCATTTAATTTGACATACCTACTCGTGGGAATGTTTTTAAACAAGCGATATTCCAGGGTTAA  
CGAGTTCATCATCGATGGCATTCTAAGCGATATTTTTCTTTCACTCACCGGATGTATAAATACATGTTCCGGTGATT  
TCGTACATGTTTATTGCAAGCGTTTTCTGATAAAGTAAAACCTGCCTTTCAATGTCCACTATCAAACCTAAGCTCAT  
GGCCTCCGAGAGAGGTAAGTGTACGTCTGATCCAGGCTCAATAAATTTACCCTTCTCCTATCAATAATCTGACTAC  
GGCAGCATTACGCCAATGTTAACGGTTTTTTCAGATTTTTTGTCAAATAGCAAAGATATTTAGGACTGACAATTGAC  
CGCCTGATTGCCTCATGTAAAGTGATTTTACGACTTGTGGCTGGGTCGATAATTTTACCGGTACCATCATCGTACAG  
TCCTTGATGTAGCGCACGTTGTAAGCTAATAGGCGCTTTGCTGTCTACTAGTAAACCGATTTCAAACGCTTTGCGCA  
GGCTAATTTCTTCATTGTATTGTTAATATTTCTAATTTTGCAGATTTGTATCGATGACACCTGTTTCTATTGAC  
TCTGGTAAAGTAATCTTATCCATTTACCTCGTGAGGAGCAAGCACGTGCTGCCGGACACAAGCAGTTGTTTAGCC  
TGGTCCGCGCACGCCGACACTTGACGCTGGTGGCTCTCTAGGTCATCCTTTATCAGCTTCAGTATATTTATCTGGTT  
CCGGAGTTCATCCATGTCTCTTTCACGGCCTCTGTTTTGCCAACCTCTCCTCGACGACGGCGATCCATTCTAGCA  
ACTTCGATAGAGTCTCATCGCAAAGCCTGTACTTCTCTTCAACTGCTTGGTGAACCTTTCCGAGCTCGTCTCTGGCCG  
CTGCGAGTCTCCTTAAACATCTTGTGCGACTTCTCCGTACACTTATCGCAGCGCTGTTTGGATTGGCGCACGCCGCGT  
TCCAGTGTGCCACCTTGTCTTTCATCGACAAACTTCTGAGCAGCCATAGTGATGAACCTCAGGTCGGCTGGTGGCG  
GATGACGTCAGACACGAACCTCCCTGACATCCTCGTCTGTCCGGCAGGCTGTCCAGCTTGGATAGAGCCACTTCTC  
TCTCCTCCAGGGTACGGTAGGCGGTGTCCATCCACGCGTGAATGTGTTTACCTCATTACGTATTCAACCCTCTC  
GGCACGTTGCACCGCTCCCTGTACCGCGCGGAGCCGTGTTGGCTGTGCGCAGACGGTCCAACAGCCGCTGCGCAC  
GCGCAGCTAGTTCCGCGTGTGCTGCGCGCGGAGAGGCGTCTCCGCACTGCGCTCTCTGACGCCGAGGCACG  
TGCGCTAGACGCGCGGGAATGATGTGCGATAGTCTGTTTCCAGGATTGATAGGAATTCATCCTTAGCATTGTCAATAAG  
TCGTCCCTGAGACAGGATCTCGTTGTGTAGAGCCTTAGCGCGGGCCAGCTGCGACTCCACCGCTCTGGGCTCTCCCC  
CAACCGCTTCTGACACCGCGCTTCGGACTTGGCCTTCCACTTCAAGGCGCTCTCAGCCTGCTGCAGCCACATCGCCT  
GCGCCTCAGCCGCGTCTGACGCCCCCTGGCACTGCAGCAGGGCCGCTCCAGGTCGCGCAGCGCGCACCCAGCGCG  
TCACCCAGAGCGTTGTACCGCTCGCCAGCTCCACTACCGGCATCTCCAGCTGCCTGATCTCTGATGGTGTGAGGTT  
GCCTTCCAGGGACTTACGAGCTGGTTCGATGCGTTTTCTTTCATAAGAGCAATGAATACGAACGTACCTAGCATAT  
ATATCCTCGGCGCGTTGCTCCAGCTTCTTCCGATCCTGGCGTTGGAGGGTTGAGGGCGGCGTCCCTCGCCGCGG



GCGCAGCTTGCCGAGCGTGGCGCGCCGCCCTCGGCCTCCGCCAGCGCCGCGGGTGTCTCGCGGAGCTGCTCGTCTA  
GACGCTCCCGCATCAGGGACGCGGGCTTGGATTGGCTCCTTCATCCTGTGCGTACTACATGTGTATCGGTGACATC  
CTTCTTGGAGATCAGCTCTTTGCCGTTGCGGAGACACTCCTCAAGCAGCGGCATTTGTTTGTGGTGTGAAGTCAG  
CCATTGGTTTTTCAAAGCGAACCTTCTCAATAGTAATCGAATAATCCCTGTGTTCTTCGCAAGTGGTCTGAGCTCG  
TCCTGTTGTTGCTTGATGACGTCCAGATCGACTGCCACTGGACGAAGATGGCCACGCGGTTCTCCATCGACTGTAG  
CCACTCGAGCACCTGGTAACATAATATTATTAGAACCATCCAGATGGAAGCCGTCTTGGCTGGAACGGCGTGACGAA  
AAGCCACTGGATGCTGAATGAGCGGATGCCGGGCTGGCTAGGCCAGTTTGCCTGGTGTGGTGACCTGGTCTCCAG  
GGTACGGCCTTATCCAGGAAAGTGTGAGGTTCTCAAGCTGTCCAGGTGCTTCTGAGTTCTGTCGCGCACGGCGTC  
CAGCTCGGCCTGGCGGTCCGCCAGCTTGGTGCCAGCAGGCCGTACCTGTTGTTGATGTCCGACAGCTGTTGTTGGA  
TCGGTGACAGTTCTGTGTCTTAGTAGAGTCGAGAATGCTCTGCTTCTCATAACATCTCCTCGAGCACGGCGCGCTT  
GCTTGATCGTCTTGTGCGCCTCCTCCTTCTGTGCTCGGATCGACTCCTTGGCAGTTGTCTTTGCACTTGTCTTGA  
AGGCGTCGTGTAGAGCCTTCCACCTGGAAGCGACATCCTCCATTTCTGTCGTGAAGACGGTCAGCGCTTGCACGCTC  
TGCTTGCCTTTCAATAAATTCACGAACCTTGTGTACTTGTGTCTGGACCATTCTAGAGTCGGACGAAATAGGTCCGAG  
GGCGCCATCATGCGATCCTTGGCGCCGAGCCATTGTGACAAGTTGCTGTGGGTGTCTGGAAGTCTTTCATCTCCT  
CCATTAGCCGGATCTTATTGAGTAGATCGTTCCACCGGTCTTGCAAATCTTGCACCTTCTGCGCGAGTTTCTGCGCG  
TCGGGCTCGTTGTGGTGCAACCTCTGTAGTATGGCGCTCGCCACCTGCTCCAGGTGGGCGAGCTGGGGCTGTGTCC  
ACGGAACCTCCTCGCGGAGGACTTGCACCGGCTCCTGCTTGGCGGAGACATCGTCCAGGCGGTCCGCGATGCTGTGCA  
GCGCGGTACGCAGGCGAGTGAGGCTCGCATCGAACTCGCGGGACGTGTCCGCCGCGCGCCTAGAGATGACGCGCGT  
TGGTCCAGTTTTAGTGCAGACTCAATCTCCGCCTTCCGATGATCGAGTTTCTCTGCAGCGCGTCATACTGTGCGCG  
GGCGGCGGTGAGCTTGGCCTGGATGTCTTGGCGCGCTGCCGGTCCGCCAGCACCTCGCCAGGGCCTCCCGAGCTG  
CTTCCAGGTCCGCGAGCAGTGGACGCTGGCCCTCCAGCTGGCGTTCTAGATTTCTATAGACTATACCTTTATCGAGC  
AGCATAATAAATTTCTGTCTCCCGTTGCGTGAGGTCTCTGTAGAGCGGTTCTGTGCTTGGCCAGCTGTTGCTGCAGCTT  
GGCCTTGTCTGCGGACACCTGGAGGCGGCCCGGCAGTGCCGTGAGCTCTGATTGCAGCCAGCCCAGGGTTCTGGAGA  
CGCTCTCTTCAAGGTTGCGACCGTCCCGCTTCCACACGTCATTCTCAGCAGCTGCAGGTCCCGCAGCTGCCGCTCG  
ACGTGCTTGGCGGCTGGCGGCGGGCGGGCGGGCGGGCGGGCGGGCGGGCTCGGCCGCGTCCGCCAGCCACGGCAGGAACGA  
CTCCTGCGCCAGGCTGAACTTGGCGCAGTGCTCCTGTGGGAGACGAGGGAATTCATTGCTTGTAAAGTTTGTCCCAT  
TTCTCCTTCATGGTGTCCAGTTGCTTCTTGACAATCTCTTGGTCCACGTGCAAGACGAAATGAACGTCTCGCCCAG  
TGTCTTGTGTTCTCATATTCGCCGGATGGCAACAAGATGGCATACTGCAGCGGTGCCCTGAGCGCTGCGCGGTGG  
TCGGGAGGCGCGCGAGGTGCGGGGCGGGCGGGCGGGCGGGCGGGCGGGCGGGCGGGCGGGCGGGCGGGCGGGCGGG  
CGCGAGGCGGGCGGCTCCACGGCGCGCACGCGCTCCACGAACCTCGCCAGCTTGCAGCGCGTGCAGCTCTAAGTACTCCA  
CTTGTGGAGCACCTTTGATCATTAGCCTTTCCAGCATCAGAGTACCCGCTATCAGCGAGTCCCTCCGAGCCCTCT  
CGGTATCTACGATGAGGTCTTCCGCTCCCTCCAGTGCCTTGTAGAAGCGGTTACATCTTCTAGTTGCGCCCTCACG  
GTCTTGATTTGCGGACCTGGTGGCTTTCATGCCGTCCAGCTCTTCTCCAGGTCCGATAGGTGCGTGGAGACGCCTTT  
GACTTTGTCTCATCCACGTATCCATAACGGAGTCTGAGGCTTGTAGAAGGCTCCAGTTTGTGAGGGTATCGT  
CCAGGTCTTGTCTTGGAGCGCGCGGTTCTGTTCAACTTGGCCAGTTGCTTGGGAGACCTTCCACCTTCTCCTTA  
AGCGCGTTCACCTTGTGTTTCTTCTCCAGGTCTTCTCCAGCTGCTGGGTGGAGACACCCTGGAGGGCTGACCG  
GACCAGCCCTGGCCGATCTTATTGAGTGCCTCACGTTCTGGCCGAGGGGCTCCAGCATCGCCTGCTTCCAGCTCGC  
CGAAGTCTTCTGCTGCGATCTGATCTGTTCCACCTCTGAGGAGACCGGCTTCTGTTCTGCAACTGCGCCTTACC  
ACCTTGTAGTCCGCGGAGGGCGGTTTCTGGTTGTTGACCATGTCTCGGTGTGCGCGAGCCACTTCTCCAGCCCCGC  
GAGCGCCTCCGCGAACTTCCCGGACTGCAGCAGCCCCACGTCCAGCCGACGCTCGCGCTCGTTTCATCTTCATAGCCT  
GTTCCAGGTCCAGCATCCGCTGCTGAGCACCTCCAGTGAGGGCGTGAACCTCTGCATGAGCCCTCGGAGCTGCTTC  
TCGATGGCCTTCTCTCGCCGCGTACACCCAGCCGCCACCTCGTTGCCCATCGCGAACAGCGACGACATGGAGTT  
CTGACGGTCCATCAGCATCTTCTTCCAGGAACCTTATGTTCTCTAATCTTCTGCTGTATCTTCTCTTCTGTCAGTGGCA  
CCAGCTCGAGGGACTTAACTTCTCTCTGTGAGTCCGAGCCACTCCACCAACGGTTGTAATTGTTCTTGGAAATAGC  
TTCGCGACCTGTGAGTACCGCTTGCAGTGGTCTGCTAGAGCAGTGGCTTCTGTCGTACCAACCAAGCCCATCAAC  
CATGTGGCTCAGCAGCTTCTCCATGTGCAGCGGACGAACTCGCTTCTTGGCGAGATGCTGCTCCATGCCATCCATCC  
AGGCGCTCAGTCTTGGTGGTCCAGCACCAGGTGTGCGAGGCGCACGCGCGAGCTGTCCAGCAGGGAGCCCGGGAC  
AGGCTGCGGTCCACCAGCGCTTGGTATTTCAATGATTATTGTAGAGTTGCTGCACGAGTGGTTGGGTCTCAGTAGC  
GACTCGCAGCAGCTCTGCGCCGCGGACGTGAGCTGTTGTAGCGCCGCTGCAGCGCGTCCAGCTTGTCTTCCAGCT  
GCAGCGCCTCGTCTCCAGATATGTGCTTTCATCAGCTCCAAGCCGATTCCACCGTGTGTCGACGGCTTCTTGTCTT  
GATGCTATCTCCTCGGTTTTTCTTGGCATAACTGTGGTCCAATCACGTTGATGCTGTCCAAAACAGGTCTGAATTT  
GTGCAGTTCAGCTTCCAGCCTCATGATGTCTTCTCACGCGGCTCCACCGATTGCAAGCAGGTCTCCGCGCTCGACA  
TCCATTCCGTTAGTCTTCTTGTGAGCAGCAGCCGTTCCAGCCTTCTCTGCACCTGCTCGGCGATGGCGTGAAGCG  
GCGGTTGTGCGCGTACTATGCCCTCTATGTGCGTGCAGCCCTCTCCCGGTGAGATCTTCTTAGCCTGGCTGAGCA  
GGTCTCTGGCCCGCACGCGTGCAGCCGCCACGTGCTCAGCCAGGGGGCGGAGCTCCGCCAGCTGCGTGCAGCGCG  
GGGGCGGAGGCCGCGGGGGGCTCCGCACTGCGCAGCCGCGCCTCCGCCCGCGCAGCCACTCGATGAGCTCCTCCAT

GTCGCCTACTACCTCCAGGGAGCGCCGTTGTGCGTGTGCGGCGAAGTGCTCGGCGAGCGGCAGCGCCTGCTCGAGCGC  
GGCGAGGCGGGCGCCGCACAGCGCGCCACCTCGTCCGTGCTCAGCTCGCGCAGCTCACCCGACCGGGAACGGATCGACG  
CCGCCTCCTCTGTGCGACTGGCACTCGCGGATCACCTCGTTCTTGTCTTGTCTGCGCCGCGATGTGGTTCGGGCCGACG  
GCCGGCATGGCCAGCTGCTGCACCTGCTGCTCCATGTGCTCCAGCCACGTGACAGTCTGTTCCAACCTCCTGTTGTC  
TCTGTCTGAGCTCCGCTCTGAGCGCGTTGTACCGCTCGCAGTACCCTCAACTATGTCCTGCACCTTAGCGGAGTCCG  
TCCTCCCCGCAGAGTCCGGCATAGAGCTTCCCCGGTCTTGATCAGCTTGTCCACTAGTGGCTTGTGGCCGTTGATCGA  
TTGTTGCGAGCATTGTATCTTGTGCGGGTGCAGCGGAGACGGGCTCAGCGCGCTGCAGCTGCTCGGCGGCGCCGGCCAG  
CGCGCGGACCATGCCCTCCAGCTTGTCCGCGAACACCGACGACTCTTGCAGCGCTTGTAAAGCTTATCGAGCTTATT  
CCTGATATCCCGGACAGCCGGGTCGCTCTTATTGGCCTTGTGATGACGTTCGGAGGCGGCTCGCTGCACCGCGTTGT  
AGGCCTCCTCGCGCTTGTCCAAGTCTTCTATCAGCGCGTGTGTTCTCCTCTATCTGGTCCCTCAGGCTTGGTGTGGTC  
AATCTCGTGCCTGATCTCCTGCAGCGGACCTGCTGGCGCTGGATGGCGCGCGGGCTGGGCGCGGGGCGCTGGG  
CCGCCAGGGTGTCTCCAGCTCGGCCAGCGTGGCCATGACGGCCTCCAGCTGCGCCAGAACCGCCCGCCAGCTCC  
AGCGCGCTGTCCAGGGAGGGTGCGGTTCGGTGGTGCCTTTCTGGACCTCGTCCCATAGTCTGCAGCGTGTATGGA  
ACTCCATGGCCTTCTCCATAGCATCAATAAGGTTCTCCTCCGCGCTGGCGTACAGCGCGGTGATGTTGTCCAGGCG  
CTGTCCAGGTCCTCCATGTGTTTTCTTCACTTCTGGCTTGTCCGGCTCGCCGCATATCGACATGAGAGTTGAGCCGGT  
CTTGGCGACTTTCTCCACCTGTTTCCAGCGCTTCCAGCTTACCATGTGAGGATCGACTTCGTGCTTGAAGGTGGCCAG  
TTGTGCGATCTGTGCTTCCAGCGTTCGATGTCCGATCCCAGAGGACCCATGCGGGAGAACTTGTCTCCGCTTTGT  
CCAGGAACTCTTGGAGATTCCGGCGTGAGAGTATCCAAGGTGTGCTGGTATGCTGTATCCAGGCGAGGGTATCTCTC  
AACCGTGTGCTGCAGTTGTCCAGCCGCGAGCAGCGCCGCTCCAGCTGCTGCTGCCGCTCCACCATGCCGCGCAGCAA  
CGCGGACCACCGAGCGTTCACTTCGGTTAGAGGTTGCTTGGATCGCCGCGCTTGTCTGATGACGTGCGCTCTGTCA  
GCTCCGCTGCTTGTGAATGTGTTTGTACCGGTGGCATGATGTATAATCTGTGCTCCAGCCTCGTTGAGGGTGTGCAC  
GGAGGCTGGTGAGCAGCGATGTGCTTACCAGCACCTTTAGCTTGGCCAGCTCCACCTCCAGGATCTGGGGGTGCG  
CCGCCACCTTGGAGTGACATTGTCCATCTGGACTTAAGATTCTTCCAGATTAAGGTGCAGCTGCGAGGTGGGGTTGG  
GTTTTCTCCTGTGCTTGTGATGTACTCCTGGCCCTGCTGCAGGACGGCTTCCACCTTTGGACGGTTCGTCTCTATCTCG  
TTGTACACTTCTCAACAAGGTTTCCATAACCCTGGAGACGGGTTTGGCGGACGTCAGGGTCTTCTCGGCGCTGGTGA  
GCCAGTCGACAAAGGCTGGAGGGCGTGTGGAACCTCCGTGGCCTCCTTCAAAGCTATCTCCAGCTTGTATCTTCTTG  
TCTGAGGCCACATATCGCTAAACTCCTTAGCCTCCTTGAACCCATGGTCTAACGCCCTGGTCTCTCCGCGACCTT  
GGAGACTACGCGCTCCCAGCGATGTGTACAGACACCAGGAGGTTCTTGTATGAGGATGACATCTGCTTCTGGCTGA  
AGTACTTCCAGTGGGTGCCCTTCTTGTCCAGCTGGAGCATGCTCTCCCGGTGCGTTGATACCTCTTTTGAAGGAC  
TTGTGCTCTTCCGATTTGAGCTCTGTTTGTATCTTCCGGGTGCTTAAACCGTTGGTTCCGAGTTTCAAGTTCGTCAGCT  
GTTGTTCCGTGTGTTGAGCCAGTTTATCAGATTATTCTGTCAACAGCCTTAGAGCAGACGGTGGTCCACTTGGTC  
TTGAGGTCCGCGAGCATTGTCTCAGCGTGGGCTCGTGGTCTTCCGAGCCTTGTCTTCCAGCGCCTTACCCGCTTT  
GCTGGCCTGGTGTGATAATGGCTGCTTGGCGGCAAGGGCCTTTTGAACCTCGCGGTGTTTGTCTTAACTTATGCTGT  
TCGATGAGCGCCATGACGGTGTCCAGGTCTCCGTGGACGGGAGAGTCCGCGGACAGCTCCCGCTCCTGTCTCCGCGAG  
CCACTCCAGCAGAGCCGACATCGCGTCTTGAACCTGACCGGAGTACAGCAACGCCTCTTCCAGCCTGCGTTGTGCTT  
GCTTCCGAGATCTTTTCCAGTTTTTCCAGTACCAGTGCATCTGTTGCTCGCGCGAGTGCAGATCTTCTCGAATTGCTC  
CTTGGAGAGCGCTCTCCAGCCTGTGCGCCTTCTTCTCGCTGAGCGCGTGCACGGCGTCCCACGCCTGCTTCCAGCTCCG  
AGCACTGCTGCTTGTGCTGCGCCGCTCCTCCTTCCGACCTCGTCCCACCGCTCTGTATGATCGTGATCCAATGT  
TTGATGACCGTCACTGCGTCCGGATGAGCCTTAGACAAAATCGCGTGGAGTAAACCGGATGGTGTGCTTTTATCCCG  
TCTCTTCTCCGTGAGCTCCTTAGCGAATCTCTCGTGCTCCAGCAGCTGTTGCCTGGTGTGCTGTTCCGCTTCCAGGCA  
GCTGGCCGGCGAAGCGGAGCTTCTGCTCGGCGTCCGAGAGCCACTCGAGGAGCATGTTCCAGGATTTGTGGAGCCGT  
TCCGCGAGGCAAGGTGTTCTCGAGGCCGGCGAGCCACTGCAGCAGCTCCTCCAGCACCAGGTCCAAGTCTTTCCAGGC  
TCTGCAGGTGCGTCTCCAGCTTGTGCGCGGTTGCATCGCCCATTGCCATACTGGTATGCCTTGCAGACGCGGTGCG  
ACTTCATTCTGCCTCTTCTGCGTGTGGTCCATGAGGTCTTTGTGGTCTTCCGATGAGGCCTTCTAGTAACTCGATCGA  
CTCCGGTAGCGGTTCTGATTCCAATGCCAGGCGCTCCCTTCCGCGCCGCTTGGCTGATATCTTGCAGCGGAGTGGAC  
TCCC GCCGACGCTTTGGCTCTTACCTGTAGCGCTAGTTCCATAATAGTCCGGTGTATACGGACCTCTCCCTATGC  
AGGTGCTGTTGGGATCCGCGCTTCCCTTCCGCGGGAACCGTGGGCGGTAGTGCAGGACGCTTCCGCGGAGTCCGCG  
GCCGGGGCTCACGCGACCGCTTTCTCCAGTCTCCAGCTGAGTGAAGTTGGACACCCTTTGCAGTTCCCTCAAGTGCAGCG  
AGACGCTCGTGCAGCCGTCTCTGTCTCTCCACGCGAGGAGCCACACTGTACGCCACTTGTCCACAATTGCTTCCAC  
GCGTGGCGATCTGAACTCAGGCTCGGCGCCTTTGTGGTGTGATAATTCCGTGATGAACTCGTTTCTGGGGATGAG  
GCCGTTGTTGCTTGTCCATCTTGCAGGAAAGGTCCGTCCAGGCGGACTTCTTGTGGTTCATGAACTTGGAGGAACC  
AGTCAGGGCGGAGGGCGGCAATGAACTCTTCCAGTCAATGAGCCCGCGCCATTCTGTGCAACAGGTCCGCCACT  
GCGCCCATCTCTAGTCCGGAGGTGTGCAATTCCGGTACTTGCCTCGCCGACCTGGAACACCCTGAACTTCTGCCGG  
CAGGTGCACAGCATCACGAGACGCTTCCACTCATCGTGGATCTTATCTGCGTCCGTCCGCGGGCCTCGGCGTTCCAC  
CTCTGCAGGGGTGCTTCTTACGAGGAACTCATCGAGCGCCACCCAGCCGCGCCACGCGGACCATCACCGTGGAG  
CGGAGGATGCGGACCAGACGGAGCTTCTGGGAGTCCCGAACTTGGTAATAGGTCCAGTGGACGGAGGCGTGTGTTGT  
GTTAGAGCGGGGCGTACGCGGTCTGAACGCAGCCATGCTCTGGGACACTCCCTCGGCCAGTATGAATTGTTCCCGCA

GTTTCGATGTTTCGTGCGTCCCTTGGCTCGGTACACTAGGTTTCTGTATCTAGATCCAAGTCCACTAGCGGCCTCGTT  
GTCGCTCAAAGAATCGGGCGTCCCTGCACTGAGGGATGATCTTGACGCTCTTCCGGCAGCTCCACCCGCGGACATTG  
GCACTGAGCGAGCTGTTTCGCTCTCTTACCTGTACTGTCAAGGGATAGATTTCGATCCATGCCTAGACGGTGGCTTGG  
CCCTGCTCTTGATCCTGGTCTGGAACCTGGTTCGAGATCCTCCGGGTGTTAGAGTTGACCTTCCACTGGCCGGCGTCA  
ACAGCCCAGTGGGCGTTTCGCGGTTCGCGAGCCGTTGGGCGTGGCGGTGCCTAGCTTACTGGCCGTGGCCGCCGCGCG  
GCCACCGACGCCCCGAGTGTTCGTCACCTTGGCGATTGGAATTCCTTGATGGTGTGGATACGTCATCTCACTAGTGCCG  
GCACCGGGGATAGTGTTCGGTATGCTGGACGTGCGGTACATCCCTCCGCTAGTATAACCTTTGATGTCTCGCTGCGTC  
GGTTTTGACGCTTCCCCGCTCGACTCGCTTATATTACTCTCATATTCATTGTTCGCTCGTCATTCCCAGATATGCTGAA  
TAGCGAGGAGTTCGCTCTTCTGGACTTCTCTGGTCCGATTTAGGATCTTGGGAAGTGGGGCTAGGTTCTTGAGAGGTTT  
CCCTAGAGTGTAGATTTTTGGGATTTCTTTCCACGCCTTTCTACAGACGGCGTTTCGTTGTGAACGGTTACCGACATAA  
ATGGGTATCTTTGTGGAACCTTGAGTTTGGAAATGCTGGGTGAGTATGGGATAAGGATTTGGGATGGTCAGACGCCAT  
CGACGATGGCTGGGAATGTGTAGAGCTAAAGTCGGAATGGTTTCGCGTTTCTCCGTAGTTTCGAGATGATGCCGGAGTA  
CCGCGTTCGGGACACGGGTGTGGCAGGTGCTCCGGTGTCCGAAGCATCGGATGGTTTACGTAACAGCTTCGATGCGGC  
GGTCTGTTGTCCCGACGCACTGGTGTCTACTGCCTGATGGTGTCTTTTGC

>aly208.2:G145T,T146G

ATGGCGACTGACCAAGGAAAAAACCGCATGCATGTCTTCAAGAATACGGGCAAAGATGTCGATGAAATGCGTAGACG  
AAGGAACGTAGTAACAGTGGAGCTCCGAAAGAATAAAAGAGACGAGACATTACAGAAGCGTCGGAATGTTCGGATCA  
GCGACTCGACGGACGAAGACGAGATCGAGCGAAGCTTGGCAACGACTGATTTCAAACAATTGGTGATAAACGCTGCG  
AACGCTGAAAACGGGCCGCTGCAGTTGGCCGCGGTGCAGCAATGTCGCAAATTGCTCTCTTCCGACAAGAACCCGCC  
CATCGACGACCTCATCCACCACGGCATCCTTCCCGTCTCTGTCGCGTGCCTGTTCGCGGGCGGACAACCTCGACGCTCC  
AGTTTCGAAGCGGCCTGGGCTCTTACGAACATCGCATCGGGTACCTCCGCACAGACGAACAAAGTGGTCCACGCTGGC  
GCAGTGGCCCTATTCTGCAACTGCTCATGTGCGCCGACGAGAACGTATGCGAGCAGGCTGTCTGGGCGCTCGGCAA  
CATCATAGGAGACGGCCCAGTGTCTCAGGGATTTCTGTTGTAGAGCTGGGTGTGGTGAAACCCCTTCTGAGCTTCATCA  
AACCAGAAATCCCAATCTCATTCTTCCGCAATGTCACATGGGTAATTGTCAACCTGTGCAGGAGTAAGGATCCTCCC  
CCACCAGTCAAGACTATCCAAGAAATTCTGCCAGCTCTTAGTGTGCTCATCATGCATACGGACATTAGTATTCTAGT  
AGACACAGTATGGGCAATCAGCTATCTCACAGACGGAGGTAATGATCAGATTAGATGGTGAATCTGGCATCG  
TACCCAAGTTGATTCCCCTGCTTTTCGCACAAGGAGGTGAAGGTACAAACGGCGGCCCTACGAGCTGTTGGCAATATT  
GTAACGGGCACAGATGATCAGACACAAGTGGTGTCTTAACTGCGACGCGCTCTCACACTTCCCAGCTCTCTGTGACA  
CCAGAAAGAAAAGATTTGCAAGGAGGCTGTGTGTTCTTCTGCAACATCACTGCGGGCAACAGCACCAGGTGCAAG  
CGGTGATCGACGCTGGGCTGCTGCCAAGATCGTGGAGAACCTCGGCAAGGGCGAGTTCCAGACGCAGAAGGAGGCC  
GCGTGGGCCGTGTCCAACCTCAGCATCAGCGGCACCAAGAGCAGGTGGCCGCGCTCATCAACTGCGGCGTCATCCC  
GCCCTTCTGCAACCTGCTCAGCTGCAAGGACACGCAGGTATCAATGTTGTTCTTGATGGCTTGAGCAATATGCTGA  
AGATGGCCGGCGAGAACTTGGAGCAGGTGGCCAATATGATTGAGGAGTGCGGGGGTATCGACAAGATTGAAGCATT  
CAAGGCCATGAGACCGTGGAGATATACAAGTTGGCCTATGACATCATCGAACAATACTTTGCGGGAGAGGAGGAGGA  
CGCGACGCTGGTGCAGGCGGCGCAGGAGGCGGCCCTTCCAGTTCGACCCGGCGGCGGGCGGCCCGCACGACGGCTTCC  
GCTTCTAG

>aly3478.6:T116C

TCAGAAAATTTGGGAGCACTGAGAGGTCTTCGTATTTGCGGTGACTGTATGCTCCAATTGGGCCAACGCCGTCAACT  
CCGTGTCCATCTTTCTGCTCTTGATCCTCATATTTTTTATTATATATGCTCTTTTTTTCGACAACAGCACAGAATCTCC  
TCGAATTCCTTCTGAAGTTATCATTCAACCAGCCGTACAAAAGAGGGTTAGAGACTGCGCTTGACATCCCAAACAT  
GTGACAAATAGCGTACGTTATTGTCAACGTTTTCTCATCAAGGATCGCTTCTGTACTGAAATCGGCGACTAGATTGA  
ATACATTCAAGGGCAACCAACTTATCACGTAGGTGACAGCTATCGCTATGAGGATAGCTGGAGTTTTCTCGTCTGTT  
CGCCTTCTTCTCGCAATCGTCTATGGATTTGGACATGAGCTATAACTACAAC TAGA ACTGGCAAGAGGTA CTGGAA  
GACAAGACTAAATAGTGTAGTAGATAGCCCTTCTTTTCGCGATGGGCCATTCTTCTATGCAGAAGTGTAAAGCTTTTCA  
TGCCTATGAGACCGACTTCGTGAGTCTTGATGGTTCTGAAGATATAGAGAGGTGATGCCAGAGCAAATGCTGTGCC  
CAGATGAAGAACATGGTGTGATGAGAGCTCCCAT

>aly103.23:796A(not\_G)

AGCGATCGCACAAAGCTTCTGTCCAGGATACGTCTGGCACC ACTCAGCACCCGCGGCATCATACTTGCTGTGACGCG  
GGTACTTTTTTCACTATGTCCCAGTGTATCATCCAGACTTATATGCTTGATGGCCAGCCACC GCCCGCCAGCTAAC  
AAAACATTATTTCCGGAGTAGTCAACGGACATCGCCGTGCGCTGCAACTCTCGGTATTTCCATTTTATTATCTCTGA  
ACTCCAATGCACAGACATCAACAGCACAAAGTGATAAACTGGTTTTTCTTGATCTCGTAAGTCCCATAAAATGTGTA  
AATGTGTCAATGGAGCAAGTGGCAATCAAGTTGTGGTCTGTCTGTGAAAATGTGTGTCACTGACTACTCGAGTGTG  
TCCCCTCAGAGAGCATATACAGGTTAAATCATTCCCTGCCCGCCACTCATAAACATCAACACGTTGGTTACTACTCA  
CTGTTATTATCATCATCATTATCAGCCTCATCAGGCAAATAATGGAAGCACATTTTTTAAAAGAGATGGATGCATCGT

CCACACTCTTAGAGACTGATCCCTTCCCCATGTGACCAGTTGATAATTTGAGGGCTGTGTGTTTTGGTCGCCACACCA  
TTGTCTGAACTGTGTCACTGTGCCACCAACCTGTGAGTCAAAGTACCCTCGACCCATATTCCAATAACCCAGCC  
TGTTCCACCCTTGGTAACCCACCCCAACCTACCCCAATAGTTAAGAGACCACTACCAAATGGTGTGTAAATAGCTCT  
CCAAACTGGAAAATTAGTCATTATTAATATTCTCTGGTCTTCTTCCATTATTAATATCAAATACTTTATGCTGCCAT  
CATGGCTTGATGTCACCAATTGGTATTTCATGATGTGGACTCCAATCAACTCCATGAATTTTACACAAATGAGCAGAT  
ATATAATGTACGGGAGCTGCACTTTTTTCGGTAATCCCAAATCTTTATGTCACCATCATGTGCTGTTGCCACTATGTG  
GGATGCCACCTTATTCCATTGTACCTGTGATGCACCAGCATTGGATTTCTTGGCCCTTAGAGTCGCTAGAGAGATC  
ATTGACCGAACAGCAGTAGATGCATAGCTTATTCATCAATAGAGGTGCTAACGTCTTCAAACAGTGTAAAGAGACA  
TCTGTGTCCTTCTTTTTCTTTTCGATACGCGGTTCTGTTAATAGCTTGGAGTATTTAATAGTCGTGGCGCTATCCA  
CATTAGTTCCTGAAAGCCACGAAAATTTGGGTATTGTCTGTTCCGTGACATTTCTGGGGAATGTCACTTGTAAATTG  
GCAGTGTAAACATTGCGTTCTGAGTGGATCTGACACGTCTTGTCTCTATGTTTCAATCTGTTACTTCTATATTAGC  
CATCTCGCTATTGACTCAAATTTCTCATCAATAGATGTAGTTACTTTTGTGCGCTAGTTTTGTCTGGGCGTGCCTCGT  
TTCGTGTTTTCAACGACAACCGTCGAGCGTTTCGGTGGCCGGTTGAATACAACCTAGAGTGCTAACTCCACACCATGTAG  
CGCCGCATGTCCGTGGAAACGGTATGCAGGAGTCGCCGGCGTTCTCGCTCTCTGACTGACTACGTTGGCTCGATTTT  
ATCGAGTCTGAATCGTCGCTGGACTTTACTGGTATCCATCTATCCTGAAAATAGAAGGTGGTGTAGGAGTTAGACGC  
GTGTCCGGTGTAGTAGCTGTGGGAAGCCGGACGCGTGGTTCGGCGACGGCGTGGTGGTTCGCGTGCAGGGGACACCGAGC  
TGAACCCCGCTCCAAACAGACCTGGTGTGACGACAGCGATGACATTGACCTACGGGGTGTTCGGCGTTGATGACGT  
ACTTCTCGGCGAGCGCGCGGCTGAAGGGGAAGAGCGCGTCCGCGCGTACAGCACGACGCGCGCGCCGCGCAGCCC  
GAGATGCTGCCGCGACTGCGCATGCTGCCCAGCGCAGACTCTGCGCTTTAGCGCTTGCAGCATGTTGCAGCACAGG  
GGATGAGCAGCCAGTTTCATGGTCTCCTCGCTGGAGGTGAGGTGGTCCACGGGCTGCGCGCCAGCGAGCGCGCCAC  
CAGCGCCGCGAGGTTCCACGAGTGGGCCAACTCGCATTACCTTCTCTGATGCTACCTTTGCGTTGCGTTTCGCACA  
TTTACAACCTAGATGTGCTTATCGTTGAATCCGAACCTAGAATTACTCGTGTGCTTGAAGACAGAGAAGGCACATGCGA  
GCATGGCCGCCATCTGTATGTCAGATGCCTTGGCGTAGTGTGAAATTTCTAGTTTTCTTATAAAGCAATTGCCACCT  
ATGCAGTATATCAGCGTACGCCCCTTTGAAACAATGATACAAATGCACTGTGGCCTCGTCTAACACGCATACTGAGG  
CTCTATCAGACTTGGATAAGGTGGTATCAGTATGAAAGTTTTTCGGCCTCTGAGCAAGAGTTGCTACGTAGGATGGGC  
AGGGTCCAACCATCCGCGCTGATCTCGCTGTACTGATTAATTGTGCTATACGGGGATGTGCTGTTTTCCGCGCCGCAC  
GCCGCGCCGCGCACGCGCGCGCCGCACCCGCGCACGCCAGCCGCGCCCTCGCCCGCCTCGCCCGCGCCCGCGCC  
CGCCCGCATGCGCACAGCTTTCATCACTTAACCAAGTGTGTCATATGTGCGACATGTCCCGCGTGCACAGAGCGCG  
CAAGCAACATCCAGTGCACACATCGTTGCTTGGTCTAACTTTTGTGTCAAAATCGCTATAAAGTCTATATCGGTAT  
AAGTACTTAACCAAGTGCAGCATGTGCGTGGCGTGTCCGCGTGCACAGAGCTCAGAGGTATCGGCCAGCGCGCC  
CATTTTCGAGCTTGTCTATTGGTCCAATTTGTGAACGTAGACAACCTTCACTTGCTTAATTTCTTTTTCACTATTCT  
TTTTGATCCTATTG

>aly276665.26:A192G

ATGGCCAACGATTTGTGGTTCATGTACCTGTTGTACGGAGGCGCTGACTTGGTGGTTGCGCCTCAAGCTGTGCGCGGA  
GGAGATAGAACAGAGGTACCGGAGCAAGGAGATCGACAGAATACTCGAGAAGGACAAGCAGACGCTGCGGCGTCAAG  
TCAAACCTTTTGTACTCGGTGCGGGTGAAGCGGAAAATCAACATTTCTGAAACAGATGAGGATAATACACAAAGTG  
AAGTTTCGAGCCGGAACCTGGTGCAGGATACCAGCACGTGATATACCAGAACATTTGTGAAAGGGATACAGGTGTTGGT  
GGACGCTAGGGACAAGTTGGCGATACCGTGGGAGAACCCTCGGAACCTAGACGTTGGACAGCAGGCGTTGCACTTCA  
ACAGCACGGCGTTCGCTCGACAGCCGGCTGTTTCATGCACTACGCGCCACACATCCACTCCCTGTGGCTCGACAGGGCC  
ATCAAAGAGCTTACGACAGGCGAAGAGAGTTTTCAATTGAGTACTCAGTACTACTTCTCGGGGAACCTGGAGCG  
CATAGCGCGGCCGGACTACGTACCCTCGCACCAAGACATCCTGCACTGTGCGAAAGCCACCAAGGGCATCACCGAGT  
GCACCATCAACATTAACAATGTGCCATTCGTGTTCTGTCGACGTGCGGCGGTGAGAGGACGCAGCGACAGAAATGGACG  
CAGTGTTCGATTCCGGTACGTCGATATTGTTTCTCGTGTGTCGTCGTCGGAGTTTGACCAGGTGTTGTGCGGAAGATAG  
GAAAACGAATCGTCTGGAGGAGGCGCTCAACATCTTCGACACGATCGTGAACAACATAAACTTTAAGGGCATCTCGA  
TAATCCTGTTTTCTAAACAAATCCGACTTGTTCGGAAGAAAGTTGCCAGCAAGGAGACCGACATACGTTGGTATTAC  
CCCCAGTTCACTGGCGATCCTCACAAATCTGCGCGATGTTCAAATGTTTCTTAAACATGTTTCGCGAACGTTCCGGAG  
GGAGCCGAAGACCACCCTTACCACCACTTTCAGCAGCCATAGACACGCATAACATAGAAGTTGTTTTCAACTCTG  
TCAAAGACACGATTTCAATCGAACCTCGAGTCCCTGATGCTCCAGTGA

>aly37338.38:G133T,G134C

ATGGGTGTTCCAGCATTCTTTTCGTTGGCTCAGCCGCAAATACCCGAGTGTGATCGTAGAATGTGTTGAACAGAGGCC  
AACCGACGTAGATGGTCAACTAGTGTATGTGGACTCTTCAATTACCAAATCCTAATGGGATAGAATTTGACAATTTAT  
ACTTGGACATGAACGGCATCATTTCATCCATGCACGCACCCAGAGGACAAGCCGCCTCCGAAGGACGAGGACGAGATG  
ATGGTAGCCATCTTCGAGTGCATCGACAGGCTGTTCCGTATCGTGGAGGCCAGGAAGCTGCTGTACATGGCTATTGA  
TGGAGTGGCCCTAGAGCTAAAATGAACCAGCAGAGATCCCGGCGATTCCGAGCCTCCAAGGAGACCCAGGAGAAGA  
TTGAGGAGATAGCTCGTATCCGGTCTGAGCTGCAAGCTAAAGGTGCCTACCTTCCCCCTGAGAGGCCCAAGGAAGCT

CACTTTGACTCCAAGTGTATTACACCAGGAACCCATTTCATGGACAGACTTAGCAAGTGCCTTCATTATTATATACA  
TGACAGGTTAAATAGTGACCCGGGCTGGAAAGGTATTAAGGTCATCCTCTCAGACGCCAATGTGCCTGGTGAGGGTG  
AACACAAAATTATGGATTACATTAGGAGACAGCGTGCCCAACCAGACCATGACCCCAACACACAACATGTGTTATGT  
GGAGCTGATGCAGATTTGATCATGTTGGGGCTTGCCACACATGAGCCCAATTTTACTATTATCCGTGAAGAATTCAA  
ACCGAATAAACCAAGGCCCTGTGATGTTTGTGGTCAATTGGGTACGAGATGAAAGAATGTACCGGCAGCAGCCAG  
ACGCGGGCGCTGGTCCGCTCCGACCCAGCCTTTGGAAACCAGGACAATTTTCATCTTCGTGCGGTTGCCAGTCTCCGC  
GAGTACCTGGAGAAGGAACTCCAGATGCCCAACCTGCCATTCCCATACGACTTTGAGAGAGCCCTTGATGATTGGGT  
GTTTATGTGCTTCTTTGTGGGGAACGACTTCCTGCCGCATCTGCCAGTTTGGAGATCAGGGAGGGTGCGGTGGACA  
GGCTGGTTAATCTGTACAAGAAGTGTGTTTATAAGACCAGGGGCTGGATCACGGTGTGAGGCGACGTGAATCTGGAG  
CGAGTTACAGGTGATCATGGACGAGCTGGGCCGAGTGGAGGACGAGATTTTCCGCCCGCCATCAGAACGAGCTGGG  
CTTCAAAGCGCGGAAAAGGCCAAGAAGCAGCAGAAGATCAACTTCGCGCTGTGAGAAGACGCAAGTTCCGCGCTA  
TGGCCCTGGGCGGTGTTCCCGGTCGGTGCAGAACGCGCGGCAAGAGGCAGCTGATATACGTAAAGCGGGCATGCAG  
GCGGTTGCAGCGCAAGAAGAGGAACAAAAGCGGGTAAGAAGCGGTGAGCGACCGCCGAGGACTGGACTCTGACGA  
TGATGACGAAAAACACGACGAGGTGCGGCTGTGGGAGGAGGGCTTCAAGGAGCGCTATTACGAGAGCAAGTTTGAAG  
TGAGCCGCGACAACCTCGAGTTCAGGTATCGCGTGGCACTGCAATACGTCCGCGGGCTCTGCTGGGTGCTCCGCTAC  
TACTACCAGGGCTGCGCTTCATGGAAGTGGTACTTCCCTTACCCTACGCGCCCTTCGCGTGGATTGTTGTCATAT  
CTGCGGTCTCTCCACTAAGTTCGAGAAGGGCACGCAACCGTTCAGGCCTCTAGAGCAATTGATGGGCGTGTCCCGG  
CGGCCAGTTCCCAACACGTGCCTAGGCCTTTGGGCGAAGCTAATGAGTGATCCATTTTCGCCGATCATCGATTTCTAC  
CCGACGGACTTTAAAATCGACCTGAACGGCAAGAAGTTCGCGTGGCAAGGCGTGCCTTTGTTGCCCTTTGTGGATGA  
GAACAGGTTGTTCAAGGCACTCGAGCCCTATTACAAGGAGCTGTACAGGCTGAAATCCAGCGCAACATCCGCGGCA  
ACGACCGGCTGTACGTGGGCACGGGCAACGCGAGCTACGAGACGCTGCGGGCGCTGGCGCGCGCCGCCGACGCG  
CGCCACCCCTTCCGCGCGGAGGGCGTGCAGCGGCGACGTATGTACAGCGCCGACTGCGTGTGCTACGGCGGGCAACT  
AGCGTCTCCCGTATTGGGTTGGAGCCAGTGTGGACAATCAGGCGGTGTGCGTGCCTTCCAGGACCCACAGTACC  
CAGAGGACTTCGTGTTCCCGCGAGCCGGCTGCGGGGTGCCACGGAGCCGCCAGGGTGTCAAGCCGGGGAACCTC  
TCGCATCAGGAGAACAGGAACTGGAGGCCGAGATTGGCATGGTCCGGTTCGAACACGGTGGCGTTCGCTGGAGGCGGC  
GGGCCACCGCATGCTGGGCCACTCGCTGCCGCGGACCGCCAGTACGGTCCGTGCCGCCGCCGCCGCCGCGGACCGC  
ATCTGAGTCGTTCAAAAACGTTCCGGCCGCGAGCGTAGCGGCTACTTACCATATCAGGAACAAGCCCACGGAAGCCAG  
GGCTACGGGCAAGACCGCCATAACCAGCCCGTTCGGCTATGGCTCCAACCAGGGCTACCAGACGGGGGCAAAACCG  
GCAAGGATCAAAATAACACCGTTCAAACCAAGGTTACAGAGTACCAATCGAACAAAACCGTTCCGGTTACC  
AAACGAACAGTATAAACAACAGTACAGAAACCAAGGTTACAAGCCGTACCAGCCGGGGGCGAGTACGGGG  
CACAGTCAAGGCTATTACAGCAGGGTAATCCAGGTACCAAGGTCGCGAGAAGTATCAGAGTGGGAACCTCCAGGG  
CTCGGATCGGAGGCTCCGACGTGGAACCGTAATCAGGGGAACCTCCACGTGGCGTTAA

>aly65.4:C330A

TCTTTAATAATAACCATAGGAACACAAAAAGAACAAACTGACAAATCTGTGTCGATAGCAATGGCACGCGTGACAAC  
GCACATCTGCTTGCAACTCTGCTAATGTTTCAGCTAATGTCTCTGTCAAAAGTACCCCATTTCTCCTAATTGTCCAGCA  
ATCGGTGGTAGATCTACCTCTTTGGCCTCTTCGTGTTCTGTTCCAGTTTTCAGCTTCAACTTGCCACCGGGCAAGGT  
GAACCTCTCGCCCGGCACAGCCATCTCTTGTAAAGACATTTAACAATAACGGAGTTTGGACCAAACATTGGATTACAG  
AATTAATAAAGCATGTGTTTCCTAAATTAGTTAGACCTCTGACCCTCGGCAAACCTGATGGCCATTGCTTTGTCCTTT  
CCTTTTAACTCTGTTTTGATTATAGTCTCTGTTATATTTGGATCATCTAAACTGTTAGCGGCTTTTGCATCATAGAA  
GAGTTCAATTGGTGGGAGCTTAGGGTTGCCATTGGCCTGCTTCTTGAGGTAATCTATACACTCATGCAACTTCTTTG  
CACTAGATGCAGTTACTTTCATTGTTGCAATAGTAACAGTAAATACCCCAAGTGGTGGTGTGGCTGTGAGAGCATGG  
CAATCAGAGTGGGGGGTGTGAAATGGTTCAGGGCGTGCTTGTACGTGCTCGGCCACATAGTTGCGTGCCGACGCG  
CAAGCACATCCATAAAGACAAGTCTCTCGAAATTCGGATCTTCTACTTCTGTTTTGGGACTCTTTTTGCATTCCG  
AGCACTCCTTCTCGAAGCCGCCCGTCTTTAGAGCCTTTTTAGTTTTCGTGAGATCGACTGCTTTTCGCGACGTGAGGG  
CATGCGGACTTCACGGTTTCGTGCAAGATTCCGTGGACTCGTCCCGTTCCTGCTAGGGTTCGCTCTGTCTCTTTTT  
CTTAACCAATTGTCGCTTAAATCGGGCAGCGGACCCCTGACAGCTTCGAGCAGATGCCCGAGGAGCTCATGGGAGT  
CATGCTGATCACCACTCCGAACCTGTGGCAATTTGTTCTACTAACCCGAGAGAAGCTTCTTTGGTGTGTACACCCCA  
CCTTTCGCTGCTCTGGCCTCAACATAGTATCTGAAGTTGCTGTCCATAAAAATTTGACTTTTCTGCTTAACTTCGCCG  
TCAACCTTTGCGGGATCCACTTTGGAGCTCATACCGAGGCTCTGAAGGATTACAGACTGGTAACGACGAGATCCTC  
TGACCGTTGGGTGTTTTCTACGGACGACGGCGGGGGGTTGCGGACGGCACGCGGCCACGGGCAGCGACAGGTCTAG  
GAAGTATCCACACGGTCAGACTGGTGGAAAGCACTCCTGGCACTCGAGAGTAGACACGAGGAACCCACGGAATACCT  
TTATTTTTGCGCGCCGCTTTTTTCGACGCAATTTCTTTCTTTCAGCTGATGTTTAGACGGTTTGTGTTCTTCAAC  
CGAATTGTACGAATTCTCTTCTATAGGATCCGCTCGTAGAACAGAAGGTAGGCCTGCGCGCGGAGCACCTTCTCCTC  
GCTCACCTCCGACACCATGCTGTCCGACACGTAGTACCCTTGGCGGGCGGCGCTCCGGGGCCGCGCCCTCGCCCG  
ACTCGTAACCGGACAGCTCGGAATCGGAATCGGCTGTGCGTGCCTCCGCCCGGGGAACGTTAGGTGTGTCGCG  
GCTGGCTGGTTGGCCCCGCGAGGCAAAAAGCTACGGCGACTGTGCCCCGCGCGGACCTTAACGTAGGCTACGTAGTG

TCCGCCGTGCATTCCCCCTGAATGCTCCACCACGCCGTACAGTGAGTACAGCAACTCGGTCTGCCCGCGGCCAAGT  
TCGACACCTTCTTCAGCTTGTCCATCGCGCAGAACGGCGCCAGATCCAATACCGTTGGAAAGTCTACGTGCTTCGAC  
ATCTTTCGGAACATGCAGCGGGTCCGATCTGGAAGCGCTTCAGATGCAGGATGAGGATGGCTGGCGGACTCGATAC  
GAGGAAGCGCTTCGTTGCATTTCGTATACACGGTCTTTCCGTCTTTTCCGTTGATGCGTTTCAGTGCACGTTTTCGCAGC  
CGACCTTGTTCCTCCCGTGAGGAGCTCGAGAGCGGTGAACTGGCTCAGACAGGACTGGACGCTACATTTCGTTCGTCG  
TCGCAAACATATCGTGGAGACAGCGGACTTTGGCGCGAGAACGACAGGATATCCCGCGGTACGTGTTTTTCAGCTTC  
AATGTTGTAATCTTTGGGCGTGGCACTGAGGGCGGAGACTCCAGCGGGCCAGGTTTCGGGCGGGCTGTCCGGTCCCA  
CCGGCGAGGGATAAGTAGGCTTAGTTTTCACTTCGGCCATATCGAGTTTCAACTTGTCCAACCTTATTCGTAACATCG  
TGATGATTATTAATATCGTTATATAAGGACTCCTGCGACCCATGGTGATTGTATTTCGGAATTAAGGAGAATGTCTTT  
GGATCCAGACGCCCCAAGATCGCGCGAACCAATATCATTGGTGTATTCTGGAGCAAATGATATCCTCGAAACCGGCC  
TAGCCTCTTCATTTTTGTATGGCGATAACTTACTGTAGTTGCGCACTGGATAAGTCCAAGTTAATTCGCTTGAAGC  
GAGCTATGACTGCCTAATCTTTGCCGTTGATGGGAGACTCAACGTTGTTCGACCGTCTCTGTGCAATTTGTGTTAGT  
GGCTTCGGACTCGCACTCCAGAGTCCAGGATTTGACAAGTTCTCGAGGGAGATGAGCGGCTTGTAGTCTAGCGGAA  
CGGCTGAAGCCACGGTGTCTTCGAACTCTACTTTGTCTTGTTCGGTGGATTCCGGAGTATTATCGGTCTTCTCTTTG  
TCCAAATCCACTGGACTGGTGCATGAGTCTGAGCTGATGACTTTTTCTGAATTGTAGCCAGATTCCATGTGGTA  
GGCAGCGAAGTTGGCGCGGTGTGGGCCACGGGCTGGCTTGCACGTCGGGCGGTTCGGGGCACATCTTCCAAATTAT  
CCTCCACATCTGCGTCAGATTGTTTCAAGATGACTTGCCGTCTTCTTTAGCACCATTTGGTCTCCCCGCACTTATCT  
TTAGGGGTGGTAC

>aly11945.11:G391A

CTGACGGTGTTCGCAAGAGTGCCATTAGTGACCGCCTCGAGCTCGGAGGGCACCGGGTCCGCTCGGGCACGGTGCC  
CCGCGACACGTGCACCGGATCCACGCAGCGCTTCGGCAGCGGCATCGGTCTATCCTCGCCTGCAGCACGTTAGTCCCT  
CTCCGCCAGGTTGGTTCGCTTCCCGCGTCAACTCGCCGAACATATCCTCTGCATGTTTCGATAGTGAAGACAATTGTC  
TTCTTCCCCCTATCGTGTGGATGCGCTCAGTATCCTGCAGCATCTCCCTGCGCCACAGCTCGAAGAAGTAATCCGG  
ATCAGTGTAGAACTTCCCTCGCGTCCCGTCCGTCGTCTCTGAACTCATTGAGTTTTCTCCAACGGCGGGCGGTTCGGTTCGC  
ATCTTTCGCTACGTTCGCGAGCATCGCCGACGGCATACTGTTCCCTCGAGAACAGTTGCTGTTGGAACGTCCTCGACGAG  
CGGAACGCCTTGCGCATTTGTATGTCTTGCAGCGAACTGGAAACGAGACGAACACTTTTTCTTACAGTAAGTCATGT  
CCATTTCCAGTGAAGTCTGGACGGTCTGTACTGTTTCGTTCTCAATTTCAATAGAGTTAGGCCTGGCCGGTGTGTTCGA  
CGGTGCTCTGTTCTGTGGCGCTCTGTAGCCACCATCTGTGACATTAGTAGCATGTTCCAACATGGGGAACCTTCGTA  
TGTTTTCTAATCTGGTGTACCTCATTAAAGCACAGTACTCTGATACATATCGTATGTGTGTTATCGGGAGTTTTCT  
ATATATTTCTCAGTGGTGTACCTCGTTGAACACAGGTGACTCTAATATTTCATCGTATGTTTATCGTTATCAAAGCTG  
TGTACCAGGTGGACGTAGCGTTCGAGCAGCGTTTTGAACATGGTACTCGATAACAGCGTGCATGTGGTTCGAGATGGGC  
GTCCAGCGCGGATCTGTGGGGCGGCGACGCACCGTTTCATGGCGACGGTGGCTTTCGGGCGGCGGGCGGTGGAGGCA  
GCGACGACCATCGCGTATAGCCTTGAGTAAGTCCGAGCGCGGATCCGGCTGTGGCTCGGGCTGCGGCGGAGGCGGCT  
TGAGGGCGGAGGCGCCGCGGGCGAGCGCTCCGGGCGACGGCGCTCGCGGGCGCTCCGCGGAGTCCCGCGCACAGCCG  
TCGAGCGGCGGGGCGCCGGGGCGCGGGCGGCGGTGTTCGGCGCCCGGGGTGCTACGGCCTCCTCTGAGGACATCAT  
ACTTGTATTAGATCTAAACTAATGTCTCATATTTGTCTAGGACGTGACCTTGATTGTTTTCTGCTCCCGTGCAGAGC  
GGGAGCGAGGGCGTGCAGTATTTCTGCTCCAGCGCTCTTGGCTCGAGTCTTCTTGTGCTGGCCGAAGTGCATGCC  
ACTGACGATTTGCCGTTTTCAAAGTTTTCGAGCTCGGGCTCCAGCCACTGCGGATCGAGGGACTCGCTCCGTGCGTACAT  
CTGACGTTTTATTGCGACCCATAGTTCGCATGTGTGAACGACGCACCTTGTCCGCTATCCGAGGACGGACGCATTGACT  
CACTCCGCATGCAAAGGTTCCACCGGCGCGGCGGAACGAATCCAAAACCTCTCTTCGATTTCCCTCGATATCCTTC  
TTCTTAACGAGCCAAATTTCCCTCCGAGCCCCGGGTGAAGTAGCTCGACCCCTTACTCACGGAGTACTTCTCTTTATT  
TTTAAATTTACAAGTCTTAAATTTATTTTGGAGATTTACATCATCGTTGACTTTGTGTACGTTAGTGCGGGCGGGGT  
CGGGGACGCGACATTACGGAACGCGGTGCCGTGTGACGGAACCTGGTCTGCGATTTTTGCTCCGAGACTAGGAGAA  
CGGATCGTCACTTCGACGGGCGATGACATTTGTTTTAAATTCGGTTTTTATTATCTTCTGTGGCTCGGGCTTTTTGAAT  
AACTTTTTCTCACCAGAATTGCTGTTCGCTTCGTTGCCATCTCAGAGATGACAAGTTCCGAGAATTTTCGAGTCAGAC  
TTTTGCTGTCTTCGAGAGTCCCTGTAAAGTTACATGGTGTGCCTATAGAAAGCACTTTTTTCGGATACATTTGCC  
AACTCAAAGTGTATGTTATCTTTAAAGGGAGTGGCGGGTGGTGAAGATCTTCTTTGCTATCAGATCTAATCTCTC  
TGTGCGAGAACGCCCTCGACTGATCCAGGGCGAGAGAGCCGCCCGCACTAGCGCTCGCATCTTCAGCGGCTTTTT  
CGAATTTCTTTATTTTATCTCCTACGCCATTAGATTCTCATTTTTTGCAACGTTATCCGAAGCATTCCCGACGGGC  
TCAGTCTTGTTCAGCTACCGTTTTTCATCGTTACAATTTTTTAAATTTATTTATATCATTACCATCTGAAACGAGTGA  
TAATTTTTCACTTTTAAATCGGGATATCCTTTTCTGCTCCAGCATCCTTTTTATTTTTAGACAAGAATATATTTCTCTT  
CTGTAATCGAATTTCTCTGTTTAAATTTAAATGCTGAAACAGGAGGCGACGTTACTTCTTTATTTGGCGGAGGCGAA  
GTGATTTGATTTTTGAATGGCAACGAAGCCATATCTTTCTTAGGCGGGGAGATAAGACTTTTATTCAGGGCGGAGG  
AGACGTGACTTTTTGGAGGTGAAGTGTTTTTCTTCTTGGGTGGCGACGGTACATCCTTTTTGCGGCGGCGACAGAACCA  
CCTCCTTTTTTCGGCAACACCTGTTTCTTTGGCGACGACGTTTCATTTTTGGGCGGTGACGCGGTAACCGCGTTAGTG

ACTTTTCGGGAGCGACACGTCCCCTTTTCGGGGGAGTGATTTCTTTAACTGGGGGCGACTTCGCCTTACCGACCTCTAC  
CTTCGCCTTCTGCTCTATATCGCGA

>aly374.14:G1169T

CTTAATTTTCTCCTGTGACGTCTAACATGTTTTATAAACGAATTGAAGTCGCCTTTAGCATAATTCTTACAGTCTAT  
GCAAGTGAATGCATTACATTTACCATGCGTGATCTTAGCATGAGACCGTAAAGTAATCACGTCTAAAAATTCGATGT  
TACAGTAGGCGCAAATCCACGGATAGTCTTTCCACGCCAAAACGACTTTCTTATCAATCCCAGACACTTCCTTTCGCG  
TAGATTTCTACGTCTCTGTAAACGGCATTGTCACATAGCGGCATCTAATATATCCTGAACGTTCAATGTTTGATC  
GTAGTCAGATATAGGTGACTCCTCAATTATGGTACCGTCTATTTCTTCTTTTGGTTCCTGTTTTAAATTCATTGTTT  
CTGAGTGGCCAGTGTCTCCTGGAACCTCTAATTTAATCGGTAAACTCTCCGCTACATCGTTATTCAAGAAATCATAA  
GCCCTATCATCGTCAGACAAATCGAATTTAGAATCTTCGTTTCGAAAATAAAAGCAATAACACATCTTGTGATCTCTT  
AATTTTATCTAGGAACCTCGTAGGCCTTATTCAAGGAGTCGTAACACACGAAACAAATAGTTTTTCGGTAGTGTTTTTAT  
CGGAATTCACCTCCACATACATTGCGTTCAAAAACCGAGTTTTAAAAACGATTTCTTCGCATATCTTCTCGTTTTTA  
ATTAGGTTCAACACTTTATCAGGACTTTTGGGTTCCGCACAAAGACGGCAATACGTGTTTTTGTACGTTTCCATTTA  
GCTACCATCTTCTGTTTTAATCACCCTTTTTTTGCTCGCTTAGCTGGCACCATGATTTTTGGTCTTCCACTCTTCTG  
TCCCTGGATCCTGATGTTGTAATAATTTGTCCAGTCTGTGGGTTAATAGGGAACACTCCATCTGGAGTGATTTTTCTTC  
TTAGACGTGTGAGTTCATGCCTACGTTTCATATGTTTATTGTAATTTGACCAATTCGTGAACTCCATTCCACAATT  
CTGGCAAGAATACGGCTTAGCTCCGGTGTGCTGTGTTTCATGTTCTTCAAAATCTGCTTAAACCTAAACGCCTTGT  
TGCAATACTGACAGACGTGTGGCATAGAGTCTGTGTGTATAATTTTATGTGCATTCAACTGATACTGGAGTCTGAAA  
CACCGGCCGCACTTTTACACGAGTATGGTTTTAACTCCAGAGTGCATTTCAACATGCCTCCGTAACATATTAGGGAA  
AAGGAAGGACTTGTAAACAGATTCTACATGTGTGTGGACGGATCTGGTCATGAGACATAATGTGGGATGTGAGCGTTC  
CTTTATTGAAGAACATTTTCCACATCGGTACATGTAAAATTCCTTTTACGATCATCTGTGTGGATTTTTCATGTGA  
TCTCGTAGGCTATTTGGATTTTTGTACACCTTCTTACATAGTTTACAAGTGAGGTGAGCTTCCGTGATGGGTGTTCC  
TCGTTTTCTTCTTGGTTTTTGGTTTTGATCAAGTTGTACTCATCTAGATGCTTTTTGTAGAGCATCATCGTTAC  
GTAACACCTCACCACATAAGCCACATGGCACTTCGCTTTTTTGGAAATGTACTTGTAGGTGGGAATTTGAGCTATCT  
TCTTCAATGACTGCATCACAGTAGTAACAGCGTTTTC

>aly425.5:G1558T

ATGGCCTCGTCTGCGAGCGGCAACATCGTCTGAGTGGTTGCGATCGCTCCACTTGGGCCAATACCGGGAGAGTTT  
TATCGACAACGGTTACGACGACTTGGAAATATGCAAACAAGTCGGCGAACCCGATTTGGACGCGATCGGCGTCTCA  
ACCCTGCTCATCGGCAGCGGTTGCTGCACTCTGTAAGAAGTTTGGAGAGGAAGGTGCAGCGGCTGTTTACTTTCACG  
TTGGAGGAGGCAGCCGCCGCTCGCGATCCTTGGCCGATGTGAGGAAGAAGCTCGGAAGGAGCAGACGACCGTTCGAGT  
GGAACCGCGCAAATATGCCGACGAGTACGAGGAAGGAAAAGCGGAGTTGGTCAAGATCCCGCGGATTCAACTGAAGC  
GGCTGTTGCGCGAGCGCCTGGCTCAAGACGGGATCCGGCTGGCCCTGCAGCCATATTCCACCACGGATGGCGATCGA  
GGTTACCTGGAAGGTCTCGCATCTCGCTATGCAGACCTCTTCTCCACCCACTACGGTGATGTCTCGACCATCTCGA  
GGAGTTGAGGAGGCACGAGTGGGACGAAATGTCTCCAAGAATGAGGGTCTTGGCGGCCCGGAACACCCCAAACAC  
CTCCATCGGCAAGTCTGGTTCTTCTAGCTCTGAACAATTTGACCACGTTCGATTCTCAGCCGATCTACGTGCCTGGA  
AAGTATTGCCATCAAGCTGCCTCACCAGATAAAGAAGAGGATGAGATCTACGGCTTCGGGTACGGTGTCTTCGGCAA  
ACAGATGCTGCAACGGCAACAGCAGCAGAAGCAGTTGCTGCTCGCACAGCCGACGCAACCGTTGATGCACAATCAAC  
AGCACAATATCAAAGTTGCCTGAGTCTCTCGTTTCGGCCTATTTCTACGAATTTCCCCCTAGTGATAACTGCCTCGGC  
ACTGCCAAAAGAAGGTGACGACGTTCTCAAGACTGCTGCGTGGACTGAAGTCCCACAGGAAAGAAAAGCACGGCTC  
CTGTTCTCCGAAACACTCGCATAGTCTCGACAAGTAGTGCCACCTCAACGAGTCGACACCCCGACAGCGTGCTTC  
AAAGTGGCCTTGGCCTTGGCCCCGGCCCTGATACGGCCTTGGAGTCCATGGTTGACCCAGAGACTATGATCGCCTC  
CGTTCTTTCAAATGAGTGCCGCCCCAACCAAACACCTTCGAAGAGACGATACATAGGTTAAAAGTTTCAGGAAGCTAT  
GAAGAAGAAAGACAAATTAGCCAGAGAACAAGAAGAGATTTTGGAGATATACGGCACGGTCTCATGAATATGGGAC  
GAGACGGAGTCAGGGGACCGTTTGGAGACGACACGTATATGTACGACGATGAAGCGAGAGGCCTATCGGGAAGAGGT  
CACTGGTATGACGAGCCCGCTATGAGAGCGATCCGGAGGACTTTCTTATGGGGGAGGAGCACCAGCAGCGTCTGTT  
TCAAAATGGTTCGAGTTGTTTTACCCTAAACCTTCGAAATGAACCTAGGGGTGAAGGCGTGATATCGTTGCGAAGCG  
CTGGAGATATAAGCCTTAGCGAGACCCCGGAAGAGGATTAATAATTTCCACAGAGCGGCCCTACCCAACCATGTTG  
ATCCCTTTGCGAACGTGAGAGATCGGGAGAGCGGGATTACGCCCATCTGACATCCAATCTATAGTTTCGAGGTT  
GTCTGGCATTTCGCTGGAATCCAGTCTGCTCGGAACGGGATTCACGGAGAGGTTACAGGCAAATGTGAGGCTATCGGA  
TAGGAATAGATCCCTTATCGCCCGCTTCTTTCGGATTACGAAGATCAAGAGAGCGAAACGGATTTCGAACACATAGCC  
ACTGTGCATAAGTCAGCTGAAGAATGCGAAGGGGTGTCCAATTTAGCCGGCAAAGTGCCTGGTCTACGGCAAGATGT  
TCAAAGAAAAATATCAAGATTAAGACAAGAGAGAGGCCCTGAGGGCTCAGATAGGCGAACGAGTGGCGATCAAGCGT  
TCCCATGTTCTAATAGTTCTTTTTGAAAGTCTTCCCAGCGGATCAGGCAGTAGCACACAAGCATTGGTTTCGAGCCGGT  
AGTAATCACTCTCTCTCTCGGCAGAAGAAAACATAGAATTAAGTCCGGCCGGGCGGAGTTTTACTCGTTCCGCAAAT  
GCTGTGTGGGCTCGAGCACTCGTCTGATTACGTCCCCAATATTTACGAGAAAGATGCCTTACGATACAAGAAAGGGG

ATATCATCGAAGTAATCAACATGAACGCTTCCGGGATTTGGAGGGGTGTCCTTAACAATAAAGTCGGCAACTTCAAG  
TTTGCAAACGTCGAAGTACTTTCTGAAAGAGACACAACAAGATCGAGGACTTCTAAATGGTGCAAAAGTCGTGAACG  
ACTGTGGGAAACTCGACCACGAACAGTCTGAAGAATTGTTAAGAAGGATAGATCTGCCTGAATACGCGGTTCGCTTTTG  
CAAGGAATGGATATGAGGATATCGAATTATTTAAAGAAATTGAACCCTCCGATTTAGATTACTTGGGTATCATGACA  
CCCGAGCATCGCACTCGTATTCTTGCTGCCGTACAACCTGCTGCACCAGCTTGAATGTGGCGAAGGTGATGGCGAGGG  
CGAAGGAGGTGGTTCCAGTTCAGAGGGTGGAGACTCCCCGTTTGGTTCGACGTTCAGTTTTCCCCGTGATTCTGGTTGCT  
ACGAAGGAGGCGTTGGAGTAGGGGGAGTTCGAGTACGCACTTCGCCGTTGGTTCATAGAACAGATGAACCATCACAC  
AGGCCTCCAGACCCGGCCCCCTCAGGCGAAACGCTCAGTACGTTCGACGACAGCCTGATGACGCAGAATGCGATAGGAT  
CGAGCGCTATCCTGGAACAGTCCGTGAGAGGACAGTTCGCCGAGCGTGGGCCTTCTGGGGGCGCCAGGGACGATA  
CTTGCGAGTACAGACCATAAGTTGAATGTGGTGAATTCGTAGCGGGCGGTGAGCCGTGTGCGTCTGAGAAGAGCAAT  
ACGCCTTTTGAGATCTATAACTAG

>aly596.8:C1601G

CTGCTTCACTATTCCGATTTTATAATTTCGGAGTTGGTGCTGGAGCACTCATCTGTTGGGGGTGCGCTGGCGTGCAG  
CTTTGGCGCCGTGATCCCCGAAAGGGCGATCACTTTCTCGGGCGGTGGGCCGCCCTGAGGCTGTTTTCTTTATAACGA  
TCGTATCTCCCGACAACACCTGCAAGTCTGTACCCCAAACACCTTTTCTTGTGACTTGGCAACATCTTCAATTTCT  
ACAAGCCTTTTAACTGTGGGATGTTGCGACCACCATCTCTAACCTTCACGAGACCTTCGGCAAGCAAGGCTTCAGT  
CATGTTCTCATCTTTAGTTGGATCTTTTCCGGCCATACTGTTCCGTAATCTCTGGTAGCAGAGTTTGGAGGTTTCT  
CAGCTTTGAAAATTACTTCTTTACCCACTAACTTCTTTCTTAAAAATTTCGCGAGCCTCCCATGCAAATGGTTCATCT  
TTTGTCTCAATATCATCTTATTCTGACAGCATTAGAATTGCTTGACAGAAATCAGGCAACATGCAAAGGCGTACTG  
TAGATCCATCTCGCACATACTCAATAATTGCTTTGACTGGTTGCCATTTCAGTTTGTTCACCATTTGTTTAGGGTTC  
TCCACAGACCACTTGATGTCTCGCACATGATCCTGATTTTCATCACAGCCAGAGACCAATCGACACACCTGGCGAAAC  
CTTGTTTTAATAAAGCCTCTGCTATATTGCCCTGTGGGTGAAGGATTGTTCCAACAAAGTTGTTATTGTTGACAGAC  
TCTAAAACAACCTTCTACTTCTTTTTGCGAGTAGTCTAGATTCGACGAAAAATCTAGCCTCTTCTGCATACGGCTCTGA  
ATCTCCATCTTGTGTTGACTGCAGGGCATTTCGCGCGGTGGTTCGGACGCTGGCAAGGAATATTTTTCTTCTGAGTATT  
ATTGGCCAGTTTGACAACAAAGGCATCTCCATTCACTACTTCCAATACGGTGGCGGAGAATCTTTATCCTTAGGAG  
CGATAACTGGAGCGTTGCTGGTGTAGTTAGTCCAAATACGAAGCCTGCTGTCTTGGCTATACGTTCTGCTGCTCTC  
AGTTGTGCAGCACGTTCCACCAGCCACAACAGTGCAGCAAATTTTTTTCAGGGAAGTTATCCTTCGCGGGCTGGATAT  
AGTCCACGGTCACGTTGATCTTTTTGCCTATTAACCTTTTTCTAAGGAATTCACGTGCTTCAAACATCCATGGTACT  
CCATCAAGTGAAGAATTTGACAGTCTTATCATCAGTAATCTTTTCAATTCGCCCCTGTACCACATGTTGTCCAGA  
GAGAATGAGCTGCACAGATCGCGCCCTTCTAGGCACGTAGGATCCTGGCAAGGGGGGATTGTTTTGGAAGTCTTG  
ACGAATCTTTTCCATTAGAGCTTCTAGCTTACTGCCCGCTCAATGTATTGGACGTAGAAGGTGCCCTCGGGGGTGA  
CATCGGTGACGATCACTTTCTCGTATTTAACGACGCGATCGTTAGCCGTGGCGTTTCTCTCTTTTTCCACTTCTTTT  
TCGGCTTCCACAAAGTCTCTCCAGATGCCAACTCGATTCTTCTTGGCATTCTTCTCGGCAGTCTTAATGGCGCGGGC  
GAATTCGATGTCTCAGCCGTGTGGTGCATGGTGGCTAACCCTGTTCAACGAGCGACACAGAAATATTGTCGTTGT  
CGAGCCACAGCCAGCCAATGAAGTTGCCGGCTTTATCCATTTCTCGATGGAAACGATGACATCGCGCTGTAATACT  
CTTTCTTGGTGAATTGCAGTGCTTCTCTCCGAAGGGTTCGGCTTCTTGCATGGCGCCGCCCGGATGCCGGGCCCT  
GGCTCCGCGGGGACAGTTGATGCCCGCTAGCAAGAAAGTGACAAGCACAGATTCTTGGGAATGTATAGTCTCATT  
GTGAGCCGCTAGCCACAACTCTACGGTTCGCTTCTGTCTTTTGGCCCTCTTTAAGAATGGGAAGAATTTTCTGGCC  
TTCGCTGAATCACCCTGGTGTCTGGATGCGGTGAGCGGGGATGTCCTTTTTGGCGTGAACGCCGATGCCAGCCTT  
TTGAGCTTTCAACTCTGCTTCAAGCAGCTTATCGTAATGTGAGCTCCTTTGATCATTGTCATTCTGTATCTTACAA  
CTGTTGCATAGCCTTCGCCGACCAAGGCTTCGGCAATATTTCTTAGCAATGTCTGCGTTGTTCAATGGATCAACAAG  
TGTAACGGCCGGTGGAGACCCACGATTTTCAATGTTCAAGAACAGTTTCTTGTGGAGCGTGTCCATGGAGAAGGCTC  
GCACCGCTCCAGCCTATCGTCAGCGTCCGACGGAACTTCACGCCATTAGTGTATATTCATGGGCATAGCTTGGC  
TCGAGCTCGGTACCAGGAGGGAGCAATGACAGCCTTGTCAAATTGACACACTAGCGGCGGGCGCCGAACCTCCACGGC  
GTCGTGTCGGTGTGTCGCCGTGCCGCCAGAGGTTGAGGCGCGAGCTCTTGGCGTGTCTCTGCGCGGCGGGTACT  
CCGCCAGCAGCGCCCGCAGGCGGTGGTTCGCGCGTGCCTCCACCAACACCAAGCCCTCCTTGATCAGGTT
